# Supplementary material
Source: publisher figshare collection journal article supplement (https://frontiersin.figshare.com/ndownloader/files/28222530)
Supplement: Supplementary file 1 [file 28222530]

Ind.No	Location	Latitude (decimal degrees)	Longitude (decimal degrees)	Depth.max (m)	Depth.min (m)	Month	Date.collected (DD.MM.YYYY)	Visual.ID	Length (�m)	Feature.measured	Sequence	Total.reads	Percent.highest.seq	Barcoding.ID	Barcoding.ID.percent	Barcoding.ID.source	Meroplankton	Match	Final.ID
1	North	77.634	31.689	140	110	August	11.08.2018	Juvenile ophiuroid	NA	NA	actatctgggccagtcgcccatgcaggaggatgtgttgatttagctatattttctcttcatttagctggtgcatcttcgataatggcctctataaaatttattacaacaataattaatatgcgagcacctggaatgacaatggatcgaactcctttatttgtttgatcaattttaataaccacatttcttcttttattatctcttcctgttttagctggagcaattactatgttattaacagatcgaaaaattaaaacttctttttttgatccaacaggaggaggagatccaatcttattccaacatttattt	1607	99.63	Ophiura robusta	100	BOLD	Yes	Yes	Ophiura robusta
2	North	77.634	31.689	140	110	August	11.08.2018	Bivalve veliger	267	Anterior-posterior length	No sequence	0	0	No sequence	0	No sequence	No sequence	No	Insufficient reads
3	North	77.634	31.689	140	110	August	11.08.2018	Mitraria	NA	NA	actctctggtaatgtctctcatgccggggggtctgtagatttagctattttttctttacacttagcaggtgcatcttcgattttaggtgctgttaatttcatgtgcacagtaataaatatacgatctgatgatgctgaatttgaacaaacacctttatttgtggtggctatttacttaacagtattacttctgcttttatctctacctgtactagcaggggggatcactatattgttaacagatcgaaattttaatactagattttttgacccagcaggtgggggtgacccagtgctttttgctcatttgttt	2758	99.78	Galathowenia oculata	100	BOLD	Yes	Yes	Galathowenia oculata
4	North	77.634	31.689	140	110	August	11.08.2018	Trochophore?	NA	NA	tttatctgattctaagtatcattctggaatctcagtagatttagctatttttagattacatctagctggaatctcatcaattctgggtagaattaactttataactacaattatttgttcacgtactactaaaatagtaagaatagatcgtttacctctaatgctttgatcattaggagtaacggcatttctattagttactactttaccagttttagcaggtgctattacaatgttactgactgatcgtaactttaatacatcattttttgatccttctggaggaggaaaccctgtactttatcaacacctattt	974	88.4	Synchaetidae	98.1	BOLD	No	Yes	Synchaetidae
5	North	77.634	31.689	140	110	August	11.08.2018	Trochophore?	NA	NA	attaagcagtatttctggtcacccgggagccgcagttgatatggctatttttagcatacacttagccggcatgtcttctatccttggatcaatcaacatgattgttactattcttaatatgcgtgcacctggaatgggtctatttaaaatgccgctatttgtttggtctattttatttacagcatttctactaattttagcgcttcctgttcttgctggtgctattactatgctactaacagatcgtaattttggtacaaatttcttctcaccagaaggtggtggagatccaattttattccagcatttattc	326	48.77	Leucothoidae	83.5	BOLD	Ambiguous	No	Insufficient reads
6	North	77.634	31.689	140	110	August	11.08.2018	Bivalve veliger	293	Anterior-posterior length	attgtcttcatacccattttctggtgcatctatagattttgtaattttctctattcatgttgctggggcttcttctattgctggagctttaaactttttaactacgggtttaaatatgcgaattaaatcaatagagttaaagcgaatacctttatttgtttgatctattattgtaactgcttttctattggtgttagcaatgcctgttttggcgggagctgttactatgcttattagggaccgtcattttaatacaactttttatgatccagcgggagggggggatcctgtattatttgtgcatctattt	2	50	Hiatella sp. K	100	BOLD	Yes	Yes	Insufficient reads
7	North	77.634	31.689	140	110	August	11.08.2018	Trochophore?	NA	NA	tttgtcaggccctaccgcacatgcaggaggctgcgtagacctcgcaattttttctctccacctagcaggtgcatcttcaattatggcctcaataaaatttattacaactattataaatatgcgtaggcccggcatgaccatggatcgacttccgctttttgtttgatctattttcttaacaactatattactactcctttctctgcctgttttagcaggagctattacaatgctactaactgatcgtaacataaaaacaacgttttttgatcctacaggaggaggagacccaatacttttccaacatttattt	4	75	Ophiopholis aculeata	100	BOLD	Yes	No	Insufficient reads
8	North	77.634	31.689	140	110	August	11.08.2018	Mitraria	NA	NA	actctctggtaatgtctctcatgccggggggtctgtagatttagctattttttctttacacttagcaggtgcatcttcgattttaggtgctgttaatttcatgtgcacagtaataaatatacgatctgatgatgctgaatttgaacaaacacctttatttgtggtggctatttacttaacagtattacttctgcttttatctctacctgtactagcaggggggatcactatattgttaacagatcgaaattttaatactagattttttgacccagcaggtgggggtgacccagtgctttttgctcatttgttt	1639	97.5	Galathowenia oculata	100	BOLD	Yes	Yes	Galathowenia oculata
9	North	77.634	31.689	140	110	August	11.08.2018	Bivalve veliger	352	Anterior-posterior length	actatctgcttgattaggacatcccgcaccggctatagaatttataattttaggtctacatattgcaggtatgtcttctatttttgcaagaattaattttgtgacaacaggtgctaacatacgtcctgagggggtggcacctcagcgcactactttatttgtagtgtctgtcattattacatcatttttactagtggtggcaatacccgtgttggctgctgggttaactatgcttttaactgatcgaaattttaatacttcttttttcgatcccgtcggaggaggggatcctgtcttatttattcatctcttt	1476	99.59	Macoma calcarea	100	BLAST	Yes	Yes	Macoma calcarea
10	North	77.634	31.689	140	110	August	11.08.2018	Unidentified blob	NA	NA	cttgtcaagtaatatcgctcatgcaggaggctctgtggactttgcaattttttccttacacttagctggtgtcagatctattttaggggctgttaatttcatcagaactctgggtaatctacgtgtattcggaatactattagaccgaatacctttatttgcatgatcagtcctagttactgctattctattattattatccttacctgtattagctggtgctattaccatactactgactgaccgaaatcttaatacttctttttatgacgttggaggggggggagatcctattttataccagcatcttttt	61	88.52	Microcalanus pygmaeus	99.3	BOLD	No	No	Unknown
11	North	77.634	31.689	140	110	August	11.08.2018	Bivalve veliger	344	Anterior-posterior length	actatctgcttgattaggacatcccgcaccggctatagaatttataattttaggtctacatattgcaggtatgtcttctatttttgcaagaattaattttgtgacaacaggtgctaacatacgtcctgagggggtggcacctcagcgcactactttatttgtagtgtctgtcattattacatcatttttactagtggtggcaatacccgtgttggctgctgggttaactatgcttttaactgatcgaaattttaatacttcttttttcgatcccgtcggaggaggggatcctgtcttatttattcatctcttt	1357	97.86	Macoma calcarea	100	BLAST	Yes	Yes	Macoma calcarea
12	North	77.634	31.689	140	110	August	11.08.2018	Bivalve veliger	290	Anterior-posterior length	gttaacatcaattgaatttttaagggacccttcaatagatatagctattttttcactacatcttggcggtgtttcttctattgcggcgagtttaaatttcgcgaggacatgtgttaatatgcggcaagagggccggggcctacataaaattcctatatttccaatttccctggggatcactgctttacttttaattatcgctatgccggtgttggcgggggccctaactatactattattggatcgaaattttgcaactaggttttttgatccggtgggagggggtgatccaattttgtttatacatctattt	976	99.28	Ciliatocardium ciliatum	100	BLAST	Yes	Yes	Ciliatocardium ciliatum
13	North	77.634	31.689	140	110	August	11.08.2018	Polychaete juvenile	NA	NA	cttgtctaatggtatttgtcattcagggccttcagttgatttagctattttttctctacacttggctgggatttcttctattctagcctctattaattttttaggtactttccgtttagcagtttctggaatttgagactacatgcgagttcctttgtttgtatggtctattgttgtaactacaggtcttttattgttagctttgcccgttttagccggctgtcttactatgttgttaacagaccgtaatataaatactactttttttgatcctgctggagggggggaccctgttttattccaaggcctattc	3109	99.87	No match	0	No match	No match	No	Unknown
14	North	77.634	31.689	140	110	August	11.08.2018	Bivalve veliger	298	Anterior-posterior length	attgtcttcatacccattttctggtgcatctatagattttgtaattttctctattcatgttgctggggcttcttctattgctggagctttaaactttttaactacgggtttaaatatgcgaattaaatcaatagagttaaagcgaatacctttatttgtttgatctattattgtaactgcttttctattggtgttagcaatgcctgttttggcgggagctgttactatgcttattagggaccgtcattttaatacaactttttatgatccagcgggagggggggatcctgtattatttgtgcatctattt	823	99.76	Hiatella sp. K	100	BOLD	Yes	Yes	Hiatella sp. K
15	North	77.634	31.689	140	110	August	11.08.2018	Bivalve veliger	263	Anterior-posterior length	gttaacatcaattgaatttttaagggacccttcaatagatatagctattttttcactacatcttggcggtgtttcttctattgcggcgagtttaaatttcgcgaggacatgtgttaatatgcggcaagagggccggggcctacataaaattcctatatttccaatttccctggggatcactgctttacttttaattatcgctatgccggtgttggcgggggccctaactatactattattggatcgaaattttgcaactaggttttttgatccggtgggagggggtgatccaattttgtttatacatctattt	919	99.89	Ciliatocardium ciliatum	100	BLAST	Yes	Yes	Ciliatocardium ciliatum
16	North	77.634	31.689	140	110	August	11.08.2018	Bivalve veliger	222	Anterior-posterior length	No sequence	0	0	No sequence	0	No sequence	No sequence	No	Insufficient reads
17	North	77.634	31.689	110	30	August	11.08.2018	Bivalve veliger	240	Anterior-posterior length	attgtcttcatacccattttctggtgcatctatagattttgtaattttctctattcatgttgctggggcttcttctattgctggagctttaaactttttaactacgggtttaaatatgcgaattaaatcaatagagttaaagcgaatacctttatttgtttgatctattattgtaactgcttttctattggtgttagcaatgcctgttttggcgggagctgttactatgcttattagggaccgtcattttaatacaactttttatgatccagcgggagggggggatcctgtattatttgtgcatctattt	674	99.85	Hiatella sp. K	100	BOLD	Yes	Yes	Hiatella sp. K
18	North	77.634	31.689	110	30	August	11.08.2018	Unidentified blob	NA	NA	actcagtaatttatctggtcacccaggagcagcagttgatatggcgatatttagtttacatcttgctggtatgtcgtccattttaggtgcaataaatatgattgtaactatatttaacatgcgtgcgccaggaatgagcatgtttaaattaccattatttgtatggtcaatattgatcactgcatttttacttgtacttgctcttccagttcttgctggtgcgattactatgctgttaaccgatagaaatttcggcactaatttttttaaaccagatggtggtggtgatccaattctatttcaacatttattt	692	99.42	Macrothrix	79.6	BLAST	No	No	Unknown
19	North	77.634	31.689	110	30	August	11.08.2018	Eyed blob	NA	NA	tcttgctggaaatctagctcatgctggaggttcagtagatttagctattttttctttacatttggctggagcttcttcaattttaggtgctattaattttatcacaactattattaatatgcgttgacgaggaatacattttgagcgtttacctttatttgtgtgatctgttaaaattactgcagtattattattattatctttacctgttttagctggggcaattactatattattaactgaccgtaattttaatactgctttttttgatcctgcaggaggtggagaccctattttatatcagcatttattt	3	66.67	Cephalothrix iwatai	99	BOLD	Yes	Yes	Insufficient reads
20	North	77.634	31.689	110	30	August	11.08.2018	Mitraria	NA	NA	actctctggtaatgtctctcatgccggggggtctgtagatttagctattttttctttacacttagcaggtgcatcttcgattttaggtgctgttaatttcatgtgcacagtaataaatatacgatctgatgatgctgaatttgaacaaacacctttatttgtggtggctatttacttaacagtattacttctgcttttatctctacctgtactagcaggggggatcactatattgttaacagatcgaaattttaatactagattttttgacccagcaggtgggggtgacccagtgctttttgctcatttgttt	1613	100	Galathowenia oculata	100	BOLD	Yes	Yes	Galathowenia oculata
21	North	77.634	31.689	110	30	August	11.08.2018	Ophiopluteus	1143	Posterodorsal arm	ttatcaggtccggtagctcacgcaggtggttgtgtagatttagcaatattttctttacatttagctggtgcttcttctataatggcctcaataaattttataactacaataattaatatgcgagctcccggtatgacaatggaccgagtccctttatttgtttgatcaatttttattacaacttttttattattattatctttaccagttttagctggtgcaattacaatgttattaactgaccgtaatataaaaacttccttttttgatccaacaggaggaggagacccaatattattccaacacttgttc	2341	92.4	Ophiocten gracilis	100	BOLD	Yes	Yes	Ophiocten gracilis
22	North	77.634	31.689	110	30	August	11.08.2018	Ophiopluteus	1145	Posterodorsal arm	ttatcaggtccggtagctcacgcaggtggttgtgtagatttagcaatattttctttacatttagctggtgcttcttctataatggcctcaataaattttataactacaataattaatatgcgagctcccggtatgacaatggaccgagtccctttatttgtttgatcaatttttattacaacttttttattattattatctttaccagttttagctggtgcaattacaatgttattaactgaccgtaatataaaaacttccttttttgatccaacaggaggaggagacccaatattattccaacacttgttc	1737	99.77	Ophiocten gracilis	100	BOLD	Yes	Yes	Ophiocten gracilis
23	North	77.634	31.689	110	30	August	11.08.2018	Bivalve veliger	310	Anterior-posterior length	actatctgcttgattaggacatcccgcaccggctatagaatttataattttaggtctacatattgcaggtatgtcttctatttttgcaagaattaattttgtgacaacaggtgctaacatacgtcctgagggggtggcacctcagcgcactactttatttgtagtgtctgtcattattacatcatttttactagtggtggcaatacccgtgttggctgctgggttaactatgcttttaactgatcgaaattttaatacttcttttttcgatcccgtcggaggaggggatcctgtcttatttattcatctcttt	454	98.68	Macoma calcarea	100	BLAST	Yes	Yes	Macoma calcarea
24	North	77.634	31.689	110	30	August	11.08.2018	Ophiopluteus	1376	Posterodorsal arm	tttatctgggccagtagcacacgcaggtggttgtgtagacttagcaatattttctttacatttagctggtgcttcttctataatggcttcaataaattttattacaacaataataaatatgcgagctcccggtatgacaatggaccgaactcccttatttgtttgatcaatttttattacaacttttttattattattatcactaccagttttagctggggcaattacaatgcttcttactgaccgtaaaattaaaacttctttctttgaccccacaggagggggagaccctatattatttcaacatttattt	1263	99.84	Ophiocten sericeum	100	BOLD	Yes	Yes	Ophiocten sericeum
25	North	77.634	31.689	110	30	August	11.08.2018	Ophiopluteus	1313	Posterodorsal arm	ttatcaggtccggtagctcacgcaggtggttgtgtagatttagcaatattttctttacatttagctggtgcttcttctataatggcctcaataaattttataactacaataattaatatgcgagctcccggtatgacaatggaccgagtccctttatttgtttgatcaatttttattacaacttttttattattattatctttaccagttttagctggtgcaattacaatgttattaactgaccgtaatataaaaacttccttttttgatccaacaggaggaggagacccaatattattccaacacttgttc	1720	24.65	Ophiocten gracilis	100	BOLD	Yes	Yes	Ophiocten gracilis
26	North	77.634	31.689	110	30	August	11.08.2018	Mitraria	NA	NA	actctctggtaatgtctctcatgccggggggtctgtagatttagctattttttctttacacttagcaggtgcatcttcgattttaggtgctgttaatttcatgtgcacagtaataaatatacgatctgatgatgctgaatttgaacaaacacctttatttgtggtggctatttacttaacagtattacttctgcttttatctctacctgtactagcaggggggatcactatattgttaacagatcgaaattttaatactagattttttgacccagcaggtgggggtgacccagtgctttttgctcatttgttt	2856	81.37	Galathowenia oculata	100	BOLD	Yes	Yes	Galathowenia oculata
27	North	77.634	31.689	110	30	August	11.08.2018	Ophiopluteus	681	Posterodorsal arm	tttgtcaggccctaccgcacatgcaggaggctgcgtagacctcgcaattttttctctccacctagcaggtgcatcttcaattatggcctcaataaaatttattacaactattataaatatgcgtaggcccggcatgaccatggatcgacttccgctttttgtttgatctattttcttaacaactatattactactcctttctctgcctgttttagcaggagctattacaatgctactaactgatcgtaacataaaaacaacgttttttgatcctacaggaggaggagacccaatacttttccaacatttattt	2951	15.18	Ophiopholis aculeata	100	BOLD	Yes	Yes	Ophiopholis aculeata
28	North	77.634	31.689	110	30	August	11.08.2018	Mitraria	NA	NA	actctctggtaatgtctctcatgccggggggtctgtagatttagctattttttctttacacttagcaggtgcatcttcgattttaggtgctgttaatttcatgtgcacagtaataaatatacgatctgatgatgctgaatttgaacaaacacctttatttgtggtggctatttacttaacagtattacttctgcttttatctctacctgtactagcaggggggatcactatattgttaacagatcgaaattttaatactagattttttgacccagcaggtgggggtgacccagtgctttttgctcatttgttt	2934	58.11	Galathowenia oculata	100	BOLD	Yes	Yes	Galathowenia oculata
29	North	77.634	31.689	110	30	August	11.08.2018	Ophiopluteus	1130	Posterodorsal arm	ttatcaggtccggtagctcacgcaggtggttgtgtagatttagcaatattttctttacatttagctggtgcttcttctataatggcctcaataaattttataactacaataattaatatgcgagctcccggtatgacaatggaccgagtccctttatttgtttgatcaatttttattacaacttttttattattattatctttaccagttttagctggtgcaattacaatgttattaactgaccgtaatataaaaacttccttttttgatccaacaggaggaggagacccaatattattccaacacttgttc	1782	87.65	Ophiocten gracilis	100	BOLD	Yes	Yes	Ophiocten gracilis
30	North	77.634	31.689	110	30	August	11.08.2018	Eyed blob	NA	NA	tctttcaagaaatattgcacacgcagggggctcagtagattttgctattttttctctacatttggccggggtgagatcaattttaggggcagttaattttattaggactttaggaaacctgcgagtctttggtatattactggaccggataccattattcgcatggtctgtcttagtcactgcggtgctgctattgctctctatgccagtactcgctggcgcgattactatgcttctaacagaccgaaatttaaacacgtcgttttatgatgtgggagggggtggagaccctatcttataccaacatcttttt	537	72.07	Microcalanus pusillus	100	BOLD	No	No	Insufficient reads
31	North	77.634	31.689	110	30	August	11.08.2018	Bivalve veliger	276	Anterior-posterior length	attgtcttcatacccattttctggtgcatctatagattttgtaattttctctattcatgttgctggggcttcttctattgctggagctttaaactttttaactacgggtttaaatatgcgaattaaatcaatagagttaaagcgaatacctttatttgtttgatctattattgtaactgcttttctattggtgttagcaatgcctgttttggcgggagctgttactatgcttattagggaccgtcattttaatacaactttttatgatccagcgggagggggggatcctgtattatttgtgcatctattt	0	0	Hiatella sp. K	100	BOLD	Yes	Yes	Insufficient reads
32	North	77.634	31.689	110	30	August	11.08.2018	Polychaeta 2	NA	NA	attgtcttcatacccattttctggtgcatctatagattttgtaattttctctattcatgttgctggggcttcttctattgctggagctttaaactttttaactacgggtttaaatatgcgaattaaatcaatagagttaaagcgaatacctttatttgtttgatctattattgtaactgcttttctattggtgttagcaatgcctgttttggcgggagctgttactatgcttattagggaccgtcattttaatacaactttttatgatccagcgggagggggggatcctgtattatttgtgcatctattt	0	0	Hiatella sp. K	100	BOLD	Yes	No	Insufficient reads
33	North	77.634	31.689	110	30	August	11.08.2018	Mitraria	NA	NA	actctctggtaatgtctctcatgccggggggtctgtagatttagctattttttctttacacttagcaggtgcatcttcgattttaggtgctgttaatttcatgtgcacagtaataaatatacgatctgatgatgctgaatttgaacaaacacctttatttgtggtggctatttacttaacagtattacttctgcttttatctctacctgtactagcaggggggatcactatattgttaacagatcgaaattttaatactagattttttgacccagcaggtgggggtgacccagtgctttttgctcatttgttt	2777	98.06	Galathowenia oculata	100	BOLD	Yes	Yes	Galathowenia oculata
34	North	77.634	31.689	110	30	August	11.08.2018	Ophiopluteus	1050	Posterodorsal arm	tttgtcaggccctaccgcacatgcaggaggctgcgtagacctcgcaattttttctctccacctagcaggtgcatcttcaattatggcctcaataaaatttattacaactattataaatatgcgtaggcccggcatgaccatggatcgacttccgctttttgtttgatctattttcttaacaactatattactactcctttctctgcctgttttagcaggagctattacaatgctactaactgatcgtaacataaaaacaacgttttttgatcctacaggaggaggagacccaatacttttccaacatttattt	2145	99.44	Ophiopholis aculeata	100	BOLD	Yes	Yes	Ophiopholis aculeata
35	North	77.634	31.689	110	30	August	11.08.2018	Foram?	NA	NA	attaagcacttctttcatgagcttatcaccttcaagtacaggaaatcttatctttggtttattaatctctggtatatcctcatgtctcacatctcttaatttctatacaacaattctaaatctgagatcttattatctgaatttaaagactatgccattattcccttgggctctcttcattacaggaggaatgcttttattaacattaccaatcttatcaggagctcttctaatggtcttggctgatcttcattctaatacacttttctttgaaccaatctttggaggagatcctatattctatcaacacttattt	1812	99.5	Thoracosphaera heimii	96.8	BLAST	No	No	Unknown
36	North	77.634	31.689	110	30	August	11.08.2018	Bivalve veliger	263	Anterior-posterior length	attgtcttcatacccattttctggtgcatctatagattttgtaattttctctattcatgttgctggggcttcttctattgctggagctttaaactttttaactacgggtttaaatatgcgaattaaatcaatagagttaaagcgaatacctttatttgtttgatctattattgtaactgcttttctattggtgttagcaatgcctgttttggcgggagctgttactatgcttattagggaccgtcattttaatacaactttttatgatccagcgggagggggggatcctgtattatttgtgcatctattt	965	99.27	Hiatella sp. K	100	BOLD	Yes	Yes	Hiatella sp. K
37	North	77.634	31.689	110	30	August	11.08.2018	Ophiopluteus	647	Posterodorsal arm	tttgtcaggccctaccgcacatgcaggaggctgcgtagacctcgcaattttttctctccacctagcaggtgcatcttcaattatggcctcaataaaatttattacaactattataaatatgcgtaggcccggcatgaccatggatcgacttccgctttttgtttgatctattttcttaacaactatattactactcctttctctgcctgttttagcaggagctattacaatgctactaactgatcgtaacataaaaacaacgttttttgatcctacaggaggaggagacccaatacttttccaacatttattt	2453	99.88	Ophiopholis aculeata	100	BOLD	Yes	Yes	Ophiopholis aculeata
38	North	77.634	31.689	110	30	August	11.08.2018	Ophiopluteus	750	Posterodorsal arm	actatctgggccagtcgcccatgcaggaggatgtgttgatttagctatattttctcttcatttagctggtgcatcttcgataatggcctctataaaatttattacaacaataattaatatgcgagcacctggaatgacaatggatcgaactcctttatttgtttgatcaattttaataaccacatttcttcttttattatctcttcctgttttagctggagcaattactatgttattaacagatcgaaaaattaaaacttctttttttgatccaacaggaggaggagatccaatcttattccaacatttattt	1885	96.39	Ophiura robusta	100	BOLD	Yes	Yes	Ophiura robusta
39	North	77.634	31.689	110	30	August	11.08.2018	Gastropod veliger	NA	NA	attaagtaatataggtcacataactcaaagagtagatttttgtattttttcattacatttagcaggtttatcatcaattattggggcaatcaacataattacaacaattatagtaagacgttcaaaaataataacactatctcgaataagattatatttatgaagaatattaattactttaattttattattactatccttacctgtacttgcaggtgctatcacaatactattactagatcgtaattttaacactacattttttgatcctgtaggaggaggtgatccaatcttatttcaacatctattt	15	93.33	Limacina helicina	100	BOLD	No	Yes	Limacina helicina
40	North	77.634	31.689	110	30	August	11.08.2018	Limacina?	NA	NA	attaagtaatataggtcacataactcaaagagtagatttttgtattttttcattacatttagcaggtttatcatcaattattggggcaatcaacataattacaacaattatagtaagacgttcaaaaataataacactatctcgaataagattatatttatgaagaatattaattactttaattttattattactatccttacctgtacttgcaggtgctatcacaatactattactagatcgtaattttaacactacattttttgatcctgtaggaggaggtgatccaatcttatttcaacatctattt	247	48.99	Limacina helicina	100	BOLD	No	Yes	Insufficient reads
41	North	77.634	31.689	110	30	August	11.08.2018	Bivalve veliger	329	Anterior-posterior length	attgtcttcatacccattttctggtgcatctatagattttgtaattttctctattcatgttgctggggcttcttctattgctggagctttaaactttttaactacgggtttaaatatgcgaattaaatcaatagagttaaagcgaatacctttatttgtttgatctattattgtaactgcttttctattggtgttagcaatgcctgttttggcgggagctgttactatgcttattagggaccgtcattttaatacaactttttatgatccagcgggagggggggatcctgtattatttgtgcatctattt	1720	74.94	Hiatella sp. K	100	BOLD	Yes	Yes	Hiatella sp. K
42	North	77.634	31.689	110	30	August	11.08.2018	Bivalve veliger	303	Anterior-posterior length	actatctgcttgattaggacatcccgcaccggctatagaatttataattttaggtctacatattgcaggtatgtcttctatttttgcaagaattaattttgtgacaacaggtgctaacatacgtcctgagggggtggcacctcagcgcactactttatttgtagtgtctgtcattattacatcatttttactagtggtggcaatacccgtgttggctgctgggttaactatgcttttaactgatcgaaattttaatacttcttttttcgatcccgtcggaggaggggatcctgtcttatttattcatctcttt	2856	18.56	Macoma calcarea	100	BLAST	Yes	Yes	Macoma calcarea
43	North	77.634	31.689	110	30	August	11.08.2018	Polychaeta 1	NA	NA	ctatcaagaaacctagcccatgcaggcccttcagtggaccttgctattttttccttacatttagcaggtatttcctcaattctaggggcaattaattttattacaactgttatcaatatacggtcaaaaggactacggttagaacgtattcccttattcgtatgatctgtaaaaattaccgctatcctccttcttctatctttacctgtcctcgctggtgcaattaccatactactgacagaccgtaatctaaacacctctttctttgaccctgccgggggaggagatcctattctttaccaacacttgttc	2951	84.34	Pectinaria hyperborea	100	BOLD	Yes	Yes	Pectinaria hyperborea
44	North	77.634	31.689	110	30	August	11.08.2018	Ophiopluteus	546	Posterodorsal arm	tttgtcaggccctaccgcacatgcaggaggctgcgtagacctcgcaattttttctctccacctagcaggtgcatcttcaattatggcctcaataaaatttattacaactattataaatatgcgtaggcccggcatgaccatggatcgacttccgctttttgtttgatctattttcttaacaactatattactactcctttctctgcctgttttagcaggagctattacaatgctactaactgatcgtaacataaaaacaacgttttttgatcctacaggaggaggagacccaatacttttccaacatttattt	2934	41.79	Ophiopholis aculeata	100	BOLD	Yes	Yes	Ophiopholis aculeata
45	North	77.634	31.689	110	30	August	11.08.2018	Bivalve veliger	352	Anterior-posterior length	attgtcttcatacccattttctggtgcatctatagattttgtaattttctctattcatgttgctggggcttcttctattgctggagctttaaactttttaactacgggtttaaatatgcgaattaaatcaatagagttaaagcgaatacctttatttgtttgatctattattgtaactgcttttctattggtgttagcaatgcctgttttggcgggagctgttactatgcttattagggaccgtcattttaatacaactttttatgatccagcgggagggggggatcctgtattatttgtgcatctattt	1782	11.95	Hiatella sp. K	100	BOLD	Yes	Yes	Hiatella sp. K
46	North	77.634	31.689	110	30	August	11.08.2018	Bivalve veliger	318	Anterior-posterior length	attgtcttcatacccattttctggtgcatctatagattttgtaattttctctattcatgttgctggggcttcttctattgctggagctttaaactttttaactacgggtttaaatatgcgaattaaatcaatagagttaaagcgaatacctttatttgtttgatctattattgtaactgcttttctattggtgttagcaatgcctgttttggcgggagctgttactatgcttattagggaccgtcattttaatacaactttttatgatccagcgggagggggggatcctgtattatttgtgcatctattt	537	26.82	Hiatella sp. K	100	BOLD	Yes	Yes	Insufficient reads
47	North	77.634	31.689	110	30	August	11.08.2018	Juvenile ophiuroid	NA	NA	tttatctgggccagtagcacacgcaggtggttgtgtagacttagcaatattttctttacatttagctggtgcttcttctataatggcttcaataaattttattacaacaataataaatatgcgagctcccggtatgacaatggaccgaactcccttatttgtttgatcaatttttattacaacttttttattattattatcactaccagttttagctggggcaattacaatgcttcttactgaccgtaaaattaaaacttctttctttgaccccacaggagggggagaccctatattatttcaacatttattt	1112	99.91	Ophiocten sericeum	100	BOLD	Yes	Yes	Ophiocten sericeum
48	North	77.634	31.689	110	30	August	11.08.2018	Trochophore?	NA	NA	tttatctgattctaagtatcattctggaatctcagtagatttagctatttttagattacatctagctggaatctcatcaattctgggtagaattaactttataactacaattatttgttcacgtactactaaaatagtaagaatagatcgtttacctctaatgctttgatcattaggagtaacggcatttctattagttactactttaccagttttagcaggtgctattacaatgttactgactgatcgtaactttaatacatcattttttgatccttctggaggaggaaaccctgtactttatcaacacctattt	1525	99.93	Synchaetidae	98.1	BOLD	No	Yes	Synchaetidae
49	North	77.634	31.689	110	30	August	11.08.2018	Trochophore?	NA	NA	tttatctgattctaagtatcattctggaatctcagtagatttagctatttttagattacatctagctggaatctcatcaattctgggtagaattaactttataactacaattatttgttcacgtactactaaaatagtaagaatagatcgtttacctctaatgctttgatcattaggagtaacggcatttctattagttactactttaccagttttagcaggtgctattacaatgttactgactgatcgtaactttaatacatcattttttgatccttctggaggaggaaaccctgtactttatcaacacctattt	1458	93.21	Synchaetidae	98.1	BOLD	No	Yes	Synchaetidae
50	North	77.634	31.689	110	30	August	11.08.2018	Ophiopluteus	673	Posterodorsal arm	tttgtcaggccctaccgcacatgcaggaggctgcgtagacctcgcaattttttctctccacctagcaggtgcatcttcaattatggcctcaataaaatttattacaactattataaatatgcgtaggcccggcatgaccatggatcgacttccgctttttgtttgatctattttcttaacaactatattactactcctttctctgcctgttttagcaggagctattacaatgctactaactgatcgtaacataaaaacaacgttttttgatcctacaggaggaggagacccaatacttttccaacatttattt	3133	99.84	Ophiopholis aculeata	100	BOLD	Yes	Yes	Ophiopholis aculeata
51	North	77.634	31.689	110	30	August	11.08.2018	Ophiopluteus	608	Posterodorsal arm	attatccggaccagttgctcacgccggtggctgtgttgatttagctatattttccctccacttagctggtgcttcgtcaataatggcatcaattaactttattactacaattattaatatgcgagcgccaggtatgacaatggatcgaacccctttatttgtttgatcgattctaattacaacatttcttttattactctcattacctgttctagccggagccattaccatgttattaacagaccggaaaattaaaacatctttcttcgacccaacgggaggaggggaccctattttgttccaacacctattt	849	99.53	Ophiura sarsii	100	BOLD	Yes	Yes	Ophiura sarsii
52	North	77.634	31.689	110	30	August	11.08.2018	Bivalve veliger	231	Anterior-posterior length	attgtcttcatacccattttctggtgcatctatagattttgtaattttctctattcatgttgctggggcttcttctattgctggagctttaaactttttaactacgggtttaaatatgcgaattaaatcaatagagttaaagcgaatacctttatttgtttgatctattattgtaactgcttttctattggtgttagcaatgcctgttttggcgggagctgttactatgcttattagggaccgtcattttaatacaactttttatgatccagcgggagggggggatcctgtattatttgtgcatctattt	2519	99.6	Hiatella sp. K	100	BOLD	Yes	Yes	Hiatella sp. K
53	North	77.634	31.689	110	30	August	11.08.2018	Gastropod veliger	NA	NA	cttagcaagaaatattgcccacgcgggcccctctgtagatatggctattttctcccttcaccttgcggggatttcctctatccttggggccattaattttattactacagttattaacatacgatgaagaggattacgactagaacgaatccccctattcgtgtgaggagtagttattactactattctcctacttctatcgctcccggttcttgcgggggccatcactatattacttacagatcgcaacttaaatactgcattctttgaccctgcaggggggggcgatccaattttataccaacatctcttc	2	100	Nothria conchylega CMC02	99	BOLD	Yes	No	Insufficient reads
54	North	77.634	31.689	110	30	August	11.08.2018	Bivalve veliger	297	Anterior-posterior length	attgtcttcatacccattttctggtgcatctatagattttgtaattttctctattcatgttgctggggcttcttctattgctggagctttaaactttttaactacgggtttaaatatgcgaattaaatcaatagagttaaagcgaatacctttatttgtttgatctattattgtaactgcttttctattggtgttagcaatgcctgttttggcgggagctgttactatgcttattagggaccgtcattttaatacaactttttatgatccagcgggagggggggatcctgtattatttgtgcatctattt	1199	98.75	Hiatella sp. K	100	BOLD	Yes	Yes	Hiatella sp. K
55	North	77.634	31.689	110	30	August	11.08.2018	Ophiopluteus	595	Posterodorsal arm	tttgtcaggccctaccgcacatgcaggaggctgcgtagacctcgcaattttttctctccacctagcaggtgcatcttcaattatggcctcaataaaatttattacaactattataaatatgcgtaggcccggcatgaccatggatcgacttccgctttttgtttgatctattttcttaacaactatattactactcctttctctgcctgttttagcaggagctattacaatgctactaactgatcgtaacataaaaacaacgttttttgatcctacaggaggaggagacccaatacttttccaacatttattt	2415	98.8	Ophiopholis aculeata	100	BOLD	Yes	Yes	Ophiopholis aculeata
56	North	77.634	31.689	110	30	August	11.08.2018	Gastropod veliger	NA	NA	tttgtcaggccctaccgcacatgcaggaggctgcgtagacctcgcaattttttctctccacctagcaggtgcatcttcaattatggcctcaataaaatttattacaactattataaatatgcgtaggcccggcatgaccatggatcgacttccgctttttgtttgatctattttcttaacaactatattactactcctttctctgcctgttttagcaggagctattacaatgctactaactgatcgtaacataaaaacaacgttttttgatcctacaggaggaggagacccaatacttttccaacatttattt	4	100	Ophiopholis aculeata	100	BOLD	Yes	No	Insufficient reads
57	North	77.634	31.689	110	30	August	11.08.2018	Gastropod veliger	NA	NA	tttatctagaaatttagctcattctggtccttcagttgatatagctattttttcattacatatagcaggtgtttcttctattttgggagcaattaattttattgtaactattatatttaatcgtgtaattggtataagatttaaacgtattcctttatttgtttggtctgtattaattactgctattttattattattagcattacctgttttagcgggtgtaattactatattgttaactgatcgtaatttaaatactagattttttgatccagcaggaggaggagatcctattttatttcaacatttattt	3	100	Sphaerodorum flavum	100	BOLD	Yes	No	Insufficient reads
58	North	77.634	31.689	110	30	August	11.08.2018	Bivalve veliger	333	Anterior-posterior length	attgtcttcatacccattttctggtgcatctatagattttgtaattttctctattcatgttgctggggcttcttctattgctggagctttaaactttttaactacgggtttaaatatgcgaattaaatcaatagagttaaagcgaatacctttatttgtttgatctattattgtaactgcttttctattggtgttagcaatgcctgttttggcgggagctgttactatgcttattagggaccgtcattttaatacaactttttatgatccagcgggagggggggatcctgtattatttgtgcatctattt	195	99.49	Hiatella sp. K	100	BOLD	Yes	Yes	Hiatella sp. K
59	North	77.634	31.689	110	30	August	11.08.2018	Eyed blob	NA	NA	tcttgctggaaatctagctcatgctggaggttcagtagatttagctattttttctttacatttggctggagcttcttcaattttaggtgctattaattttatcacaactattattaatatgcgttgacgaggaatacattttgagcgtttacctttatttgtgtgatctgttaaaattactgcagtattattattattatctttacctgttttagctggggcaattactatattattaactgaccgtaattttaatactgctttttttgatcctgcaggaggtggagaccctattttatatcagcatttattt	4947	99.86	Cephalothrix iwatai	99	BOLD	Yes	Yes	Cephalothrix iwatai
60	North	77.634	31.689	110	30	August	11.08.2018	Gastropod veliger	NA	NA	No sequence	0	0	No sequence	0	No sequence	No sequence	No	Insufficient reads
61	North	77.634	31.689	110	30	August	11.08.2018	Eyed blob	NA	NA	tctttcaagaaatattgcacacgcagggggctcagtagattttgctattttttctctacatttggccggggtgagatcaattttaggggcagttaattttattaggactttaggaaacctgcgagtctttggtatattactggaccggataccattattcgcatggtctgtcttagtcactgcggtgctgctattgctctctatgccagtactcgctggcgcgattactatgcttctaacagaccgaaatttaaacacgtcgttttatgatgtgggagggggtggagaccctatcttataccaacatcttttt	854	93.33	Microcalanus pusillus	100	BOLD	No	No	Unknown
62	North	77.634	31.689	110	30	August	11.08.2018	Gastropod veliger	NA	NA	attaagtaatataggtcacataactcaaagagtagatttttgtattttttcattacatttagcaggtttatcatcaattattggggcaatcaacataattacaacaattatagtaagacgttcaaaaataataacactatctcgaataagattatatttatgaagaatattaattactttaattttattattactatccttacctgtacttgcaggtgctatcacaatactattactagatcgtaattttaacactacattttttgatcctgtaggaggaggtgatccaatcttatttcaacatctattt	53	79.25	Limacina helicina	100	BOLD	No	Yes	Limacina helicina
63	North	77.634	31.689	110	30	August	11.08.2018	Ophiopluteus	1155	Posterodorsal arm	ttatcaggtccggtagctcacgcaggtggttgtgtagatttagcaatattttctttacatttagctggtgcttcttctataatggcctcaataaattttataactacaataattaatatgcgagctcccggtatgacaatggaccgagtccctttatttgtttgatcaatttttattacaacttttttattattattatctttaccagttttagctggtgcaattacaatgttattaactgaccgtaatataaaaacttccttttttgatccaacaggaggaggagacccaatattattccaacacttgttc	1758	99.43	Ophiocten gracilis	100	BOLD	Yes	Yes	Ophiocten gracilis
64	North	77.634	31.689	110	30	August	11.08.2018	Bivalve veliger	257	Anterior-posterior length	tctttcaagaaatttaatagggcattctggtgctgcgggagactttttaattttatctcttcatatcggaggtgcttcatctattatagcatccttaaatttttatagaacgtgaggaaatatgcgtgcaggatgtcatcccttccatcgtgtaccccttttttgtagttctattggggtcacaaggtttcttttaattctagctatgcctgtcttagcaggggcattaacaatactgttaacagatcgcaattttaatactgctttttttgatcctaccggtttaggggaccctatattgtttgttcatttattt	469	98.29	Mya truncata	100	BLAST	Yes	Yes	Mya truncata
65	North	77.634	31.689	145	140	August	11.08.2018	Unidentified blob	NA	NA	tctttctagaaatattgcacatgctggtggttctgtagatttggctattttttctctacatcttgctggtatttcttctattttgggtgccattaattttattactactattatcaatatgcgctggtacggaatgcagtttgagcgcctatctctttttgtttgatcggtaaagattactgcagtgctattgttattatcccttcctgtattggctggggcgattactatgcttttaactgatcgtaattttaatacttctttttttgaccctgctggtggtggtgacccaattctttatcagcatttgttt	1972	100	Monostilifera	91.6	BOLD	Yes	Yes	Monostilifera 91.6 %
66	North	77.634	31.689	145	140	August	11.08.2018	Bivalve veliger	243	Anterior-posterior length	actatctgcttgattaggacatcccgcaccggctatagaatttataattttaggtctacatattgcaggtatgtcttctatttttgcaagaattaattttgtgacaacaggtgctaacatacgtcctgagggggtggcacctcagcgcactactttatttgtagtgtctgtcattattacatcatttttactagtggtggcaatacccgtgttggctgctgggttaactatgcttttaactgatcgaaattttaatacttcttttttcgatcccgtcggaggaggggatcctgtcttatttattcatctcttt	1638	99.88	Macoma calcarea	100	BLAST	Yes	Yes	Macoma calcarea
67	North	77.634	31.689	145	140	August	11.08.2018	Gastropod veliger	NA	NA	attaagtaatataggtcacataactcaaagagtagatttttgtattttttcattacatttagcaggtttatcatcaattattggggcaatcaacataattacaacaattatagtaagacgttcaaaaataataacactatctcgaataagattatatttatgaagaatattaattactttaattttattattactatccttacctgtacttgcaggtgctatcacaatactattactagatcgtaattttaacactacattttttgatcctgtaggaggaggtgatccaatcttatttcaacatctattt	93	90.32	Limacina helicina	100	BOLD	No	Yes	Limacina helicina
68	North	77.634	31.689	30	0	August	11.08.2018	Ophiopluteus	640	Posterodorsal arm	actatctgggccagtcgcccatgcaggaggatgtgttgatttagctatattttctcttcatttagctggtgcatcttcgataatggcctctataaaatttattacaacaataattaatatgcgagcacctggaatgacaatggatcgaactcctttatttgtttgatcaattttaataaccacatttcttcttttattatctcttcctgttttagctggagcaattactatgttattaacagatcgaaaaattaaaacttctttttttgatccaacaggaggaggagatccaatcttattccaacatttattt	425	98.12	Ophiura robusta	100	BOLD	Yes	Yes	Ophiura robusta
69	North	77.634	31.689	30	0	August	11.08.2018	Bivalve veliger	314	Anterior-posterior length	gttaacatcaattgaatttttaagggacccttcaatagatatagctattttttcactacatcttggcggtgtttcttctattgcggcgagtttaaatttcgcgaggacatgtgttaatatgcggcaagagggccggggcctacataaaattcctatatttccaatttccctggggatcactgctttacttttaattatcgctatgccggtgttggcgggggccctaactatactattattggatcgaaattttgcaactaggttttttgatccggtgggagggggtgatccaattttgtttatacatctattt	762	99.74	Ciliatocardium ciliatum	100	BLAST	Yes	Yes	Ciliatocardium ciliatum
70	North	77.634	31.689	30	0	August	11.08.2018	Mitraria	NA	NA	actctctggtaatgtctctcatgccggggggtctgtagatttagctattttttctttacacttagcaggtgcatcttcgattttaggtgctgttaatttcatgtgcacagtaataaatatacgatctgatgatgctgaatttgaacaaacacctttatttgtggtggctatttacttaacagtattacttctgcttttatctctacctgtactagcaggggggatcactatattgttaacagatcgaaattttaatactagattttttgacccagcaggtgggggtgacccagtgctttttgctcatttgttt	1534	97.13	Galathowenia oculata	100	BOLD	Yes	Yes	Galathowenia oculata
71	North	77.634	31.689	30	0	August	11.08.2018	Bivalve veliger	239	Anterior-posterior length	tctttcaagaaatttaatagggcattctggtgctgcgggagactttttaattttatctcttcatatcggaggtgcttcatctattatagcatccttaaatttttatagaacgtgaggaaatatgcgtgcaggatgtcatcccttccatcgtgtaccccttttttgtagttctattggggtcacaaggtttcttttaattctagctatgcctgtcttagcaggggcattaacaatactgttaacagatcgcaattttaatactgctttttttgatcctaccggtttaggggaccctatattgtttgttcatttattt	37	91.89	Mya truncata	100	BLAST	Yes	Yes	Mya truncata
72	North	77.634	31.689	30	0	August	11.08.2018	Mitraria	NA	NA	actctctggtaatgtctctcatgccggggggtctgtagatttagctattttttctttacacttagcaggtgcatcttcgattttaggtgctgttaatttcatgtgcacagtaataaatatacgatctgatgatgctgaatttgaacaaacacctttatttgtggtggctatttacttaacagtattacttctgcttttatctctacctgtactagcaggggggatcactatattgttaacagatcgaaattttaatactagattttttgacccagcaggtgggggtgacccagtgctttttgctcatttgttt	1151	99.91	Galathowenia oculata	100	BOLD	Yes	Yes	Galathowenia oculata
73	North	77.634	31.689	30	0	August	11.08.2018	Bivalve veliger	301	Anterior-posterior length	attgtcttcatacccattttctggtgcatctatagattttgtaattttctctattcatgttgctggggcttcttctattgctggagctttaaactttttaactacgggtttaaatatgcgaattaaatcaatagagttaaagcgaatacctttatttgtttgatctattattgtaactgcttttctattggtgttagcaatgcctgttttggcgggagctgttactatgcttattagggaccgtcattttaatacaactttttatgatccagcgggagggggggatcctgtattatttgtgcatctattt	1817	100	Hiatella sp. K	100	BOLD	Yes	Yes	Hiatella sp. K
74	North	77.634	31.689	30	0	August	11.08.2018	Bivalve veliger	296	Anterior-posterior length	gttaacatcaattgaatttttaagggacccttcaatagatatagctattttttcactacatcttggcggtgtttcttctattgcggcgagtttaaatttcgcgaggacatgtgttaatatgcggcaagagggccggggcctacataaaattcctatatttccaatttccctggggatcactgctttacttttaattatcgctatgccggtgttggcgggggccctaactatactattattggatcgaaattttgcaactaggttttttgatccggtgggagggggtgatccaattttgtttatacatctattt	53	90.57	Ciliatocardium ciliatum	100	BLAST	Yes	Yes	Ciliatocardium ciliatum
75	North	77.634	31.689	30	0	August	11.08.2018	Mitraria	NA	NA	actctctggtaatgtctctcatgccggggggtctgtagatttagctattttttctttacacttagcaggtgcatcttcgattttaggtgctgttaatttcatgtgcacagtaataaatatacgatctgatgatgctgaatttgaacaaacacctttatttgtggtggctatttacttaacagtattacttctgcttttatctctacctgtactagcaggggggatcactatattgttaacagatcgaaattttaatactagattttttgacccagcaggtgggggtgacccagtgctttttgctcatttgttt	959	99.79	Galathowenia oculata	100	BOLD	Yes	Yes	Galathowenia oculata
76	North	77.634	31.689	30	0	August	11.08.2018	Bivalve veliger	243	Anterior-posterior length	gttaacatcaattgaatttttaagggacccttcaatagatatagctattttttcactacatcttggcggtgtttcttctattgcggcgagtttaaatttcgcgaggacatgtgttaatatgcggcaagagggccggggcctacataaaattcctatatttccaatttccctggggatcactgctttacttttaattatcgctatgccggtgttggcgggggccctaactatactattattggatcgaaattttgcaactaggttttttgatccggtgggagggggtgatccaattttgtttatacatctattt	2556	99.96	Ciliatocardium ciliatum	100	BLAST	Yes	Yes	Ciliatocardium ciliatum
77	North	77.634	31.689	30	0	August	11.08.2018	Mitraria	NA	NA	actctctggtaatgtctctcatgccggggggtctgtagatttagctattttttctttacacttagcaggtgcatcttcgattttaggtgctgttaatttcatgtgcacagtaataaatatacgatctgatgatgctgaatttgaacaaacacctttatttgtggtggctatttacttaacagtattacttctgcttttatctctacctgtactagcaggggggatcactatattgttaacagatcgaaattttaatactagattttttgacccagcaggtgggggtgacccagtgctttttgctcatttgttt	261	93.87	Galathowenia oculata	100	BOLD	Yes	Yes	Galathowenia oculata
78	North	77.634	31.689	30	0	August	11.08.2018	Ophiopluteus	636	Posterodorsal arm	tttgtcaggccctaccgcacatgcaggaggctgcgtagacctcgcaattttttctctccacctagcaggtgcatcttcaattatggcctcaataaaatttattacaactattataaatatgcgtaggcccggcatgaccatggatcgacttccgctttttgtttgatctattttcttaacaactatattactactcctttctctgcctgttttagcaggagctattacaatgctactaactgatcgtaacataaaaacaacgttttttgatcctacaggaggaggagacccaatacttttccaacatttattt	173	89.02	Ophiopholis aculeata	100	BOLD	Yes	Yes	Ophiopholis aculeata
79	North	77.634	31.689	30	0	August	11.08.2018	Trochophore?	NA	NA	tttatctgattctaagtatcattctggaatctcagtagatttagctatttttagattacatctagctggaatctcatcaattctgggtagaattaactttataactacaattatttgttcacgtactactaaaatagtaagaatagatcgtttacctctaatgctttgatcattaggagtaacggcatttctattagttactactttaccagttttagcaggtgctattacaatgttactgactgatcgtaactttaatacatcattttttgatccttctggaggaggaaaccctgtactttatcaacacctattt	149	94.63	Synchaetidae	98.1	BOLD	No	Yes	Synchaetidae
80	North	77.634	31.689	30	0	August	11.08.2018	Unidentified blob	NA	NA	attatctagtggtacatcacactcaggaggtgctgttgacttagcaatttttagtttacacttatcaggagcttcttcaatattaggtgctattaactttatttgtactatttttaatatgcgagttaaaagtttgtcgttccacaaattacctttatttgtttgggcggtgcttatcacagcgttcttacttttattgtctttgcctgttctagcaggagctattacaatgctattgactgatcgtaattttaatactactttttttgatcctgcaggtggaggtgatcccgtgttgtatcaacatttattt	75	21.33	Chaetoceros socialis	85	BLAST	No	No	Insufficient reads
81	North	77.634	31.689	30	0	August	11.08.2018	Bivalve veliger	331	Anterior-posterior length	attgtcttcatacccattttctggtgcatctatagattttgtaattttctctattcatgttgctggggcttcttctattgctggagctttaaactttttaactacgggtttaaatatgcgaattaaatcaatagagttaaagcgaatacctttatttgtttgatctattattgtaactgcttttctattggtgttagcaatgcctgttttggcgggagctgttactatgcttattagggaccgtcattttaatacaactttttatgatccagcgggagggggggatcctgtattatttgtgcatctattt	1134	99.82	Hiatella sp. K	100	BOLD	Yes	Yes	Hiatella sp. K
82	North	77.634	31.689	30	0	August	11.08.2018	Unidentified blob	NA	NA	attgagatcttatattttccatggaggcgcttcagttgactttacaatttttagccttcacttagctggtgtttcttcacttataggggctgtaaattttattagcacagttttgaacttacgcgcattagggatacttatagatcgcatacccttatttccttgagctgtatttattactgctattttactactcctatctctccctgtacttgcaggagcaattactatactacttaccgaccgaaatttaaacacgtctttttatgatcctataggtggaggggaccctgttttataccaacatttattt	2	50	Oithona similis	100	BOLD	No	Yes	Insufficient reads
83	North	77.634	31.689	30	0	August	11.08.2018	Bivalve veliger	276	Anterior-posterior length	tctttcaagaaatttaatagggcattctggtgctgcgggagactttttaattttatctcttcatatcggaggtgcttcatctattatagcatccttaaatttttatagaacgtgaggaaatatgcgtgcaggatgtcatcccttccatcgtgtaccccttttttgtagttctattggggtcacaaggtttcttttaattctagctatgcctgtcttagcaggggcattaacaatactgttaacagatcgcaattttaatactgctttttttgatcctaccggtttaggggaccctatattgtttgttcatttattt	755	98.68	Mya truncata	100	BLAST	Yes	Yes	Mya truncata
84	North	77.634	31.689	30	0	August	11.08.2018	Bivalve veliger	317	Anterior-posterior length	actatctgcttgattaggacatcccgcaccggctatagaatttataattttaggtctacatattgcaggtatgtcttctatttttgcaagaattaattttgtgacaacaggtgctaacatacgtcctgagggggtggcacctcagcgcactactttatttgtagtgtctgtcattattacatcatttttactagtggtggcaatacccgtgttggctgctgggttaactatgcttttaactgatcgaaattttaatacttcttttttcgatcccgtcggaggaggggatcctgtcttatttattcatctcttt	2079	99.81	Macoma calcarea	100	BLAST	Yes	Yes	Macoma calcarea
85	North	77.634	31.689	30	0	August	11.08.2018	Mitraria	NA	NA	actctctggtaatgtctctcatgccggggggtctgtagatttagctattttttctttacacttagcaggtgcatcttcgattttaggtgctgttaatttcatgtgcacagtaataaatatacgatctgatgatgctgaatttgaacaaacacctttatttgtggtggctatttacttaacagtattacttctgcttttatctctacctgtactagcaggggggatcactatattgttaacagatcgaaattttaatactagattttttgacccagcaggtgggggtgacccagtgctttttgctcatttgttt	858	99.18	Galathowenia oculata	100	BOLD	Yes	Yes	Galathowenia oculata
86	North	77.634	31.689	30	0	August	11.08.2018	Bivalve veliger	254	Anterior-posterior length	attgtcttcatacccattttctggtgcatctatagattttgtaattttctctattcatgttgctggggcttcttctattgctggagctttaaactttttaactacgggtttaaatatgcgaattaaatcaatagagttaaagcgaatacctttatttgtttgatctattattgtaactgcttttctattggtgttagcaatgcctgttttggcgggagctgttactatgcttattagggaccgtcattttaatacaactttttatgatccagcgggagggggggatcctgtattatttgtgcatctattt	3157	99.71	Hiatella sp. K	100	BOLD	Yes	Yes	Hiatella sp. K
87	North	77.634	31.689	30	0	August	11.08.2018	Bivalve veliger	179	Anterior-posterior length	tctttcttcttatccattttctggggcatctatagattttgtaattttttctattcatgttgcaggtgcctcatctattgctggtgctttaaattttttaactactggacttaatatacgtattaaatctatagaattgaagcgcatgcctttgtttgtttggtcaattattgtgaccgcttttttattggttttagcaatgcctgttttagctggggctgtcactatgttaattagggatcgtcattttaatacaactttttatgatcctgctgggggaggtgatcctgtgctgtttgttcatttattt	133	99.25	Hiatella sp. I	85.3	BOLD	Yes	Yes	Hiatella sp. I 85.3 %
88	North	77.634	31.689	30	0	August	11.08.2018	Trochophore?	NA	NA	tttatctgattctaagtatcattctggaatctcagtagatttagctatttttagattacatctagctggaatctcatcaattctgggtagaattaactttataactacaattatttgttcacgtactactaaaatagtaagaatagatcgtttacctctaatgctttgatcattaggagtaacggcatttctattagttactactttaccagttttagcaggtgctattacaatgttactgactgatcgtaactttaatacatcattttttgatccttctggaggaggaaaccctgtactttatcaacacctattt	293	98.63	Synchaetidae	98.1	BOLD	No	Yes	Synchaetidae
89	North	77.47	29.97	130	79	January	10.01.2018	Limacina?	NA	NA	attaagtaatataggtcacataactcaaagagtagatttttgtattttttcattacatttagcaggtttatcatcaattattggggcaatcaacataattacaacaattatagtaagacgttcaaaaataataacactatctcgaataagattatatttatgaagaatattaattactttaattttattattactatccttacctgtacttgcaggtgctatcacaatactattactagatcgtaattttaacactacattttttgatcctgtaggaggaggtgatccaatcttatttcaacatctattt	4	50	Limacina helicina	100	BOLD	No	Yes	Insufficient reads
90	North	77.47	29.97	130	79	January	10.01.2018	Limacina?	NA	NA	No sequence	0	0	No sequence	0	No sequence	No sequence	No	Insufficient reads
91	North	77.47	29.97	130	79	January	10.01.2018	Limacina?	NA	NA	attaagtaatataggtcacataactcaaagagtagatttttgtattttttcattacatttagcaggtttatcatcaattattggggcaatcaacataattacaacaattatagtaagacgttcaaaaataataacactatctcgaataagattatatttatgaagaatattaattactttaattttattattactatccttacctgtacttgcaggtgctatcacaatactattactagatcgtaattttaacactacattttttgatcctgtaggaggaggtgatccaatcttatttcaacatctattt	14	35.71	Limacina helicina	100	BOLD	No	Yes	Insufficient reads
92	North	77.47	29.97	130	79	January	10.01.2018	Polychaete juvenile	NA	NA	actatctgggccagtcgcccatgcaggaggatgtgttgatttagctatattttctcttcatttagctggtgcatcttcgataatggcctctataaaatttattacaacaataattaatatgcgagcacctggaatgacaatggatcgaactcctttatttgtttgatcaattttaataaccacatttcttcttttattatctcttcctgttttagctggagcaattactatgttattaacagatcgaaaaattaaaacttctttttttgatccaacaggaggaggagatccaatcttattccaacatttattt	9	66.67	Ophiura robusta	100	BOLD	Yes	No	Insufficient reads
93	North	77.47	29.97	130	79	January	10.01.2018	Limacina?	NA	NA	cttgtctaatggtatttgtcattcagggccttcagttgatttagctattttttctctacacttggctgggatttcttctattctagcctctattaattttttaggtactttccgtttagcagtttctggaatttgagactacatgcgagttcctttgtttgtatggtctattgttgtaactacaggtcttttattgttagctttgcccgttttagccggctgtcttactatgttgttaacagaccgtaatataaatactactttttttgatcctgctggagggggggaccctgttttattccaaggcctattc	5797	99.83	No match	0	No match	No match	No	Unknown
94	North	77.47	29.97	130	79	January	10.01.2018	Limacina?	NA	NA	ttaagtggaaatatggcccactccggaccatctgttgattttgctattttttctctccatttagctggtgtgtcatctttactaggggcagttaattttattagaacatttggcaatttacgtgggctaggaatacaattagaccaaactcctctttttgcatggtctgtattgattactactattttattattactatccttgccagttttagctggggctattactatattattaacagaccgaaacttaaatacgtccttttacgacacaggtggaggaggcgaccctattctttaccaacatttattt	16	50	Triconia borealis	99.3	BOLD	No	No	Insufficient reads
95	North	77.47	29.97	130	79	January	10.01.2018	Limacina?	NA	NA	ttatctagtattcaaacgcattcgggaggggcggtcgacatggccatttttagccttcatttagcgggtgcttcttctatattaggggcaatgaattttataacgaccatatttaatatgagagcgccagggttgaccatggacagacttccattatttgtgtggtctattttaattactgcctttttattgttgctttctttacctgttttagcaggggctattactatgcttttaacagatagaaattttaatacgactttctttgatccggccgggggtggagaccctattttattccaacatttattt	39	61.54	Hormathia digitata	100	BOLD	Yes	No	Insufficient reads
96	North	77.47	29.97	130	79	January	10.01.2018	Limacina?	NA	NA	attaagtaatataggtcacataactcaaagagtagatttttgtattttttcattacatttagcaggtttatcatcaattattggggcaatcaacataattacaacaattatagtaagacgttcaaaaataataacactatctcgaataagattatatttatgaagaatattaattactttaattttattattactatccttacctgtacttgcaggtgctatcacaatactattactagatcgtaattttaacactacattttttgatcctgtaggaggaggtgatccaatcttatttcaacatctattt	24	50	Limacina helicina	100	BOLD	No	Yes	Insufficient reads
97	North	77.47	29.97	130	79	January	10.01.2018	Limacina?	NA	NA	tctctccagaaaaattgcccacgcaggaggctcagtagacctcgccatcttttcccttcacctcgctggtgcctcttccatcctagcttccattaactttattacaactgtaataaaaatgcgaacccctggtattacttttgatcgtctacctctatttgtctgatctgtctttataactgcttttcttctactattaagactgccagtcctagcaggagcaataactatgttacttactgaccgaaatataaaaactaccttctttgacccagcaggtggaggagaccctgtattatttcaacacctattc	36	83.33	Molpadia borealis	99.7	BOLD	Yes	No	Unknown
98	North	77.47	29.97	130	79	January	10.01.2018	Cyphonaute	NA	NA	attaagtaatataggtcacataactcaaagagtagatttttgtattttttcattacatttagcaggtttatcatcaattattggggcaatcaacataattacaacaattatagtaagacgttcaaaaataataacactatctcgaataagattatatttatgaagaatattaattactttaattttattattactatccttacctgtacttgcaggtgctatcacaatactattactagatcgtaattttaacactacattttttgatcctgtaggaggaggtgatccaatcttatttcaacatctattt	4	75	Limacina helicina	100	BOLD	No	No	Insufficient reads
99	North	77.47	29.97	130	79	January	10.01.2018	Limacina?	NA	NA	attaagtaatataggtcacataactcaaagagtagatttttgtattttttcattacatttagcaggtttatcatcaattattggggcaatcaacataattacaacaattatagtaagacgttcaaaaataataacactatctcgaataagattatatttatgaagaatattaattactttaattttattattactatccttacctgtacttgcaggtgctatcacaatactattactagatcgtaattttaacactacattttttgatcctgtaggaggaggtgatccaatcttatttcaacatctattt	7	57.14	Limacina helicina	100	BOLD	No	Yes	Insufficient reads
100	North	77.47	29.97	130	79	January	10.01.2018	Limacina?	NA	NA	attgtcttcatacccattttctggtgcatctatagattttgtaattttctctattcatgttgctggggcttcttctattgctggagctttaaactttttaactacgggtttaaatatgcgaattaaatcaatagagttaaagcgaatacctttatttgtttgatctattattgtaactgcttttctattggtgttagcaatgcctgttttggcgggagctgttactatgcttattagggaccgtcattttaatacaactttttatgatccagcgggagggggggatcctgtattatttgtgcatctattt	2	50	Hiatella sp. K	100	BOLD	Yes	No	Insufficient reads
101	North	77.47	29.97	130	79	January	10.01.2018	Limacina?	NA	NA	tctgagttcttatatttttcacgggggagcatctgtggactttacaatttttagcctccacctagccggagtctcttctctcctgggggcagtaaactttattagcacggttttaaatttacgggcattaggtatgttaatagatcgcatacctttattcccatgggcagtatttattactgctattctgcttcttttgtcacttcccgttttagcaggagctatcactatactcttgacagatcgaaatttaaacacgtctttttatgatcctataggcgggggtgaccctgtcctctatcagcacttgttt	2574	89.94	Oithona similis	100	BOLD	No	No	Unknown
102	North	77.47	29.97	130	79	January	10.01.2018	Limacina?	NA	NA	attgtcttcatacccattttctggtgcatctatagattttgtaattttctctattcatgttgctggggcttcttctattgctggagctttaaactttttaactacgggtttaaatatgcgaattaaatcaatagagttaaagcgaatacctttatttgtttgatctattattgtaactgcttttctattggtgttagcaatgcctgttttggcgggagctgttactatgcttattagggaccgtcattttaatacaactttttatgatccagcgggagggggggatcctgtattatttgtgcatctattt	2	50	Hiatella sp. K	100	BOLD	Yes	No	Insufficient reads
103	North	77.47	29.97	130	79	January	10.01.2018	Limacina?	NA	NA	gctagcaagaaatatttctcatagaggaagatctgttgaccttgcaatcttctcccttcatctggcaggtgcttcttctattctaggagctattaattttataactactattattaacatgcgaagatcgtcaataacttttgctcggatacccctattcatctgatccgtatttattacagctattttactggtcctttccttaccagtcctagcgggtgcaattacaatacttctcacggaccgtaatttaaataccacttttttcgaccctgctgggggaggggatcccatcctataccaacacttattt	200	99	Alcyonidium mamillatum	99.4	BLAST	Yes	No	Unknown
104	North	77.47	29.97	130	79	January	10.01.2018	Limacina?	NA	NA	attaagtacttctttgatgagtttatcaccagtgacgatagatcttattatagatggtttattgattaatggtatatcttcttttttttcatctttgaattttatgggaaccattagtaatatgcgtttatcaggatttattttattatcattattttcttgcgggatcttaattactgctctcttactattattaactctaccgatcttaaccggtgctttaggaatgttattaggagatcttcatttcaatacagtttattttgattccggttttggaggggatccggtattatatcaacatttcttt	8	50	No match	0	No match	No match	No	Insufficient reads
105	North	77.47	29.97	130	79	January	10.01.2018	Limacina?	NA	NA	ttaagtggaaatatggcccactccggaccatctgttgattttgctattttttctctccatttagctggtgtgtcatctttactaggggcagttaattttattagaacatttggcaatttacgtgggctaggaatacaattagaccaaactcctctttttgcatggtctgtattgattactactattttattattactatccttgccagttttagctggggctattactatattattaacagaccgaaacttaaatacgtccttttacgacacaggtggaggaggcgaccctattctttaccaacatttattt	7	100	Triconia borealis	99.3	BOLD	No	No	Insufficient reads
106	North	77.47	29.97	130	79	January	10.01.2018	Limacina?	NA	NA	tatcaagtaatattgcacatgcgggggcttctgtggattttgctatcttctccctgcacttagccggagttagctcgatcttgggtgctgtaaattttattagtactttggggaaccttcgtgtgtttggtatacttttagaccgtatgccactatttgcttgggcggtactcattaccgctgtccttctcctattatcattacccgtcctagcaggagctatcaccatattattaacagatcgaaacctaaatacgaccttctatgacgtggggggggggagatcctatcttataccagcacctattt	10	60	Calanus glacialis	100	BOLD	No	No	Insufficient reads
107	North	77.47	29.97	130	79	January	10.01.2018	Limacina?	NA	NA	attatccagaaatattgctcatgcaggagggtcagtagattttgctattttttctttacatttagcaggtgttagatctattttaggtgctgtaaattttattagcacattaggtaatttacgagtatttggtatactcctagaccaaatacctttgtttgcgtggtctgtattagtcacagccatccttttattactatccttaccagtattagctggggctattactatattgttgacagatcgtaacttaaacacatcattttatgatgtagggggtggtggggatcctatcttataccaacatttgttt	2	100	Pseudocalanus minutus	100	BOLD	No	No	Insufficient reads
108	North	77.47	29.97	130	79	January	10.01.2018	Limacina?	NA	NA	actatctgggccagtcgcccatgcaggaggatgtgttgatttagctatattttctcttcatttagctggtgcatcttcgataatggcctctataaaatttattacaacaataattaatatgcgagcacctggaatgacaatggatcgaactcctttatttgtttgatcaattttaataaccacatttcttcttttattatctcttcctgttttagctggagcaattactatgttattaacagatcgaaaaattaaaacttctttttttgatccaacaggaggaggagatccaatcttattccaacatttattt	4	50	Ophiura robusta	100	BOLD	Yes	No	Insufficient reads
109	North	77.47	29.97	130	79	January	10.01.2018	Limacina?	NA	NA	attaagtaatataggtcacataactcaaagagtagatttttgtattttttcattacatttagcaggtttatcatcaattattggggcaatcaacataattacaacaattatagtaagacgttcaaaaataataacactatctcgaataagattatatttatgaagaatattaattactttaattttattattactatccttacctgtacttgcaggtgctatcacaatactattactagatcgtaattttaacactacattttttgatcctgtaggaggaggtgatccaatcttatttcaacatctattt	5	80	Limacina helicina	100	BOLD	No	Yes	Insufficient reads
110	North	77.47	29.97	130	79	January	10.01.2018	Limacina?	NA	NA	gttgagcactgtgggccatagagggggcgctgtggatttgggtatcttctccttacaccttgctggcgttagaagaatcttggggagagctaattttattaccaccatctctaatataaaaggtgaaggcatatctatagaacttatgcctttattcgtgtgggcggtgctcctcacagctatcttacttttgctctctcttcctgtattagctggtgctattactatgttactaacagaccgtaattttaacacctctttctttgaccctgctggtggcggggacccgattttataccaacacctattt	21	76.19	Sagitta elegans	94.2	BLAST	No	No	Unknown
111	North	77.47	29.97	130	79	January	10.01.2018	Limacina?	NA	NA	gttgagcactgtgggccatagagggggcgctgtggatttgggtatcttctccttacaccttgctggcgttagaagaatcttggggagagctaattttattaccaccatctctaatataaaaggtgaaggcatatctatagaacttatgcctttattcgtgtgggcggtgctcctcacagctatcttacttttgctctctcttcctgtattagctggtgctattactatgttactaacagaccgtaattttaacacctctttctttgaccctgctggtggcggggacccgattttataccaacacctattt	10	60	Sagitta elegans	94.2	BLAST	No	No	Insufficient reads
112	North	77.47	29.97	130	79	January	10.01.2018	Bivalve veliger	169	Anterior-posterior length	attgtcttcatacccattttctggtgcatctatagattttgtaattttctctattcatgttgctggggcttcttctattgctggagctttaaactttttaactacgggtttaaatatgcgaattaaatcaatagagttaaagcgaatacctttatttgtttgatctattattgtaactgcttttctattggtgttagcaatgcctgttttggcgggagctgttactatgcttattagggaccgtcattttaatacaactttttatgatccagcgggagggggggatcctgtattatttgtgcatctattt	66	100	Hiatella sp. K	100	BOLD	Yes	Yes	Hiatella sp. K
113	North	77.47	29.97	130	79	January	10.01.2018	Limacina?	NA	NA	actatctgggccagtcgcccatgcaggaggatgtgttgatttagctatattttctcttcatttagctggtgcatcttcgataatggcctctataaaatttattacaacaataattaatatgcgagcacctggaatgacaatggatcgaactcctttatttgtttgatcaattttaataaccacatttcttcttttattatctcttcctgttttagctggagcaattactatgttattaacagatcgaaaaattaaaacttctttttttgatccaacaggaggaggagatccaatcttattccaacatttattt	6	50	Ophiura robusta	100	BOLD	Yes	No	Insufficient reads
114	North	77.47	29.97	130	79	January	10.01.2018	Limacina?	NA	NA	gttgagcactgtgggccatagagggggcgctgtggatttgggtatcttctccttacaccttgctggcgttagaagaatcttggggagagctaattttattaccaccatctctaatataaaaggtgaaggcatatctatagaacttatgcctttattcgtgtgggcggtgctcctcacagctatcttacttttgctctctcttcctgtattagctggtgctattactatgttactaacagaccgtaattttaacacctctttctttgaccctgctggtggcggggacccgattttataccaacacctattt	21	61.9	Sagitta elegans	94.2	BLAST	No	No	Insufficient reads
115	North	77.47	29.97	130	79	January	10.01.2018	Unidentified blob	NA	NA	cttgccggcaacatgtctcacgctggcccctcagtagacttagcaattttttctctccacctcgccggcatcagttccatcctaggagccctaaattttatctctactattataaacatgcgaggaaagggcatacgactcgaacgaatccccctatttgtatgagcagtggaaatcacagcaattctccttcttctctccctccccgtacttgctggagccatcacgatacttctcactgaccgaaacctaaacaccgcattttttgacccctctggaggcggggacccggttctctttatacacctcttc	5033	99.84	Schistomeringos nr. rudolphii	99.7	BOLD	Yes	Yes	Schistomeringos nr. rudolphii
116	North	77.47	29.97	130	79	January	10.01.2018	Polychaete juvenile	NA	NA	cttgtctaatggtatttgtcattcagggccttcagttgatttagctattttttctctacacttggctgggatttcttctattctagcctctattaattttttaggtactttccgtttagcagtttctggaatttgagactacatgcgagttcctttgtttgtatggtctattgttgtaactacaggtcttttattgttagctttgcccgttttagccggctgtcttactatgttgttaacagaccgtaatataaatactactttttttgatcctgctggagggggggaccctgttttattccaaggcctattc	13063	99.97	No match	0	No match	No match	No	Unknown
117	North	77.47	29.97	130	79	January	10.01.2018	Limacina?	NA	NA	tctcgcctctaatattgcccatgctggtccttccgtagatctagctattttttcacttcatattgcgggagtctcttctattttaggagctcttaattttattactactgttgttaatatgcgatataaagggttacgacttgagcgtgttcctttatttgtatgagcagctaaaattacggcaattcttttattactctccttaccagttctagcaggagctattactatacttttaactgaccgtaacctaaatactgccttctttgatccagcaggaggaggagaccctgtattataccaacacctattt	16	56.25	Gattyana cirrhosa	100	BOLD	Yes	No	Insufficient reads
118	North	77.47	29.97	130	79	January	10.01.2018	Limacina?	NA	NA	attaagtaatataggtcacataactcaaagagtagatttttgtattttttcattacatttagcaggtttatcatcaattattggggcaatcaacataattacaacaattatagtaagacgttcaaaaataataacactatctcgaataagattatatttatgaagaatattaattactttaattttattattactatccttacctgtacttgcaggtgctatcacaatactattactagatcgtaattttaacactacattttttgatcctgtaggaggaggtgatccaatcttatttcaacatctattt	16	43.75	Limacina helicina	100	BOLD	No	Yes	Insufficient reads
119	North	77.47	29.97	130	79	January	10.01.2018	Gastropod veliger	NA	NA	tctttcgggggctattggacatggaggctgttctgttgatttggctattttttctttacatttggcaggtatatcttctcttctaggtgcaattaattttattactactatttttaatatgcggtctccagcaatgactttggatcgtctaagattgtttgtatggtctgtcttggtcactgctttcttgcttttgctttccttacctgttttggccggagcaattactatgttgttaactgaccgtaattttaatactagattttttgacccggctggtggtggagatcctattttgtaccaacatttattt	608	99.18	Dendronotus patricki	100	BLAST	Yes	Yes	Dendronotus patricki
120	North	77.47	29.97	130	79	January	10.01.2018	Limacina?	NA	NA	tttatctagaaatttagctcattctggtccttcagttgatatagctattttttcattacatatagcaggtgtttcttctattttgggagcaattaattttattgtaactattatatttaatcgtgtaattggtataagatttaaacgtattcctttatttgtttggtctgtattaattactgctattttattattattagcattacctgttttagcgggtgtaattactatattgttaactgatcgtaatttaaatactagattttttgatccagcaggaggaggagatcctattttatttcaacatttattt	7	57.14	Sphaerodorum flavum	100	BOLD	Yes	No	Insufficient reads
121	North	77.47	29.97	130	79	January	10.01.2018	Limacina?	NA	NA	tttgtcttctttaataggttcacctagtatatctgtagattttttaatttttgccttacatttagctgggtttagttctatattagctagtataaatttttttatttctattgtttgtttaattaatttaaatgaattttttagattaaatttatttttatttggtaatttagtcgtagcttttttattgtttatatctttacctgttttagctggagctattactttgttactttttgatagaaattttaatactgttttttatgatttaaataacggaggtgatgtagttttattccaacatttattt	13	76.92	No match	0	No match	No match	No	Unknown
122	North	77.47	29.97	130	79	January	10.01.2018	Gastropod veliger	NA	NA	cttgagaagtgcaggtcatgtaacacaaagtgttgatttttgtattttttctctacatttagcaggactttcttcaatcattggagcaatcaatataattacaacaattctaattagtcgacgggtaagactatctcgaataagtttatacttatgaagcatactcatcacattaattttacttttattatcattaccggttttagcaggtgcaattactatactgttaatagaccgtaattttaatacaactttttttgatcctgtaggagggggtgatcctgtattatttcaacatttattt	2178	96.33	Limacina retroversa	96.9	BOLD	No	Yes	Limacina retroversa 96.9 %
123	North	77.47	29.97	130	79	January	10.01.2018	Limacina?	NA	NA	attaagtaatataggtcacataactcaaagagtagatttttgtattttttcattacatttagcaggtttatcatcaattattggggcaatcaacataattacaacaattatagtaagacgttcaaaaataataacactatctcgaataagattatatttatgaagaatattaattactttaattttattattactatccttacctgtacttgcaggtgctatcacaatactattactagatcgtaattttaacactacattttttgatcctgtaggaggaggtgatccaatcttatttcaacatctattt	7	57.14	Limacina helicina	100	BOLD	No	Yes	Insufficient reads
124	North	77.47	29.97	130	79	January	10.01.2018	Limacina?	NA	NA	actaagatcgttagtaggacataacaaccactctgttgatctggctattttttctttacacttagctggtattaggtctattttaggtgcagtaaattttattactactatcttaaatatacgagcccctggagttagctgagaacgactatctctatttgtgtggtctcttttagtaacaacagttcttctacttttatctcttcctgtattggcaggagctatcactatactcctcactgaccgtaatttcaacacagggttctttgaccctggggccggtggagaccctatcttatttcaacatttattt	51	54.9	Clione limacina	99.7	BOLD	No	No	Insufficient reads
125	North	77.47	29.97	130	79	January	10.01.2018	Limacina?	NA	NA	tttgtcttctttaataggttcacctagtatatctgtagattttttaatttttgccttacatttagctgggtttagttctatattagctagtataaatttttttatttctattgtttgtttaattaatttaaatgaattttttagattaaatttatttttatttggtaatttagtcgtagcttttttattgtttatatctttacctgttttagctggagctattactttgttactttttgatagaaattttaatactgttttttatgatttaaataacggaggtgatgtagttttattccaacatttattt	13	38.46	No match	0	No match	No match	No	Insufficient reads
126	North	77.47	29.97	130	79	January	10.01.2018	Limacina?	NA	NA	tttatcatctattgcagcccattcgggaggtgcagtagatttagctatttttagtcttcacctttctggtgcaagtagtattcttggtgctgtaaattttattaccaccattttaaatatgcgtgctcctggtatgactatgcatagacttcctttattcgtatggtcagtattaattacagctgtattactcctattatcactcccagttttagcaggtgcaattactatgcttttaactgatcgaaatttcaatacaagtttctttgatcctgcaggtggaggagatcccattttattccaacacttattc	2	100	Pterosperma cristatum	84.5	BLAST	No	No	Insufficient reads
127	North	77.47	29.97	130	79	January	10.01.2018	Limacina?	NA	NA	tttgtctagaaatgtggctcattcagggccttctgtagatttggctattttttctttacatttagcaggggtatcttctattcttgcgtcaattaactttattactaccgcaatgaatatgcgttctagaggtcttcggttagagcgtgtgccgttgtttgtgtggtctgtggctattactgctttacttcttttgttatctttgcctgttcttgcgggagctattacaatattgttaactgatcgaaacttaaatacatctttttttgatcctgccggaggtggagatcctattttgtatcaacatcttttt	22	40.91	Phyllodoce groenlandica	100	BOLD	Yes	No	Insufficient reads
128	North	77.47	29.97	130	79	January	10.01.2018	Limacina?	NA	NA	tatcaagtaatattgcacatgcgggggcttctgtggattttgctatcttctccctgcacttagccggagttagctcgatcttgggtgctgtaaattttattagtactttggggaaccttcgtgtgtttggtatacttttagaccgtatgccactatttgcttgggcggtactcattaccgctgtccttctcctattatcattacccgtcctagcaggagctatcaccatattattaacagatcgaaacctaaatacgaccttctatgacgtggggggggggagatcctatcttataccagcacctattt	6	66.67	Calanus glacialis	100	BOLD	No	No	Insufficient reads
129	North	77.47	29.97	80	0	January	10.01.2018	Cyphonaute	NA	NA	gctagcaagaaatatttctcatagaggaagatctgttgaccttgcaatcttctcccttcatctggcaggtgcttcttctattctaggagctattaattttataactactattattaacatgcgaagatcgtcaataacttttgctcggatacccctattcatctgatccgtatttattacagctattttactggtcctttccttaccagtcctagcgggtgcaattacaatacttctcacggaccgtaatttaaataccacttttttcgaccctgctgggggaggggatcccatcctataccaacacttattt	5923	99.56	Alcyonidium mamillatum	99.4	BLAST	Yes	Yes	Alcyonidium mamillatum
130	North	77.47	29.97	80	0	January	10.01.2018	Bivalve veliger	206	Anterior-posterior length	attgtcttcatacccattttctggtgcatctatagattttgtaattttctctattcatgttgctggggcttcttctattgctggagctttaaactttttaactacgggtttaaatatgcgaattaaatcaatagagttaaagcgaatacctttatttgtttgatctattattgtaactgcttttctattggtgttagcaatgcctgttttggcgggagctgttactatgcttattagggaccgtcattttaatacaactttttatgatccagcgggagggggggatcctgtattatttgtgcatctattt	623	99.84	Hiatella sp. K	100	BOLD	Yes	Yes	Hiatella sp. K
131	North	77.47	29.97	80	0	January	10.01.2018	clione trochophore?	NA	NA	actaagatcgttagtaggacataacaaccactctgttgatctggctattttttctttacacttagctggtattaggtctattttaggtgcagtaaattttattactactatcttaaatatacgagcccctggagttagctgagaacgactatctctatttgtgtggtctcttttagtaacaacagttcttctacttttatctcttcctgtattggcaggagctatcactatactcctcactgaccgtaatttcaacacagggttctttgaccctggggccggtggagaccctatcttatttcaacatttattt	6394	99.86	Clione limacina	99.7	BOLD	No	Yes	Clione limacina
132	North	77.47	29.97	80	0	January	10.01.2018	Gastropod veliger	NA	NA	attaagtaatataggtcacataactcaaagagtagatttttgtattttttcattacatttagcaggtttatcatcaattattggggcaatcaacataattacaacaattatagtaagacgttcaaaaataataacactatctcgaataagattatatttatgaagaatattaattactttaattttattattactatccttacctgtacttgcaggtgctatcacaatactattactagatcgtaattttaacactacattttttgatcctgtaggaggaggtgatccaatcttatttcaacatctattt	53	98.11	Limacina helicina	100	BOLD	No	Yes	Limacina helicina
133	North	77.47	29.97	80	0	January	10.01.2018	Gastropod veliger	NA	NA	tctttcaggtgcaattgggcacggggggtgttcggtagacttggcaattttttctttacatttagcagggatgtcttctttgttgggtgctattaattttattactaccatttttaacatacgctctccggaaataacaatagatcggttaagtttatttgtttgatcagttctggttactgcttttcttttattactctctcttcctgtattagctggggctattactatgcttttaactgatcgtaattttaatactaggtttttcgatcctgccggagggggggatcctatcttataccagcatttattt	6172	99.47	Chlamylla borealis	99.3	BOLD	Yes	Yes	Chlamylla borealis
134	North	77.47	29.97	80	0	January	10.01.2018	Limacina?	NA	NA	attaagtaatataggtcacataactcaaagagtagatttttgtattttttcattacatttagcaggtttatcatcaattattggggcaatcaacataattacaacaattatagtaagacgttcaaaaataataacactatctcgaataagattatatttatgaagaatattaattactttaattttattattactatccttacctgtacttgcaggtgctatcacaatactattactagatcgtaattttaacactacattttttgatcctgtaggaggaggtgatccaatcttatttcaacatctattt	159	89.94	Limacina helicina	100	BOLD	No	Yes	Limacina helicina
135	North	77.47	29.97	80	0	January	10.01.2018	Bivalve veliger	257	Anterior-posterior length	tctttcaagaaatttaatagggcattctggtgctgcgggagactttttaattttatctcttcatatcggaggtgcttcatctattatagcatccttaaatttttatagaacgtgaggaaatatgcgtgcaggatgtcatcccttccatcgtgtaccccttttttgtagttctattggggtcacaaggtttcttttaattctagctatgcctgtcttagcaggggcattaacaatactgttaacagatcgcaattttaatactgctttttttgatcctaccggtttaggggaccctatattgtttgttcatttattt	131	86.26	Mya truncata	100	BLAST	Yes	Yes	Mya truncata
136	North	77.47	29.97	80	0	January	10.01.2018	Limacina?	NA	NA	tctgagttcttatatttttcacgggggagcatctgtggactttacaatttttagcctccacctagccggagtctcttctctcctgggggcagtaaactttattagcacggttttaaatttacgggcattaggtatgttaatagatcgcatacctttattcccatgggcagtatttattactgctattctgcttcttttgtcacttcccgttttagcaggagctatcactatactcttgacagatcgaaatttaaacacgtctttttatgatcctataggcgggggtgaccctgtcctctatcagcacttgttt	1787	75.38	Oithona similis	100	BOLD	No	No	Unknown
137	North	77.47	29.97	80	0	January	10.01.2018	Gastropod veliger	NA	NA	ttatcaggtccggtagctcacgcaggtggttgtgtagatttagcaatattttctttacatttagctggtgcttcttctataatggcctcaataaattttataactacaataattaatatgcgagctcccggtatgacaatggaccgagtccctttatttgtttgatcaatttttattacaacttttttattattattatctttaccagttttagctggtgcaattacaatgttattaactgaccgtaatataaaaacttccttttttgatccaacaggaggaggagacccaatattattccaacacttgttc	2	50	Ophiocten gracilis	100	BOLD	Yes	No	Insufficient reads
138	North	77.47	29.97	80	0	January	10.01.2018	Limacina?	NA	NA	attgtcagatctaacatctcactctggtggttccgtggaccttgctattttcagtcttcacgtatctggtgcaagtagtattcttggtgcagttaattttattactactgtaatcaatatgagaggcccaggtatgacaatgcatagattgcctctgttcgcatgggctgttctattgaccgcaattctattgcttctagctctacctgttctagctggtgcaattactatgctactaactgatcgaaacttcaatactagtttctttgatccagcaggtggaggtgatccaattctattccaacacttgttt	21	42.86	Chloroparvula pacifica	99.4	BLAST	No	No	Insufficient reads
139	North	77.47	29.97	80	0	January	10.01.2018	Bivalve veliger	195	Anterior-posterior length	attgtcttcatacccattttctggtgcatctatagattttgtaattttctctattcatgttgctggggcttcttctattgctggagctttaaactttttaactacgggtttaaatatgcgaattaaatcaatagagttaaagcgaatacctttatttgtttgatctattattgtaactgcttttctattggtgttagcaatgcctgttttggcgggagctgttactatgcttattagggaccgtcattttaatacaactttttatgatccagcgggagggggggatcctgtattatttgtgcatctattt	1981	99.29	Hiatella sp. K	100	BOLD	Yes	Yes	Hiatella sp. K
140	North	77.47	29.97	80	0	January	10.01.2018	Gastropod veliger	NA	NA	attaagtaatataggtcacataactcaaagagtagatttttgtattttttcattacatttagcaggtttatcatcaattattggggcaatcaacataattacaacaattatagtaagacgttcaaaaataataacactatctcgaataagattatatttatgaagaatattaattactttaattttattattactatccttacctgtacttgcaggtgctatcacaatactattactagatcgtaattttaacactacattttttgatcctgtaggaggaggtgatccaatcttatttcaacatctattt	4	75	Limacina helicina	100	BOLD	No	Yes	Insufficient reads
141	North	77.47	29.97	80	0	January	10.01.2018	Gastropod veliger	NA	NA	tttgtcaggccctaccgcacatgcaggaggctgcgtagacctcgcaattttttctctccacctagcaggtgcatcttcaattatggcctcaataaaatttattacaactattataaatatgcgtaggcccggcatgaccatggatcgacttccgctttttgtttgatctattttcttaacaactatattactactcctttctctgcctgttttagcaggagctattacaatgctactaactgatcgtaacataaaaacaacgttttttgatcctacaggaggaggagacccaatacttttccaacatttattt	12	75	Ophiopholis aculeata	100	BOLD	Yes	No	Unknown
142	North	77.47	29.97	80	0	January	10.01.2018	clione trochophore?	NA	NA	actaagatcgttagtaggacataacaaccactctgttgatctggctattttttctttacacttagctggtattaggtctattttaggtgcagtaaattttattactactatcttaaatatacgagcccctggagttagctgagaacgactatctctatttgtgtggtctcttttagtaacaacagttcttctacttttatctcttcctgtattggcaggagctatcactatactcctcactgaccgtaatttcaacacagggttctttgaccctggggccggtggagaccctatcttatttcaacatttattt	6686	99.84	Clione limacina	99.7	BOLD	No	Yes	Clione limacina
143	North	77.47	29.97	80	0	January	10.01.2018	Polychaete juvenile	NA	NA	tttgtctagaaatgtggctcattcagggccttctgtagatttggctattttttctttacatttagcaggggtatcttctattcttgcgtcaattaactttattactaccgcaatgaatatgcgttctagaggtcttcggttagagcgtgtgccgttgtttgtgtggtctgtggctattactgctttacttcttttgttatctttgcctgttcttgcgggagctattacaatattgttaactgatcgaaacttaaatacatctttttttgatcctgccggaggtggagatcctattttgtatcaacatcttttt	8049	99.99	Phyllodoce groenlandica	100	BOLD	Yes	Yes	Phyllodoce groenlandica
144	North	77.47	29.97	80	0	January	10.01.2018	Gastropod veliger	NA	NA	attaagtaatataggtcacataactcaaagagtagatttttgtattttttcattacatttagcaggtttatcatcaattattggggcaatcaacataattacaacaattatagtaagacgttcaaaaataataacactatctcgaataagattatatttatgaagaatattaattactttaattttattattactatccttacctgtacttgcaggtgctatcacaatactattactagatcgtaattttaacactacattttttgatcctgtaggaggaggtgatccaatcttatttcaacatctattt	55	76.36	Limacina helicina	100	BOLD	No	Yes	Limacina helicina
145	North	77.47	29.97	80	0	January	10.01.2018	Gastropod veliger	NA	NA	attaagtaatataggtcacataactcaaagagtagatttttgtattttttcattacatttagcaggtttatcatcaattattggggcaatcaacataattacaacaattatagtaagacgttcaaaaataataacactatctcgaataagattatatttatgaagaatattaattactttaattttattattactatccttacctgtacttgcaggtgctatcacaatactattactagatcgtaattttaacactacattttttgatcctgtaggaggaggtgatccaatcttatttcaacatctattt	10	60	Limacina helicina	100	BOLD	No	Yes	Insufficient reads
146	North	77.47	29.97	80	0	January	10.01.2018	clione trochophore?	NA	NA	tttagccaggggtattgctcattcagggggttctgtggatttggctattttttctttacacttagcaggagcgtcgtcaattttaggcgctattaattttattactactgttatgaatatgcggaggcgaggtatacaacttgaaaccctgcctctttttgtttggtcagtaaaaattactgctattttgttgttactttctcttcccgtgttagccggggccattactatgttattaactgatcgaaattttaatacatctttttttgatccggcaggggggggtgatcctattttatatcagcatttattt	4879	100	Heteronemertea	88.1	BOLD	Yes	Yes	Heteronemertea 88.1 %
147	North	77.47	29.97	80	0	January	10.01.2018	Bivalve veliger	176	Anterior-posterior length	attgtcttcatacccattttctggtgcatctatagattttgtaattttctctattcatgttgctggggcttcttctattgctggagctttaaactttttaactacgggtttaaatatgcgaattaaatcaatagagttaaagcgaatacctttatttgtttgatctattattgtaactgcttttctattggtgttagcaatgcctgttttggcgggagctgttactatgcttattagggaccgtcattttaatacaactttttatgatccagcgggagggggggatcctgtattatttgtgcatctattt	3249	99.94	Hiatella sp. K	100	BOLD	Yes	Yes	Hiatella sp. K
148	North	77.47	29.97	80	0	January	10.01.2018	Bivalve veliger	311	Anterior-posterior length	tctttcaagaaatttaatagggcattctggtgctgcgggagactttttaattttatctcttcatatcggaggtgcttcatctattatagcatccttaaatttttatagaacgtgaggaaatatgcgtgcaggatgtcatcccttccatcgtgtaccccttttttgtagttctattggggtcacaaggtttcttttaattctagctatgcctgtcttagcaggggcattaacaatactgttaacagatcgcaattttaatactgctttttttgatcctaccggtttaggggaccctatattgtttgttcatttattt	1328	99.1	Mya truncata	100	BLAST	Yes	Yes	Mya truncata
149	North	77.47	29.97	80	0	January	10.01.2018	Polychaete juvenile	NA	NA	cttgtctaatggtatttgtcattcagggccttcagttgatttagctattttttctctacacttggctgggatttcttctattctagcctctattaattttttaggtactttccgtttagcagtttctggaatttgagactacatgcgagttcctttgtttgtatggtctattgttgtaactacaggtcttttattgttagctttgcccgttttagccggctgtcttactatgttgttaacagaccgtaatataaatactactttttttgatcctgctggagggggggaccctgttttattccaaggcctattc	12780	99.98	No match	0	No match	No match	No	Unknown
150	North	77.47	29.97	80	0	January	10.01.2018	Polychaete juvenile	NA	NA	tttgtctagaaatgtggctcattcagggccttctgtagatttggctattttttctttacatttagcaggggtatcttctattcttgcgtcaattaactttattactaccgcaatgaatatgcgttctagaggtcttcggttagagcgtgtgccgttgtttgtgtggtctgtggctattactgctttacttcttttgttatctttgcctgttcttgcgggagctattacaatattgttaactgatcgaaacttaaatacatctttttttgatcctgccggaggtggagatcctattttgtatcaacatcttttt	3990	99.95	Phyllodoce groenlandica	100	BOLD	Yes	Yes	Phyllodoce groenlandica
151	North	77.47	29.97	80	0	January	10.01.2018	Polychaete juvenile	NA	NA	tttgtctagaaatgtggctcattcagggccttctgtagatttggctattttttctttacatttagcaggggtatcttctattcttgcgtcaattaactttattactaccgcaatgaatatgcgttctagaggtcttcggttagagcgtgtgccgttgtttgtgtggtctgtggctattactgctttacttcttttgttatctttgcctgttcttgcgggagctattacaatattgttaactgatcgaaacttaaatacatctttttttgatcctgccggaggtggagatcctattttgtatcaacatcttttt	7225	99.97	Phyllodoce groenlandica	100	BOLD	Yes	Yes	Phyllodoce groenlandica
152	North	77.47	29.97	80	0	January	10.01.2018	Gastropod veliger	NA	NA	attgtcttcatacccattttctggtgcatctatagattttgtaattttctctattcatgttgctggggcttcttctattgctggagctttaaactttttaactacgggtttaaatatgcgaattaaatcaatagagttaaagcgaatacctttatttgtttgatctattattgtaactgcttttctattggtgttagcaatgcctgttttggcgggagctgttactatgcttattagggaccgtcattttaatacaactttttatgatccagcgggagggggggatcctgtattatttgtgcatctattt	1	100	Hiatella sp. K	100	BOLD	Yes	No	Insufficient reads
153	North	77.47	29.97	80	0	January	10.01.2018	Gastropod veliger	NA	NA	attaagtaatataggtcacataactcaaagagtagatttttgtattttttcattacatttagcaggtttatcatcaattattggggcaatcaacataattacaacaattatagtaagacgttcaaaaataataacactatctcgaataagattatatttatgaagaatattaattactttaattttattattactatccttacctgtacttgcaggtgctatcacaatactattactagatcgtaattttaacactacattttttgatcctgtaggaggaggtgatccaatcttatttcaacatctattt	7	85.71	Limacina helicina	100	BOLD	No	Yes	Insufficient reads
154	North	77.47	29.97	80	0	January	10.01.2018	Gastropod veliger	NA	NA	attaagtaatataggtcacataactcaaagagtagatttttgtattttttcattacatttagcaggtttatcatcaattattggggcaatcaacataattacaacaattatagtaagacgttcaaaaataataacactatctcgaataagattatatttatgaagaatattaattactttaattttattattactatccttacctgtacttgcaggtgctatcacaatactattactagatcgtaattttaacactacattttttgatcctgtaggaggaggtgatccaatcttatttcaacatctattt	34	73.53	Limacina helicina	100	BOLD	No	Yes	Insufficient reads
155	North	77.47	29.97	80	0	January	10.01.2018	Gastropod veliger	NA	NA	attaagtaatataggtcacataactcaaagagtagatttttgtattttttcattacatttagcaggtttatcatcaattattggggcaatcaacataattacaacaattatagtaagacgttcaaaaataataacactatctcgaataagattatatttatgaagaatattaattactttaattttattattactatccttacctgtacttgcaggtgctatcacaatactattactagatcgtaattttaacactacattttttgatcctgtaggaggaggtgatccaatcttatttcaacatctattt	77	70.13	Limacina helicina	100	BOLD	No	Yes	Insufficient reads
156	North	77.47	29.97	80	0	January	10.01.2018	Cyphonaute	NA	NA	ttagcaagaaatatttctcatagaggaaggtcagttgacttagcaattttttcccttcatttagctggtgcatcttcaattcttggggctattaactttataacaactattatcaatatgcgaaggtcttccatatctttcgctcggctacctctgttcatttgatccgtatttatcactgcgattttgctagtcctctctctgccagtattagccggtgctatcacaatacttctaacagatcggaatttaaacaccacattttttgaccctgccggagggggggaccctattttataccaacatttattt	5614	99.93	Alcyonidium	82.8	BOLD	Yes	Yes	Alcyonidium 82.8 %
157	North	77.47	29.97	80	0	January	10.01.2018	Gastropod veliger	NA	NA	attaagtaatataggtcacataactcaaagagtagatttttgtattttttcattacatttagcaggtttatcatcaattattggggcaatcaacataattacaacaattatagtaagacgttcaaaaataataacactatctcgaataagattatatttatgaagaatattaattactttaattttattattactatccttacctgtacttgcaggtgctatcacaatactattactagatcgtaattttaacactacattttttgatcctgtaggaggaggtgatccaatcttatttcaacatctattt	16	87.5	Limacina helicina	100	BOLD	No	Yes	Limacina helicina
158	North	77.47	29.97	80	0	January	10.01.2018	Nudibranch	NA	NA	tctatcaggggctattgggcatggtggatgttctgtggatttggctattttttctttgcatttagcagggatgtcttctcttcttggtgcaatcaattttattactactatttttaatatgcggtctccagcgatgactttagatcggttaagattatttgtgtgatctgttcttgttactgcttttttattattactttctttacctgttttagctggggcaattactatgctgcttacagaccggaattttaatactaggttctttgacccagccggtgggggagacccaattttgtaccagcatttattt	8134	99.64	Dendronotus dalli	99.7	BOLD	Yes	Yes	Dendronotus dalli
159	North	77.47	29.97	80	0	January	10.01.2018	Gastropod veliger	NA	NA	attgtcttcatacccattttctggtgcatctatagattttgtaattttctctattcatgttgctggggcttcttctattgctggagctttaaactttttaactacgggtttaaatatgcgaattaaatcaatagagttaaagcgaatacctttatttgtttgatctattattgtaactgcttttctattggtgttagcaatgcctgttttggcgggagctgttactatgcttattagggaccgtcattttaatacaactttttatgatccagcgggagggggggatcctgtattatttgtgcatctattt	7	42.86	Hiatella sp. K	100	BOLD	Yes	No	Insufficient reads
160	North	77.47	29.97	80	0	January	10.01.2018	Limacina?	NA	NA	tttgtctagaaatgtggctcattcagggccttctgtagatttggctattttttctttacatttagcaggggtatcttctattcttgcgtcaattaactttattactaccgcaatgaatatgcgttctagaggtcttcggttagagcgtgtgccgttgtttgtgtggtctgtggctattactgctttacttcttttgttatctttgcctgttcttgcgggagctattacaatattgttaactgatcgaaacttaaatacatctttttttgatcctgccggaggtggagatcctattttgtatcaacatcttttt	12	41.67	Phyllodoce groenlandica	100	BOLD	Yes	No	Insufficient reads
161	North	77.47	29.97	80	0	January	10.01.2018	Cyprid	NA	NA	tctatcaagaaatattgctcactcaggagcttcagtagatttatcaattttttctttacatctggcaggggcttcctcaattcttggagctattaattttatatctacagtaattaatatgcgagctgaaactcttacatttgatcggcttcctctttttgtgtgaagtgtttttattacagtaattttactgctcctatcacttcctgtactagcaggagctattactatacttcttacagatcgaaatttaaacacatcattctttgaccctacagggggaggagaccctattttataccaacacctattt	10614	99.86	Balanus sp.	100	BOLD	Yes	Yes	Balanus sp.
162	North	77.47	29.97	80	0	January	10.01.2018	Bivalve veliger	217	Anterior-posterior length	attgtcttcatacccattttctggtgcatctatagattttgtaattttctctattcatgttgctggggcttcttctattgctggagctttaaactttttaactacgggtttaaatatgcgaattaaatcaatagagttaaagcgaatacctttatttgtttgatctattattgtaactgcttttctattggtgttagcaatgcctgttttggcgggagctgttactatgcttattagggaccgtcattttaatacaactttttatgatccagcgggagggggggatcctgtattatttgtgcatctattt	1271	99.69	Hiatella sp. K	100	BOLD	Yes	Yes	Hiatella sp. K
163	North	77.47	29.97	80	0	January	10.01.2018	Bivalve veliger	208	Anterior-posterior length	attgtcttcatacccattttctggtgcatctatagattttgtaattttctctattcatgttgctggggcttcttctattgctggagctttaaactttttaactacgggtttaaatatgcgaattaaatcaatagagttaaagcgaatacctttatttgtttgatctattattgtaactgcttttctattggtgttagcaatgcctgttttggcgggagctgttactatgcttattagggaccgtcattttaatacaactttttatgatccagcgggagggggggatcctgtattatttgtgcatctattt	889	98.65	Hiatella sp. K	100	BOLD	Yes	Yes	Hiatella sp. K
164	North	77.47	29.97	80	0	January	10.01.2018	Gastropod veliger	NA	NA	attaagtaatataggtcacataactcaaagagtagatttttgtattttttcattacatttagcaggtttatcatcaattattggggcaatcaacataattacaacaattatagtaagacgttcaaaaataataacactatctcgaataagattatatttatgaagaatattaattactttaattttattattactatccttacctgtacttgcaggtgctatcacaatactattactagatcgtaattttaacactacattttttgatcctgtaggaggaggtgatccaatcttatttcaacatctattt	28	46.43	Limacina helicina	100	BOLD	No	Yes	Insufficient reads
165	North	77.47	29.97	80	0	January	10.01.2018	Gastropod veliger	NA	NA	ctctcaagtaatattgcacatgctggggcttccgtcgacttcgctattttttcactccacttggcaggggtcagatcaattttaggggctgttaattttattagaactttggggaatctccgagtatttggaatgctattggaccggatgcccctatttgcctgagccgttctcatcactgctgtcctccttttactgtctttaccggtcttagcgggggctatcacgatactattaacagatcgaaacctaaatacgacattttatgatgttgggggggggggagatcctattttataccagcacctcttt	9	55.56	Calanus finmarchicus	99.7	BOLD	No	No	Insufficient reads
166	North	77.47	29.97	80	0	January	10.01.2018	Gastropod veliger	NA	NA	gttgagcactgtgggccatagagggggcgctgtggatttgggtatcttctccttacaccttgctggcgttagaagaatcttggggagagctaattttattaccaccatctctaatataaaaggtgaaggcatatctatagaacttatgcctttattcgtgtgggcggtgctcctcacagctatcttacttttgctctctcttcctgtattagctggtgctattactatgttactaacagaccgtaattttaacacctctttctttgaccctgctggtggcggggacccgattttataccaacacctattt	135	95.56	Sagitta elegans	94.2	BLAST	No	No	Unknown
167	North	77.47	29.97	80	0	January	10.01.2018	Limacina?	NA	NA	No sequence	0	0	No sequence	0	No sequence	No sequence	No	Insufficient reads
168	North	77.47	29.97	80	0	January	10.01.2018	Gastropod veliger	NA	NA	tctctcaggtgcaattgggcatggaggatgttcagtagatttggctattttttccttacatctggcgggtatgtcttctttgttaggtgctattaattttattactactatttttaatatgcggtctccttctataactatagatcgattaagtttatttgtgtggtcagtattagttactgccttcctattactactttctcttcctgtgttggctggggctattacgatacttttaacagatcgtaattttaacactagatttttcgatccagcaggagggggtgatcctattctatatcaacacttattt	3	66.67	Nudibranchia	98.4	BOLD	Yes	Yes	Insufficient reads
169	North	77.47	29.97	80	0	January	10.01.2018	Gastropod veliger	NA	NA	attatccagaaatattgctcatgcaggagggtcagtagattttgctattttttctttacatttagcaggtgttagatctattttaggtgctgtaaattttattagcacattaggtaatttacgagtatttggtatactcctagaccaaatacctttgtttgcgtggtctgtattagtcacagccatccttttattactatccttaccagtattagctggggctattactatattgttgacagatcgtaacttaaacacatcattttatgatgtagggggtggtggggatcctatcttataccaacatttgttt	227	77.53	Pseudocalanus minutus	100	BOLD	No	No	Unknown
170	North	77.47	29.97	80	0	January	10.01.2018	Gastropod veliger	NA	NA	tctttctagaaatattgcacatgctggtggttctgtagatttggctattttttctctacatcttgctggtatttcttctattttgggtgccattaattttattactactattatcaatatgcgctggtacggaatgcagtttgagcgcctatctctttttgtttgatcggtaaagattactgcagtgctattgttattatcccttcctgtattggctggggcgattactatgcttttaactgatcgtaattttaatacttctttttttgaccctgctggtggtggtgacccaattctttatcagcatttgttt	17	82.35	Monostilifera	91.6	BOLD	Yes	No	Unknown
171	North	77.47	29.97	80	0	January	10.01.2018	Nudibranch	NA	NA	tctttcgggggctattggacatggaggctgttctgttgatttggctattttttctttacatttggcaggtatatcttctcttctaggtgcaattaattttattactactatttttaatatgcggtctccagcaatgactttggatcgtctaagattgtttgtatggtctgtcttggtcactgctttcttgcttttgctttccttacctgttttggccggagcaattactatgttgttaactgaccgtaattttaatactagattttttgacccggctggtggtggagatcctattttgtaccaacatttattt	1490	99.33	Dendronotus patricki	100	BLAST	Yes	Yes	Dendronotus patricki
172	North	77.47	29.97	80	0	January	10.01.2018	Bivalve veliger	283	Anterior-posterior length	attgtcttcatacccattttctggtgcatctatagattttgtaattttctctattcatgttgctggggcttcttctattgctggagctttaaactttttaactacgggtttaaatatgcgaattaaatcaatagagttaaagcgaatacctttatttgtttgatctattattgtaactgcttttctattggtgttagcaatgcctgttttggcgggagctgttactatgcttattagggaccgtcattttaatacaactttttatgatccagcgggagggggggatcctgtattatttgtgcatctattt	8655	99.91	Hiatella sp. K	100	BOLD	Yes	Yes	Hiatella sp. K
173	North	77.47	29.97	80	0	January	10.01.2018	Bivalve veliger	300	Anterior-posterior length	tctttcaagaaatttaatagggcattctggtgctgcgggagactttttaattttatctcttcatatcggaggtgcttcatctattatagcatccttaaatttttatagaacgtgaggaaatatgcgtgcaggatgtcatcccttccatcgtgtaccccttttttgtagttctattggggtcacaaggtttcttttaattctagctatgcctgtcttagcaggggcattaacaatactgttaacagatcgcaattttaatactgctttttttgatcctaccggtttaggggaccctatattgtttgttcatttattt	1043	85.23	Mya truncata	100	BLAST	Yes	Yes	Mya truncata
174	North	77.47	29.97	80	0	January	10.01.2018	Bivalve veliger	172	Anterior-posterior length	attgtcttcatacccattttctggtgcatctatagattttgtaattttctctattcatgttgctggggcttcttctattgctggagctttaaactttttaactacgggtttaaatatgcgaattaaatcaatagagttaaagcgaatacctttatttgtttgatctattattgtaactgcttttctattggtgttagcaatgcctgttttggcgggagctgttactatgcttattagggaccgtcattttaatacaactttttatgatccagcgggagggggggatcctgtattatttgtgcatctattt	1028	98.35	Hiatella sp. K	100	BOLD	Yes	Yes	Hiatella sp. K
175	North	77.47	29.97	80	0	January	10.01.2018	Bivalve veliger	310	Anterior-posterior length	attgtcttcatacccattttctggtgcatctatagattttgtaattttctctattcatgttgctggggcttcttctattgctggagctttaaactttttaactacgggtttaaatatgcgaattaaatcaatagagttaaagcgaatacctttatttgtttgatctattattgtaactgcttttctattggtgttagcaatgcctgttttggcgggagctgttactatgcttattagggaccgtcattttaatacaactttttatgatccagcgggagggggggatcctgtattatttgtgcatctattt	4826	99.85	Hiatella sp. K	100	BOLD	Yes	Yes	Hiatella sp. K
176	North	77.47	29.97	80	0	January	10.01.2018	Limacina?	NA	NA	attaagtaatataggtcacataactcaaagagtagatttttgtattttttcattacatttagcaggtttatcatcaattattggggcaatcaacataattacaacaattatagtaagacgttcaaaaataataacactatctcgaataagattatatttatgaagaatattaattactttaattttattattactatccttacctgtacttgcaggtgctatcacaatactattactagatcgtaattttaacactacattttttgatcctgtaggaggaggtgatccaatcttatttcaacatctattt	13	30.77	Limacina helicina	100	BOLD	No	Yes	Insufficient reads
177	North	77.47	29.97	191	130	January	10.01.2018	Ball	NA	NA	attatccagaaatattgctcatgcaggagggtcagtagattttgctattttttctttacatttagcaggtgttagatctattttaggtgctgtaaattttattagcacattaggtaatttacgagtatttggtatactcctagaccaaatacctttgtttgcgtggtctgtattagtcacagccatccttttattactatccttaccagtattagctggggctattactatattgttgacagatcgtaacttaaacacatcattttatgatgtagggggtggtggggatcctatcttataccaacatttgttt	2665	99.92	Pseudocalanus minutus	100	BOLD	No	Yes	Pseudocalanus minutus
178	North	77.47	29.97	191	130	January	10.01.2018	Polychaete juvenile	NA	NA	attgagatcttatattttccatggaggcgcttcagttgactttacaatttttagccttcacttagctggtgtttcttcacttataggggctgtaaattttattagcacagttttgaacttacgcgcattagggatacttatagatcgcatacccttatttccttgagctgtatttattactgctattttactactcctatctctccctgtacttgcaggagcaattactatactacttaccgaccgaaatttaaacacgtctttttatgatcctataggtggaggggaccctgttttataccaacatttattt	638	85.58	Oithona similis	100	BOLD	No	No	Unknown
179	North	77.47	29.97	191	130	January	10.01.2018	Ball	NA	NA	attgtctagtaatattgctcattcaggtgcatcagtagattttgcaattttttctcttcatttagctggtatttcatcaattttaggctctattaattttattactactattattaatatacgtgttgaaggtttacggcttgaacgtatcaggctatttgtatgagctattcatgttactgtctatttattattgagatctctacctgtattagcggctgcaattacaatgttattaactgatcgtaattttaatacagctttttttgaccctgctggcggtggtgaccctattttgtatgagcacttattt	645	98.76	Glyphanostomum pallescens	99.7	BOLD	Yes	Yes	Glyphanostomum pallescens
180	North	77.47	29.97	191	130	January	10.01.2018	Gastropod veliger	NA	NA	attaagtaatataggtcacataactcaaagagtagatttttgtattttttcattacatttagcaggtttatcatcaattattggggcaatcaacataattacaacaattatagtaagacgttcaaaaataataacactatctcgaataagattatatttatgaagaatattaattactttaattttattattactatccttacctgtacttgcaggtgctatcacaatactattactagatcgtaattttaacactacattttttgatcctgtaggaggaggtgatccaatcttatttcaacatctattt	55	83.64	Limacina helicina	100	BOLD	No	Yes	Limacina helicina
185	North	77.47	29.97	191	130	January	10.01.2018	Gastropod veliger	NA	NA	attaagtaatataggtcacataactcaaagagtagatttttgtattttttcattacatttagcaggtttatcatcaattattggggcaatcaacataattacaacaattatagtaagacgttcaaaaataataacactatctcgaataagattatatttatgaagaatattaattactttaattttattattactatccttacctgtacttgcaggtgctatcacaatactattactagatcgtaattttaacactacattttttgatcctgtaggaggaggtgatccaatcttatttcaacatctattt	30	53.33	Limacina helicina	100	BOLD	No	Yes	Insufficient reads
186	North	77.47	29.97	191	130	January	10.01.2018	Gastropod veliger	NA	NA	attaagtaatataggtcacataactcaaagagtagatttttgtattttttcattacatttagcaggtttatcatcaattattggggcaatcaacataattacaacaattatagtaagacgttcaaaaataataacactatctcgaataagattatatttatgaagaatattaattactttaattttattattactatccttacctgtacttgcaggtgctatcacaatactattactagatcgtaattttaacactacattttttgatcctgtaggaggaggtgatccaatcttatttcaacatctattt	24	66.67	Limacina helicina	100	BOLD	No	Yes	Insufficient reads
187	North	77.47	29.97	191	130	January	10.01.2018	Ball	NA	NA	attgtctagtaatattgctcattcaggtgcatcagtagattttgcaattttttctcttcatttagctggtatttcatcaattttaggctctattaattttattactactattattaatatacgtgttgaaggtttacggcttgaacgtatcaggctatttgtatgagctattcatgttactgtctatttattattgagatctctacctgtattagcggctgcaattacaatgttattaactgatcgtaattttaatacagctttttttgaccctgctggcggtggtgaccctattttgtatgagcacttattt	2469	99.84	Glyphanostomum pallescens	99.7	BOLD	Yes	Yes	Glyphanostomum pallescens
188	North	77.47	29.97	191	130	January	10.01.2018	Nudibranch	NA	NA	tctctcaggccctataggtcatggtgggtgttcagtggatttggctattttttctttacacttagctggtatatcctctttacttggggctattaattttattactactatttttaatatgcggtcaccagagatgacatgagatcgactaagtttatttgtttggtctgtgttagtaactgcttttttacttttattgtcattgcctgtcttagcgggggcaattacaatgcttcttacagatcgtaattttaatactagattttttgatcctgcaggagggggggatccaattctttatcaacatttattc	3007	99.93	Bohuslania matsmichaeli	99.7	BOLD	Yes	Yes	Bohuslania matsmichaeli
193	North	77.47	29.97	191	130	January	10.01.2018	Gastropod veliger	NA	NA	tttgtctagaaatgtggctcattcagggccttctgtagatttggctattttttctttacatttagcaggggtatcttctattcttgcgtcaattaactttattactaccgcaatgaatatgcgttctagaggtcttcggttagagcgtgtgccgttgtttgtgtggtctgtggctattactgctttacttcttttgttatctttgcctgttcttgcgggagctattacaatattgttaactgatcgaaacttaaatacatctttttttgatcctgccggaggtggagatcctattttgtatcaacatcttttt	8	62.5	Phyllodoce groenlandica	100	BOLD	Yes	No	Insufficient reads
194	North	77.47	29.97	191	130	January	10.01.2018	Gastropod veliger	NA	NA	No sequence	0	0	No sequence	0	No sequence	No sequence	No	Insufficient reads
195	North	77.47	29.97	191	130	January	10.01.2018	Gastropod veliger	NA	NA	actttctaggtctattgctcatgcaggtgggtgtgtagatctcgtaattttttctcttcatttggctggagcttcatctattctagcatctattaattttattgctacaattatcaaaatgcgtgctccaggtatgagaatggattatcttcctctttttatttggtctatacttataactactgttttattattgttgtctttgccggtcttggctggggctatcacaatgttattaactgatcgtaatatcaacacaacattttttgatcccaccggagggggggatcctatcttgttccaacatttgttt	15	53.33	Ophiacantha bidentata	100	BOLD	Yes	No	Insufficient reads
196	North	77.47	29.97	191	130	January	10.01.2018	Gastropod veliger	NA	NA	actatctgggccagtcgcccatgcaggaggatgtgttgatttagctatattttctcttcatttagctggtgcatcttcgataatggcctctataaaatttattacaacaataattaatatgcgagcacctggaatgacaatggatcgaactcctttatttgtttgatcaattttaataaccacatttcttcttttattatctcttcctgttttagctggagcaattactatgttattaacagatcgaaaaattaaaacttctttttttgatccaacaggaggaggagatccaatcttattccaacatttattt	11	100	Ophiura robusta	100	BOLD	Yes	No	Unknown
197	North	77.47	29.97	191	130	January	10.01.2018	Gastropod veliger	NA	NA	cttgtctaatggtatttgtcattcagggccttcagttgatttagctattttttctctacacttggctgggatttcttctattctagcctctattaattttttaggtactttccgtttagcagtttctggaatttgagactacatgcgagttcctttgtttgtatggtctattgttgtaactacaggtcttttattgttagctttgcccgttttagccggctgtcttactatgttgttaacagaccgtaatataaatactactttttttgatcctgctggagggggggaccctgttttattccaaggcctattc	19	42.11	No match	0	No match	No match	No	Insufficient reads
198	North	77.47	29.97	191	130	January	10.01.2018	Eggs?	NA	NA	ttaagtggaaatatggcccactccggaccatctgttgattttgctattttttctctccatttagctggtgtgtcatctttactaggggcagttaattttattagaacatttggcaatttacgtgggctaggaatacaattagaccaaactcctctttttgcatggtctgtattgattactactattttattattactatccttgccagttttagctggggctattactatattattaacagaccgaaacttaaatacgtccttttacgacacaggtggaggaggcgaccctattctttaccaacatttattt	2828	99.61	Triconia borealis	99.3	BOLD	No	Yes	Triconia borealis
199	North	77.47	29.97	191	130	January	10.01.2018	Unknown	NA	NA	ttatctagtattcaaacgcattcgggaggggcggtcgacatggccatttttagccttcatttagcgggtgcttcttctatattaggggcaatgaattttataacgaccatatttaatatgagagcgccagggttgaccatggacagacttccattatttgtgtggtctattttaattactgcctttttattgttgctttctttacctgttttagcaggggctattactatgcttttaacagatagaaattttaatacgactttctttgatccggccgggggtggagaccctattttattccaacatttattt	9800	97.29	Hormathia digitata	100	BOLD	Yes	Yes	Hormathia digitata
200	North	77.47	29.97	191	130	January	10.01.2018	Gastropod veliger	NA	NA	tttgtcaggccctaccgcacatgcaggaggctgcgtagacctcgcaattttttctctccacctagcaggtgcatcttcaattatggcctcaataaaatttattacaactattataaatatgcgtaggcccggcatgaccatggatcgacttccgctttttgtttgatctattttcttaacaactatattactactcctttctctgcctgttttagcaggagctattacaatgctactaactgatcgtaacataaaaacaacgttttttgatcctacaggaggaggagacccaatacttttccaacatttattt	5	80	Ophiopholis aculeata	100	BOLD	Yes	No	Insufficient reads
201	North	77.47	29.97	191	130	January	10.01.2018	Unknown	NA	NA	tctctccagaaaaattgcccacgcaggaggctcagtagacctcgccatcttttcccttcacctcgctggtgcctcttccatcctagcttccattaactttattacaactgtaataaaaatgcgaacccctggtattacttttgatcgtctacctctatttgtctgatctgtctttataactgcttttcttctactattaagactgccagtcctagcaggagcaataactatgttacttactgaccgaaatataaaaactaccttctttgacccagcaggtggaggagaccctgtattatttcaacacctattc	13235	99.99	Molpadia borealis	99.7	BOLD	Yes	Yes	Molpadia borealis
202	North	77.47	29.97	191	130	January	10.01.2018	Gastropod veliger	NA	NA	ttagcagggaactactcccaccctggagcctccgtagacctaaccatcttctccttacacctagcaggtgtctcctctatcttaggggccatcaatttcatcacaacaattatcaatataaaaccccctgccataacccaataccaaacgcccctcttcgtctgatccgtcctaatcacagcagtcctacttctcctatctctcccagtcctagctgctggcatcactatactactaacagaccgcaacctcaacaccaccttcttcgaccccgccggaggaggagaccccattctataccaacacctattc	2	100	Homo sapiens	100	BOLD	No	No	Insufficient reads
203	North	77.47	29.97	191	130	January	10.01.2018	Limacina?	NA	NA	attaagcacttctttcatgagcttatcaccttcaagtacaggaaatcttatctttggtttattaatctctggtatatcctcatgtctcacatctcttaatttctatacaacaattctaaatctgagatcttattatctgaatttaaagactatgccattattcccttgggctctcttcattacaggaggaatgcttttattaacattaccaatcttatcaggagctcttctaatggtcttggctgatcttcattctaatacacttttctttgaaccaatctttggaggagatcctatattctatcaacacttattt	619	89.01	Thoracosphaera heimii	96.8	BLAST	No	No	Unknown
204	North	77.47	29.97	191	130	January	10.01.2018	Gastropod veliger	NA	NA	attaagtaatataggtcacataactcaaagagtagatttttgtattttttcattacatttagcaggtttatcatcaattattggggcaatcaacataattacaacaattatagtaagacgttcaaaaataataacactatctcgaataagattatatttatgaagaatattaattactttaattttattattactatccttacctgtacttgcaggtgctatcacaatactattactagatcgtaattttaacactacattttttgatcctgtaggaggaggtgatccaatcttatttcaacatctattt	3	66.67	Limacina helicina	100	BOLD	No	Yes	Insufficient reads
205	North	77.47	29.97	191	130	January	10.01.2018	Gastropod veliger	NA	NA	tctgagttcttatatttttcacgggggagcatctgtggactttacaatttttagcctccacctagccggagtctcttctctcctgggggcagtaaactttattagcacggttttaaatttacgggcattaggtatgttaatagatcgcatacctttattcccatgggcagtatttattactgctattctgcttcttttgtcacttcccgttttagcaggagctatcactatactcttgacagatcgaaatttaaacacgtctttttatgatcctataggcgggggtgaccctgtcctctatcagcacttgttt	4	50	Oithona similis	100	BOLD	No	No	Insufficient reads
206	North	77.47	29.97	191	130	January	10.01.2018	Gastropod veliger	NA	NA	attaagtaatataggtcacataactcaaagagtagatttttgtattttttcattacatttagcaggtttatcatcaattattggggcaatcaacataattacaacaattatagtaagacgttcaaaaataataacactatctcgaataagattatatttatgaagaatattaattactttaattttattattactatccttacctgtacttgcaggtgctatcacaatactattactagatcgtaattttaacactacattttttgatcctgtaggaggaggtgatccaatcttatttcaacatctattt	25	92	Limacina helicina	100	BOLD	No	Yes	Limacina helicina
207	North	77.47	29.97	191	130	January	10.01.2018	Gastropod veliger	NA	NA	No sequence	0	0	No sequence	0	No sequence	No sequence	No	Insufficient reads
208	North	77.47	29.97	191	130	January	10.01.2018	Gastropod veliger	NA	NA	attgtcttcatacccattttctggtgcatctatagattttgtaattttctctattcatgttgctggggcttcttctattgctggagctttaaactttttaactacgggtttaaatatgcgaattaaatcaatagagttaaagcgaatacctttatttgtttgatctattattgtaactgcttttctattggtgttagcaatgcctgttttggcgggagctgttactatgcttattagggaccgtcattttaatacaactttttatgatccagcgggagggggggatcctgtattatttgtgcatctattt	1	100	Hiatella sp. K	100	BOLD	Yes	No	Insufficient reads
209	North	77.47	29.97	191	130	January	10.01.2018	Eggs?	NA	NA	ttaagtggaaatatggcccactccggaccatctgttgattttgctattttttctctccatttagctggtgtgtcatctttactaggggcagttaattttattagaacatttggcaatttacgtgggctaggaatacaattagaccaaactcctctttttgcatggtctgtattgattactactattttattattactatccttgccagttttagctggggctattactatattattaacagaccgaaacttaaatacgtccttttacgacacaggtggaggaggcgaccctattctttaccaacatttattt	1946	99.85	Triconia borealis	99.3	BOLD	No	Yes	Triconia borealis
210	North	77.47	29.97	191	130	January	10.01.2018	Gastropod veliger	NA	NA	ttaagtggaaatatggcccactccggaccatctgttgattttgctattttttctctccatttagctggtgtgtcatctttactaggggcagttaattttattagaacatttggcaatttacgtgggctaggaatacaattagaccaaactcctctttttgcatggtctgtattgattactactattttattattactatccttgccagttttagctggggctattactatattattaacagaccgaaacttaaatacgtccttttacgacacaggtggaggaggcgaccctattctttaccaacatttattt	8	100	Triconia borealis	99.3	BOLD	No	No	Insufficient reads
211	North	77.47	29.97	191	130	January	10.01.2018	Ball	NA	NA	attatccagaaatattgctcatgcaggagggtcagtagattttgctattttttctttacatttagcaggtgttagatctattttaggtgctgtaaattttattagcacattaggtaatttacgagtatttggtatactcctagaccaaatacctttgtttgcgtggtctgtattagtcacagccatccttttattactatccttaccagtattagctggggctattactatattgttgacagatcgtaacttaaacacatcattttatgatgtagggggtggtggggatcctatcttataccaacatttgttt	370	99.73	Pseudocalanus minutus	100	BOLD	No	Yes	Pseudocalanus minutus
212	North	77.47	29.97	191	130	January	10.01.2018	Gastropod veliger	NA	NA	actatctgggccagtcgcccatgcaggaggatgtgttgatttagctatattttctcttcatttagctggtgcatcttcgataatggcctctataaaatttattacaacaataattaatatgcgagcacctggaatgacaatggatcgaactcctttatttgtttgatcaattttaataaccacatttcttcttttattatctcttcctgttttagctggagcaattactatgttattaacagatcgaaaaattaaaacttctttttttgatccaacaggaggaggagatccaatcttattccaacatttattt	1	100	Ophiura robusta	100	BOLD	Yes	No	Insufficient reads
213	North	77.47	29.97	191	130	January	10.01.2018	Gastropod veliger	NA	NA	ttatcaggtccggtagctcacgcaggtggttgtgtagatttagcaatattttctttacatttagctggtgcttcttctataatggcctcaataaattttataactacaataattaatatgcgagctcccggtatgacaatggaccgagtccctttatttgtttgatcaatttttattacaacttttttattattattatctttaccagttttagctggtgcaattacaatgttattaactgaccgtaatataaaaacttccttttttgatccaacaggaggaggagacccaatattattccaacacttgttc	8	37.5	Ophiocten gracilis	100	BOLD	Yes	No	Insufficient reads
214	North	77.531	29.979	15	0	June	27.06.2018	Ball	NA	NA	gttgagcactgtgggccatagagggggcgctgtggatttgggtatcttctccttacaccttgctggcgttagaagaatcttggggagagctaattttattaccaccatctctaatataaaaggtgaaggcatatctatagaacttatgcctttattcgtgtgggcggtgctcctcacagctatcttacttttgctctctcttcctgtattagctggtgctattactatgttactaacagaccgtaattttaacacctctttctttgaccctgctggtggcggggacccgattttataccaacacctattt	5270	96.93	Sagitta elegans	94.2	BLAST	No	Yes	Sagitta elegans 94.2 %
215	North	77.531	29.979	15	0	June	27.06.2018	Ball	NA	NA	gttgagcactgtgggccatagagggggcgctgtggatttgggtatcttctccttacaccttgctggcgttagaagaatcttggggagagctaattttattaccaccatctctaatataaaaggtgaaggcatatctatagaacttatgcctttattcgtgtgggcggtgctcctcacagctatcttacttttgctctctcttcctgtattagctggtgctattactatgttactaacagaccgtaattttaacacctctttctttgaccctgctggtggcggggacccgattttataccaacacctattt	4095	99.95	Sagitta elegans	94.2	BLAST	No	Yes	Sagitta elegans 94.2 %
216	North	77.531	29.979	15	0	June	27.06.2018	Gastropod veliger	NA	NA	attaagtaatataggtcacataactcaaagagtagatttttgtattttttcattacatttagcaggtttatcatcaattattggggcaatcaacataattacaacaattatagtaagacgttcaaaaataataacactatctcgaataagattatatttatgaagaatattaattactttaattttattattactatccttacctgtacttgcaggtgctatcacaatactattactagatcgtaattttaacactacattttttgatcctgtaggaggaggtgatccaatcttatttcaacatctattt	30	93.33	Limacina helicina	100	BOLD	No	Yes	Limacina helicina
217	North	77.531	29.979	15	0	June	27.06.2018	Gastropod veliger	NA	NA	attaagtaatataggtcacataactcaaagagtagatttttgtattttttcattacatttagcaggtttatcatcaattattggggcaatcaacataattacaacaattatagtaagacgttcaaaaataataacactatctcgaataagattatatttatgaagaatattaattactttaattttattattactatccttacctgtacttgcaggtgctatcacaatactattactagatcgtaattttaacactacattttttgatcctgtaggaggaggtgatccaatcttatttcaacatctattt	66	59.09	Limacina helicina	100	BOLD	No	Yes	Insufficient reads
218	North	77.531	29.979	15	0	June	27.06.2018	Ball	NA	NA	gttgagcactgtgggccatagagggggcgctgtggatttgggtatcttctccttacaccttgctggcgttagaagaatcttggggagagctaattttattaccaccatctctaatataaaaggtgaaggcatatctatagaacttatgcctttattcgtgtgggcggtgctcctcacagctatcttacttttgctctctcttcctgtattagctggtgctattactatgttactaacagaccgtaattttaacacctctttctttgaccctgctggtggcggggacccgattttataccaacacctattt	5437	99.52	Sagitta elegans	94.2	BLAST	No	Yes	Sagitta elegans 94.2 %
219	North	77.531	29.979	15	0	June	27.06.2018	Gastropod veliger	NA	NA	attaagtaatataggtcacataactcaaagagtagatttttgtattttttcattacatttagcaggtttatcatcaattattggggcaatcaacataattacaacaattatagtaagacgttcaaaaataataacactatctcgaataagattatatttatgaagaatattaattactttaattttattattactatccttacctgtacttgcaggtgctatcacaatactattactagatcgtaattttaacactacattttttgatcctgtaggaggaggtgatccaatcttatttcaacatctattt	95	90.53	Limacina helicina	100	BOLD	No	Yes	Limacina helicina
220	North	77.531	29.979	15	0	June	27.06.2018	Gastropod veliger	NA	NA	attaagtaatataggtcacataactcaaagagtagatttttgtattttttcattacatttagcaggtttatcatcaattattggggcaatcaacataattacaacaattatagtaagacgttcaaaaataataacactatctcgaataagattatatttatgaagaatattaattactttaattttattattactatccttacctgtacttgcaggtgctatcacaatactattactagatcgtaattttaacactacattttttgatcctgtaggaggaggtgatccaatcttatttcaacatctattt	394	95.69	Limacina helicina	100	BOLD	No	Yes	Limacina helicina
221	North	77.531	29.979	15	0	June	27.06.2018	Gastropod veliger	NA	NA	attaagtaatataggtcacataactcaaagagtagatttttgtattttttcattacatttagcaggtttatcatcaattattggggcaatcaacataattacaacaattatagtaagacgttcaaaaataataacactatctcgaataagattatatttatgaagaatattaattactttaattttattattactatccttacctgtacttgcaggtgctatcacaatactattactagatcgtaattttaacactacattttttgatcctgtaggaggaggtgatccaatcttatttcaacatctattt	28	50	Limacina helicina	100	BOLD	No	Yes	Insufficient reads
222	North	77.531	29.979	15	0	June	27.06.2018	Gastropod veliger	NA	NA	attaagtaatataggtcacataactcaaagagtagatttttgtattttttcattacatttagcaggtttatcatcaattattggggcaatcaacataattacaacaattatagtaagacgttcaaaaataataacactatctcgaataagattatatttatgaagaatattaattactttaattttattattactatccttacctgtacttgcaggtgctatcacaatactattactagatcgtaattttaacactacattttttgatcctgtaggaggaggtgatccaatcttatttcaacatctattt	28	67.86	Limacina helicina	100	BOLD	No	Yes	Insufficient reads
223	North	77.531	29.979	15	0	June	27.06.2018	Gastropod veliger	NA	NA	attaagtaatataggtcacataactcaaagagtagatttttgtattttttcattacatttagcaggtttatcatcaattattggggcaatcaacataattacaacaattatagtaagacgttcaaaaataataacactatctcgaataagattatatttatgaagaatattaattactttaattttattattactatccttacctgtacttgcaggtgctatcacaatactattactagatcgtaattttaacactacattttttgatcctgtaggaggaggtgatccaatcttatttcaacatctattt	20	70	Limacina helicina	100	BOLD	No	Yes	Insufficient reads
224	North	77.531	29.979	15	0	June	27.06.2018	Gastropod veliger	NA	NA	attatccagaaatattgctcatgcaggagggtcagtagattttgctattttttctttacatttagcaggtgttagatctattttaggtgctgtaaattttattagcacattaggtaatttacgagtatttggtatactcctagaccaaatacctttgtttgcgtggtctgtattagtcacagccatccttttattactatccttaccagtattagctggggctattactatattgttgacagatcgtaacttaaacacatcattttatgatgtagggggtggtggggatcctatcttataccaacatttgttt	33	36.36	Pseudocalanus minutus	100	BOLD	No	No	Insufficient reads
225	North	77.531	29.979	15	0	June	27.06.2018	Unknown	NA	NA	tttgtcttctttaataggttcacctagtatatctgtagattttttaatttttgccttacatttagctgggtttagttctatattagctagtataaatttttttatttctattgtttgtttaattaatttaaatgaattttttagattaaatttatttttatttggtaatttagtcgtagcttttttattgtttatatctttacctgttttagctggagctattactttgttactttttgatagaaattttaatactgttttttatgatttaaataacggaggtgatgtagttttattccaacatttattt	5357	99.93	No match	0	No match	No match	No	Unknown
226	North	77.531	29.979	15	0	June	27.06.2018	Unknown	NA	NA	tttgtcttctttaataggttcacctagtatatctgtagattttttaatttttgccttacatttagctgggtttagttctatattagctagtataaatttttttatttctattgtttgtttaattaatttaaatgaattttttagattaaatttatttttatttggtaatttagtcgtagcttttttattgtttatatctttacctgttttagctggagctattactttgttactttttgatagaaattttaatactgttttttatgatttaaataacggaggtgatgtagttttattccaacatttattt	76	81.58	No match	0	No match	No match	No	Unknown
227	North	77.531	29.979	15	0	June	27.06.2018	Unknown	NA	NA	tctggccagaaatgtggcacacgcaggaagttctgtagactttgctatcttctctcttcacttagcaggggtctcctcaatcttaggggctattaactttattaggactctgggaaaccttcgtgtctttggtatgttcctagatcgaatacccctgttcgcatgagcagttcttattacaacaattttacttcttttgtcccttcctgtgctcgcaggggccatcacgatattattaacagaccggaacctgaatacctcgttttatgacgtgggaggagggggggaccctattctctaccagcacctgttt	1409	98.79	Metridia longa	99.6	BOLD	No	No	Unknown
228	North	77.531	29.979	15	0	June	27.06.2018	clione trochophore?	NA	NA	actaagatcgttagtaggacataacaaccactctgttgatctggctattttttctttacacttagctggtattaggtctattttaggtgcagtaaattttattactactatcttaaatatacgagcccctggagttagctgagaacgactatctctatttgtgtggtctcttttagtaacaacagttcttctacttttatctcttcctgtattggcaggagctatcactatactcctcactgaccgtaatttcaacacagggttctttgaccctggggccggtggagaccctatcttatttcaacatttattt	17543	97.52	Clione limacina	99.7	BOLD	No	Yes	Clione limacina
229	North	77.531	29.979	15	0	June	27.06.2018	Unknown	NA	NA	tttgtcttctttaataggttcacctagtatatctgtagattttttaatttttgccttacatttagctgggtttagttctatattagctagtataaatttttttatttctattgtttgtttaattaatttaaatgaattttttagattaaatttatttttatttggtaatttagtcgtagcttttttattgtttatatctttacctgttttagctggagctattactttgttactttttgatagaaattttaatactgttttttatgatttaaataacggaggtgatgtagttttattccaacatttattt	3838	98.7	No match	0	No match	No match	No	Unknown
230	North	77.531	29.979	15	0	June	27.06.2018	Gastropod veliger	NA	NA	attaagtaatataggtcacataactcaaagagtagatttttgtattttttcattacatttagcaggtttatcatcaattattggggcaatcaacataattacaacaattatagtaagacgttcaaaaataataacactatctcgaataagattatatttatgaagaatattaattactttaattttattattactatccttacctgtacttgcaggtgctatcacaatactattactagatcgtaattttaacactacattttttgatcctgtaggaggaggtgatccaatcttatttcaacatctattt	14	100	Limacina helicina	100	BOLD	No	Yes	Limacina helicina
231	North	77.531	29.979	15	0	June	27.06.2018	Eggs?	NA	NA	tatcaagtaatattgcacatgcgggggcttctgtggattttgctatcttctccctgcacttagccggagttagctcgatcttgggtgctgtaaattttattagtactttggggaaccttcgtgtgtttggtatacttttagaccgtatgccactatttgcttgggcggtactcattaccgctgtccttctcctattatcattacccgtcctagcaggagctatcaccatattattaacagatcgaaacctaaatacgaccttctatgacgtggggggggggagatcctatcttataccagcacctattt	1794	98.89	Calanus glacialis	100	BOLD	No	Yes	Calanus glacialis
232	North	77.531	29.979	15	0	June	27.06.2018	Eggs?	NA	NA	tatcaagtaatattgcacatgcgggggcttctgtggattttgctatcttctccctgcacttagccggagttagctcgatcttgggtgctgtaaattttattagtactttggggaaccttcgtgtgtttggtatacttttagaccgtatgccactatttgcttgggcggtactcattaccgctgtccttctcctattatcattacccgtcctagcaggagctatcaccatattattaacagatcgaaacctaaatacgaccttctatgacgtggggggggggagatcctatcttataccagcacctattt	967	99.48	Calanus glacialis	100	BOLD	No	Yes	Calanus glacialis
233	North	77.531	29.979	15	0	June	27.06.2018	Eggs?	NA	NA	tatcaagtaatattgcacatgcgggggcttctgtggattttgctatcttctccctgcacttagccggagttagctcgatcttgggtgctgtaaattttattagtactttggggaaccttcgtgtgtttggtatacttttagaccgtatgccactatttgcttgggcggtactcattaccgctgtccttctcctattatcattacccgtcctagcaggagctatcaccatattattaacagatcgaaacctaaatacgaccttctatgacgtggggggggggagatcctatcttataccagcacctattt	1543	98.64	Calanus glacialis	100	BOLD	No	Yes	Calanus glacialis
234	North	77.531	29.979	15	0	June	27.06.2018	Gastropod veliger	NA	NA	attaagtaatataggtcacataactcaaagagtagatttttgtattttttcattacatttagcaggtttatcatcaattattggggcaatcaacataattacaacaattatagtaagacgttcaaaaataataacactatctcgaataagattatatttatgaagaatattaattactttaattttattattactatccttacctgtacttgcaggtgctatcacaatactattactagatcgtaattttaacactacattttttgatcctgtaggaggaggtgatccaatcttatttcaacatctattt	13	53.85	Limacina helicina	100	BOLD	No	Yes	Insufficient reads
235	North	77.531	29.979	15	0	June	27.06.2018	Gastropod veliger	NA	NA	attaagtaatataggtcacataactcaaagagtagatttttgtattttttcattacatttagcaggtttatcatcaattattggggcaatcaacataattacaacaattatagtaagacgttcaaaaataataacactatctcgaataagattatatttatgaagaatattaattactttaattttattattactatccttacctgtacttgcaggtgctatcacaatactattactagatcgtaattttaacactacattttttgatcctgtaggaggaggtgatccaatcttatttcaacatctattt	117	84.62	Limacina helicina	100	BOLD	No	Yes	Limacina helicina
236	North	77.531	29.979	15	0	June	27.06.2018	Gastropod veliger	NA	NA	attaagtaatataggtcacataactcaaagagtagatttttgtattttttcattacatttagcaggtttatcatcaattattggggcaatcaacataattacaacaattatagtaagacgttcaaaaataataacactatctcgaataagattatatttatgaagaatattaattactttaattttattattactatccttacctgtacttgcaggtgctatcacaatactattactagatcgtaattttaacactacattttttgatcctgtaggaggaggtgatccaatcttatttcaacatctattt	53	100	Limacina helicina	100	BOLD	No	Yes	Limacina helicina
237	North	77.531	29.979	15	0	June	27.06.2018	Eggs?	NA	NA	tatcaagtaatattgcacatgcgggggcttctgtggattttgctatcttctccctgcacttagccggagttagctcgatcttgggtgctgtaaattttattagtactttggggaaccttcgtgtgtttggtatacttttagaccgtatgccactatttgcttgggcggtactcattaccgctgtccttctcctattatcattacccgtcctagcaggagctatcaccatattattaacagatcgaaacctaaatacgaccttctatgacgtggggggggggagatcctatcttataccagcacctattt	2025	99.75	Calanus glacialis	100	BOLD	No	Yes	Calanus glacialis
238	North	77.531	29.979	15	0	June	27.06.2018	Eggs?	NA	NA	tatcaagtaatattgcacatgcgggggcttctgtggattttgctatcttctccctgcacttagccggagttagctcgatcttgggtgctgtaaattttattagtactttggggaaccttcgtgtgtttggtatacttttagaccgtatgccactatttgcttgggcggtactcattaccgctgtccttctcctattatcattacccgtcctagcaggagctatcaccatattattaacagatcgaaacctaaatacgaccttctatgacgtggggggggggagatcctatcttataccagcacctattt	3318	99.4	Calanus glacialis	100	BOLD	No	Yes	Calanus glacialis
239	North	77.531	29.979	15	0	June	27.06.2018	Ball	NA	NA	gttgagcactgtgggccatagagggggcgctgtggatttgggtatcttctccttacaccttgctggcgttagaagaatcttggggagagctaattttattaccaccatctctaatataaaaggtgaaggcatatctatagaacttatgcctttattcgtgtgggcggtgctcctcacagctatcttacttttgctctctcttcctgtattagctggtgctattactatgttactaacagaccgtaattttaacacctctttctttgaccctgctggtggcggggacccgattttataccaacacctattt	5215	99.81	Sagitta elegans	94.2	BLAST	No	Yes	Sagitta elegans 94.2 %
240	North	77.531	29.979	15	0	June	27.06.2018	Ball	NA	NA	gttgagcactgtgggccatagagggggcgctgtggatttgggtatcttctccttacaccttgctggcgttagaagaatcttggggagagctaattttattaccaccatctctaatataaaaggtgaaggcatatctatagaacttatgcctttattcgtgtgggcggtgctcctcacagctatcttacttttgctctctcttcctgtattagctggtgctattactatgttactaacagaccgtaattttaacacctctttctttgaccctgctggtggcggggacccgattttataccaacacctattt	2154	99.91	Sagitta elegans	94.2	BLAST	No	Yes	Sagitta elegans 94.2 %
241	North	77.531	29.979	130	18	June	27.06.2018	Ophiopluteus	702	Posterodorsal arm	ttatcaggtccggtagctcacgcaggtggttgtgtagatttagcaatattttctttacatttagctggtgcttcttctataatggcctcaataaattttataactacaataattaatatgcgagctcccggtatgacaatggaccgagtccctttatttgtttgatcaatttttattacaacttttttattattattatctttaccagttttagctggtgcaattacaatgttattaactgaccgtaatataaaaacttccttttttgatccaacaggaggaggagacccaatattattccaacacttgttc	196	100	Ophiocten gracilis	100	BOLD	Yes	Yes	Ophiocten gracilis
242	North	77.531	29.979	130	18	June	27.06.2018	Ophiopluteus	NA	NA	attaagtaatataggtcacataactcaaagagtagatttttgtattttttcattacatttagcaggtttatcatcaattattggggcaatcaacataattacaacaattatagtaagacgttcaaaaataataacactatctcgaataagattatatttatgaagaatattaattactttaattttattattactatccttacctgtacttgcaggtgctatcacaatactattactagatcgtaattttaacactacattttttgatcctgtaggaggaggtgatccaatcttatttcaacatctattt	73	89.04	Limacina helicina	100	BOLD	No	No	Unknown
243	North	77.531	29.979	130	18	June	27.06.2018	Trochophore?	NA	NA	tctatcggattccaagtttcactcaggaatttctgtagatttagctatttttagtctccatctagcaggtatctcatcaattttgggcagtattaatttcataactaccattgtgtgttctcgtacaactaagatagttagaatagaccgattacctcttatactatgatctctaggtgtaacggccttcctacttttaacaactcttccagtattagcaggtgccattactatgttacttacagaccgcaattttaacacttcgttcttcgatccttcgggaggtgggaaccctgttctatatcaacatctattt	251	94.82	Rotifera	99.3	BOLD	No	Yes	Rotifera
244	North	77.531	29.979	130	18	June	27.06.2018	Eggs?	NA	NA	tatcaagtaatattgcacatgcgggggcttctgtggattttgctatcttctccctgcacttagccggagttagctcgatcttgggtgctgtaaattttattagtactttggggaaccttcgtgtgtttggtatacttttagaccgtatgccactatttgcttgggcggtactcattaccgctgtccttctcctattatcattacccgtcctagcaggagctatcaccatattattaacagatcgaaacctaaatacgaccttctatgacgtggggggggggagatcctatcttataccagcacctattt	641	99.84	Calanus glacialis	100	BOLD	No	Yes	Calanus glacialis
245	North	77.531	29.979	130	18	June	27.06.2018	Ophiopluteus	419	Posterodorsal arm	tttgtcaggccctaccgcacatgcaggaggctgcgtagacctcgcaattttttctctccacctagcaggtgcatcttcaattatggcctcaataaaatttattacaactattataaatatgcgtaggcccggcatgaccatggatcgacttccgctttttgtttgatctattttcttaacaactatattactactcctttctctgcctgttttagcaggagctattacaatgctactaactgatcgtaacataaaaacaacgttttttgatcctacaggaggaggagacccaatacttttccaacatttattt	3802	99.13	Ophiopholis aculeata	100	BOLD	Yes	Yes	Ophiopholis aculeata
246	North	77.531	29.979	130	18	June	27.06.2018	Trochophore?	NA	NA	tctatcggattccaagtttcactcaggaatttctgtagatttagctatttttagtctccatctagcaggtatctcatcaattttgggcagtattaatttcataactaccattgtgtgttctcgtacaactaagatagttagaatagaccgattacctcttatactatgatctctaggtgtaacggccttcctacttttaacaactcttccagtattagcaggtgccattactatgttacttacagaccgcaattttaacacttcgttcttcgatccttcgggaggtgggaaccctgttctatatcaacatctattt	77	77.92	Rotifera	99.3	BOLD	No	Yes	Rotifera
247	North	77.531	29.979	130	18	June	27.06.2018	Trochophore?	NA	NA	tctatcggattccaagtttcactcaggaatttctgtagatttagctatttttagtctccatctagcaggtatctcatcaattttgggcagtattaatttcataactaccattgtgtgttctcgtacaactaagatagttagaatagaccgattacctcttatactatgatctctaggtgtaacggccttcctacttttaacaactcttccagtattagcaggtgccattactatgttacttacagaccgcaattttaacacttcgttcttcgatccttcgggaggtgggaaccctgttctatatcaacatctattt	37	81.08	Rotifera	99.3	BOLD	No	Yes	Rotifera
248	North	77.531	29.979	130	18	June	27.06.2018	crustacean	NA	NA	ttatcagctggtattgcacatgcaggagcctctgttgatatgggaattttttctttacatattgctggagcttcatctattttgggagcagtaaattttattactactgtaattaacatacgatctgcgggaatgacaatagaccgaattcctttatttgtatgatcagtatttattacagctattttacttttattatctttaccggttctagcaggagctattactatacttttaacagatcgtaatttaaatacctctttttttgaccctgcaggaggaggagaccctattttatatcaacatttattt	5933	97.76	Thysanoessa inermis	100	BOLD	No	Yes	Thysanoessa inermis
249	North	77.531	29.979	130	18	June	27.06.2018	Eggs?	NA	NA	tatcaagtaatattgcacatgcgggggcttctgtggattttgctatcttctccctgcacttagccggagttagctcgatcttgggtgctgtaaattttattagtactttggggaaccttcgtgtgtttggtatacttttagaccgtatgccactatttgcttgggcggtactcattaccgctgtccttctcctattatcattacccgtcctagcaggagctatcaccatattattaacagatcgaaacctaaatacgaccttctatgacgtggggggggggagatcctatcttataccagcacctattt	485	99.79	Calanus glacialis	100	BOLD	No	Yes	Calanus glacialis
250	North	77.531	29.979	130	18	June	27.06.2018	Eggs?	NA	NA	tatcaagtaatattgcacatgcgggggcttctgtggattttgctatcttctccctgcacttagccggagttagctcgatcttgggtgctgtaaattttattagtactttggggaaccttcgtgtgtttggtatacttttagaccgtatgccactatttgcttgggcggtactcattaccgctgtccttctcctattatcattacccgtcctagcaggagctatcaccatattattaacagatcgaaacctaaatacgaccttctatgacgtggggggggggagatcctatcttataccagcacctattt	38	89.47	Calanus glacialis	100	BOLD	No	Yes	Calanus glacialis
251	North	77.531	29.979	130	18	June	27.06.2018	Trochophore - cilia	NA	NA	tttatctagtggtacttcacattcaggaggtgctgttgatttagctatttttagtttacacttatcaggagcttcatcaattttaggtgctataaactttatttgtaccatttttaacatgcgagttaaaagtttatcgttccataaattaccactatttgtatgggctgtattaataacagcatttttacttttattatcattacctgttttagcaggcgctattacaatgttattaacagatagaaatttcaatacaacattctttgatcctgctggtggaggtgacccaattttataccaacatttattt	50	50	Chaetoceros socialis	90.2	BLAST	No	No	Insufficient reads
252	North	77.531	29.979	130	18	June	27.06.2018	Eggs?	NA	NA	tatcaagtaatattgcacatgcgggggcttctgtggattttgctatcttctccctgcacttagccggagttagctcgatcttgggtgctgtaaattttattagtactttggggaaccttcgtgtgtttggtatacttttagaccgtatgccactatttgcttgggcggtactcattaccgctgtccttctcctattatcattacccgtcctagcaggagctatcaccatattattaacagatcgaaacctaaatacgaccttctatgacgtggggggggggagatcctatcttataccagcacctattt	409	98.53	Calanus glacialis	100	BOLD	No	Yes	Calanus glacialis
253	North	77.531	29.979	130	18	June	27.06.2018	Gastropod veliger	NA	NA	attaagtaatataggtcacataactcaaagagtagatttttgtattttttcattacatttagcaggtttatcatcaattattggggcaatcaacataattacaacaattatagtaagacgttcaaaaataataacactatctcgaataagattatatttatgaagaatattaattactttaattttattattactatccttacctgtacttgcaggtgctatcacaatactattactagatcgtaattttaacactacattttttgatcctgtaggaggaggtgatccaatcttatttcaacatctattt	196	85.71	Limacina helicina	100	BOLD	No	Yes	Limacina helicina
254	North	77.531	29.979	130	18	June	27.06.2018	Gastropod veliger	NA	NA	attaagtaatataggtcacataactcaaagagtagatttttgtattttttcattacatttagcaggtttatcatcaattattggggcaatcaacataattacaacaattatagtaagacgttcaaaaataataacactatctcgaataagattatatttatgaagaatattaattactttaattttattattactatccttacctgtacttgcaggtgctatcacaatactattactagatcgtaattttaacactacattttttgatcctgtaggaggaggtgatccaatcttatttcaacatctattt	841	99.88	Limacina helicina	100	BOLD	No	Yes	Limacina helicina
255	North	77.531	29.979	130	18	June	27.06.2018	Gastropod veliger	NA	NA	attaagtaatataggtcacataactcaaagagtagatttttgtattttttcattacatttagcaggtttatcatcaattattggggcaatcaacataattacaacaattatagtaagacgttcaaaaataataacactatctcgaataagattatatttatgaagaatattaattactttaattttattattactatccttacctgtacttgcaggtgctatcacaatactattactagatcgtaattttaacactacattttttgatcctgtaggaggaggtgatccaatcttatttcaacatctattt	38	89.47	Limacina helicina	100	BOLD	No	Yes	Limacina helicina
256	North	77.531	29.979	130	18	June	27.06.2018	Ophiopluteus	NA	NA	tttatctgggccagtagcacacgcaggtggttgtgtagacttagcaatattttctttacatttagctggtgcttcttctataatggcttcaataaattttattacaacaataataaatatgcgagctcccggtatgacaatggaccgaactcccttatttgtttgatcaatttttattacaacttttttattattattatcactaccagttttagctggggcaattacaatgcttcttactgaccgtaaaattaaaacttctttctttgaccccacaggagggggagaccctatattatttcaacatttattt	249	55.82	Ophiocten sericeum	100	BOLD	Yes	Yes	Insufficient reads
257	North	77.531	29.979	130	18	June	27.06.2018	Gastropod veliger	NA	NA	attaagtaatataggtcacataactcaaagagtagatttttgtattttttcattacatttagcaggtttatcatcaattattggggcaatcaacataattacaacaattatagtaagacgttcaaaaataataacactatctcgaataagattatatttatgaagaatattaattactttaattttattattactatccttacctgtacttgcaggtgctatcacaatactattactagatcgtaattttaacactacattttttgatcctgtaggaggaggtgatccaatcttatttcaacatctattt	63	80.95	Limacina helicina	100	BOLD	No	Yes	Limacina helicina
258	North	77.531	29.979	130	18	June	27.06.2018	Unknown	NA	NA	tttagctggtaatgttgctcatgcaggcggatcggtggatttagctattttttctcttcatttggctggtgtttcttctattttaggggctattaattttatcactactgtagtaaatatgcgctgacgggggcttcagtttgagcgtcttcctttgtttgtttggtctgtaaaaattactgcaattcttttgttgttgtctttgcctgttttggctggtgcaattactatgttgttgacagatcgtaattttaatacttctttttttgatcctgctgggggaggtgatccaattctttatcagcatcttttt	248	93.15	Lineidae	99	BOLD	Yes	Yes	Lineidae
259	North	77.531	29.979	130	18	June	27.06.2018	Trochophore?	NA	NA	tctatcggattccaagtttcactcaggaatttctgtagatttagctatttttagtctccatctagcaggtatctcatcaattttgggcagtattaatttcataactaccattgtgtgttctcgtacaactaagatagttagaatagaccgattacctcttatactatgatctctaggtgtaacggccttcctacttttaacaactcttccagtattagcaggtgccattactatgttacttacagaccgcaattttaacacttcgttcttcgatccttcgggaggtgggaaccctgttctatatcaacatctattt	53	81.13	Rotifera	99.3	BOLD	No	Yes	Rotifera
260	North	77.531	29.979	130	18	June	27.06.2018	Gastropod veliger	NA	NA	attaagtaatataggtcacataactcaaagagtagatttttgtattttttcattacatttagcaggtttatcatcaattattggggcaatcaacataattacaacaattatagtaagacgttcaaaaataataacactatctcgaataagattatatttatgaagaatattaattactttaattttattattactatccttacctgtacttgcaggtgctatcacaatactattactagatcgtaattttaacactacattttttgatcctgtaggaggaggtgatccaatcttatttcaacatctattt	56	89.29	Limacina helicina	100	BOLD	No	Yes	Limacina helicina
261	North	77.531	29.979	130	18	June	27.06.2018	Ophiopluteus	1205	Posterodorsal arm	tttatctgggccagtagcacacgcaggtggttgtgtagacttagcaatattttctttacatttagctggtgcttcttctataatggcttcaataaattttattacaacaataataaatatgcgagctcccggtatgacaatggaccgaactcccttatttgtttgatcaatttttattacaacttttttattattattatcactaccagttttagctggggcaattacaatgcttcttactgaccgtaaaattaaaacttctttctttgaccccacaggagggggagaccctatattatttcaacatttattt	2118	99.62	Ophiocten sericeum	100	BOLD	Yes	Yes	Ophiocten sericeum
262	North	77.531	29.979	130	18	June	27.06.2018	Gastropod veliger	NA	NA	tttgtcaggaattttagctcattctggtggcgctgtcgatttagctatttttagcttacatttggcgggtatttcgtctattttaggagctataaattttattgtaactattttaaacatgcgttgtcctggtatgactgctcatagaacacctttatttgtttgggctgtttttataacagcttttttacttttgttatcacttcctgttttagctggcgctattacaatgttattaacagatagaaattttaatacgtctttctttgatccaaacggtggtggtgatcctgtcttatatcagcatttgttt	94	72.34	Phaeocystis antarctica	91.6	BOLD	No	No	Insufficient reads
263	North	77.531	29.979	130	18	June	27.06.2018	Gastropod veliger	NA	NA	attaagtaatataggtcacataactcaaagagtagatttttgtattttttcattacatttagcaggtttatcatcaattattggggcaatcaacataattacaacaattatagtaagacgttcaaaaataataacactatctcgaataagattatatttatgaagaatattaattactttaattttattattactatccttacctgtacttgcaggtgctatcacaatactattactagatcgtaattttaacactacattttttgatcctgtaggaggaggtgatccaatcttatttcaacatctattt	163	96.93	Limacina helicina	100	BOLD	No	Yes	Limacina helicina
264	North	77.531	29.979	130	18	June	27.06.2018	Gastropod veliger	NA	NA	tttgtcaggaattttagctcattctggtggcgctgtcgatttagctatttttagcttacatttggcgggtatttcgtctattttaggagctataaattttattgtaactattttaaacatgcgttgtcctggtatgactgctcatagaacacctttatttgtttgggctgtttttataacagcttttttacttttgttatcacttcctgttttagctggcgctattacaatgttattaacagatagaaattttaatacgtctttctttgatccaaacggtggtggtgatcctgtcttatatcagcatttgttt	91	78.02	Phaeocystis antarctica	91.6	BOLD	No	No	Unknown
265	North	77.531	29.979	195	130	June	27.06.2018	Bivalve veliger	145	Anterior-posterior length	tctttcaagaaatttaatagggcattctggtgctgcgggagactttttaattttatctcttcatatcggaggtgcttcatctattatagcatccttaaatttttatagaacgtgaggaaatatgcgtgcaggatgtcatcccttccatcgtgtaccccttttttgtagttctattggggtcacaaggtttcttttaattctagctatgcctgtcttagcaggggcattaacaatactgttaacagatcgcaattttaatactgctttttttgatcctaccggtttaggggaccctatattgtttgttcatttattt	61	49.18	Mya truncata	100	BLAST	Yes	Yes	Insufficient reads
266	North	77.531	29.979	195	130	June	27.06.2018	Gastropod veliger	NA	NA	attaagtaatataggtcacataactcaaagagtagatttttgtattttttcattacatttagcaggtttatcatcaattattggggcaatcaacataattacaacaattatagtaagacgttcaaaaataataacactatctcgaataagattatatttatgaagaatattaattactttaattttattattactatccttacctgtacttgcaggtgctatcacaatactattactagatcgtaattttaacactacattttttgatcctgtaggaggaggtgatccaatcttatttcaacatctattt	71	91.55	Limacina helicina	100	BOLD	No	Yes	Limacina helicina
267	North	77.531	29.979	195	130	June	27.06.2018	Bivalve veliger	136	Anterior-posterior length	attgtcttcatacccattttctggtgcatctatagattttgtaattttctctattcatgttgctggggcttcttctattgctggagctttaaactttttaactacgggtttaaatatgcgaattaaatcaatagagttaaagcgaatacctttatttgtttgatctattattgtaactgcttttctattggtgttagcaatgcctgttttggcgggagctgttactatgcttattagggaccgtcattttaatacaactttttatgatccagcgggagggggggatcctgtattatttgtgcatctattt	276	93.48	Hiatella sp. K	100	BOLD	Yes	Yes	Hiatella sp. K
268	North	77.531	29.979	195	130	June	27.06.2018	Eggs?	NA	NA	tatcaagtaatattgcacatgcgggggcttctgtggattttgctatcttctccctgcacttagccggagttagctcgatcttgggtgctgtaaattttattagtactttggggaaccttcgtgtgtttggtatacttttagaccgtatgccactatttgcttgggcggtactcattaccgctgtccttctcctattatcattacccgtcctagcaggagctatcaccatattattaacagatcgaaacctaaatacgaccttctatgacgtggggggggggagatcctatcttataccagcacctattt	2789	99.53	Calanus glacialis	100	BOLD	No	Yes	Calanus glacialis
269	North	77.531	29.979	195	130	June	27.06.2018	Eggs?	NA	NA	ctctcaagtaatattgcacatgctggggcttccgtcgacttcgctattttttcactccacttggcaggggtcagatcaattttaggggctgttaattttattagaactttggggaatctccgagtatttggaatgctattggaccggatgcccctatttgcctgagccgttctcatcactgctgtcctccttttactgtctttaccggtcttagcgggggctatcacgatactattaacagatcgaaacctaaatacgacattttatgatgttgggggggggggagatcctattttataccagcacctcttt	1360	99.19	Calanus finmarchicus	99.7	BOLD	No	Yes	Calanus finmarchicus
270	North	77.531	29.979	195	130	June	27.06.2018	Bivalve veliger	164	Anterior-posterior length	tctttcaagaaatttaatagggcattctggtgctgcgggagactttttaattttatctcttcatatcggaggtgcttcatctattatagcatccttaaatttttatagaacgtgaggaaatatgcgtgcaggatgtcatcccttccatcgtgtaccccttttttgtagttctattggggtcacaaggtttcttttaattctagctatgcctgtcttagcaggggcattaacaatactgttaacagatcgcaattttaatactgctttttttgatcctaccggtttaggggaccctatattgtttgttcatttattt	165	49.09	Mya truncata	100	BLAST	Yes	Yes	Insufficient reads
271	North	77.531	29.979	195	130	June	27.06.2018	Polychaete juvenile	NA	NA	tctggccagaaatgtggcacacgcaggaagttctgtagactttgctatcttctctcttcacttagcaggggtctcctcaatcttaggggctattaactttattaggactctgggaaaccttcgtgtctttggtatgttcctagatcgaatacccctgttcgcatgagcagttcttattacaacaattttacttcttttgtcccttcctgtgctcgcaggggccatcacgatattattaacagaccggaacctgaatacctcgttttatgacgtgggaggagggggggaccctattctctaccagcacctgttt	63	49.21	Metridia longa	99.6	BOLD	No	No	Insufficient reads
272	North	77.531	29.979	195	130	June	27.06.2018	Bivalve veliger	141	Anterior-posterior length	attgtcttcatacccattttctggtgcatctatagattttgtaattttctctattcatgttgctggggcttcttctattgctggagctttaaactttttaactacgggtttaaatatgcgaattaaatcaatagagttaaagcgaatacctttatttgtttgatctattattgtaactgcttttctattggtgttagcaatgcctgttttggcgggagctgttactatgcttattagggaccgtcattttaatacaactttttatgatccagcgggagggggggatcctgtattatttgtgcatctattt	118	91.53	Hiatella sp. K	100	BOLD	Yes	Yes	Hiatella sp. K
273	North	77.444	27.415	160	100	November	23.11.2017	Blob 2 eyes	NA	NA	tttgtctagaaatgtggctcattcagggccttctgtagatttggctattttttctttacatttagcaggggtatcttctattcttgcgtcaattaactttattactaccgcaatgaatatgcgttctagaggtcttcggttagagcgtgtgccgttgtttgtgtggtctgtggctattactgctttacttcttttgttatctttgcctgttcttgcgggagctattacaatattgttaactgatcgaaacttaaatacatctttttttgatcctgccggaggtggagatcctattttgtatcaacatcttttt	11379	99.89	Phyllodoce groenlandica	100	BOLD	Yes	Yes	Phyllodoce groenlandica
274	North	77.444	27.415	160	100	November	23.11.2017	Blob spines	NA	NA	tctttctagaaatattgcacatgctggtggttctgtagatttggctattttttctctacatcttgctggtatttcttctattttgggtgccattaattttattactactattatcaatatgcgctggtacggaatgcagtttgagcgcctatctctttttgtttgatcggtaaagattactgcagtgctattgttattatcccttcctgtattggctggggcgattactatgcttttaactgatcgtaattttaatacttctttttttgaccctgctggtggtggtgacccaattctttatcagcatttgttt	4732	99.7	Monostilifera	91.6	BOLD	Yes	Yes	Monostilifera 91.6 %
275	North	77.444	27.415	160	100	November	23.11.2017	Blob 2 eyes	NA	NA	tttgtctagaaatgtggctcattcagggccttctgtagatttggctattttttctttacatttagcaggggtatcttctattcttgcgtcaattaactttattactaccgcaatgaatatgcgttctagaggtcttcggttagagcgtgtgccgttgtttgtgtggtctgtggctattactgctttacttcttttgttatctttgcctgttcttgcgggagctattacaatattgttaactgatcgaaacttaaatacatctttttttgatcctgccggaggtggagatcctattttgtatcaacatcttttt	1399	99.43	Phyllodoce groenlandica	100	BOLD	Yes	Yes	Phyllodoce groenlandica
276	North	77.444	27.415	160	100	November	23.11.2017	Gastropod veliger	NA	NA	tctttcaggggcaattggacacggtggatgttctgtggatctagctatcttttctcttcatttagctggtatgtcttccttgttgggtgctattaattttattactactatttttaacatacgttctccggagatgactatggatcgattaagtttatttgtttgatcagtgttggttactgcttttttattgcttttatctcttcctgttttagcaggggctattactatgcttttaactgatcgtaattttaacactaggttttttgatcctgcgggaggaggggatcctattttgtatcaacatttattt	24	37.5	Microchlamylla gracilis	99.7	BOLD	Yes	Yes	Insufficient reads
277	North	77.444	27.415	160	100	November	23.11.2017	Blob	NA	NA	ttaagtggaaatatggcccactccggaccatctgttgattttgctattttttctctccatttagctggtgtgtcatctttactaggggcagttaattttattagaacatttggcaatttacgtgggctaggaatacaattagaccaaactcctctttttgcatggtctgtattgattactactattttattattactatccttgccagttttagctggggctattactatattattaacagaccgaaacttaaatacgtccttttacgacacaggtggaggaggcgaccctattctttaccaacatttattt	7163	99.76	Triconia borealis	99.3	BOLD	No	Yes	Triconia borealis
278	North	77.444	27.415	160	100	November	23.11.2017	Ball big	NA	NA	ctgtctggtccagttgctcatgctggaggatgtgttgatctagccattttttctttacacttagctggtgcatcctctattatggcttcaattaattttattactactattattaatatgcgagcacccggaatgacaatggaccgaaccccattatttgtgtgatcaattttaataacaacttttcttttattattgtcacttccagtgctagcaggagctattactatgcttttaactgatcgtaatattaaaacttccttctttgaccccacaggaggaggggatcctattttatttcaacacctattt	7512	99.99	Ophiopleura borealis	100	BOLD	Yes	Yes	Ophiopleura borealis
279	North	77.444	27.415	160	100	November	23.11.2017	Ball small	NA	NA	tctagcaaatgctattgcccatgcaggcccatcagtagaccttgcaatcttctcccttcacttagccggtgtcagctccattcttgcctcgctgaactttatcactacagtatataatatacgtggccatggtttctgaatattccgtgttccactatttgtctgggccattatacttacaacaatccttcttcttcttgccttgcctgttctagcaggagcgattactatactattaaccgaccgcaacctaaacacctgcttctttgaccctacaggcggaggagacccaattctctttagacacctattc	257	93.77	Golfingia margaritacea	100	BOLD	Yes	Yes	Golfingia margaritacea
280	North	77.444	27.415	160	100	November	23.11.2017	Limacina?	NA	NA	tctctcttctaatattgcgcatgctggaccgtctgtagacctagctattttttctctacatattgcaggagtctcctctattttaggggctcttaattttattactacagttattaatatacgttataaaggtttacgtcttgaacgtgtcccattatttgtgtgatctgccaaaatcacagctattcttttattactttctttacctgttttagcaggagctattactatactcctcaccgaccgtaatttaaacactgctttttttgatcctgctggaggaggagacccagttttataccagcacttattt	10	60	Harmothoe sp. CMC01	99.7	BOLD	Yes	No	Insufficient reads
281	North	77.444	27.415	160	100	November	23.11.2017	Gastropod veliger	NA	NA	tttgtctagaaatgtggctcattcagggccttctgtagatttggctattttttctttacatttagcaggggtatcttctattcttgcgtcaattaactttattactaccgcaatgaatatgcgttctagaggtcttcggttagagcgtgtgccgttgtttgtgtggtctgtggctattactgctttacttcttttgttatctttgcctgttcttgcgggagctattacaatattgttaactgatcgaaacttaaatacatctttttttgatcctgccggaggtggagatcctattttgtatcaacatcttttt	14	42.86	Phyllodoce groenlandica	100	BOLD	Yes	No	Insufficient reads
282	North	77.444	27.415	160	100	November	23.11.2017	Limacina?	NA	NA	attaagtaatataggtcacataactcaaagagtagatttttgtattttttcattacatttagcaggtttatcatcaattattggggcaatcaacataattacaacaattatagtaagacgttcaaaaataataacactatctcgaataagattatatttatgaagaatattaattactttaattttattattactatccttacctgtacttgcaggtgctatcacaatactattactagatcgtaattttaacactacattttttgatcctgtaggaggaggtgatccaatcttatttcaacatctattt	668	98.95	Limacina helicina	100	BOLD	No	Yes	Limacina helicina
283	North	77.444	27.415	160	100	November	23.11.2017	Blob 2 eyes	NA	NA	tttgtctagaaatgtggctcattcagggccttctgtagatttggctattttttctttacatttagcaggggtatcttctattcttgcgtcaattaactttattactaccgcaatgaatatgcgttctagaggtcttcggttagagcgtgtgccgttgtttgtgtggtctgtggctattactgctttacttcttttgttatctttgcctgttcttgcgggagctattacaatattgttaactgatcgaaacttaaatacatctttttttgatcctgccggaggtggagatcctattttgtatcaacatcttttt	3146	99.97	Phyllodoce groenlandica	100	BOLD	Yes	Yes	Phyllodoce groenlandica
284	North	77.444	27.415	160	100	November	23.11.2017	Gastropod veliger	NA	NA	attaagtaatataggtcacataactcaaagagtagatttttgtattttttcattacatttagcaggtttatcatcaattattggggcaatcaacataattacaacaattatagtaagacgttcaaaaataataacactatctcgaataagattatatttatgaagaatattaattactttaattttattattactatccttacctgtacttgcaggtgctatcacaatactattactagatcgtaattttaacactacattttttgatcctgtaggaggaggtgatccaatcttatttcaacatctattt	101	91.09	Limacina helicina	100	BOLD	No	Yes	Limacina helicina
285	North	77.444	27.415	160	100	November	23.11.2017	Polychaete juvenile 1	NA	NA	actaagatcgttagtaggacataacaaccactctgttgatctggctattttttctttacacttagctggtattaggtctattttaggtgcagtaaattttattactactatcttaaatatacgagcccctggagttagctgagaacgactatctctatttgtgtggtctcttttagtaacaacagttcttctacttttatctcttcctgtattggcaggagctatcactatactcctcactgaccgtaatttcaacacagggttctttgaccctggggccggtggagaccctatcttatttcaacatttattt	2521	99.68	Clione limacina	99.7	BOLD	No	No	Unknown
286	North	77.444	27.415	160	100	November	23.11.2017	Blob spines	NA	NA	attaagcacttctttcatgagcttatcaccttcaagtacaggaaatcttatctttggtttattaatctctggtatatcctcatgtctcacatctcttaatttctatacaacaattctaaatctgagatcttattatctgaatttaaagactatgccattattcccttgggctctcttcattacaggaggaatgcttttattaacattaccaatcttatcaggagctcttctaatggtcttggctgatcttcattctaatacacttttctttgaaccaatctttggaggagatcctatattctatcaacacttattt	332	35.54	Thoracosphaera heimii	96.8	BLAST	No	No	Insufficient reads
287	North	77.444	27.415	160	100	November	23.11.2017	Gastropod veliger	NA	NA	attaagtaatataggtcacataactcaaagagtagatttttgtattttttcattacatttagcaggtttatcatcaattattggggcaatcaacataattacaacaattatagtaagacgttcaaaaataataacactatctcgaataagattatatttatgaagaatattaattactttaattttattattactatccttacctgtacttgcaggtgctatcacaatactattactagatcgtaattttaacactacattttttgatcctgtaggaggaggtgatccaatcttatttcaacatctattt	1	100	Limacina helicina	100	BOLD	No	Yes	Insufficient reads
288	North	77.444	27.415	160	100	November	23.11.2017	Gastropod veliger	NA	NA	cttgagaagtgcaggtcatgtaacacaaagtgttgatttttgtattttttctctacatttagcaggactttcttcaatcattggagcaatcaatataattacaacaattctaattagtcgacgggtaagactatctcgaataagtttatacttatgaagcatactcatcacattaattttacttttattatcattaccggttttagcaggtgcaattactatactgttaatagaccgtaattttaatacaactttttttgatcctgtaggagggggtgatcctgtattatttcaacatttattt	12	83.33	Limacina retroversa	96.9	BOLD	No	Yes	Limacina retroversa 96.9 %
289	North	77.444	27.415	160	100	November	23.11.2017	Polychaete juvenile 2	NA	NA	tttgtctagaaatgtggctcattcagggccttctgtagatttggctattttttctttacatttagcaggggtatcttctattcttgcgtcaattaactttattactaccgcaatgaatatgcgttctagaggtcttcggttagagcgtgtgccgttgtttgtgtggtctgtggctattactgctttacttcttttgttatctttgcctgttcttgcgggagctattacaatattgttaactgatcgaaacttaaatacatctttttttgatcctgccggaggtggagatcctattttgtatcaacatcttttt	3558	99.94	Phyllodoce groenlandica	100	BOLD	Yes	Yes	Phyllodoce groenlandica
290	North	77.444	27.415	160	100	November	23.11.2017	Gastropod veliger	NA	NA	attaagtaatataggtcacataactcaaagagtagatttttgtattttttcattacatttagcaggtttatcatcaattattggggcaatcaacataattacaacaattatagtaagacgttcaaaaataataacactatctcgaataagattatatttatgaagaatattaattactttaattttattattactatccttacctgtacttgcaggtgctatcacaatactattactagatcgtaattttaacactacattttttgatcctgtaggaggaggtgatccaatcttatttcaacatctattt	1	100	Limacina helicina	100	BOLD	No	Yes	Insufficient reads
291	North	77.444	27.415	160	100	November	23.11.2017	Gastropod veliger	NA	NA	actttctaggtctattgctcatgcaggtgggtgtgtagatctcgtaattttttctcttcatttggctggagcttcatctattctagcatctattaattttattgctacaattatcaaaatgcgtgctccaggtatgagaatggattatcttcctctttttatttggtctatacttataactactgttttattattgttgtctttgccggtcttggctggggctatcacaatgttattaactgatcgtaatatcaacacaacattttttgatcccaccggagggggggatcctatcttgttccaacatttgttt	12	100	Ophiacantha bidentata	100	BOLD	Yes	No	Unknown
292	North	77.444	27.415	160	100	November	23.11.2017	Gastropod veliger	NA	NA	actatctgggccagtcgcccatgcaggaggatgtgttgatttagctatattttctcttcatttagctggtgcatcttcgataatggcctctataaaatttattacaacaataattaatatgcgagcacctggaatgacaatggatcgaactcctttatttgtttgatcaattttaataaccacatttcttcttttattatctcttcctgttttagctggagcaattactatgttattaacagatcgaaaaattaaaacttctttttttgatccaacaggaggaggagatccaatcttattccaacatttattt	20	50	Ophiura robusta	100	BOLD	Yes	No	Insufficient reads
293	North	77.444	27.415	160	100	November	23.11.2017	Ball small	NA	NA	tctagcaaatgctattgcccatgcaggcccatcagtagaccttgcaatcttctcccttcacttagccggtgtcagctccattcttgcctcgctgaactttatcactacagtatataatatacgtggccatggtttctgaatattccgtgttccactatttgtctgggccattatacttacaacaatccttcttcttcttgccttgcctgttctagcaggagcgattactatactattaaccgaccgcaacctaaacacctgcttctttgaccctacaggcggaggagacccaattctctttagacacctattc	3087	99.45	Golfingia margaritacea	100	BOLD	Yes	Yes	Golfingia margaritacea
294	North	77.444	27.415	160	100	November	23.11.2017	Ball small	NA	NA	tctagcaaatgctattgcccatgcaggcccatcagtagaccttgcaatcttctcccttcacttagccggtgtcagctccattcttgcctcgctgaactttatcactacagtatataatatacgtggccatggtttctgaatattccgtgttccactatttgtctgggccattatacttacaacaatccttcttcttcttgccttgcctgttctagcaggagcgattactatactattaaccgaccgcaacctaaacacctgcttctttgaccctacaggcggaggagacccaattctctttagacacctattc	995	99.5	Golfingia margaritacea	100	BOLD	Yes	Yes	Golfingia margaritacea
295	North	77.444	27.415	160	100	November	23.11.2017	Ophiopluteus	352	Posterodorsal arm	tttgtcaggccctaccgcacatgcaggaggctgcgtagacctcgcaattttttctctccacctagcaggtgcatcttcaattatggcctcaataaaatttattacaactattataaatatgcgtaggcccggcatgaccatggatcgacttccgctttttgtttgatctattttcttaacaactatattactactcctttctctgcctgttttagcaggagctattacaatgctactaactgatcgtaacataaaaacaacgttttttgatcctacaggaggaggagacccaatacttttccaacatttattt	6547	99.95	Ophiopholis aculeata	100	BOLD	Yes	Yes	Ophiopholis aculeata
296	North	77.444	27.415	160	100	November	23.11.2017	Ophiopluteus	322	Posterodorsal arm	tttgtcaggccctaccgcacatgcaggaggctgcgtagacctcgcaattttttctctccacctagcaggtgcatcttcaattatggcctcaataaaatttattacaactattataaatatgcgtaggcccggcatgaccatggatcgacttccgctttttgtttgatctattttcttaacaactatattactactcctttctctgcctgttttagcaggagctattacaatgctactaactgatcgtaacataaaaacaacgttttttgatcctacaggaggaggagacccaatacttttccaacatttattt	3244	99.94	Ophiopholis aculeata	100	BOLD	Yes	Yes	Ophiopholis aculeata
297	North	77.444	27.415	160	100	November	23.11.2017	Gastropod veliger	NA	NA	attaagtaatataggtcacataactcaaagagtagatttttgtattttttcattacatttagcaggtttatcatcaattattggggcaatcaacataattacaacaattatagtaagacgttcaaaaataataacactatctcgaataagattatatttatgaagaatattaattactttaattttattattactatccttacctgtacttgcaggtgctatcacaatactattactagatcgtaattttaacactacattttttgatcctgtaggaggaggtgatccaatcttatttcaacatctattt	10	80	Limacina helicina	100	BOLD	No	Yes	Limacina helicina
298	North	77.444	27.415	160	100	November	23.11.2017	Gastropod veliger	NA	NA	attgtcttcatacccattttctggtgcatctatagattttgtaattttctctattcatgttgctggggcttcttctattgctggagctttaaactttttaactacgggtttaaatatgcgaattaaatcaatagagttaaagcgaatacctttatttgtttgatctattattgtaactgcttttctattggtgttagcaatgcctgttttggcgggagctgttactatgcttattagggaccgtcattttaatacaactttttatgatccagcgggagggggggatcctgtattatttgtgcatctattt	6	100	Hiatella sp. K	100	BOLD	Yes	No	Insufficient reads
299	North	77.444	27.415	160	100	November	23.11.2017	Gastropod veliger	NA	NA	attaagtaatataggtcacataactcaaagagtagatttttgtattttttcattacatttagcaggtttatcatcaattattggggcaatcaacataattacaacaattatagtaagacgttcaaaaataataacactatctcgaataagattatatttatgaagaatattaattactttaattttattattactatccttacctgtacttgcaggtgctatcacaatactattactagatcgtaattttaacactacattttttgatcctgtaggaggaggtgatccaatcttatttcaacatctattt	17	76.47	Limacina helicina	100	BOLD	No	Yes	Limacina helicina
300	North	77.444	27.415	160	100	November	23.11.2017	Gastropod veliger	NA	NA	attgtcttcatacccattttctggtgcatctatagattttgtaattttctctattcatgttgctggggcttcttctattgctggagctttaaactttttaactacgggtttaaatatgcgaattaaatcaatagagttaaagcgaatacctttatttgtttgatctattattgtaactgcttttctattggtgttagcaatgcctgttttggcgggagctgttactatgcttattagggaccgtcattttaatacaactttttatgatccagcgggagggggggatcctgtattatttgtgcatctattt	2	100	Hiatella sp. K	100	BOLD	Yes	No	Insufficient reads
301	North	77.444	27.415	160	100	November	23.11.2017	Gastropod veliger	NA	NA	attaagtaatataggtcacataactcaaagagtagatttttgtattttttcattacatttagcaggtttatcatcaattattggggcaatcaacataattacaacaattatagtaagacgttcaaaaataataacactatctcgaataagattatatttatgaagaatattaattactttaattttattattactatccttacctgtacttgcaggtgctatcacaatactattactagatcgtaattttaacactacattttttgatcctgtaggaggaggtgatccaatcttatttcaacatctattt	5	60	Limacina helicina	100	BOLD	No	Yes	Insufficient reads
302	North	77.444	27.415	160	100	November	23.11.2017	Gastropod veliger	NA	NA	attaagtaatataggtcacataactcaaagagtagatttttgtattttttcattacatttagcaggtttatcatcaattattggggcaatcaacataattacaacaattatagtaagacgttcaaaaataataacactatctcgaataagattatatttatgaagaatattaattactttaattttattattactatccttacctgtacttgcaggtgctatcacaatactattactagatcgtaattttaacactacattttttgatcctgtaggaggaggtgatccaatcttatttcaacatctattt	6	100	Limacina helicina	100	BOLD	No	Yes	Insufficient reads
303	North	77.444	27.415	160	100	November	23.11.2017	Gastropod veliger	NA	NA	attaagtaatataggtcacataactcaaagagtagatttttgtattttttcattacatttagcaggtttatcatcaattattggggcaatcaacataattacaacaattatagtaagacgttcaaaaataataacactatctcgaataagattatatttatgaagaatattaattactttaattttattattactatccttacctgtacttgcaggtgctatcacaatactattactagatcgtaattttaacactacattttttgatcctgtaggaggaggtgatccaatcttatttcaacatctattt	34	82.35	Limacina helicina	100	BOLD	No	Yes	Limacina helicina
304	North	77.444	27.415	160	100	November	23.11.2017	Gastropod veliger	NA	NA	attgtcttcatacccattttctggtgcatctatagattttgtaattttctctattcatgttgctggggcttcttctattgctggagctttaaactttttaactacgggtttaaatatgcgaattaaatcaatagagttaaagcgaatacctttatttgtttgatctattattgtaactgcttttctattggtgttagcaatgcctgttttggcgggagctgttactatgcttattagggaccgtcattttaatacaactttttatgatccagcgggagggggggatcctgtattatttgtgcatctattt	1	100	Hiatella sp. K	100	BOLD	Yes	No	Insufficient reads
305	North	77.444	27.415	160	100	November	23.11.2017	Bivalve veliger	298	Anterior-posterior length	attgtcttcatacccattttctggtgcatctatagattttgtaattttctctattcatgttgctggggcttcttctattgctggagctttaaactttttaactacgggtttaaatatgcgaattaaatcaatagagttaaagcgaatacctttatttgtttgatctattattgtaactgcttttctattggtgttagcaatgcctgttttggcgggagctgttactatgcttattagggaccgtcattttaatacaactttttatgatccagcgggagggggggatcctgtattatttgtgcatctattt	744	99.87	Hiatella sp. K	100	BOLD	Yes	Yes	Hiatella sp. K
306	North	77.444	27.415	160	100	November	23.11.2017	Blob	NA	NA	ttaagtggaaatatggcccactccggaccatctgttgattttgctattttttctctccatttagctggtgtgtcatctttactaggggcagttaattttattagaacatttggcaatttacgtgggctaggaatacaattagaccaaactcctctttttgcatggtctgtattgattactactattttattattactatccttgccagttttagctggggctattactatattattaacagaccgaaacttaaatacgtccttttacgacacaggtggaggaggcgaccctattctttaccaacatttattt	3335	100	Triconia borealis	99.3	BOLD	No	Yes	Triconia borealis
307	North	77.444	27.415	160	100	November	23.11.2017	Gastropod veliger	NA	NA	attatccggaccagttgctcacgccggtggctgtgttgatttagctatattttccctccacttagctggtgcttcgtcaataatggcatcaattaactttattactacaattattaatatgcgagcgccaggtatgacaatggatcgaacccctttatttgtttgatcgattctaattacaacatttcttttattactctcattacctgttctagccggagccattaccatgttattaacagaccggaaaattaaaacatctttcttcgacccaacgggaggaggggaccctattttgttccaacacctattt	2	100	Ophiura sarsii	100	BOLD	Yes	No	Insufficient reads
308	North	77.444	27.415	160	100	November	23.11.2017	Gastropod veliger	NA	NA	tttagccggaaacctcgctcatgctggagcatctgttgatctcactatcttttctcttcatctagcaggtatttcatcaattcttggggcaattaattttattaccacaattattaatatgaaacctccagcaatttcacagtaccaaacacccctctttgtttgagcggtgctaattacagctgtactcctactattatctcttcccgtcttagcagctggtatcacaatacttctaactgaccgtaatcttaacacttctttctttgaccctgctggaggaggtgaccccattttataccaacacctattc	11	63.64	Boreogadus saida	100	BOLD	No	No	Insufficient reads
309	North	77.444	27.415	160	100	November	23.11.2017	Ball big	NA	NA	cttagcaagaaatattgcccacgcgggcccctctgtagatatggctattttctcccttcaccttgcggggatttcctctatccttggggccattaattttattactacagttattaacatacgatgaagaggattacgactagaacgaatccccctattcgtgtgaggagtagttattactactattctcctacttctatcgctcccggttcttgcgggggccatcactatattacttacagatcgcaacttaaatactgcattctttgaccctgcaggggggggcgatccaattttataccaacatctcttc	1364	99.93	Nothria conchylega CMC02	99	BOLD	Yes	Yes	Nothria conchylega CMC02
310	North	77.444	27.415	160	100	November	23.11.2017	Gastropod veliger	NA	NA	attgtcttcatacccattttctggtgcatctatagattttgtaattttctctattcatgttgctggggcttcttctattgctggagctttaaactttttaactacgggtttaaatatgcgaattaaatcaatagagttaaagcgaatacctttatttgtttgatctattattgtaactgcttttctattggtgttagcaatgcctgttttggcgggagctgttactatgcttattagggaccgtcattttaatacaactttttatgatccagcgggagggggggatcctgtattatttgtgcatctattt	16	43.75	Hiatella sp. K	100	BOLD	Yes	No	Insufficient reads
311	North	77.444	27.415	160	100	November	23.11.2017	Gastropod veliger	NA	NA	attaagtaatataggtcacataactcaaagagtagatttttgtattttttcattacatttagcaggtttatcatcaattattggggcaatcaacataattacaacaattatagtaagacgttcaaaaataataacactatctcgaataagattatatttatgaagaatattaattactttaattttattattactatccttacctgtacttgcaggtgctatcacaatactattactagatcgtaattttaacactacattttttgatcctgtaggaggaggtgatccaatcttatttcaacatctattt	58	96.55	Limacina helicina	100	BOLD	No	Yes	Limacina helicina
312	North	77.444	27.415	160	100	November	23.11.2017	Ball big	NA	NA	No sequence	0	0	No sequence	0	No sequence	No sequence	No	Insufficient reads
313	North	77.444	27.415	160	100	November	23.11.2017	Ball small	NA	NA	tctagcaaatgctattgcccatgcaggcccatcagtagaccttgcaatcttctcccttcacttagccggtgtcagctccattcttgcctcgctgaactttatcactacagtatataatatacgtggccatggtttctgaatattccgtgttccactatttgtctgggccattatacttacaacaatccttcttcttcttgccttgcctgttctagcaggagcgattactatactattaaccgaccgcaacctaaacacctgcttctttgaccctacaggcggaggagacccaattctctttagacacctattc	3727	99.62	Golfingia margaritacea	100	BOLD	Yes	Yes	Golfingia margaritacea
314	North	77.444	27.415	160	100	November	23.11.2017	Gastropod veliger	NA	NA	tttatctgggccagtagcacacgcaggtggttgtgtagacttagcaatattttctttacatttagctggtgcttcttctataatggcttcaataaattttattacaacaataataaatatgcgagctcccggtatgacaatggaccgaactcccttatttgtttgatcaatttttattacaacttttttattattattatcactaccagttttagctggggcaattacaatgcttcttactgaccgtaaaattaaaacttctttctttgaccccacaggagggggagaccctatattatttcaacatttattt	17	76.47	Ophiocten sericeum	100	BOLD	Yes	No	Unknown
315	North	77.444	27.415	160	100	November	23.11.2017	Ball big	NA	NA	tctatcaggggctattgggcatggtggatgttctgtggatttggctattttttctttgcatttagcagggatgtcttctcttcttggtgcaatcaattttattactactatttttaatatgcggtctccagcgatgactttagatcggttaagattatttgtgtgatctgttcttgttactgcttttttattattactttctttacctgttttagctggggcaattactatgctgcttacagaccggaattttaatactaggttctttgacccagccggtgggggagacccaattttgtaccagcatttattt	23	82.61	Dendronotus dalli	99.7	BOLD	Yes	No	Unknown
316	North	77.444	27.415	160	100	November	23.11.2017	Ball big	NA	NA	attagcaggaaatatatctcattcaggcccctcagtagacctagcaattttttcattacatcttgctggaacatcatcaatcctaggatcaattaattttatttctacaattattaatatacgggtagatgcaatacggctagaacgagttccattatttgtctgatccttaaaagtaacaacaatccttttactattatcgcttcctgtactagctggagcaattactatattgctcacagatcgaaacctaaacacctccttttttgaccccgcaggcggtggagacccggtattatatcaacatttattc	2316	99.57	Scoletoma fragilis CMC01	100	BOLD	Yes	Yes	Scoletoma fragilis CMC01
317	North	77.444	27.415	160	100	November	23.11.2017	Ball big	NA	NA	cttagcaagaaatattgcccacgcgggcccctctgtagatatggctattttctcccttcaccttgcggggatttcctctatccttggggccattaattttattactacagttattaacatacgatgaagaggattacgactagaacgaatccccctattcgtgtgaggagtagttattactactattctcctacttctatcgctcccggttcttgcgggggccatcactatattacttacagatcgcaacttaaatactgcattctttgaccctgcaggggggggcgatccaattttataccaacatctcttc	3417	99.74	Nothria conchylega CMC02	99	BOLD	Yes	Yes	Nothria conchylega CMC02
318	North	77.444	27.415	160	100	November	23.11.2017	Ball small	NA	NA	tctagcaaatgctattgcccatgcaggcccatcagtagaccttgcaatcttctcccttcacttagccggtgtcagctccattcttgcctcgctgaactttatcactacagtatataatatacgtggccatggtttctgaatattccgtgttccactatttgtctgggccattatacttacaacaatccttcttcttcttgccttgcctgttctagcaggagcgattactatactattaaccgaccgcaacctaaacacctgcttctttgaccctacaggcggaggagacccaattctctttagacacctattc	2571	99.81	Golfingia margaritacea	100	BOLD	Yes	Yes	Golfingia margaritacea
319	North	77.444	27.415	160	100	November	23.11.2017	Ball small	NA	NA	attgtcttcatacccattttctggtgcatctatagattttgtaattttctctattcatgttgctggggcttcttctattgctggagctttaaactttttaactacgggtttaaatatgcgaattaaatcaatagagttaaagcgaatacctttatttgtttgatctattattgtaactgcttttctattggtgttagcaatgcctgttttggcgggagctgttactatgcttattagggaccgtcattttaatacaactttttatgatccagcgggagggggggatcctgtattatttgtgcatctattt	8	100	Hiatella sp. K	100	BOLD	Yes	No	Insufficient reads
320	North	77.444	27.415	160	100	November	23.11.2017	Ball big	NA	NA	tttatctagaaatttagctcattctggtccttcagttgatatagctattttttcattacatatagcaggtgtttcttctattttgggagcaattaattttattgtaactattatatttaatcgtgtaattggtataagatttaaacgtattcctttatttgtttggtctgtattaattactgctattttattattattagcattacctgttttagcgggtgtaattactatattgttaactgatcgtaatttaaatactagattttttgatccagcaggaggaggagatcctattttatttcaacatttattt	3863	99.51	Sphaerodorum flavum	100	BOLD	Yes	Yes	Sphaerodorum flavum
321	North	77.444	27.415	160	100	November	23.11.2017	Gastropod veliger	NA	NA	attaagtaatataggtcacataactcaaagagtagatttttgtattttttcattacatttagcaggtttatcatcaattattggggcaatcaacataattacaacaattatagtaagacgttcaaaaataataacactatctcgaataagattatatttatgaagaatattaattactttaattttattattactatccttacctgtacttgcaggtgctatcacaatactattactagatcgtaattttaacactacattttttgatcctgtaggaggaggtgatccaatcttatttcaacatctattt	5	60	Limacina helicina	100	BOLD	No	Yes	Insufficient reads
322	North	77.444	27.415	160	100	November	23.11.2017	Ophiopluteus	478	Posterodorsal arm	actatctgggccagtcgcccatgcaggaggatgtgttgatttagctatattttctcttcatttagctggtgcatcttcgataatggcctctataaaatttattacaacaataattaatatgcgagcacctggaatgacaatggatcgaactcctttatttgtttgatcaattttaataaccacatttcttcttttattatctcttcctgttttagctggagcaattactatgttattaacagatcgaaaaattaaaacttctttttttgatccaacaggaggaggagatccaatcttattccaacatttattt	2603	99.39	Ophiura robusta	100	BOLD	Yes	Yes	Ophiura robusta
323	North	77.444	27.415	160	100	November	23.11.2017	Ophiopluteus	708	Posterodorsal arm	actatctgggccagtcgcccatgcaggaggatgtgttgatttagctatattttctcttcatttagctggtgcatcttcgataatggcctctataaaatttattacaacaataattaatatgcgagcacctggaatgacaatggatcgaactcctttatttgtttgatcaattttaataaccacatttcttcttttattatctcttcctgttttagctggagcaattactatgttattaacagatcgaaaaattaaaacttctttttttgatccaacaggaggaggagatccaatcttattccaacatttattt	3800	99.55	Ophiura robusta	100	BOLD	Yes	Yes	Ophiura robusta
324	North	77.444	27.415	160	100	November	23.11.2017	Gastropod veliger	NA	NA	cttagcaagaaatattgcccacgcgggcccctctgtagatatggctattttctcccttcaccttgcggggatttcctctatccttggggccattaattttattactacagttattaacatacgatgaagaggattacgactagaacgaatccccctattcgtgtgaggagtagttattactactattctcctacttctatcgctcccggttcttgcgggggccatcactatattacttacagatcgcaacttaaatactgcattctttgaccctgcaggggggggcgatccaattttataccaacatctcttc	17	58.82	Nothria conchylega CMC02	99	BOLD	Yes	No	Insufficient reads
325	North	77.444	27.415	160	100	November	23.11.2017	Ball big	NA	NA	cttagcaagaaatattgcccacgcgggcccctctgtagatatggctattttctcccttcaccttgcggggatttcctctatccttggggccattaattttattactacagttattaacatacgatgaagaggattacgactagaacgaatccccctattcgtgtgaggagtagttattactactattctcctacttctatcgctcccggttcttgcgggggccatcactatattacttacagatcgcaacttaaatactgcattctttgaccctgcaggggggggcgatccaattttataccaacatctcttc	4104	100	Nothria conchylega CMC02	99	BOLD	Yes	Yes	Nothria conchylega CMC02
326	North	77.444	27.415	160	100	November	23.11.2017	Gastropod veliger	NA	NA	attgagatcttatattttccatggaggcgcttcagttgactttacaatttttagccttcacttagctggtgtttcttcacttataggggctgtaaattttattagcacagttttgaacttacgcgcattagggatacttatagatcgcatacccttatttccttgagctgtatttattactgctattttactactcctatctctccctgtacttgcaggagcaattactatactacttaccgaccgaaatttaaacacgtctttttatgatcctataggtggaggggaccctgttttataccaacatttattt	2	100	Oithona similis	100	BOLD	No	No	Insufficient reads
327	North	77.444	27.415	160	100	November	23.11.2017	Ball big	NA	NA	tttgtctagaaatatttctcatagaggaccatctgtagatcttgctattttttcccttcatcttgctggtgtaagatctattttaggggctttaaacttcattaccacggtaattaatatacggtttaatggtatacgtttagagcgtattcctttatttgtgtgatccgtaaaaattacggctgttcttcttctcctatctcttcctgttttagcggggggtatcactatactactaaccgaccgtaatctaaacaccacttttttcgacccagcgggtggaggtgaccctattttatatcaacatttattt	3539	99.21	Dorvilleidae	87.2	BOLD	Yes	Yes	Dorvilleidae 87.2 %
328	North	77.444	27.415	160	100	November	23.11.2017	Gastropod veliger	NA	NA	tttgtcaggccctaccgcacatgcaggaggctgcgtagacctcgcaattttttctctccacctagcaggtgcatcttcaattatggcctcaataaaatttattacaactattataaatatgcgtaggcccggcatgaccatggatcgacttccgctttttgtttgatctattttcttaacaactatattactactcctttctctgcctgttttagcaggagctattacaatgctactaactgatcgtaacataaaaacaacgttttttgatcctacaggaggaggagacccaatacttttccaacatttattt	19	78.95	Ophiopholis aculeata	100	BOLD	Yes	No	Unknown
329	North	77.444	27.415	50	0	November	23.11.2017	Ball big	NA	NA	tttatctagaaatttagctcattctggtccttcagttgatatagctattttttcattacatatagcaggtgtttcttctattttgggagcaattaattttattgtaactattatatttaatcgtgtaattggtataagatttaaacgtattcctttatttgtttggtctgtattaattactgctattttattattattagcattacctgttttagcgggtgtaattactatattgttaactgatcgtaatttaaatactagattttttgatccagcaggaggaggagatcctattttatttcaacatttattt	5188	99.9	Sphaerodorum flavum	100	BOLD	Yes	Yes	Sphaerodorum flavum
330	North	77.444	27.415	50	0	November	23.11.2017	Ophiopluteus	497	Posterodorsal arm	tttgtcaggccctaccgcacatgcaggaggctgcgtagacctcgcaattttttctctccacctagcaggtgcatcttcaattatggcctcaataaaatttattacaactattataaatatgcgtaggcccggcatgaccatggatcgacttccgctttttgtttgatctattttcttaacaactatattactactcctttctctgcctgttttagcaggagctattacaatgctactaactgatcgtaacataaaaacaacgttttttgatcctacaggaggaggagacccaatacttttccaacatttattt	3860	99.9	Ophiopholis aculeata	100	BOLD	Yes	Yes	Ophiopholis aculeata
331	North	77.444	27.415	50	0	November	23.11.2017	Ophiopluteus	703	Posterodorsal arm	actatctgggccagtcgcccatgcaggaggatgtgttgatttagctatattttctcttcatttagctggtgcatcttcgataatggcctctataaaatttattacaacaataattaatatgcgagcacctggaatgacaatggatcgaactcctttatttgtttgatcaattttaataaccacatttcttcttttattatctcttcctgttttagctggagcaattactatgttattaacagatcgaaaaattaaaacttctttttttgatccaacaggaggaggagatccaatcttattccaacatttattt	3670	99.16	Ophiura robusta	100	BOLD	Yes	Yes	Ophiura robusta
332	North	77.444	27.415	50	0	November	23.11.2017	Gastropod veliger	NA	NA	attaagtaatataggtcacataactcaaagagtagatttttgtattttttcattacatttagcaggtttatcatcaattattggggcaatcaacataattacaacaattatagtaagacgttcaaaaataataacactatctcgaataagattatatttatgaagaatattaattactttaattttattattactatccttacctgtacttgcaggtgctatcacaatactattactagatcgtaattttaacactacattttttgatcctgtaggaggaggtgatccaatcttatttcaacatctattt	7	100	Limacina helicina	100	BOLD	No	Yes	Insufficient reads
333	North	77.444	27.415	50	0	November	23.11.2017	Bivalve veliger	260	Anterior-posterior length	attgtcttcatacccattttctggtgcatctatagattttgtaattttctctattcatgttgctggggcttcttctattgctggagctttaaactttttaactacgggtttaaatatgcgaattaaatcaatagagttaaagcgaatacctttatttgtttgatctattattgtaactgcttttctattggtgttagcaatgcctgttttggcgggagctgttactatgcttattagggaccgtcattttaatacaactttttatgatccagcgggagggggggatcctgtattatttgtgcatctattt	999	99.5	Hiatella sp. K	100	BOLD	Yes	Yes	Hiatella sp. K
334	North	77.444	27.415	50	0	November	23.11.2017	Bivalve veliger	232	Anterior-posterior length	attgtcttcatacccattttctggtgcatctatagattttgtaattttctctattcatgttgctggggcttcttctattgctggagctttaaactttttaactacgggtttaaatatgcgaattaaatcaatagagttaaagcgaatacctttatttgtttgatctattattgtaactgcttttctattggtgttagcaatgcctgttttggcgggagctgttactatgcttattagggaccgtcattttaatacaactttttatgatccagcgggagggggggatcctgtattatttgtgcatctattt	2115	97.78	Hiatella sp. K	100	BOLD	Yes	Yes	Hiatella sp. K
335	North	77.444	27.415	50	0	November	23.11.2017	Polychaete juvenile	NA	NA	attatccagaaatctcgcccatgccggaccctccgtagacctggccattttctcgttacacctggcgggagtgtcatcaattttggcctccttaaactttatcacaacaaccattaacatgcgagttgaaggaatacaaatagagcgggtaccactgtttatttgatctattctaattacaactattttactgttactatccctccccgttctcgccggagcaattacaatactacttacggaccgaaacttaaataccgcgttcttcgaccccgcaggaggaggagacccagtgctctaccagcacttattc	4297	99.7	Paramphinome jeffreysii	100	BOLD	Yes	Yes	Paramphinome jeffreysii
336	North	77.444	27.415	50	0	November	23.11.2017	Gastropod veliger	NA	NA	attaagtaatataggtcacataactcaaagagtagatttttgtattttttcattacatttagcaggtttatcatcaattattggggcaatcaacataattacaacaattatagtaagacgttcaaaaataataacactatctcgaataagattatatttatgaagaatattaattactttaattttattattactatccttacctgtacttgcaggtgctatcacaatactattactagatcgtaattttaacactacattttttgatcctgtaggaggaggtgatccaatcttatttcaacatctattt	45	91.11	Limacina helicina	100	BOLD	No	Yes	Limacina helicina
337	North	77.444	27.415	50	0	November	23.11.2017	Gastropod veliger	NA	NA	tctttctagaaatattgcacatgctggtggttctgtagatttggctattttttctctacatcttgctggtatttcttctattttgggtgccattaattttattactactattatcaatatgcgctggtacggaatgcagtttgagcgcctatctctttttgtttgatcggtaaagattactgcagtgctattgttattatcccttcctgtattggctggggcgattactatgcttttaactgatcgtaattttaatacttctttttttgaccctgctggtggtggtgacccaattctttatcagcatttgttt	1	100	Monostilifera	91.6	BOLD	Yes	No	Insufficient reads
338	North	77.444	27.415	50	0	November	23.11.2017	Bivalve veliger	294	Anterior-posterior length	attgtcttcatacccattttctggtgcatctatagattttgtaattttctctattcatgttgctggggcttcttctattgctggagctttaaactttttaactacgggtttaaatatgcgaattaaatcaatagagttaaagcgaatacctttatttgtttgatctattattgtaactgcttttctattggtgttagcaatgcctgttttggcgggagctgttactatgcttattagggaccgtcattttaatacaactttttatgatccagcgggagggggggatcctgtattatttgtgcatctattt	2307	99.57	Hiatella sp. K	100	BOLD	Yes	Yes	Hiatella sp. K
339	North	77.444	27.415	50	0	November	23.11.2017	Bivalve veliger	225	Anterior-posterior length	attgtcttcatacccattttctggtgcatctatagattttgtaattttctctattcatgttgctggggcttcttctattgctggagctttaaactttttaactacgggtttaaatatgcgaattaaatcaatagagttaaagcgaatacctttatttgtttgatctattattgtaactgcttttctattggtgttagcaatgcctgttttggcgggagctgttactatgcttattagggaccgtcattttaatacaactttttatgatccagcgggagggggggatcctgtattatttgtgcatctattt	420	94.05	Hiatella sp. K	100	BOLD	Yes	Yes	Hiatella sp. K
340	North	77.444	27.415	50	0	November	23.11.2017	Ball small	NA	NA	No sequence	0	0	No sequence	0	No sequence	No sequence	No	Insufficient reads
341	North	77.444	27.415	50	0	November	23.11.2017	Gastropod veliger	NA	NA	attaagtaatataggtcacataactcaaagagtagatttttgtattttttcattacatttagcaggtttatcatcaattattggggcaatcaacataattacaacaattatagtaagacgttcaaaaataataacactatctcgaataagattatatttatgaagaatattaattactttaattttattattactatccttacctgtacttgcaggtgctatcacaatactattactagatcgtaattttaacactacattttttgatcctgtaggaggaggtgatccaatcttatttcaacatctattt	6	33.33	Limacina helicina	100	BOLD	No	Yes	Insufficient reads
342	North	77.444	27.415	50	0	November	23.11.2017	Gastropod veliger	NA	NA	tttgtctagaaatgtggctcattcagggccttctgtagatttggctattttttctttacatttagcaggggtatcttctattcttgcgtcaattaactttattactaccgcaatgaatatgcgttctagaggtcttcggttagagcgtgtgccgttgtttgtgtggtctgtggctattactgctttacttcttttgttatctttgcctgttcttgcgggagctattacaatattgttaactgatcgaaacttaaatacatctttttttgatcctgccggaggtggagatcctattttgtatcaacatcttttt	28	71.43	Phyllodoce groenlandica	100	BOLD	Yes	No	Insufficient reads
343	North	77.444	27.415	50	0	November	23.11.2017	Vase	NA	NA	actaagatcgttagtaggacataacaaccactctgttgatctggctattttttctttacacttagctggtattaggtctattttaggtgcagtaaattttattactactatcttaaatatacgagcccctggagttagctgagaacgactatctctatttgtgtggtctcttttagtaacaacagttcttctacttttatctcttcctgtattggcaggagctatcactatactcctcactgaccgtaatttcaacacagggttctttgaccctggggccggtggagaccctatcttatttcaacatttattt	1633	99.76	Clione limacina	99.7	BOLD	No	No	Unknown
344	North	77.444	27.415	50	0	November	23.11.2017	Ball big	NA	NA	cttagcaagaaatattgcccacgcgggcccctctgtagatatggctattttctcccttcaccttgcggggatttcctctatccttggggccattaattttattactacagttattaacatacgatgaagaggattacgactagaacgaatccccctattcgtgtgaggagtagttattactactattctcctacttctatcgctcccggttcttgcgggggccatcactatattacttacagatcgcaacttaaatactgcattctttgaccctgcaggggggggcgatccaattttataccaacatctcttc	859	99.53	Nothria conchylega CMC02	99	BOLD	Yes	Yes	Nothria conchylega CMC02
345	North	77.444	27.415	50	0	November	23.11.2017	Bivalve veliger	248	Anterior-posterior length	tctttcaagaaatttaatagggcattctggtgctgcgggagactttttaattttatctcttcatatcggaggtgcttcatctattatagcatccttaaatttttatagaacgtgaggaaatatgcgtgcaggatgtcatcccttccatcgtgtaccccttttttgtagttctattggggtcacaaggtttcttttaattctagctatgcctgtcttagcaggggcattaacaatactgttaacagatcgcaattttaatactgctttttttgatcctaccggtttaggggaccctatattgtttgttcatttattt	171	97.66	Mya truncata	100	BLAST	Yes	Yes	Mya truncata
346	North	77.444	27.415	50	0	November	23.11.2017	Bivalve veliger	254	Anterior-posterior length	tctttcaagaaatttaatagggcattctggtgctgcgggagactttttaattttatctcttcatatcggaggtgcttcatctattatagcatccttaaatttttatagaacgtgaggaaatatgcgtgcaggatgtcatcccttccatcgtgtaccccttttttgtagttctattggggtcacaaggtttcttttaattctagctatgcctgtcttagcaggggcattaacaatactgttaacagatcgcaattttaatactgctttttttgatcctaccggtttaggggaccctatattgtttgttcatttattt	161	96.27	Mya truncata	100	BLAST	Yes	Yes	Mya truncata
347	North	77.444	27.415	50	0	November	23.11.2017	Nudibranch	NA	NA	tctttctggtcctataggccacgggggttgttctgtagatctggctattttttctttacatttagcgggtatgtcttctcttttaggtgctattaactttattacaactatttttaatatacggtctcctgagataacatgagatcgattaagtttatttgtttgatcggtgttagttacggcttttttactcttgttatcacttcctgtgctagctggggctattacgatgttacttacggatcgtaattttaatactaggttctttgatcctgcaggtggaggagatcctattttatatcaacatctgttt	1388	99.86	Eubranchus rupium	99.7	BOLD	Yes	Yes	Eubranchus rupium
348	North	77.444	27.415	50	0	November	23.11.2017	Gastropod veliger	NA	NA	actatctgggccagtcgcccatgcaggaggatgtgttgatttagctatattttctcttcatttagctggtgcatcttcgataatggcctctataaaatttattacaacaataattaatatgcgagcacctggaatgacaatggatcgaactcctttatttgtttgatcaattttaataaccacatttcttcttttattatctcttcctgttttagctggagcaattactatgttattaacagatcgaaaaattaaaacttctttttttgatccaacaggaggaggagatccaatcttattccaacatttattt	15	80	Ophiura robusta	100	BOLD	Yes	No	Unknown
349	North	77.444	27.415	50	0	November	23.11.2017	Bivalve veliger	224	Anterior-posterior length	tctttcaagaaatttaatagggcattctggtgctgcgggagactttttaattttatctcttcatatcggaggtgcttcatctattatagcatccttaaatttttatagaacgtgaggaaatatgcgtgcaggatgtcatcccttccatcgtgtaccccttttttgtagttctattggggtcacaaggtttcttttaattctagctatgcctgtcttagcaggggcattaacaatactgttaacagatcgcaattttaatactgctttttttgatcctaccggtttaggggaccctatattgtttgttcatttattt	139	94.96	Mya truncata	100	BLAST	Yes	Yes	Mya truncata
350	North	77.444	27.415	50	0	November	23.11.2017	Gastropod veliger	NA	NA	attaagtaatataggtcacataactcaaagagtagatttttgtattttttcattacatttagcaggtttatcatcaattattggggcaatcaacataattacaacaattatagtaagacgttcaaaaataataacactatctcgaataagattatatttatgaagaatattaattactttaattttattattactatccttacctgtacttgcaggtgctatcacaatactattactagatcgtaattttaacactacattttttgatcctgtaggaggaggtgatccaatcttatttcaacatctattt	290	99.31	Limacina helicina	100	BOLD	No	Yes	Limacina helicina
351	North	77.444	27.415	50	0	November	23.11.2017	Bivalve veliger	237	Anterior-posterior length	tctttcaagaaatttaatagggcattctggtgctgcgggagactttttaattttatctcttcatatcggaggtgcttcatctattatagcatccttaaatttttatagaacgtgaggaaatatgcgtgcaggatgtcatcccttccatcgtgtaccccttttttgtagttctattggggtcacaaggtttcttttaattctagctatgcctgtcttagcaggggcattaacaatactgttaacagatcgcaattttaatactgctttttttgatcctaccggtttaggggaccctatattgtttgttcatttattt	64	89.06	Mya truncata	100	BLAST	Yes	Yes	Mya truncata
352	North	77.444	27.415	50	0	November	23.11.2017	Bivalve veliger	244	Anterior-posterior length	attgtcttcatacccattttctggtgcatctatagattttgtaattttctctattcatgttgctggggcttcttctattgctggagctttaaactttttaactacgggtttaaatatgcgaattaaatcaatagagttaaagcgaatacctttatttgtttgatctattattgtaactgcttttctattggtgttagcaatgcctgttttggcgggagctgttactatgcttattagggaccgtcattttaatacaactttttatgatccagcgggagggggggatcctgtattatttgtgcatctattt	2281	99.43	Hiatella sp. K	100	BOLD	Yes	Yes	Hiatella sp. K
353	North	77.444	27.415	50	0	November	23.11.2017	Gastropod veliger	NA	NA	attaagtaatataggtcacataactcaaagagtagatttttgtattttttcattacatttagcaggtttatcatcaattattggggcaatcaacataattacaacaattatagtaagacgttcaaaaataataacactatctcgaataagattatatttatgaagaatattaattactttaattttattattactatccttacctgtacttgcaggtgctatcacaatactattactagatcgtaattttaacactacattttttgatcctgtaggaggaggtgatccaatcttatttcaacatctattt	4	75	Limacina helicina	100	BOLD	No	Yes	Insufficient reads
354	North	77.444	27.415	50	0	November	23.11.2017	Nemertea	NA	NA	tttgtctagaaatgtggctcattcagggccttctgtagatttggctattttttctttacatttagcaggggtatcttctattcttgcgtcaattaactttattactaccgcaatgaatatgcgttctagaggtcttcggttagagcgtgtgccgttgtttgtgtggtctgtggctattactgctttacttcttttgttatctttgcctgttcttgcgggagctattacaatattgttaactgatcgaaacttaaatacatctttttttgatcctgccggaggtggagatcctattttgtatcaacatcttttt	3998	99.95	Phyllodoce groenlandica	100	BOLD	Yes	Yes	Phyllodoce groenlandica
355	North	77.444	27.415	50	0	November	23.11.2017	Ball small	NA	NA	tttgtctagaaatgtggctcattcagggccttctgtagatttggctattttttctttacatttagcaggggtatcttctattcttgcgtcaattaactttattactaccgcaatgaatatgcgttctagaggtcttcggttagagcgtgtgccgttgtttgtgtggtctgtggctattactgctttacttcttttgttatctttgcctgttcttgcgggagctattacaatattgttaactgatcgaaacttaaatacatctttttttgatcctgccggaggtggagatcctattttgtatcaacatcttttt	27	100	Phyllodoce groenlandica	100	BOLD	Yes	Yes	Phyllodoce groenlandica
356	North	77.444	27.415	50	0	November	23.11.2017	Bivalve veliger	221	Anterior-posterior length	attgtcttcatacccattttctggtgcatctatagattttgtaattttctctattcatgttgctggggcttcttctattgctggagctttaaactttttaactacgggtttaaatatgcgaattaaatcaatagagttaaagcgaatacctttatttgtttgatctattattgtaactgcttttctattggtgttagcaatgcctgttttggcgggagctgttactatgcttattagggaccgtcattttaatacaactttttatgatccagcgggagggggggatcctgtattatttgtgcatctattt	1178	99.41	Hiatella sp. K	100	BOLD	Yes	Yes	Hiatella sp. K
357	North	77.444	27.415	50	0	November	23.11.2017	Bivalve veliger	278	Anterior-posterior length	attgtcttcatacccattttctggtgcatctatagattttgtaattttctctattcatgttgctggggcttcttctattgctggagctttaaactttttaactacgggtttaaatatgcgaattaaatcaatagagttaaagcgaatacctttatttgtttgatctattattgtaactgcttttctattggtgttagcaatgcctgttttggcgggagctgttactatgcttattagggaccgtcattttaatacaactttttatgatccagcgggagggggggatcctgtattatttgtgcatctattt	2720	99.41	Hiatella sp. K	100	BOLD	Yes	Yes	Hiatella sp. K
358	North	77.444	27.415	50	0	November	23.11.2017	Ophiopluteus	716	Posterodorsal arm	actatctgggccagtcgcccatgcaggaggatgtgttgatttagctatattttctcttcatttagctggtgcatcttcgataatggcctctataaaatttattacaacaataattaatatgcgagcacctggaatgacaatggatcgaactcctttatttgtttgatcaattttaataaccacatttcttcttttattatctcttcctgttttagctggagcaattactatgttattaacagatcgaaaaattaaaacttctttttttgatccaacaggaggaggagatccaatcttattccaacatttattt	3073	99.58	Ophiura robusta	100	BOLD	Yes	Yes	Ophiura robusta
359	North	77.444	27.415	50	0	November	23.11.2017	Ball big	NA	NA	attgtcttcatacccattttctggtgcatctatagattttgtaattttctctattcatgttgctggggcttcttctattgctggagctttaaactttttaactacgggtttaaatatgcgaattaaatcaatagagttaaagcgaatacctttatttgtttgatctattattgtaactgcttttctattggtgttagcaatgcctgttttggcgggagctgttactatgcttattagggaccgtcattttaatacaactttttatgatccagcgggagggggggatcctgtattatttgtgcatctattt	3	100	Hiatella sp. K	100	BOLD	Yes	No	Insufficient reads
360	North	77.444	27.415	50	0	November	23.11.2017	Gastropod veliger 2	NA	NA	tctctcaggtgcaattgggcatggaggatgttcagtagatttggctattttttccttacatctggcgggtatgtcttctttgttaggtgctattaattttattactactatttttaatatgcggtctccttctataactatagatcgattaagtttatttgtgtggtcagtattagttactgccttcctattactactttctcttcctgtgttggctggggctattacgatacttttaacagatcgtaattttaacactagatttttcgatccagcaggagggggtgatcctattctatatcaacacttattt	4262	99.32	Nudibranchia	98.4	BOLD	Yes	Yes	Nudibranchia
361	North	77.444	27.415	50	0	November	23.11.2017	Nemertea	NA	NA	tttgtctagaaatgtggctcattcagggccttctgtagatttggctattttttctttacatttagcaggggtatcttctattcttgcgtcaattaactttattactaccgcaatgaatatgcgttctagaggtcttcggttagagcgtgtgccgttgtttgtgtggtctgtggctattactgctttacttcttttgttatctttgcctgttcttgcgggagctattacaatattgttaactgatcgaaacttaaatacatctttttttgatcctgccggaggtggagatcctattttgtatcaacatcttttt	5684	99.88	Phyllodoce groenlandica	100	BOLD	Yes	Yes	Phyllodoce groenlandica
362	North	77.444	27.415	50	0	November	23.11.2017	Ophiopluteus	1260	Posterodorsal arm	tttatctgggccagtagcacacgcaggtggttgtgtagacttagcaatattttctttacatttagctggtgcttcttctataatggcttcaataaattttattacaacaataataaatatgcgagctcccggtatgacaatggaccgaactcccttatttgtttgatcaatttttattacaacttttttattattattatcactaccagttttagctggggcaattacaatgcttcttactgaccgtaaaattaaaacttctttctttgaccccacaggagggggagaccctatattatttcaacatttattt	2521	99.52	Ophiocten sericeum	100	BOLD	Yes	Yes	Ophiocten sericeum
363	North	77.444	27.415	50	0	November	23.11.2017	Ophiopluteus	1053	Posterodorsal arm	actatctgggccagtcgcccatgcaggaggatgtgttgatttagctatattttctcttcatttagctggtgcatcttcgataatggcctctataaaatttattacaacaataattaatatgcgagcacctggaatgacaatggatcgaactcctttatttgtttgatcaattttaataaccacatttcttcttttattatctcttcctgttttagctggagcaattactatgttattaacagatcgaaaaattaaaacttctttttttgatccaacaggaggaggagatccaatcttattccaacatttattt	3623	99.03	Ophiura robusta	100	BOLD	Yes	Yes	Ophiura robusta
364	North	77.444	27.415	50	0	November	23.11.2017	Unknown	NA	NA	tctcacgtctattgaatttttaagggatccttctatagatatagcgattttttctttgcatttgggaggtgtgtcttcaatcgcagcaaggttaaattttgcaaggacgtgtgttaatatgcgacaggaggggcgtggcttgcataagatccctatgttccctatctctctggggattactgccttattattaatcattgctataccagttttggcaggggctctaaccatgttgctacttgatcgaaattttgctactaggttttttgaccctgtgggggggggtgatcctattttgtttatacatctattt	1962	97.66	Serripes groenlandicus	94.1	BOLD	Yes	No	Unknown
365	North	77.444	27.415	50	0	November	23.11.2017	Ophiopluteus	728	Posterodorsal arm	actatctgggccagtcgcccatgcaggaggatgtgttgatttagctatattttctcttcatttagctggtgcatcttcgataatggcctctataaaatttattacaacaataattaatatgcgagcacctggaatgacaatggatcgaactcctttatttgtttgatcaattttaataaccacatttcttcttttattatctcttcctgttttagctggagcaattactatgttattaacagatcgaaaaattaaaacttctttttttgatccaacaggaggaggagatccaatcttattccaacatttattt	6408	99.77	Ophiura robusta	100	BOLD	Yes	Yes	Ophiura robusta
366	North	77.444	27.415	50	0	November	23.11.2017	Polychaete juvenile	NA	NA	tcttgcttctaatattgctcattcaggaccttcagttgatttagctattttttctttacatattgcaggagtttcttctattttaggagctctaaattttattactactgttattaatatacgatataaaggattacgacttgaacgtgtaccgctttttgtgtgagctgctaaaattacagcaattctattattattatctttacctgtattagcaggtgctattaccatacttttaactgatcgtaatcttaacaccgctttctttgaccccgcaggtggaggagatcccgttctttaccaacatttattt	5834	99.93	Eunoe oerstedi CMC02	100	BOLD	Yes	Yes	Eunoe oerstedi CMC02
367	North	77.444	27.415	50	0	November	23.11.2017	Gastropod veliger	NA	NA	No sequence	0	0	No sequence	0	No sequence	No sequence	No	Insufficient reads
368	North	77.444	27.415	50	0	November	23.11.2017	Ophiopluteus	1194	Posterodorsal arm	actatctgggccagtcgcccatgcaggaggatgtgttgatttagctatattttctcttcatttagctggtgcatcttcgataatggcctctataaaatttattacaacaataattaatatgcgagcacctggaatgacaatggatcgaactcctttatttgtttgatcaattttaataaccacatttcttcttttattatctcttcctgttttagctggagcaattactatgttattaacagatcgaaaaattaaaacttctttttttgatccaacaggaggaggagatccaatcttattccaacatttattt	3632	99.12	Ophiura robusta	100	BOLD	Yes	Yes	Ophiura robusta
369	North	77.444	27.415	50	0	November	23.11.2017	Ball small	NA	NA	tttgtctagaaatgtggctcattcagggccttctgtagatttggctattttttctttacatttagcaggggtatcttctattcttgcgtcaattaactttattactaccgcaatgaatatgcgttctagaggtcttcggttagagcgtgtgccgttgtttgtgtggtctgtggctattactgctttacttcttttgttatctttgcctgttcttgcgggagctattacaatattgttaactgatcgaaacttaaatacatctttttttgatcctgccggaggtggagatcctattttgtatcaacatcttttt	3	66.67	Phyllodoce groenlandica	100	BOLD	Yes	Yes	Insufficient reads
370	North	77.444	27.415	50	0	November	23.11.2017	Bivalve veliger	232	Anterior-posterior length	tctttcaagaaatttaatagggcattctggtgctgcgggagactttttaattttatctcttcatatcggaggtgcttcatctattatagcatccttaaatttttatagaacgtgaggaaatatgcgtgcaggatgtcatcccttccatcgtgtaccccttttttgtagttctattggggtcacaaggtttcttttaattctagctatgcctgtcttagcaggggcattaacaatactgttaacagatcgcaattttaatactgctttttttgatcctaccggtttaggggaccctatattgtttgttcatttattt	186	98.39	Mya truncata	100	BLAST	Yes	Yes	Mya truncata
371	North	77.444	27.415	50	0	November	23.11.2017	Bivalve veliger	248	Anterior-posterior length	attgtcttcatacccattttctggtgcatctatagattttgtaattttctctattcatgttgctggggcttcttctattgctggagctttaaactttttaactacgggtttaaatatgcgaattaaatcaatagagttaaagcgaatacctttatttgtttgatctattattgtaactgcttttctattggtgttagcaatgcctgttttggcgggagctgttactatgcttattagggaccgtcattttaatacaactttttatgatccagcgggagggggggatcctgtattatttgtgcatctattt	1239	98.95	Hiatella sp. K	100	BOLD	Yes	Yes	Hiatella sp. K
372	North	77.444	27.415	50	0	November	23.11.2017	Bivalve veliger	257	Anterior-posterior length	tctttcaagaaatttaatagggcattctggtgctgcgggagactttttaattttatctcttcatatcggaggtgcttcatctattatagcatccttaaatttttatagaacgtgaggaaatatgcgtgcaggatgtcatcccttccatcgtgtaccccttttttgtagttctattggggtcacaaggtttcttttaattctagctatgcctgtcttagcaggggcattaacaatactgttaacagatcgcaattttaatactgctttttttgatcctaccggtttaggggaccctatattgtttgttcatttattt	495	95.96	Mya truncata	100	BLAST	Yes	Yes	Mya truncata
373	North	77.444	27.415	50	0	November	23.11.2017	Ophiopluteus	415	Posterodorsal arm	tttgtcaggccctaccgcacatgcaggaggctgcgtagacctcgcaattttttctctccacctagcaggtgcatcttcaattatggcctcaataaaatttattacaactattataaatatgcgtaggcccggcatgaccatggatcgacttccgctttttgtttgatctattttcttaacaactatattactactcctttctctgcctgttttagcaggagctattacaatgctactaactgatcgtaacataaaaacaacgttttttgatcctacaggaggaggagacccaatacttttccaacatttattt	7024	99.7	Ophiopholis aculeata	100	BOLD	Yes	Yes	Ophiopholis aculeata
374	North	77.444	27.415	50	0	November	23.11.2017	Bivalve veliger	255	Anterior-posterior length	tctttcaagaaatttaatagggcattctggtgctgcgggagactttttaattttatctcttcatatcggaggtgcttcatctattatagcatccttaaatttttatagaacgtgaggaaatatgcgtgcaggatgtcatcccttccatcgtgtaccccttttttgtagttctattggggtcacaaggtttcttttaattctagctatgcctgtcttagcaggggcattaacaatactgttaacagatcgcaattttaatactgctttttttgatcctaccggtttaggggaccctatattgtttgttcatttattt	199	96.48	Mya truncata	100	BLAST	Yes	Yes	Mya truncata
375	North	77.444	27.415	50	0	November	23.11.2017	Nemertea	NA	NA	tttgtctagaaatgtggctcattcagggccttctgtagatttggctattttttctttacatttagcaggggtatcttctattcttgcgtcaattaactttattactaccgcaatgaatatgcgttctagaggtcttcggttagagcgtgtgccgttgtttgtgtggtctgtggctattactgctttacttcttttgttatctttgcctgttcttgcgggagctattacaatattgttaactgatcgaaacttaaatacatctttttttgatcctgccggaggtggagatcctattttgtatcaacatcttttt	7045	100	Phyllodoce groenlandica	100	BOLD	Yes	Yes	Phyllodoce groenlandica
376	North	77.444	27.415	50	0	November	23.11.2017	Polychaete juvenile	NA	NA	tctctcttctaatattgcgcatgctggaccgtctgtagacctagctattttttctctacatattgcaggagtctcctctattttaggggctcttaattttattactacagttattaatatacgttataaaggtttacgtcttgaacgtgtcccattatttgtgtgatctgccaaaatcacagctattcttttattactttctttacctgttttagcaggagctattactatactcctcaccgaccgtaatttaaacactgctttttttgatcctgctggaggaggagacccagttttataccagcacttattt	5924	99.95	Harmothoe sp. CMC01	99.7	BOLD	Yes	Yes	Harmothoe sp. CMC01
377	North	77.444	27.415	50	0	November	23.11.2017	Bivalve veliger	241	Anterior-posterior length	attgtcttcatacccattttctggtgcatctatagattttgtaattttctctattcatgttgctggggcttcttctattgctggagctttaaactttttaactacgggtttaaatatgcgaattaaatcaatagagttaaagcgaatacctttatttgtttgatctattattgtaactgcttttctattggtgttagcaatgcctgttttggcgggagctgttactatgcttattagggaccgtcattttaatacaactttttatgatccagcgggagggggggatcctgtattatttgtgcatctattt	4249	99.88	Hiatella sp. K	100	BOLD	Yes	Yes	Hiatella sp. K
378	North	77.444	27.415	50	0	November	23.11.2017	Ophiopluteus	720	Posterodorsal arm	actatctgggccagtcgcccatgcaggaggatgtgttgatttagctatattttctcttcatttagctggtgcatcttcgataatggcctctataaaatttattacaacaataattaatatgcgagcacctggaatgacaatggatcgaactcctttatttgtttgatcaattttaataaccacatttcttcttttattatctcttcctgttttagctggagcaattactatgttattaacagatcgaaaaattaaaacttctttttttgatccaacaggaggaggagatccaatcttattccaacatttattt	2534	97.95	Ophiura robusta	100	BOLD	Yes	Yes	Ophiura robusta
379	North	77.444	27.415	50	0	November	23.11.2017	Gastropod veliger	NA	NA	attgtcttcatacccattttctggtgcatctatagattttgtaattttctctattcatgttgctggggcttcttctattgctggagctttaaactttttaactacgggtttaaatatgcgaattaaatcaatagagttaaagcgaatacctttatttgtttgatctattattgtaactgcttttctattggtgttagcaatgcctgttttggcgggagctgttactatgcttattagggaccgtcattttaatacaactttttatgatccagcgggagggggggatcctgtattatttgtgcatctattt	26	42.31	Hiatella sp. K	100	BOLD	Yes	No	Insufficient reads
380	North	77.444	27.415	50	0	November	23.11.2017	Gastropod veliger	NA	NA	attaagtaatataggtcacataactcaaagagtagatttttgtattttttcattacatttagcaggtttatcatcaattattggggcaatcaacataattacaacaattatagtaagacgttcaaaaataataacactatctcgaataagattatatttatgaagaatattaattactttaattttattattactatccttacctgtacttgcaggtgctatcacaatactattactagatcgtaattttaacactacattttttgatcctgtaggaggaggtgatccaatcttatttcaacatctattt	25	80	Limacina helicina	100	BOLD	No	Yes	Limacina helicina
381	North	77.444	27.415	50	0	November	23.11.2017	Bivalve veliger	262	Anterior-posterior length	attgtcttcatacccattttctggtgcatctatagattttgtaattttctctattcatgttgctggggcttcttctattgctggagctttaaactttttaactacgggtttaaatatgcgaattaaatcaatagagttaaagcgaatacctttatttgtttgatctattattgtaactgcttttctattggtgttagcaatgcctgttttggcgggagctgttactatgcttattagggaccgtcattttaatacaactttttatgatccagcgggagggggggatcctgtattatttgtgcatctattt	680	99.56	Hiatella sp. K	100	BOLD	Yes	Yes	Hiatella sp. K
382	North	77.444	27.415	50	0	November	23.11.2017	Bivalve veliger	218	Anterior-posterior length	attgtcttcatacccattttctggtgcatctatagattttgtaattttctctattcatgttgctggggcttcttctattgctggagctttaaactttttaactacgggtttaaatatgcgaattaaatcaatagagttaaagcgaatacctttatttgtttgatctattattgtaactgcttttctattggtgttagcaatgcctgttttggcgggagctgttactatgcttattagggaccgtcattttaatacaactttttatgatccagcgggagggggggatcctgtattatttgtgcatctattt	1321	99.85	Hiatella sp. K	100	BOLD	Yes	Yes	Hiatella sp. K
383	North	77.444	27.415	50	0	November	23.11.2017	Ophiopluteus	NA	NA	tttatctgggccagtagcacacgcaggtggttgtgtagacttagcaatattttctttacatttagctggtgcttcttctataatggcttcaataaattttattacaacaataataaatatgcgagctcccggtatgacaatggaccgaactcccttatttgtttgatcaatttttattacaacttttttattattattatcactaccagttttagctggggcaattacaatgcttcttactgaccgtaaaattaaaacttctttctttgaccccacaggagggggagaccctatattatttcaacatttattt	2779	99.75	Ophiocten sericeum	100	BOLD	Yes	Yes	Ophiocten sericeum
384	North	77.444	27.415	50	0	November	23.11.2017	Gastropod veliger	NA	NA	attaagtagagttggacacgtaactcatagagtagattttgctatcttttcattacatttagcaggtttatcatctatcattgggagtattaatataattactacagtaatgatcagacgttttgggggaataaatttaatacggataagattatacttatgaagaatactagtaactctaattctattattattatcattgcctgtattagccggagctattaccatattactaatagaccgaaattttaatacaactttctttgatcctgttggagggggcgatccagtcctatttcagcacttattt	763	96.59	Limacina helicina	77.8	BLAST	No	Yes	Limacina helicina 77.8 %
385	North	77.444	27.415	50	0	November	23.11.2017	Gastropod veliger	NA	NA	actatctgggccagtcgcccatgcaggaggatgtgttgatttagctatattttctcttcatttagctggtgcatcttcgataatggcctctataaaatttattacaacaataattaatatgcgagcacctggaatgacaatggatcgaactcctttatttgtttgatcaattttaataaccacatttcttcttttattatctcttcctgttttagctggagcaattactatgttattaacagatcgaaaaattaaaacttctttttttgatccaacaggaggaggagatccaatcttattccaacatttattt	10	40	Ophiura robusta	100	BOLD	Yes	No	Insufficient reads
386	North	77.444	27.415	50	0	November	23.11.2017	Gastropod veliger	NA	NA	attaagtaatataggtcacataactcaaagagtagatttttgtattttttcattacatttagcaggtttatcatcaattattggggcaatcaacataattacaacaattatagtaagacgttcaaaaataataacactatctcgaataagattatatttatgaagaatattaattactttaattttattattactatccttacctgtacttgcaggtgctatcacaatactattactagatcgtaattttaacactacattttttgatcctgtaggaggaggtgatccaatcttatttcaacatctattt	2	100	Limacina helicina	100	BOLD	No	Yes	Insufficient reads
387	North	77.444	27.415	50	0	November	23.11.2017	Asteroidea	NA	NA	actttctaggtctattgctcatgcaggtgggtgtgtagatctcgtaattttttctcttcatttggctggagcttcatctattctagcatctattaattttattgctacaattatcaaaatgcgtgctccaggtatgagaatggattatcttcctctttttatttggtctatacttataactactgttttattattgttgtctttgccggtcttggctggggctatcacaatgttattaactgatcgtaatatcaacacaacattttttgatcccaccggagggggggatcctatcttgttccaacatttgttt	6364	99.95	Ophiacantha bidentata	100	BOLD	Yes	Yes	Ophiacantha bidentata
388	North	77.444	27.415	50	0	November	23.11.2017	Ophiopluteus	996	Posterodorsal arm	actatctgggccagtcgcccatgcaggaggatgtgttgatttagctatattttctcttcatttagctggtgcatcttcgataatggcctctataaaatttattacaacaataattaatatgcgagcacctggaatgacaatggatcgaactcctttatttgtttgatcaattttaataaccacatttcttcttttattatctcttcctgttttagctggagcaattactatgttattaacagatcgaaaaattaaaacttctttttttgatccaacaggaggaggagatccaatcttattccaacatttattt	5168	99.05	Ophiura robusta	100	BOLD	Yes	Yes	Ophiura robusta
389	North	77.444	27.415	50	0	November	23.11.2017	Trochophore?	NA	NA	tctggctaggaatattgcacacgcaggtccatctgtagacttagcaattttttccctacatttagctggagtctcctcaattctaggagcactaaattttattacaactattataaatatacgttctataggcatacaattagaacgggtgcccttatttatctgatctgtaggcattactgtgctactcttactccttgcccttcccgtactagcaggagccatcacaatactactgaccgatcgaaatttaaacaccgcattctttgatcctacgggagggggagaccccatcctatatcagcatctattt	6226	99.76	Glycera capitata	99.3	BOLD	Yes	Yes	Glycera capitata
390	North	77.444	27.415	50	0	November	23.11.2017	Ophiopluteus	706	Posterodorsal arm	actatctgggccagtcgcccatgcaggaggatgtgttgatttagctatattttctcttcatttagctggtgcatcttcgataatggcctctataaaatttattacaacaataattaatatgcgagcacctggaatgacaatggatcgaactcctttatttgtttgatcaattttaataaccacatttcttcttttattatctcttcctgttttagctggagcaattactatgttattaacagatcgaaaaattaaaacttctttttttgatccaacaggaggaggagatccaatcttattccaacatttattt	2956	99.59	Ophiura robusta	100	BOLD	Yes	Yes	Ophiura robusta
391	North	77.444	27.415	50	0	November	23.11.2017	Ball big	NA	NA	tttgtcaggccctaccgcacatgcaggaggctgcgtagacctcgcaattttttctctccacctagcaggtgcatcttcaattatggcctcaataaaatttattacaactattataaatatgcgtaggcccggcatgaccatggatcgacttccgctttttgtttgatctattttcttaacaactatattactactcctttctctgcctgttttagcaggagctattacaatgctactaactgatcgtaacataaaaacaacgttttttgatcctacaggaggaggagacccaatacttttccaacatttattt	6	83.33	Ophiopholis aculeata	100	BOLD	Yes	No	Insufficient reads
392	North	77.444	27.415	50	0	November	23.11.2017	Gastropod veliger	NA	NA	attaagtaatataggtcacataactcaaagagtagatttttgtattttttcattacatttagcaggtttatcatcaattattggggcaatcaacataattacaacaattatagtaagacgttcaaaaataataacactatctcgaataagattatatttatgaagaatattaattactttaattttattattactatccttacctgtacttgcaggtgctatcacaatactattactagatcgtaattttaacactacattttttgatcctgtaggaggaggtgatccaatcttatttcaacatctattt	39	87.18	Limacina helicina	100	BOLD	No	Yes	Limacina helicina
393	North	77.444	27.415	50	0	November	23.11.2017	Bivalve veliger	258	Anterior-posterior length	tctttcaagaaatttaatagggcattctggtgctgcgggagactttttaattttatctcttcatatcggaggtgcttcatctattatagcatccttaaatttttatagaacgtgaggaaatatgcgtgcaggatgtcatcccttccatcgtgtaccccttttttgtagttctattggggtcacaaggtttcttttaattctagctatgcctgtcttagcaggggcattaacaatactgttaacagatcgcaattttaatactgctttttttgatcctaccggtttaggggaccctatattgtttgttcatttattt	64	89.06	Mya truncata	100	BLAST	Yes	Yes	Mya truncata
394	North	77.444	27.415	50	0	November	23.11.2017	Bivalve veliger	223	Anterior-posterior length	attgtcttcatacccattttctggtgcatctatagattttgtaattttctctattcatgttgctggggcttcttctattgctggagctttaaactttttaactacgggtttaaatatgcgaattaaatcaatagagttaaagcgaatacctttatttgtttgatctattattgtaactgcttttctattggtgttagcaatgcctgttttggcgggagctgttactatgcttattagggaccgtcattttaatacaactttttatgatccagcgggagggggggatcctgtattatttgtgcatctattt	1141	99.82	Hiatella sp. K	100	BOLD	Yes	Yes	Hiatella sp. K
395	North	77.444	27.415	50	0	November	23.11.2017	Bivalve veliger	213	Anterior-posterior length	attgtcttcatacccattttctggtgcatctatagattttgtaattttctctattcatgttgctggggcttcttctattgctggagctttaaactttttaactacgggtttaaatatgcgaattaaatcaatagagttaaagcgaatacctttatttgtttgatctattattgtaactgcttttctattggtgttagcaatgcctgttttggcgggagctgttactatgcttattagggaccgtcattttaatacaactttttatgatccagcgggagggggggatcctgtattatttgtgcatctattt	1493	99.8	Hiatella sp. K	100	BOLD	Yes	Yes	Hiatella sp. K
396	North	77.444	27.415	50	0	November	23.11.2017	Bivalve veliger	257	Anterior-posterior length	attgtcttcatacccattttctggtgcatctatagattttgtaattttctctattcatgttgctggggcttcttctattgctggagctttaaactttttaactacgggtttaaatatgcgaattaaatcaatagagttaaagcgaatacctttatttgtttgatctattattgtaactgcttttctattggtgttagcaatgcctgttttggcgggagctgttactatgcttattagggaccgtcattttaatacaactttttatgatccagcgggagggggggatcctgtattatttgtgcatctattt	1059	99.91	Hiatella sp. K	100	BOLD	Yes	Yes	Hiatella sp. K
397	North	77.444	27.415	50	0	November	23.11.2017	Polychaete juvenile	NA	NA	attaagcacttctttcatgagcttatcaccttcaagtacaggaaatcttatctttggtttattaatctctggtatatcctcatgtctcacatctcttaatttctatacaacaattctaaatctgagatcttattatctgaatttaaagactatgccattattcccttgggctctcttcattacaggaggaatgcttttattaacattaccaatcttatcaggagctcttctaatggtcttggctgatcttcattctaatacacttttctttgaaccaatctttggaggagatcctatattctatcaacacttattt	504	33.33	Thoracosphaera heimii	96.8	BLAST	No	No	Insufficient reads
398	North	77.444	27.415	50	0	November	23.11.2017	Bivalve veliger	239	Anterior-posterior length	tctttcaagaaatttaatagggcattctggtgctgcgggagactttttaattttatctcttcatatcggaggtgcttcatctattatagcatccttaaatttttatagaacgtgaggaaatatgcgtgcaggatgtcatcccttccatcgtgtaccccttttttgtagttctattggggtcacaaggtttcttttaattctagctatgcctgtcttagcaggggcattaacaatactgttaacagatcgcaattttaatactgctttttttgatcctaccggtttaggggaccctatattgtttgttcatttattt	460	96.3	Mya truncata	100	BLAST	Yes	Yes	Mya truncata
399	North	77.444	27.415	50	0	November	23.11.2017	Bivalve veliger	264	Anterior-posterior length	tctttcaagaaatttaatagggcattctggtgctgcgggagactttttaattttatctcttcatatcggaggtgcttcatctattatagcatccttaaatttttatagaacgtgaggaaatatgcgtgcaggatgtcatcccttccatcgtgtaccccttttttgtagttctattggggtcacaaggtttcttttaattctagctatgcctgtcttagcaggggcattaacaatactgttaacagatcgcaattttaatactgctttttttgatcctaccggtttaggggaccctatattgtttgttcatttattt	425	99.29	Mya truncata	100	BLAST	Yes	Yes	Mya truncata
400	North	77.444	27.415	50	0	November	23.11.2017	Bivalve veliger	241	Anterior-posterior length	attgtcttcatacccattttctggtgcatctatagattttgtaattttctctattcatgttgctggggcttcttctattgctggagctttaaactttttaactacgggtttaaatatgcgaattaaatcaatagagttaaagcgaatacctttatttgtttgatctattattgtaactgcttttctattggtgttagcaatgcctgttttggcgggagctgttactatgcttattagggaccgtcattttaatacaactttttatgatccagcgggagggggggatcctgtattatttgtgcatctattt	559	99.82	Hiatella sp. K	100	BOLD	Yes	Yes	Hiatella sp. K
401	North	77.444	27.415	50	0	November	23.11.2017	Gastropod veliger	NA	NA	No sequence	0	0	No sequence	0	No sequence	No sequence	No	Insufficient reads
402	North	77.444	27.415	50	0	November	23.11.2017	Gastropod veliger	NA	NA	ttaagtggaaatatggcccactccggaccatctgttgattttgctattttttctctccatttagctggtgtgtcatctttactaggggcagttaattttattagaacatttggcaatttacgtgggctaggaatacaattagaccaaactcctctttttgcatggtctgtattgattactactattttattattactatccttgccagttttagctggggctattactatattattaacagaccgaaacttaaatacgtccttttacgacacaggtggaggaggcgaccctattctttaccaacatttattt	6	33.33	Triconia borealis	99.3	BOLD	No	No	Insufficient reads
403	North	77.444	27.415	50	0	November	23.11.2017	Ophiopluteus	554	Posterodorsal arm	attatccggaccagttgctcacgccggtggctgtgttgatttagctatattttccctccacttagctggtgcttcgtcaataatggcatcaattaactttattactacaattattaatatgcgagcgccaggtatgacaatggatcgaacccctttatttgtttgatcgattctaattacaacatttcttttattactctcattacctgttctagccggagccattaccatgttattaacagaccggaaaattaaaacatctttcttcgacccaacgggaggaggggaccctattttgttccaacacctattt	1292	99.85	Ophiura sarsii	100	BOLD	Yes	Yes	Ophiura sarsii
404	North	77.444	27.415	50	0	November	23.11.2017	Ophiopluteus	702	Posterodorsal arm	actatctgggccagtcgcccatgcaggaggatgtgttgatttagctatattttctcttcatttagctggtgcatcttcgataatggcctctataaaatttattacaacaataattaatatgcgagcacctggaatgacaatggatcgaactcctttatttgtttgatcaattttaataaccacatttcttcttttattatctcttcctgttttagctggagcaattactatgttattaacagatcgaaaaattaaaacttctttttttgatccaacaggaggaggagatccaatcttattccaacatttattt	880	97.5	Ophiura robusta	100	BOLD	Yes	Yes	Ophiura robusta
405	North	77.444	27.415	50	0	November	23.11.2017	Gastropod veliger	NA	NA	ttatcaggtccggtagctcacgcaggtggttgtgtagatttagcaatattttctttacatttagctggtgcttcttctataatggcctcaataaattttataactacaataattaatatgcgagctcccggtatgacaatggaccgagtccctttatttgtttgatcaatttttattacaacttttttattattattatctttaccagttttagctggtgcaattacaatgttattaactgaccgtaatataaaaacttccttttttgatccaacaggaggaggagacccaatattattccaacacttgttc	1	100	Ophiocten gracilis	100	BOLD	Yes	No	Insufficient reads
406	North	77.444	27.415	50	0	November	23.11.2017	Bivalve veliger	268	Anterior-posterior length	attgtcttcatacccattttctggtgcatctatagattttgtaattttctctattcatgttgctggggcttcttctattgctggagctttaaactttttaactacgggtttaaatatgcgaattaaatcaatagagttaaagcgaatacctttatttgtttgatctattattgtaactgcttttctattggtgttagcaatgcctgttttggcgggagctgttactatgcttattagggaccgtcattttaatacaactttttatgatccagcgggagggggggatcctgtattatttgtgcatctattt	2635	99.66	Hiatella sp. K	100	BOLD	Yes	Yes	Hiatella sp. K
407	North	77.444	27.415	50	0	November	23.11.2017	Bivalve veliger	328	Anterior-posterior length	tctcacgtctattgaatttttaagggatccttctatagatatagcgattttttctttgcatttgggaggtgtgtcttcaatcgcagcaaggttaaattttgcaaggacgtgtgttaatatgcgacaggaggggcgtggcttgcataagatccctatgttccctatctctctggggattactgccttattattaatcattgctataccagttttggcaggggctctaaccatgttgctacttgatcgaaattttgctactaggttttttgaccctgtgggggggggtgatcctattttgtttatacatctattt	1069	98.78	Serripes groenlandicus	94.1	BOLD	Yes	Yes	Serripes groenlandicus 94.1 %
408	North	77.444	27.415	50	0	November	23.11.2017	Bivalve veliger	166	Anterior-posterior length	tctttcaagaaatttaatagggcattctggtgctgcgggagactttttaattttatctcttcatatcggaggtgcttcatctattatagcatccttaaatttttatagaacgtgaggaaatatgcgtgcaggatgtcatcccttccatcgtgtaccccttttttgtagttctattggggtcacaaggtttcttttaattctagctatgcctgtcttagcaggggcattaacaatactgttaacagatcgcaattttaatactgctttttttgatcctaccggtttaggggaccctatattgtttgttcatttattt	251	93.63	Mya truncata	100	BLAST	Yes	Yes	Mya truncata
409	North	77.444	27.415	50	0	November	23.11.2017	Ophiopluteus	961	Posterodorsal arm	actatctgggccagtcgcccatgcaggaggatgtgttgatttagctatattttctcttcatttagctggtgcatcttcgataatggcctctataaaatttattacaacaataattaatatgcgagcacctggaatgacaatggatcgaactcctttatttgtttgatcaattttaataaccacatttcttcttttattatctcttcctgttttagctggagcaattactatgttattaacagatcgaaaaattaaaacttctttttttgatccaacaggaggaggagatccaatcttattccaacatttattt	6533	76.38	Ophiura robusta	100	BOLD	Yes	Yes	Ophiura robusta
410	North	77.444	27.415	50	0	November	23.11.2017	Juvenile ophiuroid	NA	NA	tttatctgggccagtagcacacgcaggtggttgtgtagacttagcaatattttctttacatttagctggtgcttcttctataatggcttcaataaattttattacaacaataataaatatgcgagctcccggtatgacaatggaccgaactcccttatttgtttgatcaatttttattacaacttttttattattattatcactaccagttttagctggggcaattacaatgcttcttactgaccgtaaaattaaaacttctttctttgaccccacaggagggggagaccctatattatttcaacatttattt	4895	96.57	Ophiocten sericeum	100	BOLD	Yes	Yes	Ophiocten sericeum
411	North	77.444	27.415	50	0	November	23.11.2017	Nudibranch	NA	NA	tctatcaggggctattgggcatggtggatgttctgtggatttggctattttttctttgcatttagcagggatgtcttctcttcttggtgcaatcaattttattactactatttttaatatgcggtctccagcgatgactttagatcggttaagattatttgtgtgatctgttcttgttactgcttttttattattactttctttacctgttttagctggggcaattactatgctgcttacagaccggaattttaatactaggttctttgacccagccggtgggggagacccaattttgtaccagcatttattt	7193	99.82	Dendronotus dalli	99.7	BOLD	Yes	Yes	Dendronotus dalli
412	North	77.444	27.415	50	0	November	23.11.2017	Bivalve veliger	223	Anterior-posterior length	tctttcaagaaatttaatagggcattctggtgctgcgggagactttttaattttatctcttcatatcggaggtgcttcatctattatagcatccttaaatttttatagaacgtgaggaaatatgcgtgcaggatgtcatcccttccatcgtgtaccccttttttgtagttctattggggtcacaaggtttcttttaattctagctatgcctgtcttagcaggggcattaacaatactgttaacagatcgcaattttaatactgctttttttgatcctaccggtttaggggaccctatattgtttgttcatttattt	743	96.37	Mya truncata	100	BLAST	Yes	Yes	Mya truncata
413	North	77.444	27.415	50	0	November	23.11.2017	Nemertea	NA	NA	tctcgcctctaatattgcccatgctggtccttccgtagatctagctattttttcacttcatattgcgggagtctcttctattttaggagctcttaattttattactactgttgttaatatgcgatataaagggttacgacttgagcgtgttcctttatttgtatgagcagctaaaattacggcaattcttttattactctccttaccagttctagcaggagctattactatacttttaactgaccgtaacctaaatactgccttctttgatccagcaggaggaggagaccctgtattataccaacacctattt	6656	93.99	Gattyana cirrhosa	100	BOLD	Yes	Yes	Gattyana cirrhosa
414	North	77.444	27.415	50	0	November	23.11.2017	Bivalve veliger	324	Anterior-posterior length	tctcacgtctattgaatttttaagggatccttctatagatatagcgattttttctttgcatttgggaggtgtgtcttcaatcgcagcaaggttaaattttgcaaggacgtgtgttaatatgcgacaggaggggcgtggcttgcataagatccctatgttccctatctctctggggattactgccttattattaatcattgctataccagttttggcaggggctctaaccatgttgctacttgatcgaaattttgctactaggttttttgaccctgtgggggggggtgatcctattttgtttatacatctattt	1720	99.48	Serripes groenlandicus	94.1	BOLD	Yes	Yes	Serripes groenlandicus 94.1 %
415	North	77.444	27.415	50	0	November	23.11.2017	Bivalve veliger	227	Anterior-posterior length	attgtcttcatacccattttctggtgcatctatagattttgtaattttctctattcatgttgctggggcttcttctattgctggagctttaaactttttaactacgggtttaaatatgcgaattaaatcaatagagttaaagcgaatacctttatttgtttgatctattattgtaactgcttttctattggtgttagcaatgcctgttttggcgggagctgttactatgcttattagggaccgtcattttaatacaactttttatgatccagcgggagggggggatcctgtattatttgtgcatctattt	2591	99.96	Hiatella sp. K	100	BOLD	Yes	Yes	Hiatella sp. K
416	North	77.444	27.415	50	0	November	23.11.2017	Bivalve veliger	133	Anterior-posterior length	attgtcttcatacccattttctggtgcatctatagattttgtaattttctctattcatgttgctggggcttcttctattgctggagctttaaactttttaactacgggtttaaatatgcgaattaaatcaatagagttaaagcgaatacctttatttgtttgatctattattgtaactgcttttctattggtgttagcaatgcctgttttggcgggagctgttactatgcttattagggaccgtcattttaatacaactttttatgatccagcgggagggggggatcctgtattatttgtgcatctattt	2338	99.83	Hiatella sp. K	100	BOLD	Yes	Yes	Hiatella sp. K
417	North	77.444	27.415	100	50	November	23.11.2017	Ball large	NA	NA	cttagcaagaaatattgcccacgcgggcccctctgtagatatggctattttctcccttcaccttgcggggatttcctctatccttggggccattaattttattactacagttattaacatacgatgaagaggattacgactagaacgaatccccctattcgtgtgaggagtagttattactactattctcctacttctatcgctcccggttcttgcgggggccatcactatattacttacagatcgcaacttaaatactgcattctttgaccctgcaggggggggcgatccaattttataccaacatctcttc	12	58.33	Nothria conchylega CMC02	99	BOLD	Yes	Yes	Insufficient reads
418	North	77.444	27.415	100	50	November	23.11.2017	Gastropod veliger	NA	NA	tctttcaggtgcaattgggcacggggggtgttcggtagacttggcaattttttctttacatttagcagggatgtcttctttgttgggtgctattaattttattactaccatttttaacatacgctctccggaaataacaatagatcggttaagtttatttgtttgatcagttctggttactgcttttcttttattactctctcttcctgtattagctggggctattactatgcttttaactgatcgtaattttaatactaggtttttcgatcctgccggagggggggatcctatcttataccagcatttattt	4385	99.75	Chlamylla borealis	99.3	BOLD	Yes	Yes	Chlamylla borealis
419	North	77.444	27.415	100	50	November	23.11.2017	Small Limacina?	NA	NA	attaagtaatataggtcacataactcaaagagtagatttttgtattttttcattacatttagcaggtttatcatcaattattggggcaatcaacataattacaacaattatagtaagacgttcaaaaataataacactatctcgaataagattatatttatgaagaatattaattactttaattttattattactatccttacctgtacttgcaggtgctatcacaatactattactagatcgtaattttaacactacattttttgatcctgtaggaggaggtgatccaatcttatttcaacatctattt	40	85	Limacina helicina	100	BOLD	No	Yes	Limacina helicina
420	North	77.444	27.415	100	50	November	23.11.2017	Ball large	NA	NA	cttagcaagaaatattgcccacgcgggcccctctgtagatatggctattttctcccttcaccttgcggggatttcctctatccttggggccattaattttattactacagttattaacatacgatgaagaggattacgactagaacgaatccccctattcgtgtgaggagtagttattactactattctcctacttctatcgctcccggttcttgcgggggccatcactatattacttacagatcgcaacttaaatactgcattctttgaccctgcaggggggggcgatccaattttataccaacatctcttc	8076	99.9	Nothria conchylega CMC02	99	BOLD	Yes	Yes	Nothria conchylega CMC02
421	North	77.444	27.415	100	50	November	23.11.2017	Ball large	NA	NA	cttagcaagaaatattgcccacgcgggcccctctgtagatatggctattttctcccttcaccttgcggggatttcctctatccttggggccattaattttattactacagttattaacatacgatgaagaggattacgactagaacgaatccccctattcgtgtgaggagtagttattactactattctcctacttctatcgctcccggttcttgcgggggccatcactatattacttacagatcgcaacttaaatactgcattctttgaccctgcaggggggggcgatccaattttataccaacatctcttc	6	66.67	Nothria conchylega CMC02	99	BOLD	Yes	Yes	Insufficient reads
422	North	77.444	27.415	100	50	November	23.11.2017	Ball large	NA	NA	attgtcttcatacccattttctggtgcatctatagattttgtaattttctctattcatgttgctggggcttcttctattgctggagctttaaactttttaactacgggtttaaatatgcgaattaaatcaatagagttaaagcgaatacctttatttgtttgatctattattgtaactgcttttctattggtgttagcaatgcctgttttggcgggagctgttactatgcttattagggaccgtcattttaatacaactttttatgatccagcgggagggggggatcctgtattatttgtgcatctattt	1	100	Hiatella sp. K	100	BOLD	Yes	No	Insufficient reads
423	North	77.444	27.415	100	50	November	23.11.2017	Nemertea	NA	NA	tttgtctagaaatgtggctcattcagggccttctgtagatttggctattttttctttacatttagcaggggtatcttctattcttgcgtcaattaactttattactaccgcaatgaatatgcgttctagaggtcttcggttagagcgtgtgccgttgtttgtgtggtctgtggctattactgctttacttcttttgttatctttgcctgttcttgcgggagctattacaatattgttaactgatcgaaacttaaatacatctttttttgatcctgccggaggtggagatcctattttgtatcaacatcttttt	6664	99.94	Phyllodoce groenlandica	100	BOLD	Yes	Yes	Phyllodoce groenlandica
424	North	77.444	27.415	100	50	November	23.11.2017	Ophiopluteus	471	Posterodorsal arm	tttgtcaggccctaccgcacatgcaggaggctgcgtagacctcgcaattttttctctccacctagcaggtgcatcttcaattatggcctcaataaaatttattacaactattataaatatgcgtaggcccggcatgaccatggatcgacttccgctttttgtttgatctattttcttaacaactatattactactcctttctctgcctgttttagcaggagctattacaatgctactaactgatcgtaacataaaaacaacgttttttgatcctacaggaggaggagacccaatacttttccaacatttattt	4784	100	Ophiopholis aculeata	100	BOLD	Yes	Yes	Ophiopholis aculeata
425	North	77.444	27.415	100	50	November	23.11.2017	Ball large	NA	NA	tttatctagaaatttagctcattctggtccttcagttgatatagctattttttcattacatatagcaggtgtttcttctattttgggagcaattaattttattgtaactattatatttaatcgtgtaattggtataagatttaaacgtattcctttatttgtttggtctgtattaattactgctattttattattattagcattacctgttttagcgggtgtaattactatattgttaactgatcgtaatttaaatactagattttttgatccagcaggaggaggagatcctattttatttcaacatttattt	14	50	Sphaerodorum flavum	100	BOLD	Yes	Yes	Insufficient reads
426	North	77.444	27.415	100	50	November	23.11.2017	Small Limacina?	NA	NA	tttgtcaggccctaccgcacatgcaggaggctgcgtagacctcgcaattttttctctccacctagcaggtgcatcttcaattatggcctcaataaaatttattacaactattataaatatgcgtaggcccggcatgaccatggatcgacttccgctttttgtttgatctattttcttaacaactatattactactcctttctctgcctgttttagcaggagctattacaatgctactaactgatcgtaacataaaaacaacgttttttgatcctacaggaggaggagacccaatacttttccaacatttattt	7	42.86	Ophiopholis aculeata	100	BOLD	Yes	No	Insufficient reads
427	North	77.444	27.415	100	50	November	23.11.2017	Nemertea	NA	NA	tttgtctagaaatgtggctcattcagggccttctgtagatttggctattttttctttacatttagcaggggtatcttctattcttgcgtcaattaactttattactaccgcaatgaatatgcgttctagaggtcttcggttagagcgtgtgccgttgtttgtgtggtctgtggctattactgctttacttcttttgttatctttgcctgttcttgcgggagctattacaatattgttaactgatcgaaacttaaatacatctttttttgatcctgccggaggtggagatcctattttgtatcaacatcttttt	10005	99.89	Phyllodoce groenlandica	100	BOLD	Yes	Yes	Phyllodoce groenlandica
428	North	77.444	27.415	100	50	November	23.11.2017	Small Limacina?	NA	NA	attaagtaatataggtcacataactcaaagagtagatttttgtattttttcattacatttagcaggtttatcatcaattattggggcaatcaacataattacaacaattatagtaagacgttcaaaaataataacactatctcgaataagattatatttatgaagaatattaattactttaattttattattactatccttacctgtacttgcaggtgctatcacaatactattactagatcgtaattttaacactacattttttgatcctgtaggaggaggtgatccaatcttatttcaacatctattt	4	100	Limacina helicina	100	BOLD	No	Yes	Insufficient reads
429	North	77.444	27.415	100	50	November	23.11.2017	Ball large	NA	NA	tctttcaggtgcaattgggcacggggggtgttcggtagacttggcaattttttctttacatttagcagggatgtcttctttgttgggtgctattaattttattactaccatttttaacatacgctctccggaaataacaatagatcggttaagtttatttgtttgatcagttctggttactgcttttcttttattactctctcttcctgtattagctggggctattactatgcttttaactgatcgtaattttaatactaggtttttcgatcctgccggagggggggatcctatcttataccagcatttattt	6	66.67	Chlamylla borealis	99.3	BOLD	Yes	No	Insufficient reads
430	North	77.444	27.415	100	50	November	23.11.2017	Nemertea	NA	NA	tttgtctagaaatgtggctcattcagggccttctgtagatttggctattttttctttacatttagcaggggtatcttctattcttgcgtcaattaactttattactaccgcaatgaatatgcgttctagaggtcttcggttagagcgtgtgccgttgtttgtgtggtctgtggctattactgctttacttcttttgttatctttgcctgttcttgcgggagctattacaatattgttaactgatcgaaacttaaatacatctttttttgatcctgccggaggtggagatcctattttgtatcaacatcttttt	9556	99.99	Phyllodoce groenlandica	100	BOLD	Yes	Yes	Phyllodoce groenlandica
431	North	77.444	27.415	100	50	November	23.11.2017	Ball small	NA	NA	gttgagcactgtgggccatagagggggcgctgtggatttgggtatcttctccttacaccttgctggcgttagaagaatcttggggagagctaattttattaccaccatctctaatataaaaggtgaaggcatatctatagaacttatgcctttattcgtgtgggcggtgctcctcacagctatcttacttttgctctctcttcctgtattagctggtgctattactatgttactaacagaccgtaattttaacacctctttctttgaccctgctggtggcggggacccgattttataccaacacctattt	9	44.44	Sagitta elegans	94.2	BLAST	No	Yes	Insufficient reads
432	North	77.444	27.415	100	50	November	23.11.2017	Small Limacina?	NA	NA	attaagtaatataggtcacataactcaaagagtagatttttgtattttttcattacatttagcaggtttatcatcaattattggggcaatcaacataattacaacaattatagtaagacgttcaaaaataataacactatctcgaataagattatatttatgaagaatattaattactttaattttattattactatccttacctgtacttgcaggtgctatcacaatactattactagatcgtaattttaacactacattttttgatcctgtaggaggaggtgatccaatcttatttcaacatctattt	31	90.32	Limacina helicina	100	BOLD	No	Yes	Limacina helicina
433	North	77.444	27.415	100	50	November	23.11.2017	Ball large	NA	NA	tctttctagaaatattgcacatgctggtggttctgtagatttggctattttttctctacatcttgctggtatttcttctattttgggtgccattaattttattactactattatcaatatgcgctggtacggaatgcagtttgagcgcctatctctttttgtttgatcggtaaagattactgcagtgctattgttattatcccttcctgtattggctggggcgattactatgcttttaactgatcgtaattttaatacttctttttttgaccctgctggtggtggtgacccaattctttatcagcatttgttt	2	100	Monostilifera	91.6	BOLD	Yes	Yes	Insufficient reads
434	North	77.444	27.415	100	50	November	23.11.2017	Small Limacina?	NA	NA	attaagtaatataggtcacataactcaaagagtagatttttgtattttttcattacatttagcaggtttatcatcaattattggggcaatcaacataattacaacaattatagtaagacgttcaaaaataataacactatctcgaataagattatatttatgaagaatattaattactttaattttattattactatccttacctgtacttgcaggtgctatcacaatactattactagatcgtaattttaacactacattttttgatcctgtaggaggaggtgatccaatcttatttcaacatctattt	41	70.73	Limacina helicina	100	BOLD	No	Yes	Insufficient reads
435	North	77.444	27.415	100	50	November	23.11.2017	Polychaete juvenile	NA	NA	tttgtctagaaatgtggctcattcagggccttctgtagatttggctattttttctttacatttagcaggggtatcttctattcttgcgtcaattaactttattactaccgcaatgaatatgcgttctagaggtcttcggttagagcgtgtgccgttgtttgtgtggtctgtggctattactgctttacttcttttgttatctttgcctgttcttgcgggagctattacaatattgttaactgatcgaaacttaaatacatctttttttgatcctgccggaggtggagatcctattttgtatcaacatcttttt	9606	100	Phyllodoce groenlandica	100	BOLD	Yes	Yes	Phyllodoce groenlandica
436	North	77.444	27.415	100	50	November	23.11.2017	Small Limacina?	NA	NA	gttgagcactgtgggccatagagggggcgctgtggatttgggtatcttctccttacaccttgctggcgttagaagaatcttggggagagctaattttattaccaccatctctaatataaaaggtgaaggcatatctatagaacttatgcctttattcgtgtgggcggtgctcctcacagctatcttacttttgctctctcttcctgtattagctggtgctattactatgttactaacagaccgtaattttaacacctctttctttgaccctgctggtggcggggacccgattttataccaacacctattt	23	56.52	Sagitta elegans	94.2	BLAST	No	No	Insufficient reads
437	North	77.444	27.415	100	50	November	23.11.2017	Small Limacina?	NA	NA	ttagcagggaactactcccaccctggagcctccgtagacctaaccatcttctccttacacctagcaggtgtctcctctatcttaggggccatcaatttcatcacaacaattatcaatataaaaccccctgccataacccaataccaaacgcccctcttcgtctgatccgtcctaatcacagcagtcctacttctcctatctctcccagtcctagctgctggcatcactatactactaacagaccgcaacctcaacaccaccttcttcgaccccgccggaggaggagaccccattctataccaacacctattc	2	50	Homo sapiens	100	BOLD	No	No	Insufficient reads
438	North	77.444	27.415	100	50	November	23.11.2017	Nemertea	NA	NA	tttgtctagaaatgtggctcattcagggccttctgtagatttggctattttttctttacatttagcaggggtatcttctattcttgcgtcaattaactttattactaccgcaatgaatatgcgttctagaggtcttcggttagagcgtgtgccgttgtttgtgtggtctgtggctattactgctttacttcttttgttatctttgcctgttcttgcgggagctattacaatattgttaactgatcgaaacttaaatacatctttttttgatcctgccggaggtggagatcctattttgtatcaacatcttttt	9888	99.92	Phyllodoce groenlandica	100	BOLD	Yes	Yes	Phyllodoce groenlandica
439	North	77.444	27.415	100	50	November	23.11.2017	Ball small	NA	NA	tttgtctagaaatgtggctcattcagggccttctgtagatttggctattttttctttacatttagcaggggtatcttctattcttgcgtcaattaactttattactaccgcaatgaatatgcgttctagaggtcttcggttagagcgtgtgccgttgtttgtgtggtctgtggctattactgctttacttcttttgttatctttgcctgttcttgcgggagctattacaatattgttaactgatcgaaacttaaatacatctttttttgatcctgccggaggtggagatcctattttgtatcaacatcttttt	12	91.67	Phyllodoce groenlandica	100	BOLD	Yes	Yes	Phyllodoce groenlandica
440	North	77.444	27.415	100	50	November	23.11.2017	Small Limacina?	NA	NA	attaagtaatataggtcacataactcaaagagtagatttttgtattttttcattacatttagcaggtttatcatcaattattggggcaatcaacataattacaacaattatagtaagacgttcaaaaataataacactatctcgaataagattatatttatgaagaatattaattactttaattttattattactatccttacctgtacttgcaggtgctatcacaatactattactagatcgtaattttaacactacattttttgatcctgtaggaggaggtgatccaatcttatttcaacatctattt	90	93.33	Limacina helicina	100	BOLD	No	Yes	Limacina helicina
441	North	77.444	27.415	100	50	November	23.11.2017	Small Limacina?	NA	NA	attaagtaatataggtcacataactcaaagagtagatttttgtattttttcattacatttagcaggtttatcatcaattattggggcaatcaacataattacaacaattatagtaagacgttcaaaaataataacactatctcgaataagattatatttatgaagaatattaattactttaattttattattactatccttacctgtacttgcaggtgctatcacaatactattactagatcgtaattttaacactacattttttgatcctgtaggaggaggtgatccaatcttatttcaacatctattt	11	72.73	Limacina helicina	100	BOLD	No	Yes	Insufficient reads
442	North	77.444	27.415	100	50	November	23.11.2017	Ball large	NA	NA	cttagcaagaaatattgcccacgcgggcccctctgtagatatggctattttctcccttcaccttgcggggatttcctctatccttggggccattaattttattactacagttattaacatacgatgaagaggattacgactagaacgaatccccctattcgtgtgaggagtagttattactactattctcctacttctatcgctcccggttcttgcgggggccatcactatattacttacagatcgcaacttaaatactgcattctttgaccctgcaggggggggcgatccaattttataccaacatctcttc	33	69.7	Nothria conchylega CMC02	99	BOLD	Yes	Yes	Insufficient reads
443	North	77.444	27.415	100	50	November	23.11.2017	Small Limacina?	NA	NA	attgtcttcatacccattttctggtgcatctatagattttgtaattttctctattcatgttgctggggcttcttctattgctggagctttaaactttttaactacgggtttaaatatgcgaattaaatcaatagagttaaagcgaatacctttatttgtttgatctattattgtaactgcttttctattggtgttagcaatgcctgttttggcgggagctgttactatgcttattagggaccgtcattttaatacaactttttatgatccagcgggagggggggatcctgtattatttgtgcatctattt	11	45.45	Hiatella sp. K	100	BOLD	Yes	No	Insufficient reads
444	North	77.444	27.415	100	50	November	23.11.2017	Ophiopluteus	707	Posterodorsal arm	actatctgggccagtcgcccatgcaggaggatgtgttgatttagctatattttctcttcatttagctggtgcatcttcgataatggcctctataaaatttattacaacaataattaatatgcgagcacctggaatgacaatggatcgaactcctttatttgtttgatcaattttaataaccacatttcttcttttattatctcttcctgttttagctggagcaattactatgttattaacagatcgaaaaattaaaacttctttttttgatccaacaggaggaggagatccaatcttattccaacatttattt	5775	99.41	Ophiura robusta	100	BOLD	Yes	Yes	Ophiura robusta
445	North	77.444	27.415	100	50	November	23.11.2017	Ball large	NA	NA	cttagcaagaaatattgcccacgcgggcccctctgtagatatggctattttctcccttcaccttgcggggatttcctctatccttggggccattaattttattactacagttattaacatacgatgaagaggattacgactagaacgaatccccctattcgtgtgaggagtagttattactactattctcctacttctatcgctcccggttcttgcgggggccatcactatattacttacagatcgcaacttaaatactgcattctttgaccctgcaggggggggcgatccaattttataccaacatctcttc	190	90	Nothria conchylega CMC02	99	BOLD	Yes	Yes	Nothria conchylega CMC02
446	North	77.444	27.415	100	50	November	23.11.2017	Bivalve veliger small	141	Anterior-posterior length	attgtcttcatacccattttctggtgcatctatagattttgtaattttctctattcatgttgctggggcttcttctattgctggagctttaaactttttaactacgggtttaaatatgcgaattaaatcaatagagttaaagcgaatacctttatttgtttgatctattattgtaactgcttttctattggtgttagcaatgcctgttttggcgggagctgttactatgcttattagggaccgtcattttaatacaactttttatgatccagcgggagggggggatcctgtattatttgtgcatctattt	5	40	Hiatella sp. K	100	BOLD	Yes	Yes	Insufficient reads
447	North	77.444	27.415	100	50	November	23.11.2017	Limacina?	NA	NA	attaagtaatataggtcacataactcaaagagtagatttttgtattttttcattacatttagcaggtttatcatcaattattggggcaatcaacataattacaacaattatagtaagacgttcaaaaataataacactatctcgaataagattatatttatgaagaatattaattactttaattttattattactatccttacctgtacttgcaggtgctatcacaatactattactagatcgtaattttaacactacattttttgatcctgtaggaggaggtgatccaatcttatttcaacatctattt	817	96.08	Limacina helicina	100	BOLD	No	Yes	Limacina helicina
448	North	77.444	27.415	100	50	November	23.11.2017	Small Limacina?	NA	NA	attaagtaatataggtcacataactcaaagagtagatttttgtattttttcattacatttagcaggtttatcatcaattattggggcaatcaacataattacaacaattatagtaagacgttcaaaaataataacactatctcgaataagattatatttatgaagaatattaattactttaattttattattactatccttacctgtacttgcaggtgctatcacaatactattactagatcgtaattttaacactacattttttgatcctgtaggaggaggtgatccaatcttatttcaacatctattt	15	46.67	Limacina helicina	100	BOLD	No	Yes	Insufficient reads
449	North	77.444	27.415	100	50	November	23.11.2017	Small Limacina?	NA	NA	attaagtaatataggtcacataactcaaagagtagatttttgtattttttcattacatttagcaggtttatcatcaattattggggcaatcaacataattacaacaattatagtaagacgttcaaaaataataacactatctcgaataagattatatttatgaagaatattaattactttaattttattattactatccttacctgtacttgcaggtgctatcacaatactattactagatcgtaattttaacactacattttttgatcctgtaggaggaggtgatccaatcttatttcaacatctattt	8	62.5	Limacina helicina	100	BOLD	No	Yes	Insufficient reads
450	North	77.444	27.415	100	50	November	23.11.2017	Small Limacina?	NA	NA	attaagtaatataggtcacataactcaaagagtagatttttgtattttttcattacatttagcaggtttatcatcaattattggggcaatcaacataattacaacaattatagtaagacgttcaaaaataataacactatctcgaataagattatatttatgaagaatattaattactttaattttattattactatccttacctgtacttgcaggtgctatcacaatactattactagatcgtaattttaacactacattttttgatcctgtaggaggaggtgatccaatcttatttcaacatctattt	33	96.97	Limacina helicina	100	BOLD	No	Yes	Limacina helicina
451	North	77.444	27.415	100	50	November	23.11.2017	Nemertea	NA	NA	tttgtctagaaatgtggctcattcagggccttctgtagatttggctattttttctttacatttagcaggggtatcttctattcttgcgtcaattaactttattactaccgcaatgaatatgcgttctagaggtcttcggttagagcgtgtgccgttgtttgtgtggtctgtggctattactgctttacttcttttgttatctttgcctgttcttgcgggagctattacaatattgttaactgatcgaaacttaaatacatctttttttgatcctgccggaggtggagatcctattttgtatcaacatcttttt	8568	99.96	Phyllodoce groenlandica	100	BOLD	Yes	Yes	Phyllodoce groenlandica
452	North	77.444	27.415	100	50	November	23.11.2017	Ball large	NA	NA	ttagcaagaaatatttctcatagaggaaggtcagttgacttagcaattttttcccttcatttagctggtgcatcttcaattcttggggctattaactttataacaactattatcaatatgcgaaggtcttccatatctttcgctcggctacctctgttcatttgatccgtatttatcactgcgattttgctagtcctctctctgccagtattagccggtgctatcacaatacttctaacagatcggaatttaaacaccacattttttgaccctgccggagggggggaccctattttataccaacatttattt	7	57.14	Alcyonidium	82.8	BOLD	Yes	No	Insufficient reads
453	North	77.444	27.415	100	50	November	23.11.2017	Small Limacina?	NA	NA	attaagtaatataggtcacataactcaaagagtagatttttgtattttttcattacatttagcaggtttatcatcaattattggggcaatcaacataattacaacaattatagtaagacgttcaaaaataataacactatctcgaataagattatatttatgaagaatattaattactttaattttattattactatccttacctgtacttgcaggtgctatcacaatactattactagatcgtaattttaacactacattttttgatcctgtaggaggaggtgatccaatcttatttcaacatctattt	33	84.85	Limacina helicina	100	BOLD	No	Yes	Limacina helicina
454	North	77.444	27.415	100	50	November	23.11.2017	Small Limacina?	NA	NA	attaagtaatataggtcacataactcaaagagtagatttttgtattttttcattacatttagcaggtttatcatcaattattggggcaatcaacataattacaacaattatagtaagacgttcaaaaataataacactatctcgaataagattatatttatgaagaatattaattactttaattttattattactatccttacctgtacttgcaggtgctatcacaatactattactagatcgtaattttaacactacattttttgatcctgtaggaggaggtgatccaatcttatttcaacatctattt	36	52.78	Limacina helicina	100	BOLD	No	Yes	Insufficient reads
455	North	77.444	27.415	100	50	November	23.11.2017	Bivalve veliger large yellow	287	Anterior-posterior length	attgtcttcatacccattttctggtgcatctatagattttgtaattttctctattcatgttgctggggcttcttctattgctggagctttaaactttttaactacgggtttaaatatgcgaattaaatcaatagagttaaagcgaatacctttatttgtttgatctattattgtaactgcttttctattggtgttagcaatgcctgttttggcgggagctgttactatgcttattagggaccgtcattttaatacaactttttatgatccagcgggagggggggatcctgtattatttgtgcatctattt	4083	99.85	Hiatella sp. K	100	BOLD	Yes	Yes	Hiatella sp. K
456	North	77.444	27.415	100	50	November	23.11.2017	Nemertea	NA	NA	tttgtctagaaatgtggctcattcagggccttctgtagatttggctattttttctttacatttagcaggggtatcttctattcttgcgtcaattaactttattactaccgcaatgaatatgcgttctagaggtcttcggttagagcgtgtgccgttgtttgtgtggtctgtggctattactgctttacttcttttgttatctttgcctgttcttgcgggagctattacaatattgttaactgatcgaaacttaaatacatctttttttgatcctgccggaggtggagatcctattttgtatcaacatcttttt	8058	99.94	Phyllodoce groenlandica	100	BOLD	Yes	Yes	Phyllodoce groenlandica
457	North	77.444	27.415	100	50	November	23.11.2017	Nemertea	NA	NA	tttgtctagaaatgtggctcattcagggccttctgtagatttggctattttttctttacatttagcaggggtatcttctattcttgcgtcaattaactttattactaccgcaatgaatatgcgttctagaggtcttcggttagagcgtgtgccgttgtttgtgtggtctgtggctattactgctttacttcttttgttatctttgcctgttcttgcgggagctattacaatattgttaactgatcgaaacttaaatacatctttttttgatcctgccggaggtggagatcctattttgtatcaacatcttttt	8564	99.89	Phyllodoce groenlandica	100	BOLD	Yes	Yes	Phyllodoce groenlandica
458	North	77.444	27.415	100	50	November	23.11.2017	Small Limacina?	NA	NA	tttatctgggccagtagcacacgcaggtggttgtgtagacttagcaatattttctttacatttagctggtgcttcttctataatggcttcaataaattttattacaacaataataaatatgcgagctcccggtatgacaatggaccgaactcccttatttgtttgatcaatttttattacaacttttttattattattatcactaccagttttagctggggcaattacaatgcttcttactgaccgtaaaattaaaacttctttctttgaccccacaggagggggagaccctatattatttcaacatttattt	4	75	Ophiocten sericeum	100	BOLD	Yes	No	Insufficient reads
459	North	77.444	27.415	100	50	November	23.11.2017	Nemertea	NA	NA	tttgtctagaaatgtggctcattcagggccttctgtagatttggctattttttctttacatttagcaggggtatcttctattcttgcgtcaattaactttattactaccgcaatgaatatgcgttctagaggtcttcggttagagcgtgtgccgttgtttgtgtggtctgtggctattactgctttacttcttttgttatctttgcctgttcttgcgggagctattacaatattgttaactgatcgaaacttaaatacatctttttttgatcctgccggaggtggagatcctattttgtatcaacatcttttt	8074	99.86	Phyllodoce groenlandica	100	BOLD	Yes	Yes	Phyllodoce groenlandica
460	North	77.444	27.415	100	50	November	23.11.2017	Unknown	NA	NA	actttctaggtctattgctcatgcaggtgggtgtgtagatctcgtaattttttctcttcatttggctggagcttcatctattctagcatctattaattttattgctacaattatcaaaatgcgtgctccaggtatgagaatggattatcttcctctttttatttggtctatacttataactactgttttattattgttgtctttgccggtcttggctggggctatcacaatgttattaactgatcgtaatatcaacacaacattttttgatcccaccggagggggggatcctatcttgttccaacatttgttt	9125	99.98	Ophiacantha bidentata	100	BOLD	Yes	Yes	Ophiacantha bidentata
461	North	77.444	27.415	100	50	November	23.11.2017	Small Limacina?	NA	NA	attaagtaatataggtcacataactcaaagagtagatttttgtattttttcattacatttagcaggtttatcatcaattattggggcaatcaacataattacaacaattatagtaagacgttcaaaaataataacactatctcgaataagattatatttatgaagaatattaattactttaattttattattactatccttacctgtacttgcaggtgctatcacaatactattactagatcgtaattttaacactacattttttgatcctgtaggaggaggtgatccaatcttatttcaacatctattt	61	86.89	Limacina helicina	100	BOLD	No	Yes	Limacina helicina
462	North	77.444	27.415	100	50	November	23.11.2017	Small Limacina?	NA	NA	tcttgcttctaatattgctcattcaggaccttcagttgatttagctattttttctttacatattgcaggagtttcttctattttaggagctctaaattttattactactgttattaatatacgatataaaggattacgacttgaacgtgtaccgctttttgtgtgagctgctaaaattacagcaattctattattattatctttacctgtattagcaggtgctattaccatacttttaactgatcgtaatcttaacaccgctttctttgaccccgcaggtggaggagatcccgttctttaccaacatttattt	14	35.71	Eunoe oerstedi CMC02	100	BOLD	Yes	No	Insufficient reads
463	North	77.444	27.415	100	50	November	23.11.2017	Small Limacina?	NA	NA	attaagtaatataggtcacataactcaaagagtagatttttgtattttttcattacatttagcaggtttatcatcaattattggggcaatcaacataattacaacaattatagtaagacgttcaaaaataataacactatctcgaataagattatatttatgaagaatattaattactttaattttattattactatccttacctgtacttgcaggtgctatcacaatactattactagatcgtaattttaacactacattttttgatcctgtaggaggaggtgatccaatcttatttcaacatctattt	2	100	Limacina helicina	100	BOLD	No	Yes	Insufficient reads
464	North	77.444	27.415	100	50	November	23.11.2017	Gastropod veliger	NA	NA	tctctcaggtgcaattgggcatggaggatgttcagtagatttggctattttttccttacatctggcgggtatgtcttctttgttaggtgctattaattttattactactatttttaatatgcggtctccttctataactatagatcgattaagtttatttgtgtggtcagtattagttactgccttcctattactactttctcttcctgtgttggctggggctattacgatacttttaacagatcgtaattttaacactagatttttcgatccagcaggagggggtgatcctattctatatcaacacttattt	2538	99.72	Nudibranchia	98.4	BOLD	Yes	Yes	Nudibranchia
465	North	77.444	27.415	100	50	November	23.11.2017	Small Limacina?	NA	NA	attaagtaatataggtcacataactcaaagagtagatttttgtattttttcattacatttagcaggtttatcatcaattattggggcaatcaacataattacaacaattatagtaagacgttcaaaaataataacactatctcgaataagattatatttatgaagaatattaattactttaattttattattactatccttacctgtacttgcaggtgctatcacaatactattactagatcgtaattttaacactacattttttgatcctgtaggaggaggtgatccaatcttatttcaacatctattt	9	66.67	Limacina helicina	100	BOLD	No	Yes	Insufficient reads
466	North	77.444	27.415	100	50	November	23.11.2017	Bivalve veliger large white	326	Anterior-posterior length	tctcacgtctattgaatttttaagggatccttctatagatatagcgattttttctttgcatttgggaggtgtgtcttcaatcgcagcaaggttaaattttgcaaggacgtgtgttaatatgcgacaggaggggcgtggcttgcataagatccctatgttccctatctctctggggattactgccttattattaatcattgctataccagttttggcaggggctctaaccatgttgctacttgatcgaaattttgctactaggttttttgaccctgtgggggggggtgatcctattttgtttatacatctattt	831	99.52	Serripes groenlandicus	94.1	BOLD	Yes	Yes	Serripes groenlandicus 94.1 %
467	North	77.444	27.415	100	50	November	23.11.2017	Gastropod veliger	NA	NA	tctttcaggggcaattggacacggtggatgttctgtggatctagctatcttttctcttcatttagctggtatgtcttccttgttgggtgctattaattttattactactatttttaacatacgttctccggagatgactatggatcgattaagtttatttgtttgatcagtgttggttactgcttttttattgcttttatctcttcctgttttagcaggggctattactatgcttttaactgatcgtaattttaacactaggttttttgatcctgcgggaggaggggatcctattttgtatcaacatttattt	3240	99.07	Microchlamylla gracilis	99.7	BOLD	Yes	Yes	Microchlamylla gracilis
468	North	77.444	27.415	100	50	November	23.11.2017	Gastropod veliger	NA	NA	tctttcaggggcaattggacacggtggatgttctgtggatctagctatcttttctcttcatttagctggtatgtcttccttgttgggtgctattaattttattactactatttttaacatacgttctccggagatgactatggatcgattaagtttatttgtttgatcagtgttggttactgcttttttattgcttttatctcttcctgttttagcaggggctattactatgcttttaactgatcgtaattttaacactaggttttttgatcctgcgggaggaggggatcctattttgtatcaacatttattt	6411	99.75	Microchlamylla gracilis	99.7	BOLD	Yes	Yes	Microchlamylla gracilis
469	North	77.444	27.415	100	50	November	23.11.2017	Bivalve veliger large white	198	Anterior-posterior length	attgtcttcatacccattttctggtgcatctatagattttgtaattttctctattcatgttgctggggcttcttctattgctggagctttaaactttttaactacgggtttaaatatgcgaattaaatcaatagagttaaagcgaatacctttatttgtttgatctattattgtaactgcttttctattggtgttagcaatgcctgttttggcgggagctgttactatgcttattagggaccgtcattttaatacaactttttatgatccagcgggagggggggatcctgtattatttgtgcatctattt	5559	61.25	Hiatella sp. K	100	BOLD	Yes	Yes	Hiatella sp. K
470	North	77.444	27.415	100	50	November	23.11.2017	Ball with opening	NA	NA	gctagctagaaacatggcccatgcaggcccatctgtagatttagcaatcttctccctacacctagctggcacctcatccatcttaggttcaatcaattttatcactaccattatcaatatacgcacctctgggttacgactagaacgcatccccttattcgtctgatctcttaaaattacaacaatcctactattactatccttacctgttttagctggggcaatcaccatacttctcacagaccgaaacctaaacacctctttttttgacccaagaggtggtggtgatcctgtcctatttcaacacctattc	5558	38.5	Abyssoninoe	100	BOLD	Yes	Yes	Abyssoninoe
471	North	77.444	27.415	100	50	November	23.11.2017	Empty	NA	NA	ctgtctggtccagttgctcatgctggaggatgtgttgatctagccattttttctttacacttagctggtgcatcctctattatggcttcaattaattttattactactattattaatatgcgagcacccggaatgacaatggaccgaaccccattatttgtgtgatcaattttaataacaacttttcttttattattgtcacttccagtgctagcaggagctattactatgcttttaactgatcgtaatattaaaacttccttctttgaccccacaggaggaggggatcctattttatttcaacacctattt	4	75	Ophiopleura borealis	100	BOLD	Yes	No	Insufficient reads
472	North	77.444	27.415	100	50	November	23.11.2017	Small Limacina?	NA	NA	attaagtaatataggtcacataactcaaagagtagatttttgtattttttcattacatttagcaggtttatcatcaattattggggcaatcaacataattacaacaattatagtaagacgttcaaaaataataacactatctcgaataagattatatttatgaagaatattaattactttaattttattattactatccttacctgtacttgcaggtgctatcacaatactattactagatcgtaattttaacactacattttttgatcctgtaggaggaggtgatccaatcttatttcaacatctattt	53	58.49	Limacina helicina	100	BOLD	No	Yes	Insufficient reads
473	North	77.444	27.415	100	50	November	23.11.2017	Ophiopluteus	547	Posterodorsal arm	actatctgggccagtcgcccatgcaggaggatgtgttgatttagctatattttctcttcatttagctggtgcatcttcgataatggcctctataaaatttattacaacaataattaatatgcgagcacctggaatgacaatggatcgaactcctttatttgtttgatcaattttaataaccacatttcttcttttattatctcttcctgttttagctggagcaattactatgttattaacagatcgaaaaattaaaacttctttttttgatccaacaggaggaggagatccaatcttattccaacatttattt	1373	98.11	Ophiura robusta	100	BOLD	Yes	Yes	Ophiura robusta
474	North	77.444	27.415	100	50	November	23.11.2017	Bivalve veliger large yellow	220	Anterior-posterior length	attgtcttcatacccattttctggtgcatctatagattttgtaattttctctattcatgttgctggggcttcttctattgctggagctttaaactttttaactacgggtttaaatatgcgaattaaatcaatagagttaaagcgaatacctttatttgtttgatctattattgtaactgcttttctattggtgttagcaatgcctgttttggcgggagctgttactatgcttattagggaccgtcattttaatacaactttttatgatccagcgggagggggggatcctgtattatttgtgcatctattt	3948	99.01	Hiatella sp. K	100	BOLD	Yes	Yes	Hiatella sp. K
475	North	77.444	27.415	100	50	November	23.11.2017	Bivalve veliger small	144	Anterior-posterior length	actctctggtaatgtctctcatgccggggggtctgtagatttagctattttttctttacacttagcaggtgcatcttcgattttaggtgctgttaatttcatgtgcacagtaataaatatacgatctgatgatgctgaatttgaacaaacacctttatttgtggtggctatttacttaacagtattacttctgcttttatctctacctgtactagcaggggggatcactatattgttaacagatcgaaattttaatactagattttttgacccagcaggtgggggtgacccagtgctttttgctcatttgttt	5	60	Galathowenia oculata	100	BOLD	Yes	No	Insufficient reads
476	North	77.444	27.415	100	50	November	23.11.2017	Bivalve veliger small	159	Anterior-posterior length	attgtcttcatacccattttctggtgcatctatagattttgtaattttctctattcatgttgctggggcttcttctattgctggagctttaaactttttaactacgggtttaaatatgcgaattaaatcaatagagttaaagcgaatacctttatttgtttgatctattattgtaactgcttttctattggtgttagcaatgcctgttttggcgggagctgttactatgcttattagggaccgtcattttaatacaactttttatgatccagcgggagggggggatcctgtattatttgtgcatctattt	2970	99.9	Hiatella sp. K	100	BOLD	Yes	Yes	Hiatella sp. K
477	North	77.444	27.415	100	50	November	23.11.2017	Bivalve veliger large yellow	271	Anterior-posterior length	attgtcttcatacccattttctggtgcatctatagattttgtaattttctctattcatgttgctggggcttcttctattgctggagctttaaactttttaactacgggtttaaatatgcgaattaaatcaatagagttaaagcgaatacctttatttgtttgatctattattgtaactgcttttctattggtgttagcaatgcctgttttggcgggagctgttactatgcttattagggaccgtcattttaatacaactttttatgatccagcgggagggggggatcctgtattatttgtgcatctattt	2405	99.54	Hiatella sp. K	100	BOLD	Yes	Yes	Hiatella sp. K
482	North	77.444	27.415	100	50	November	23.11.2017	Bivalve veliger large white	243	Anterior-posterior length	tctttcaagaaatttaatagggcattctggtgctgcgggagactttttaattttatctcttcatatcggaggtgcttcatctattatagcatccttaaatttttatagaacgtgaggaaatatgcgtgcaggatgtcatcccttccatcgtgtaccccttttttgtagttctattggggtcacaaggtttcttttaattctagctatgcctgtcttagcaggggcattaacaatactgttaacagatcgcaattttaatactgctttttttgatcctaccggtttaggggaccctatattgtttgttcatttattt	405	97.28	Mya truncata	100	BLAST	Yes	Yes	Mya truncata
483	North	77.444	27.415	100	50	November	23.11.2017	Small Limacina?	NA	NA	attaagtaatataggtcacataactcaaagagtagatttttgtattttttcattacatttagcaggtttatcatcaattattggggcaatcaacataattacaacaattatagtaagacgttcaaaaataataacactatctcgaataagattatatttatgaagaatattaattactttaattttattattactatccttacctgtacttgcaggtgctatcacaatactattactagatcgtaattttaacactacattttttgatcctgtaggaggaggtgatccaatcttatttcaacatctattt	66	96.97	Limacina helicina	100	BOLD	No	Yes	Limacina helicina
484	North	77.444	27.415	100	50	November	23.11.2017	Small Limacina?	NA	NA	attaagtaatataggtcacataactcaaagagtagatttttgtattttttcattacatttagcaggtttatcatcaattattggggcaatcaacataattacaacaattatagtaagacgttcaaaaataataacactatctcgaataagattatatttatgaagaatattaattactttaattttattattactatccttacctgtacttgcaggtgctatcacaatactattactagatcgtaattttaacactacattttttgatcctgtaggaggaggtgatccaatcttatttcaacatctattt	43	74.42	Limacina helicina	100	BOLD	No	Yes	Insufficient reads
485	North	77.444	27.415	100	50	November	23.11.2017	Ball large	NA	NA	cttagcaagaaatattgcccacgcgggcccctctgtagatatggctattttctcccttcaccttgcggggatttcctctatccttggggccattaattttattactacagttattaacatacgatgaagaggattacgactagaacgaatccccctattcgtgtgaggagtagttattactactattctcctacttctatcgctcccggttcttgcgggggccatcactatattacttacagatcgcaacttaaatactgcattctttgaccctgcaggggggggcgatccaattttataccaacatctcttc	1416	99.65	Nothria conchylega CMC02	99	BOLD	Yes	Yes	Nothria conchylega CMC02
486	South	75.5	30	345	45	June	02.07.2018	Polychaeta 3	NA	NA	tctctcttctaatattgcgcatgctggaccgtctgtagacctagctattttttctctacatattgcaggagtctcctctattttaggggctcttaattttattactacagttattaatatacgttataaaggtttacgtcttgaacgtgtcccattatttgtgtgatctgccaaaatcacagctattcttttattactttctttacctgttttagcaggagctattactatactcctcaccgaccgtaatttaaacactgctttttttgatcctgctggaggaggagacccagttttataccagcacttattt	4465	99.44	Harmothoe sp. CMC01	99.7	BOLD	Yes	Yes	Harmothoe sp. CMC01
487	South	75.5	30	345	45	June	02.07.2018	Bivalve	242	Anterior-posterior length	attgtcttcatacccattttctggtgcatctatagattttgtaattttctctattcatgttgctggggcttcttctattgctggagctttaaactttttaactacgggtttaaatatgcgaattaaatcaatagagttaaagcgaatacctttatttgtttgatctattattgtaactgcttttctattggtgttagcaatgcctgttttggcgggagctgttactatgcttattagggaccgtcattttaatacaactttttatgatccagcgggagggggggatcctgtattatttgtgcatctattt	98	100	Hiatella sp. K	100	BOLD	Yes	Yes	Hiatella sp. K
488	South	75.5	30	345	45	June	02.07.2018	Bivalve	229	Anterior-posterior length	attgtcttcatacccattttctggtgcatctatagattttgtaattttctctattcatgttgctggggcttcttctattgctggagctttaaactttttaactacgggtttaaatatgcgaattaaatcaatagagttaaagcgaatacctttatttgtttgatctattattgtaactgcttttctattggtgttagcaatgcctgttttggcgggagctgttactatgcttattagggaccgtcattttaatacaactttttatgatccagcgggagggggggatcctgtattatttgtgcatctattt	3378	98.67	Hiatella sp. K	100	BOLD	Yes	Yes	Hiatella sp. K
489	South	75.5	30	345	45	June	02.07.2018	Polychaeta 2	NA	NA	tctagcctctaacattgcccatgcgggcccttcagttgatctagcaatcttttcgcttcatattgcaggggtctcttcaatcttaggggctctaaattttatcaccactgttttaaatatacggtacaaaggacttcgattagagcgtgtgcctctttttgtttgggctgctaaaattacagctattttattattattaagtctgccggtattggcaggggctattaccatattattaactgatcgaaatttaaacacagcgttttttgaccctgcggggggaggggacccaattctttatcaacatttattt	1104	99.73	Pholoe baltica	100	BOLD	Yes	Yes	Pholoe baltica
490	South	75.5	30	345	45	June	02.07.2018	Bivalve	NA	NA	No sequence	0	0	No sequence	0	No sequence	No sequence	No	Insufficient reads
491	South	75.5	30	345	45	June	02.07.2018	Pectinaria	NA	NA	ctatcaagaaacctagcccatgcaggcccttcagtggaccttgctattttttccttacatttagcaggtatttcctcaattctaggggcaattaattttattacaactgttatcaatatacggtcaaaaggactacggttagaacgtattcccttattcgtatgatctgtaaaaattaccgctatcctccttcttctatctttacctgtcctcgctggtgcaattaccatactactgacagaccgtaatctaaacacctctttctttgaccctgccgggggaggagatcctattctttaccaacacttgttc	2188	97.9	Pectinaria hyperborea	100	BOLD	Yes	Yes	Pectinaria hyperborea
492	South	75.5	30	345	45	June	02.07.2018	Pectinaria	NA	NA	ctatcaagaaacctagcccatgcaggcccttcagtggaccttgctattttttccttacatttagcaggtatttcctcaattctaggggcaattaattttattacaactgttatcaatatacggtcaaaaggactacggttagaacgtattcccttattcgtatgatctgtaaaaattaccgctatcctccttcttctatctttacctgtcctcgctggtgcaattaccatactactgacagaccgtaatctaaacacctctttctttgaccctgccgggggaggagatcctattctttaccaacacttgttc	2319	96.33	Pectinaria hyperborea	100	BOLD	Yes	Yes	Pectinaria hyperborea
493	South	75.5	30	345	45	June	02.07.2018	Bivalve	179	Anterior-posterior length	tttgtcttctactccataccagggggatatttgcacagacatagtaatcttagggttgcatttgtctggggtaagctctactgctggggcgattaattatctggtcacttttttaaacatacgcggaaagtcctataaggcggagttttgtccgcccttcgtttgggctttagccgtaacgagttttttgctaataatatctcttcctgtcctagctggggggctgacaatattaattatggatcgtcactttaactgtacattttttgacccttctggggggggggatcctgtgttgttccagcaccttttt	1683	100	Chlamys islandica	99	BLAST	Yes	Yes	Chlamys islandica
494	South	75.5	30	345	45	June	02.07.2018	Pectinaria	NA	NA	ctatcaagaaacctagcccatgcaggcccttcagtggaccttgctattttttccttacatttagcaggtatttcctcaattctaggggcaattaattttattacaactgttatcaatatacggtcaaaaggactacggttagaacgtattcccttattcgtatgatctgtaaaaattaccgctatcctccttcttctatctttacctgtcctcgctggtgcaattaccatactactgacagaccgtaatctaaacacctctttctttgaccctgccgggggaggagatcctattctttaccaacacttgttc	7153	94.34	Pectinaria hyperborea	100	BOLD	Yes	Yes	Pectinaria hyperborea
495	South	75.5	30	345	45	June	02.07.2018	Bivalve	232	Anterior-posterior length	attgtcttcatacccattttctggtgcatctatagattttgtaattttctctattcatgttgctggggcttcttctattgctggagctttaaactttttaactacgggtttaaatatgcgaattaaatcaatagagttaaagcgaatacctttatttgtttgatctattattgtaactgcttttctattggtgttagcaatgcctgttttggcgggagctgttactatgcttattagggaccgtcattttaatacaactttttatgatccagcgggagggggggatcctgtattatttgtgcatctattt	9434	97.8	Hiatella sp. K	100	BOLD	Yes	Yes	Hiatella sp. K
496	South	75.5	30	345	45	June	02.07.2018	Egg fluffy	NA	NA	ttattcatcttttccagctagtagttcagtttctacagattttattatattttctttgcatttagcgggagctagttctattttatctgctattaattttatagttactatttttttattaccttataatttggttgtttcatttttacagttacctttgtttattgtggctcagttagttgttagttttttacttttaatttctctaccagttttagctgctgctataacaatgttactttttgatcgcaatttttctacttctttttttaataattatttagggggtgacgttttactttatcaacatttattt	2489	97.11	Mnemiopsis leidyi	77.1	BOLD	No	No	Unknown
497	South	75.5	30	345	45	June	02.07.2018	Bivalve	234	Anterior-posterior length	attgtcttcatacccattttctggtgcatctatagattttgtaattttctctattcatgttgctggggcttcttctattgctggagctttaaactttttaactacgggtttaaatatgcgaattaaatcaatagagttaaagcgaatacctttatttgtttgatctattattgtaactgcttttctattggtgttagcaatgcctgttttggcgggagctgttactatgcttattagggaccgtcattttaatacaactttttatgatccagcgggagggggggatcctgtattatttgtgcatctattt	100	95	Hiatella sp. K	100	BOLD	Yes	Yes	Hiatella sp. K
498	South	75.5	30	345	45	June	02.07.2018	Mitraria	NA	NA	actctctggtaatgtctctcatgccggggggtctgtagatttagctattttttctttacacttagcaggtgcatcttcgattttaggtgctgttaatttcatgtgcacagtaataaatatacgatctgatgatgctgaatttgaacaaacacctttatttgtggtggctatttacttaacagtattacttctgcttttatctctacctgtactagcaggggggatcactatattgttaacagatcgaaattttaatactagattttttgacccagcaggtgggggtgacccagtgctttttgctcatttgttt	4296	97.74	Galathowenia oculata	100	BOLD	Yes	Yes	Galathowenia oculata
499	South	75.5	30	345	45	June	02.07.2018	Egg fluffy	NA	NA	gttgagcactgtgggccatagagggggcgctgtggatttgggtatcttctccttacaccttgctggcgttagaagaatcttggggagagctaattttattaccaccatctctaatataaaaggtgaaggcatatctatagaacttatgcctttattcgtgtgggcggtgctcctcacagctatcttacttttgctctctcttcctgtattagctggtgctattactatgttactaacagaccgtaattttaacacctctttctttgaccctgctggtggcggggacccgattttataccaacacctattt	12213	99	Sagitta elegans	94.2	BLAST	No	Yes	Sagitta elegans 94.2 %
500	South	75.5	30	345	45	June	02.07.2018	Bivalve	151	Anterior-posterior length	attgtcttcatacccattttctggtgcatctatagattttgtaattttctctattcatgttgctggggcttcttctattgctggagctttaaactttttaactacgggtttaaatatgcgaattaaatcaatagagttaaagcgaatacctttatttgtttgatctattattgtaactgcttttctattggtgttagcaatgcctgttttggcgggagctgttactatgcttattagggaccgtcattttaatacaactttttatgatccagcgggagggggggatcctgtattatttgtgcatctattt	4550	98.46	Hiatella sp. K	100	BOLD	Yes	Yes	Hiatella sp. K
501	South	75.5	30	345	45	June	02.07.2018	Bivalve	192	Anterior-posterior length	tctttcaagaaatttaatagggcattctggtgctgcgggagactttttaattttatctcttcatatcggaggtgcttcatctattatagcatccttaaatttttatagaacgtgaggaaatatgcgtgcaggatgtcatcccttccatcgtgtaccccttttttgtagttctattggggtcacaaggtttcttttaattctagctatgcctgtcttagcaggggcattaacaatactgttaacagatcgcaattttaatactgctttttttgatcctaccggtttaggggaccctatattgtttgttcatttattt	1419	93.87	Mya truncata	100	BLAST	Yes	Yes	Mya truncata
502	South	75.5	30	345	45	June	02.07.2018	Bivalve	211	Anterior-posterior length	actatctgcttgattaggacatcccgcaccggctatagaatttataattttaggtctacatattgcaggtatgtcttctatttttgcaagaattaattttgtgacaacaggtgctaacatacgtcctgagggggtggcacctcagcgcactactttatttgtagtgtctgtcattattacatcatttttactagtggtggcaatacccgtgttggctgctgggttaactatgcttttaactgatcgaaattttaatacttcttttttcgatcccgtcggaggaggggatcctgtcttatttattcatctcttt	7644	99.54	Macoma calcarea	100	BLAST	Yes	Yes	Macoma calcarea
503	South	75.5	30	345	45	June	02.07.2018	Synchaeta	NA	NA	tttatctgattctaagtatcattctggaatctcagtagatttagctatttttagattacatctagctggaatctcatcaattctgggtagaattaactttataactacaattatttgttcacgtactactaaaatagtaagaatagatcgtttacctctaatgctttgatcattaggagtaacggcatttctattagttactactttaccagttttagcaggtgctattacaatgttactgactgatcgtaactttaatacatcattttttgatccttctggaggaggaaaccctgtactttatcaacacctattt	696	96.41	Synchaetidae	98.1	BOLD	No	Yes	Synchaetidae
504	South	75.5	30	345	45	June	02.07.2018	Pectinaria	NA	NA	ctatcaagaaacctagcccatgcaggcccttcagtggaccttgctattttttccttacatttagcaggtatttcctcaattctaggggcaattaattttattacaactgttatcaatatacggtcaaaaggactacggttagaacgtattcccttattcgtatgatctgtaaaaattaccgctatcctccttcttctatctttacctgtcctcgctggtgcaattaccatactactgacagaccgtaatctaaacacctctttctttgaccctgccgggggaggagatcctattctttaccaacacttgttc	4655	99.42	Pectinaria hyperborea	100	BOLD	Yes	Yes	Pectinaria hyperborea
505	South	75.5	30	345	45	June	02.07.2018	trochophore	NA	NA	ctttctagtaatattgctcatgggggcccagcagttgatatggctattttttcactccacttagccggtatttcttcaattatggcttcaatgaattttttagtgactgtttataatatgcgtacctcttctataattatggagcgggttaccctgttagtttgatctttagcaattaccgctatgttattaattggctctttacctgttctagcggccggtattactatactattaaccgatcgtaatttaaacacgtctttcttcgaccctactggtgggggggatcctgtgttataccagcacttattt	908	99.78	Capitella capitata	89.3	BOLD	Yes	Yes	Capitella capitata 89.3 %
506	South	75.5	30	345	45	June	02.07.2018	Egg fish	NA	NA	ttattcatcttttccagctagtagttcagtttctacagattttattatattttctttgcatttagcgggagctagttctattttatctgctattaattttatagttactatttttttattaccttataatttggttgtttcatttttacagttacctttgtttattgtggctcagttagttgttagttttttacttttaatttctctaccagttttagctgctgctataacaatgttactttttgatcgcaatttttctacttctttttttaataattatttagggggtgacgttttactttatcaacatttattt	3485	99.05	Mnemiopsis leidyi	77.1	BOLD	No	No	Unknown
507	South	75.5	30	345	45	June	02.07.2018	Bivalve	224	Anterior-posterior length	attgtcttcatacccattttctggtgcatctatagattttgtaattttctctattcatgttgctggggcttcttctattgctggagctttaaactttttaactacgggtttaaatatgcgaattaaatcaatagagttaaagcgaatacctttatttgtttgatctattattgtaactgcttttctattggtgttagcaatgcctgttttggcgggagctgttactatgcttattagggaccgtcattttaatacaactttttatgatccagcgggagggggggatcctgtattatttgtgcatctattt	1090	96.51	Hiatella sp. K	100	BOLD	Yes	Yes	Hiatella sp. K
508	South	75.5	30	345	45	June	02.07.2018	Bivalve	156	Anterior-posterior length	attgtcttcatacccattttctggtgcatctatagattttgtaattttctctattcatgttgctggggcttcttctattgctggagctttaaactttttaactacgggtttaaatatgcgaattaaatcaatagagttaaagcgaatacctttatttgtttgatctattattgtaactgcttttctattggtgttagcaatgcctgttttggcgggagctgttactatgcttattagggaccgtcattttaatacaactttttatgatccagcgggagggggggatcctgtattatttgtgcatctattt	956	95.82	Hiatella sp. K	100	BOLD	Yes	Yes	Hiatella sp. K
509	South	75.5	30	345	45	June	02.07.2018	Unknown blob eyes	NA	NA	tttaagtggggtgtttgctcattcaggtgcatcagtagattgtgcaattttttcattacacttagctggtatatcttctattgcgggtgctattaattttatagttaccatttataatatgagatgtcgaggtatgatttttagccgtttacctttatttgtgtgaactgtttgagttactgcttttttattattattatcattacctgttttagctggtgcaattactatgcttttaacagatcgtaatttaaatacaacttttttcgattctgctgcaggaggagatcctttattatatcaacatttattt	930	25.91	Rhizaria	86.5	BLAST	No	No	Insufficient reads
510	South	75.5	30	345	45	June	02.07.2018	Unknown blob eyes	NA	NA	gaggtgatgttcgcttgaatgcagccgtgagacgttacgagaatgcatctttaagtccaaaaacccgagcatcttatacaacaggattgaagactttcctgacattttgtagtttacacaattgcaccaaatttgaacaattaccatgtcccagtgaagatttgttgatattttttgctgtccattgtgcggtgaacctgcatctcgcatattctactattaagttatacctggccggtattcgcaatcgctatatcttatcctgttggggcaaccccctgcaaagggagggtgccccattgttgcgacttcaat	271	25.09	No match	0	No match	No match	No	Insufficient reads
511	South	75.5	30	345	45	June	02.07.2018	Egg oval	NA	NA	attaagcacttctttcatgagcttatcaccttcaagtacaggaaatcttatctttggtttattaatctctggtatatcctcatgtctcacatctcttaatttctatacaacaattctaaatctgagatcttattatctgaatttaaagactatgccattattcccttgggctctcttcattacaggaggaatgcttttattaacattaccaatcttatcaggagctcttctaatggtcttggctgatcttcattctaatacacttttctttgaaccaatctttggaggagatcctatattctatcaacacttattt	4204	99.6	Thoracosphaera heimii	96.8	BLAST	No	No	Unknown
512	South	75.5	30	345	45	June	02.07.2018	Polychaeta 2	NA	NA	tctagcctctaacattgcccatgcgggcccttcagttgatctagcaatcttttcgcttcatattgcaggggtctcttcaatcttaggggctctaaattttatcaccactgttttaaatatacggtacaaaggacttcgattagagcgtgtgcctctttttgtttgggctgctaaaattacagctattttattattattaagtctgccggtattggcaggggctattaccatattattaactgatcgaaatttaaacacagcgttttttgaccctgcggggggaggggacccaattctttatcaacatttattt	8422	99.23	Pholoe baltica	100	BOLD	Yes	Yes	Pholoe baltica
513	South	75.5	30	345	45	June	02.07.2018	Bivalve	234	Anterior-posterior length	tctttcttcttatccattttctggggcatctatagattttgtaattttttctattcatgttgcaggtgcctcatctattgctggtgctttaaattttttaactactggacttaatatacgtattaaatctatagaattgaagcgcatgcctttgtttgtttggtcaattattgtgaccgcttttttattggttttagcaatgcctgttttagctggggctgtcactatgttaattagggatcgtcattttaatacaactttttatgatcctgctgggggaggtgatcctgtgctgtttgttcatttattt	6711	98.33	Hiatella sp. I	85.3	BOLD	Yes	Yes	Hiatella sp. I 85.3 %
514	South	75.5	30	345	45	June	02.07.2018	Bivalve	261	Anterior-posterior length	attgtcttcatacccattttctggtgcatctatagattttgtaattttctctattcatgttgctggggcttcttctattgctggagctttaaactttttaactacgggtttaaatatgcgaattaaatcaatagagttaaagcgaatacctttatttgtttgatctattattgtaactgcttttctattggtgttagcaatgcctgttttggcgggagctgttactatgcttattagggaccgtcattttaatacaactttttatgatccagcgggagggggggatcctgtattatttgtgcatctattt	348	91.95	Hiatella sp. K	100	BOLD	Yes	Yes	Hiatella sp. K
515	South	75.5	30	345	45	June	02.07.2018	Bivalve	178	Anterior-posterior length	attgtcttcatacccattttctggtgcatctatagattttgtaattttctctattcatgttgctggggcttcttctattgctggagctttaaactttttaactacgggtttaaatatgcgaattaaatcaatagagttaaagcgaatacctttatttgtttgatctattattgtaactgcttttctattggtgttagcaatgcctgttttggcgggagctgttactatgcttattagggaccgtcattttaatacaactttttatgatccagcgggagggggggatcctgtattatttgtgcatctattt	4707	98.41	Hiatella sp. K	100	BOLD	Yes	Yes	Hiatella sp. K
516	South	75.5	30	345	45	June	02.07.2018	Bivalve	219	Anterior-posterior length	attgtcttcatacccattttctggtgcatctatagattttgtaattttctctattcatgttgctggggcttcttctattgctggagctttaaactttttaactacgggtttaaatatgcgaattaaatcaatagagttaaagcgaatacctttatttgtttgatctattattgtaactgcttttctattggtgttagcaatgcctgttttggcgggagctgttactatgcttattagggaccgtcattttaatacaactttttatgatccagcgggagggggggatcctgtattatttgtgcatctattt	80	98.75	Hiatella sp. K	100	BOLD	Yes	Yes	Hiatella sp. K
517	South	75.5	30	345	45	June	02.07.2018	Unknown blob eyes	NA	NA	attgtcttcatacccattttctggtgcatctatagattttgtaattttctctattcatgttgctggggcttcttctattgctggagctttaaactttttaactacgggtttaaatatgcgaattaaatcaatagagttaaagcgaatacctttatttgtttgatctattattgtaactgcttttctattggtgttagcaatgcctgttttggcgggagctgttactatgcttattagggaccgtcattttaatacaactttttatgatccagcgggagggggggatcctgtattatttgtgcatctattt	92	16.3	Hiatella sp. K	100	BOLD	Yes	No	Insufficient reads
518	South	75.5	30	345	45	June	02.07.2018	Bivalve	220	Anterior-posterior length	attgtcttcatacccattttctggtgcatctatagattttgtaattttctctattcatgttgctggggcttcttctattgctggagctttaaactttttaactacgggtttaaatatgcgaattaaatcaatagagttaaagcgaatacctttatttgtttgatctattattgtaactgcttttctattggtgttagcaatgcctgttttggcgggagctgttactatgcttattagggaccgtcattttaatacaactttttatgatccagcgggagggggggatcctgtattatttgtgcatctattt	5063	97.02	Hiatella sp. K	100	BOLD	Yes	Yes	Hiatella sp. K
521	South	75.94	29.966	200	40	April	30.04.2018	Ophiopluteus small	208	Posterodorsal arm	ttatcaggtccggtagctcacgcaggtggttgtgtagatttagcaatattttctttacatttagctggtgcttcttctataatggcctcaataaattttataactacaataattaatatgcgagctcccggtatgacaatggaccgagtccctttatttgtttgatcaatttttattacaacttttttattattattatctttaccagttttagctggtgcaattacaatgttattaactgaccgtaatataaaaacttccttttttgatccaacaggaggaggagacccaatattattccaacacttgttc	114	92.98	Ophiocten gracilis	100	BOLD	Yes	Yes	Ophiocten gracilis
522	South	75.94	29.966	200	40	April	30.04.2018	Egg dark	NA	NA	tctggccagaaatgtggcacacgcaggaagttctgtagactttgctatcttctctcttcacttagcaggggtctcctcaatcttaggggctattaactttattaggactctgggaaaccttcgtgtctttggtatgttcctagatcgaatacccctgttcgcatgagcagttcttattacaacaattttacttcttttgtcccttcctgtgctcgcaggggccatcacgatattattaacagaccggaacctgaatacctcgttttatgacgtgggaggagggggggaccctattctctaccagcacctgttt	308	99.35	Metridia longa	99.6	BOLD	No	Yes	Metridia longa
523	South	75.94	29.966	200	40	April	30.04.2018	Ophiopluteus small	307	Posterodorsal arm	ttatcaggtccggtagctcacgcaggtggttgtgtagatttagcaatattttctttacatttagctggtgcttcttctataatggcctcaataaattttataactacaataattaatatgcgagctcccggtatgacaatggaccgagtccctttatttgtttgatcaatttttattacaacttttttattattattatctttaccagttttagctggtgcaattacaatgttattaactgaccgtaatataaaaacttccttttttgatccaacaggaggaggagacccaatattattccaacacttgttc	3996	99.3	Ophiocten gracilis	100	BOLD	Yes	Yes	Ophiocten gracilis
524	South	75.94	29.966	200	40	April	30.04.2018	Ophiopluteus small	NA	NA	tctggccagaaatgtggcacacgcaggaagttctgtagactttgctatcttctctcttcacttagcaggggtctcctcaatcttaggggctattaactttattaggactctgggaaaccttcgtgtctttggtatgttcctagatcgaatacccctgttcgcatgagcagttcttattacaacaattttacttcttttgtcccttcctgtgctcgcaggggccatcacgatattattaacagaccggaacctgaatacctcgttttatgacgtgggaggagggggggaccctattctctaccagcacctgttt	608	94.57	Metridia longa	99.6	BOLD	No	No	Unknown
525	South	75.94	29.966	200	40	April	30.04.2018	Egg dark	NA	NA	tctggccagaaatgtggcacacgcaggaagttctgtagactttgctatcttctctcttcacttagcaggggtctcctcaatcttaggggctattaactttattaggactctgggaaaccttcgtgtctttggtatgttcctagatcgaatacccctgttcgcatgagcagttcttattacaacaattttacttcttttgtcccttcctgtgctcgcaggggccatcacgatattattaacagaccggaacctgaatacctcgttttatgacgtgggaggagggggggaccctattctctaccagcacctgttt	566	91.34	Metridia longa	99.6	BOLD	No	Yes	Metridia longa
526	South	75.94	29.966	200	40	April	30.04.2018	Ophiopluteus small	333	Posterodorsal arm	ttatcaggtccggtagctcacgcaggtggttgtgtagatttagcaatattttctttacatttagctggtgcttcttctataatggcctcaataaattttataactacaataattaatatgcgagctcccggtatgacaatggaccgagtccctttatttgtttgatcaatttttattacaacttttttattattattatctttaccagttttagctggtgcaattacaatgttattaactgaccgtaatataaaaacttccttttttgatccaacaggaggaggagacccaatattattccaacacttgttc	11757	98.26	Ophiocten gracilis	100	BOLD	Yes	Yes	Ophiocten gracilis
527	South	75.94	29.966	200	40	April	30.04.2018	Ophiopluteus small	463	Posterodorsal arm	ttatcaggtccggtagctcacgcaggtggttgtgtagatttagcaatattttctttacatttagctggtgcttcttctataatggcctcaataaattttataactacaataattaatatgcgagctcccggtatgacaatggaccgagtccctttatttgtttgatcaatttttattacaacttttttattattattatctttaccagttttagctggtgcaattacaatgttattaactgaccgtaatataaaaacttccttttttgatccaacaggaggaggagacccaatattattccaacacttgttc	5635	99.47	Ophiocten gracilis	100	BOLD	Yes	Yes	Ophiocten gracilis
528	South	75.94	29.966	200	40	April	30.04.2018	Egg dark	NA	NA	tatcaagtaatattgcacatgcgggggcttctgtggattttgctatcttctccctgcacttagccggagttagctcgatcttgggtgctgtaaattttattagtactttggggaaccttcgtgtgtttggtatacttttagaccgtatgccactatttgcttgggcggtactcattaccgctgtccttctcctattatcattacccgtcctagcaggagctatcaccatattattaacagatcgaaacctaaatacgaccttctatgacgtggggggggggagatcctatcttataccagcacctattt	2042	96.91	Calanus glacialis	100	BOLD	No	Yes	Calanus glacialis
529	South	75.94	29.966	200	40	April	30.04.2018	Egg fish	NA	NA	gctagcaagaaatatttctcatagaggaagatctgttgaccttgcaatcttctcccttcatctggcaggtgcttcttctattctaggagctattaattttataactactattattaacatgcgaagatcgtcaataacttttgctcggatacccctattcatctgatccgtatttattacagctattttactggtcctttccttaccagtcctagcgggtgcaattacaatacttctcacggaccgtaatttaaataccacttttttcgaccctgctgggggaggggatcccatcctataccaacacttattt	4803	99.58	Alcyonidium mamillatum	99.4	BLAST	Yes	No	Unknown
530	South	75.94	29.966	200	40	April	30.04.2018	Cyphonaute	NA	NA	gctagcaagaaatatttctcatagaggaagatctgttgaccttgcaatcttctcccttcatctggcaggtgcttcttctattctaggagctattaattttataactactattattaacatgcgaagatcgtcaataacttttgctcggatacccctattcatctgatccgtatttattacagctattttactggtcctttccttaccagtcctagcgggtgcaattacaatacttctcacggaccgtaatttaaataccacttttttcgaccctgctgggggaggggatcccatcctataccaacacttattt	15238	99.65	Alcyonidium mamillatum	99.4	BLAST	Yes	Yes	Alcyonidium mamillatum
531	South	75.94	29.966	200	40	April	30.04.2018	Egg dark	NA	NA	tctggccagaaatgtggcacacgcaggaagttctgtagactttgctatcttctctcttcacttagcaggggtctcctcaatcttaggggctattaactttattaggactctgggaaaccttcgtgtctttggtatgttcctagatcgaatacccctgttcgcatgagcagttcttattacaacaattttacttcttttgtcccttcctgtgctcgcaggggccatcacgatattattaacagaccggaacctgaatacctcgttttatgacgtgggaggagggggggaccctattctctaccagcacctgttt	565	94.16	Metridia longa	99.6	BOLD	No	Yes	Metridia longa
532	South	75.94	29.966	200	40	April	30.04.2018	Ophiopluteus small	367	Posterodorsal arm	ttatcaggtccggtagctcacgcaggtggttgtgtagatttagcaatattttctttacatttagctggtgcttcttctataatggcctcaataaattttataactacaataattaatatgcgagctcccggtatgacaatggaccgagtccctttatttgtttgatcaatttttattacaacttttttattattattatctttaccagttttagctggtgcaattacaatgttattaactgaccgtaatataaaaacttccttttttgatccaacaggaggaggagacccaatattattccaacacttgttc	446	96.19	Ophiocten gracilis	100	BOLD	Yes	Yes	Ophiocten gracilis
533	South	75.94	29.966	200	40	April	30.04.2018	Egg dark	NA	NA	tctggccagaaatgtggcacacgcaggaagttctgtagactttgctatcttctctcttcacttagcaggggtctcctcaatcttaggggctattaactttattaggactctgggaaaccttcgtgtctttggtatgttcctagatcgaatacccctgttcgcatgagcagttcttattacaacaattttacttcttttgtcccttcctgtgctcgcaggggccatcacgatattattaacagaccggaacctgaatacctcgttttatgacgtgggaggagggggggaccctattctctaccagcacctgttt	2444	99.55	Metridia longa	99.6	BOLD	No	Yes	Metridia longa
534	South	75.94	29.966	200	40	April	30.04.2018	Ophiopluteus small	406	Posterodorsal arm	ttatcaggtccggtagctcacgcaggtggttgtgtagatttagcaatattttctttacatttagctggtgcttcttctataatggcctcaataaattttataactacaataattaatatgcgagctcccggtatgacaatggaccgagtccctttatttgtttgatcaatttttattacaacttttttattattattatctttaccagttttagctggtgcaattacaatgttattaactgaccgtaatataaaaacttccttttttgatccaacaggaggaggagacccaatattattccaacacttgttc	3628	95.23	Ophiocten gracilis	100	BOLD	Yes	Yes	Ophiocten gracilis
535	South	75.94	29.966	200	40	April	30.04.2018	Ophiopluteus small	311	Posterodorsal arm	ttatcaggtccggtagctcacgcaggtggttgtgtagatttagcaatattttctttacatttagctggtgcttcttctataatggcctcaataaattttataactacaataattaatatgcgagctcccggtatgacaatggaccgagtccctttatttgtttgatcaatttttattacaacttttttattattattatctttaccagttttagctggtgcaattacaatgttattaactgaccgtaatataaaaacttccttttttgatccaacaggaggaggagacccaatattattccaacacttgttc	2354	98.94	Ophiocten gracilis	100	BOLD	Yes	Yes	Ophiocten gracilis
536	South	75.94	29.966	200	40	April	30.04.2018	Ophiopluteus small	405	Posterodorsal arm	ttatcaggtccggtagctcacgcaggtggttgtgtagatttagcaatattttctttacatttagctggtgcttcttctataatggcctcaataaattttataactacaataattaatatgcgagctcccggtatgacaatggaccgagtccctttatttgtttgatcaatttttattacaacttttttattattattatctttaccagttttagctggtgcaattacaatgttattaactgaccgtaatataaaaacttccttttttgatccaacaggaggaggagacccaatattattccaacacttgttc	688	98.55	Ophiocten gracilis	100	BOLD	Yes	Yes	Ophiocten gracilis
537	South	75.94	29.966	200	40	April	30.04.2018	Ophiopluteus large	906	Posterodorsal arm	tttatctgggccagtagcacacgcaggtggttgtgtagacttagcaatattttctttacatttagctggtgcttcttctataatggcttcaataaattttattacaacaataataaatatgcgagctcccggtatgacaatggaccgaactcccttatttgtttgatcaatttttattacaacttttttattattattatcactaccagttttagctggggcaattacaatgcttcttactgaccgtaaaattaaaacttctttctttgaccccacaggagggggagaccctatattatttcaacatttattt	9216	98.83	Ophiocten sericeum	100	BOLD	Yes	Yes	Ophiocten sericeum
538	South	75.94	29.966	200	40	April	30.04.2018	Ophiopluteus small	351	Posterodorsal arm	tttgtcaggaattttagctcattctggtggcgctgtcgatttagctatttttagcttacatttggcgggtatttcgtctattttaggagctataaattttattgtaactattttaaacatgcgttgtcctggtatgactgctcatagaacacctttatttgtttgggctgtttttataacagcttttttacttttgttatcacttcctgttttagctggcgctattacaatgttattaacagatagaaattttaatacgtctttctttgatccaaacggtggtggtgatcctgtcttatatcagcatttgttt	2625	98.1	Phaeocystis antarctica	91.6	BOLD	No	No	Unknown
539	South	75.94	29.966	200	40	April	30.04.2018	Ophiopluteus small	339	Posterodorsal arm	ttatcaggtccggtagctcacgcaggtggttgtgtagatttagcaatattttctttacatttagctggtgcttcttctataatggcctcaataaattttataactacaataattaatatgcgagctcccggtatgacaatggaccgagtccctttatttgtttgatcaatttttattacaacttttttattattattatctttaccagttttagctggtgcaattacaatgttattaactgaccgtaatataaaaacttccttttttgatccaacaggaggaggagacccaatattattccaacacttgttc	10508	46.23	Ophiocten gracilis	100	BOLD	Yes	Yes	Ophiocten gracilis
540	South	75.94	29.966	200	40	April	30.04.2018	Ophiopluteus small	386	Posterodorsal arm	ttatcaggtccggtagctcacgcaggtggttgtgtagatttagcaatattttctttacatttagctggtgcttcttctataatggcctcaataaattttataactacaataattaatatgcgagctcccggtatgacaatggaccgagtccctttatttgtttgatcaatttttattacaacttttttattattattatctttaccagttttagctggtgcaattacaatgttattaactgaccgtaatataaaaacttccttttttgatccaacaggaggaggagacccaatattattccaacacttgttc	1055	40.47	Ophiocten gracilis	100	BOLD	Yes	Yes	Ophiocten gracilis
541	South	75.94	29.966	200	40	April	30.04.2018	Empty?	NA	NA	tttgtcaggaattttagctcattctggtggcgctgtcgatttagctatttttagcttacatttggcgggtatttcgtctattttaggagctataaattttattgtaactattttaaacatgcgttgtcctggtatgactgctcatagaacacctttatttgtttgggctgtttttataacagcttttttacttttgttatcacttcctgttttagctggcgctattacaatgttattaacagatagaaattttaatacgtctttctttgatccaaacggtggtggtgatcctgtcttatatcagcatttgttt	15503	65.18	Phaeocystis antarctica	91.6	BOLD	No	No	Unknown
542	South	75.94	29.966	200	40	April	30.04.2018	Ophiopluteus small	403	Posterodorsal arm	ttatcaggtccggtagctcacgcaggtggttgtgtagatttagcaatattttctttacatttagctggtgcttcttctataatggcctcaataaattttataactacaataattaatatgcgagctcccggtatgacaatggaccgagtccctttatttgtttgatcaatttttattacaacttttttattattattatctttaccagttttagctggtgcaattacaatgttattaactgaccgtaatataaaaacttccttttttgatccaacaggaggaggagacccaatattattccaacacttgttc	996	50.2	Ophiocten gracilis	100	BOLD	Yes	Yes	Insufficient reads
543	South	75.94	29.966	200	40	April	30.04.2018	Ophiopluteus small	334	Posterodorsal arm	tttgtcaggaattttagctcattctggtggcgctgtcgatttagctatttttagcttacatttggcgggtatttcgtctattttaggagctataaattttattgtaactattttaaacatgcgttgtcctggtatgactgctcatagaacacctttatttgtttgggctgtttttataacagcttttttacttttgttatcacttcctgttttagctggcgctattacaatgttattaacagatagaaattttaatacgtctttctttgatccaaacggtggtggtgatcctgtcttatatcagcatttgttt	2804	70.26	Phaeocystis antarctica	91.6	BOLD	No	No	Unknown
544	South	75.94	29.966	200	40	April	30.04.2018	Ophiopluteus small	343	Posterodorsal arm	ttatcaggtccggtagctcacgcaggtggttgtgtagatttagcaatattttctttacatttagctggtgcttcttctataatggcctcaataaattttataactacaataattaatatgcgagctcccggtatgacaatggaccgagtccctttatttgtttgatcaatttttattacaacttttttattattattatctttaccagttttagctggtgcaattacaatgttattaactgaccgtaatataaaaacttccttttttgatccaacaggaggaggagacccaatattattccaacacttgttc	9197	98.68	Ophiocten gracilis	100	BOLD	Yes	Yes	Ophiocten gracilis
545	South	75.94	29.966	200	40	April	30.04.2018	Ophiopluteus small	331	Posterodorsal arm	ttatcaggtccggtagctcacgcaggtggttgtgtagatttagcaatattttctttacatttagctggtgcttcttctataatggcctcaataaattttataactacaataattaatatgcgagctcccggtatgacaatggaccgagtccctttatttgtttgatcaatttttattacaacttttttattattattatctttaccagttttagctggtgcaattacaatgttattaactgaccgtaatataaaaacttccttttttgatccaacaggaggaggagacccaatattattccaacacttgttc	6554	99.31	Ophiocten gracilis	100	BOLD	Yes	Yes	Ophiocten gracilis
546	South	75.94	29.966	200	40	April	30.04.2018	Ophiopluteus small	378	Posterodorsal arm	ttatcaggtccggtagctcacgcaggtggttgtgtagatttagcaatattttctttacatttagctggtgcttcttctataatggcctcaataaattttataactacaataattaatatgcgagctcccggtatgacaatggaccgagtccctttatttgtttgatcaatttttattacaacttttttattattattatctttaccagttttagctggtgcaattacaatgttattaactgaccgtaatataaaaacttccttttttgatccaacaggaggaggagacccaatattattccaacacttgttc	2365	91.75	Ophiocten gracilis	100	BOLD	Yes	Yes	Ophiocten gracilis
547	South	75.94	29.966	200	40	April	30.04.2018	Ophiopluteus small	219	Posterodorsal arm	ttatcaggtccggtagctcacgcaggtggttgtgtagatttagcaatattttctttacatttagctggtgcttcttctataatggcctcaataaattttataactacaataattaatatgcgagctcccggtatgacaatggaccgagtccctttatttgtttgatcaatttttattacaacttttttattattattatctttaccagttttagctggtgcaattacaatgttattaactgaccgtaatataaaaacttccttttttgatccaacaggaggaggagacccaatattattccaacacttgttc	4703	96.98	Ophiocten gracilis	100	BOLD	Yes	Yes	Ophiocten gracilis
548	South	75.94	29.966	200	40	April	30.04.2018	Ophiopluteus small	364	Posterodorsal arm	ttatcaggtccggtagctcacgcaggtggttgtgtagatttagcaatattttctttacatttagctggtgcttcttctataatggcctcaataaattttataactacaataattaatatgcgagctcccggtatgacaatggaccgagtccctttatttgtttgatcaatttttattacaacttttttattattattatctttaccagttttagctggtgcaattacaatgttattaactgaccgtaatataaaaacttccttttttgatccaacaggaggaggagacccaatattattccaacacttgttc	1207	97.51	Ophiocten gracilis	100	BOLD	Yes	Yes	Ophiocten gracilis
549	South	75.94	29.966	200	40	April	30.04.2018	Ophiopluteus small	455	Posterodorsal arm	ttatcaggtccggtagctcacgcaggtggttgtgtagatttagcaatattttctttacatttagctggtgcttcttctataatggcctcaataaattttataactacaataattaatatgcgagctcccggtatgacaatggaccgagtccctttatttgtttgatcaatttttattacaacttttttattattattatctttaccagttttagctggtgcaattacaatgttattaactgaccgtaatataaaaacttccttttttgatccaacaggaggaggagacccaatattattccaacacttgttc	8366	98.66	Ophiocten gracilis	100	BOLD	Yes	Yes	Ophiocten gracilis
550	South	75.94	29.966	200	40	April	30.04.2018	Ophiopluteus small	372	Posterodorsal arm	ttatcaggtccggtagctcacgcaggtggttgtgtagatttagcaatattttctttacatttagctggtgcttcttctataatggcctcaataaattttataactacaataattaatatgcgagctcccggtatgacaatggaccgagtccctttatttgtttgatcaatttttattacaacttttttattattattatctttaccagttttagctggtgcaattacaatgttattaactgaccgtaatataaaaacttccttttttgatccaacaggaggaggagacccaatattattccaacacttgttc	4120	96.99	Ophiocten gracilis	100	BOLD	Yes	Yes	Ophiocten gracilis
551	South	75.94	29.966	200	40	April	30.04.2018	Ophiopluteus small	298	Posterodorsal arm	ttatcaggtccggtagctcacgcaggtggttgtgtagatttagcaatattttctttacatttagctggtgcttcttctataatggcctcaataaattttataactacaataattaatatgcgagctcccggtatgacaatggaccgagtccctttatttgtttgatcaatttttattacaacttttttattattattatctttaccagttttagctggtgcaattacaatgttattaactgaccgtaatataaaaacttccttttttgatccaacaggaggaggagacccaatattattccaacacttgttc	2826	99.19	Ophiocten gracilis	100	BOLD	Yes	Yes	Ophiocten gracilis
552	South	75.94	29.966	200	40	April	30.04.2018	Ophiopluteus small	366	Posterodorsal arm	ttatcaggtccggtagctcacgcaggtggttgtgtagatttagcaatattttctttacatttagctggtgcttcttctataatggcctcaataaattttataactacaataattaatatgcgagctcccggtatgacaatggaccgagtccctttatttgtttgatcaatttttattacaacttttttattattattatctttaccagttttagctggtgcaattacaatgttattaactgaccgtaatataaaaacttccttttttgatccaacaggaggaggagacccaatattattccaacacttgttc	5231	99.41	Ophiocten gracilis	100	BOLD	Yes	Yes	Ophiocten gracilis
553	South	75.94	29.966	200	40	April	30.04.2018	Unknown fleshy ball	NA	NA	ttatcagctggtattgcacatgcaggagcctctgttgatatgggaattttttctttacatattgctggagcttcatctattttgggagcagtaaattttattactactgtaattaacatacgatctgcgggaatgacaatagaccgaattcctttatttgtatgatcagtatttattacagctattttacttttattatctttaccggttctagcaggagctattactatacttttaacagatcgtaatttaaatacctctttttttgaccctgcaggaggaggagaccctattttatatcaacatttattt	7674	99.87	Thysanoessa inermis	100	BOLD	No	Yes	Thysanoessa inermis
554	South	75.94	29.966	200	40	April	30.04.2018	Egg dark	NA	NA	attgtcttcatacccattttctggtgcatctatagattttgtaattttctctattcatgttgctggggcttcttctattgctggagctttaaactttttaactacgggtttaaatatgcgaattaaatcaatagagttaaagcgaatacctttatttgtttgatctattattgtaactgcttttctattggtgttagcaatgcctgttttggcgggagctgttactatgcttattagggaccgtcattttaatacaactttttatgatccagcgggagggggggatcctgtattatttgtgcatctattt	19	47.37	Hiatella sp. K	100	BOLD	Yes	No	Insufficient reads
555	South	75.94	29.966	200	40	April	30.04.2018	Egg dark	NA	NA	tctggccagaaatgtggcacacgcaggaagttctgtagactttgctatcttctctcttcacttagcaggggtctcctcaatcttaggggctattaactttattaggactctgggaaaccttcgtgtctttggtatgttcctagatcgaatacccctgttcgcatgagcagttcttattacaacaattttacttcttttgtcccttcctgtgctcgcaggggccatcacgatattattaacagaccggaacctgaatacctcgttttatgacgtgggaggagggggggaccctattctctaccagcacctgttt	4816	92.3	Metridia longa	99.6	BOLD	No	Yes	Metridia longa
556	South	75.94	29.966	200	40	April	30.04.2018	Egg dark	NA	NA	tttatcaggtattgttgcacactcttcgccttctattgatttagctatatttagtttacatttagcaggtatttcttcattagcaggttctataaattatattactactatatttaatatgagggtagttaaatatgattttttcagattacctttatttatatgagctatgttagttacagcttatttactaatagctactttacctgtgttagcaggtgctataactatgttattaactgatagaaattttaatacttcgtttttcgatccagcaggaggtggagatcctatattatatcaacatcttttt	1964	64.21	Paramoeba branchiphila	87.5	BLAST	No	No	Unknown
557	South	75.94	29.966	200	40	April	30.04.2018	Planula	NA	NA	tctggccagaaatgtggcacacgcaggaagttctgtagactttgctatcttctctcttcacttagcaggggtctcctcaatcttaggggctattaactttattaggactctgggaaaccttcgtgtctttggtatgttcctagatcgaatacccctgttcgcatgagcagttcttattacaacaattttacttcttttgtcccttcctgtgctcgcaggggccatcacgatattattaacagaccggaacctgaatacctcgttttatgacgtgggaggagggggggaccctattctctaccagcacctgttt	251	90.84	Metridia longa	99.6	BOLD	No	No	Unknown
558	South	75.94	29.966	200	40	April	30.04.2018	Ophiopluteus small	325	Posterodorsal arm	ttatcaggtccggtagctcacgcaggtggttgtgtagatttagcaatattttctttacatttagctggtgcttcttctataatggcctcaataaattttataactacaataattaatatgcgagctcccggtatgacaatggaccgagtccctttatttgtttgatcaatttttattacaacttttttattattattatctttaccagttttagctggtgcaattacaatgttattaactgaccgtaatataaaaacttccttttttgatccaacaggaggaggagacccaatattattccaacacttgttc	98	88.78	Ophiocten gracilis	100	BOLD	Yes	Yes	Ophiocten gracilis
559	South	75.94	29.966	200	40	April	30.04.2018	Ophiopluteus small	285	Posterodorsal arm	ttatcaggtccggtagctcacgcaggtggttgtgtagatttagcaatattttctttacatttagctggtgcttcttctataatggcctcaataaattttataactacaataattaatatgcgagctcccggtatgacaatggaccgagtccctttatttgtttgatcaatttttattacaacttttttattattattatctttaccagttttagctggtgcaattacaatgttattaactgaccgtaatataaaaacttccttttttgatccaacaggaggaggagacccaatattattccaacacttgttc	3867	98.99	Ophiocten gracilis	100	BOLD	Yes	Yes	Ophiocten gracilis
560	South	75.94	29.966	200	40	April	30.04.2018	Egg fish	NA	NA	gttgagcactgtgggccatagagggggcgctgtggatttgggtatcttctccttacaccttgctggcgttagaagaatcttggggagagctaattttattaccaccatctctaatataaaaggtgaaggcatatctatagaacttatgcctttattcgtgtgggcggtgctcctcacagctatcttacttttgctctctcttcctgtattagctggtgctattactatgttactaacagaccgtaattttaacacctctttctttgaccctgctggtggcggggacccgattttataccaacacctattt	13659	99.16	Sagitta elegans	94.2	BLAST	No	Yes	Sagitta elegans 94.2 %
561	South	75.94	29.966	200	40	April	30.04.2018	Ophiopluteus small	296	Posterodorsal arm	ttatcaggtccggtagctcacgcaggtggttgtgtagatttagcaatattttctttacatttagctggtgcttcttctataatggcctcaataaattttataactacaataattaatatgcgagctcccggtatgacaatggaccgagtccctttatttgtttgatcaatttttattacaacttttttattattattatctttaccagttttagctggtgcaattacaatgttattaactgaccgtaatataaaaacttccttttttgatccaacaggaggaggagacccaatattattccaacacttgttc	1471	97.42	Ophiocten gracilis	100	BOLD	Yes	Yes	Ophiocten gracilis
562	South	75.94	29.966	200	40	April	30.04.2018	Ophiopluteus small	355	Posterodorsal arm	ttatcaggtccggtagctcacgcaggtggttgtgtagatttagcaatattttctttacatttagctggtgcttcttctataatggcctcaataaattttataactacaataattaatatgcgagctcccggtatgacaatggaccgagtccctttatttgtttgatcaatttttattacaacttttttattattattatctttaccagttttagctggtgcaattacaatgttattaactgaccgtaatataaaaacttccttttttgatccaacaggaggaggagacccaatattattccaacacttgttc	305	95.41	Ophiocten gracilis	100	BOLD	Yes	Yes	Ophiocten gracilis
563	South	75.94	29.966	200	40	April	30.04.2018	Ophiopluteus small	404	Posterodorsal arm	ttatcaggtccggtagctcacgcaggtggttgtgtagatttagcaatattttctttacatttagctggtgcttcttctataatggcctcaataaattttataactacaataattaatatgcgagctcccggtatgacaatggaccgagtccctttatttgtttgatcaatttttattacaacttttttattattattatctttaccagttttagctggtgcaattacaatgttattaactgaccgtaatataaaaacttccttttttgatccaacaggaggaggagacccaatattattccaacacttgttc	8186	97.91	Ophiocten gracilis	100	BOLD	Yes	Yes	Ophiocten gracilis
564	South	75.94	29.966	200	40	April	30.04.2018	Jelly	NA	NA	atatagttctttcccagcagctccttctatttctactgattttataatattttctttacatttagcaggtgctagtagtatcttgtcttctattaattttgtttccactgttttttttttacctatttcctccaagttttctttttttcaatatcctttgtttattatagcccaattaactgtttcttttttacttataatttctttgcctgtattagctgctgccattactatgcttttatttgacagaaatttttccacttctttcttttctaattttttaggtggtgatgccttgttatatcaacatttattt	995	87.24	Beroe	96.4	BLAST	No	Yes	Beroe 96.4 %
565	South	75.94	29.966	200	40	April	30.04.2018	Ophiopluteus small	418	Posterodorsal arm	ttatcaggtccggtagctcacgcaggtggttgtgtagatttagcaatattttctttacatttagctggtgcttcttctataatggcctcaataaattttataactacaataattaatatgcgagctcccggtatgacaatggaccgagtccctttatttgtttgatcaatttttattacaacttttttattattattatctttaccagttttagctggtgcaattacaatgttattaactgaccgtaatataaaaacttccttttttgatccaacaggaggaggagacccaatattattccaacacttgttc	4057	99.68	Ophiocten gracilis	100	BOLD	Yes	Yes	Ophiocten gracilis
566	South	75.94	29.966	200	40	April	30.04.2018	Egg fish	NA	NA	gttgagcactgtgggccatagagggggcgctgtggatttgggtatcttctccttacaccttgctggcgttagaagaatcttggggagagctaattttattaccaccatctctaatataaaaggtgaaggcatatctatagaacttatgcctttattcgtgtgggcggtgctcctcacagctatcttacttttgctctctcttcctgtattagctggtgctattactatgttactaacagaccgtaattttaacacctctttctttgaccctgctggtggcggggacccgattttataccaacacctattt	20628	58.29	Sagitta elegans	94.2	BLAST	No	Yes	Sagitta elegans 94.2 %
567	South	75.94	29.966	200	40	April	30.04.2018	Cyphonaute	NA	NA	gctagcaagaaatatttctcatagaggaagatctgttgaccttgcaatcttctcccttcatctggcaggtgcttcttctattctaggagctattaattttataactactattattaacatgcgaagatcgtcaataacttttgctcggatacccctattcatctgatccgtatttattacagctattttactggtcctttccttaccagtcctagcgggtgcaattacaatacttctcacggaccgtaatttaaataccacttttttcgaccctgctgggggaggggatcccatcctataccaacacttattt	11495	97.06	Alcyonidium mamillatum	99.4	BLAST	Yes	Yes	Alcyonidium mamillatum
568	South	75.94	29.966	200	40	April	30.04.2018	Polychaete	NA	NA	cctttctggcaacttagctcacgccggtccctctgttgacctggcaattttctccctccatttagcaggtgtttcctctattttaggtgctttaaactttatcacaactgtgattaacatacgctgagaaggcctccgcctagaaaatatctccctatttgtatgagctgtaacaatcacagccgtccttcttcttctatcactccctgtcttagctggggcgattactatacttctaaccgaccgaaatctaaatacttcattctttgaccccgcaggaggaggagacccaattttatatcagcacttattc	12744	87.27	Spio sp.	99.7	BOLD	Yes	Yes	Spio sp.
569	South	75.94	29.966	200	40	April	30.04.2018	Ophiopluteus large	731	Posterodorsal arm	tttatctgggccagtagcacacgcaggtggttgtgtagacttagcaatattttctttacatttagctggtgcttcttctataatggcttcaataaattttattacaacaataataaatatgcgagctcccggtatgacaatggaccgaactcccttatttgtttgatcaatttttattacaacttttttattattattatcactaccagttttagctggggcaattacaatgcttcttactgaccgtaaaattaaaacttctttctttgaccccacaggagggggagaccctatattatttcaacatttattt	7640	97.71	Ophiocten sericeum	100	BOLD	Yes	Yes	Ophiocten sericeum
570	South	75.94	29.966	200	40	April	30.04.2018	Unknown fleshy ball	NA	NA	ttatcagctggtattgcacatgcaggagcctctgttgatatgggaattttttctttacatattgctggagcttcatctattttgggagcagtaaattttattactactgtaattaacatacgatctgcgggaatgacaatagaccgaattcctttatttgtatgatcagtatttattacagctattttacttttattatctttaccggttctagcaggagctattactatacttttaacagatcgtaatttaaatacctctttttttgaccctgcaggaggaggagaccctattttatatcaacatttattt	15898	99.55	Thysanoessa inermis	100	BOLD	No	Yes	Thysanoessa inermis
571	South	75.94	29.966	200	40	April	30.04.2018	Egg fish	NA	NA	gttgagcactgtgggccatagagggggcgctgtggatttgggtatcttctccttacaccttgctggcgttagaagaatcttggggagagctaattttattaccaccatctctaatataaaaggtgaaggcatatctatagaacttatgcctttattcgtgtgggcggtgctcctcacagctatcttacttttgctctctcttcctgtattagctggtgctattactatgttactaacagaccgtaattttaacacctctttctttgaccctgctggtggcggggacccgattttataccaacacctattt	737	99.32	Sagitta elegans	94.2	BLAST	No	Yes	Sagitta elegans 94.2 %
572	South	75.94	29.966	200	40	April	30.04.2018	Unknown tube	NA	NA	ttatcaggtccggtagctcacgcaggtggttgtgtagatttagcaatattttctttacatttagctggtgcttcttctataatggcctcaataaattttataactacaataattaatatgcgagctcccggtatgacaatggaccgagtccctttatttgtttgatcaatttttattacaacttttttattattattatctttaccagttttagctggtgcaattacaatgttattaactgaccgtaatataaaaacttccttttttgatccaacaggaggaggagacccaatattattccaacacttgttc	9	33.33	Ophiocten gracilis	100	BOLD	Yes	No	Insufficient reads
573	South	75.94	29.966	200	40	April	30.04.2018	Unknown tube	NA	NA	tttgtcaggaattttagctcattctggtggcgctgtcgatttagctatttttagcttacatttggcgggtatttcgtctattttaggagctataaattttattgtaactattttaaacatgcgttgtcctggtatgactgctcatagaacacctttatttgtttgggctgtttttataacagcttttttacttttgttatcacttcctgttttagctggcgctattacaatgttattaacagatagaaattttaatacgtctttctttgatccaaacggtggtggtgatcctgtcttatatcagcatttgttt	197	40.61	Phaeocystis antarctica	91.6	BOLD	No	No	Insufficient reads
574	South	75.94	29.966	200	40	April	30.04.2018	Egg fish	NA	NA	gttgagcactgtgggccatagagggggcgctgtggatttgggtatcttctccttacaccttgctggcgttagaagaatcttggggagagctaattttattaccaccatctctaatataaaaggtgaaggcatatctatagaacttatgcctttattcgtgtgggcggtgctcctcacagctatcttacttttgctctctcttcctgtattagctggtgctattactatgttactaacagaccgtaattttaacacctctttctttgaccctgctggtggcggggacccgattttataccaacacctattt	10693	75.28	Sagitta elegans	94.2	BLAST	No	Yes	Sagitta elegans 94.2 %
575	South	75.94	29.966	200	40	April	30.04.2018	Cyphonaute	NA	NA	gctagcaagaaatatttctcatagaggaagatctgttgaccttgcaatcttctcccttcatctggcaggtgcttcttctattctaggagctattaattttataactactattattaacatgcgaagatcgtcaataacttttgctcggatacccctattcatctgatccgtatttattacagctattttactggtcctttccttaccagtcctagcgggtgcaattacaatacttctcacggaccgtaatttaaataccacttttttcgaccctgctgggggaggggatcccatcctataccaacacttattt	14064	97.46	Alcyonidium mamillatum	99.4	BLAST	Yes	Yes	Alcyonidium mamillatum
577	South	75.94	29.966	200	40	April	30.04.2018	Egg fish	NA	NA	gttgagcactgtgggccatagagggggcgctgtggatttgggtatcttctccttacaccttgctggcgttagaagaatcttggggagagctaattttattaccaccatctctaatataaaaggtgaaggcatatctatagaacttatgcctttattcgtgtgggcggtgctcctcacagctatcttacttttgctctctcttcctgtattagctggtgctattactatgttactaacagaccgtaattttaacacctctttctttgaccctgctggtggcggggacccgattttataccaacacctattt	15581	89.47	Sagitta elegans	94.2	BLAST	No	Yes	Sagitta elegans 94.2 %
578	South	75.94	29.966	200	40	April	30.04.2018	Ophiopluteus small	490	Posterodorsal arm	ttatcaggtccggtagctcacgcaggtggttgtgtagatttagcaatattttctttacatttagctggtgcttcttctataatggcctcaataaattttataactacaataattaatatgcgagctcccggtatgacaatggaccgagtccctttatttgtttgatcaatttttattacaacttttttattattattatctttaccagttttagctggtgcaattacaatgttattaactgaccgtaatataaaaacttccttttttgatccaacaggaggaggagacccaatattattccaacacttgttc	5948	97.56	Ophiocten gracilis	100	BOLD	Yes	Yes	Ophiocten gracilis
579	South	75.94	29.966	200	40	April	30.04.2018	Ophiopluteus large	951	Posterodorsal arm	tttatctgggccagtagcacacgcaggtggttgtgtagacttagcaatattttctttacatttagctggtgcttcttctataatggcttcaataaattttattacaacaataataaatatgcgagctcccggtatgacaatggaccgaactcccttatttgtttgatcaatttttattacaacttttttattattattatcactaccagttttagctggggcaattacaatgcttcttactgaccgtaaaattaaaacttctttctttgaccccacaggagggggagaccctatattatttcaacatttattt	14379	70.68	Ophiocten sericeum	100	BOLD	Yes	Yes	Ophiocten sericeum
580	South	75.94	29.966	200	40	April	30.04.2018	Nudibranch	NA	NA	tttgtcaggaattttagctcattctggtggcgctgtcgatttagctatttttagcttacatttggcgggtatttcgtctattttaggagctataaattttattgtaactattttaaacatgcgttgtcctggtatgactgctcatagaacacctttatttgtttgggctgtttttataacagcttttttacttttgttatcacttcctgttttagctggcgctattacaatgttattaacagatagaaattttaatacgtctttctttgatccaaacggtggtggtgatcctgtcttatatcagcatttgttt	9329	96.41	Phaeocystis antarctica	91.6	BOLD	No	No	Unknown
581	South	75.94	29.966	200	40	April	30.04.2018	Egg fish	NA	NA	gttgagcactgtgggccatagagggggcgctgtggatttgggtatcttctccttacaccttgctggcgttagaagaatcttggggagagctaattttattaccaccatctctaatataaaaggtgaaggcatatctatagaacttatgcctttattcgtgtgggcggtgctcctcacagctatcttacttttgctctctcttcctgtattagctggtgctattactatgttactaacagaccgtaattttaacacctctttctttgaccctgctggtggcggggacccgattttataccaacacctattt	11517	98.33	Sagitta elegans	94.2	BLAST	No	Yes	Sagitta elegans 94.2 %
582	South	75.5	30	45	0	June	02.07.2018	Ophiopluteus 3	2111	Posterodorsal arm	ttatcaggtccggtagctcacgcaggtggttgtgtagatttagcaatattttctttacatttagctggtgcttcttctataatggcctcaataaattttataactacaataattaatatgcgagctcccggtatgacaatggaccgagtccctttatttgtttgatcaatttttattacaacttttttattattattatctttaccagttttagctggtgcaattacaatgttattaactgaccgtaatataaaaacttccttttttgatccaacaggaggaggagacccaatattattccaacacttgttc	5820	95.69	Ophiocten gracilis	100	BOLD	Yes	Yes	Ophiocten gracilis
583	South	75.5	30	45	0	June	02.07.2018	Ophiopluteus 3	1708	Posterodorsal arm	ttatcaggtccggtagctcacgcaggtggttgtgtagatttagcaatattttctttacatttagctggtgcttcttctataatggcctcaataaattttataactacaataattaatatgcgagctcccggtatgacaatggaccgagtccctttatttgtttgatcaatttttattacaacttttttattattattatctttaccagttttagctggtgcaattacaatgttattaactgaccgtaatataaaaacttccttttttgatccaacaggaggaggagacccaatattattccaacacttgttc	11717	94.02	Ophiocten gracilis	100	BOLD	Yes	Yes	Ophiocten gracilis
584	South	75.5	30	45	0	June	02.07.2018	Bivalve	244	Anterior-posterior length	actatctgcttgattaggacatcccgcaccggctatagaatttataattttaggtctacatattgcaggtatgtcttctatttttgcaagaattaattttgtgacaacaggtgctaacatacgtcctgagggggtggcacctcagcgcactactttatttgtagtgtctgtcattattacatcatttttactagtggtggcaatacccgtgttggctgctgggttaactatgcttttaactgatcgaaattttaatacttcttttttcgatcccgtcggaggaggggatcctgtcttatttattcatctcttt	1348	97.03	Macoma calcarea	100	BLAST	Yes	Yes	Macoma calcarea
585	South	75.5	30	45	0	June	02.07.2018	Bivalve	245	Anterior-posterior length	attgtcttcatacccattttctggtgcatctatagattttgtaattttctctattcatgttgctggggcttcttctattgctggagctttaaactttttaactacgggtttaaatatgcgaattaaatcaatagagttaaagcgaatacctttatttgtttgatctattattgtaactgcttttctattggtgttagcaatgcctgttttggcgggagctgttactatgcttattagggaccgtcattttaatacaactttttatgatccagcgggagggggggatcctgtattatttgtgcatctattt	72	76.39	Hiatella sp. K	100	BOLD	Yes	Yes	Hiatella sp. K
586	South	75.5	30	45	0	June	02.07.2018	Bivalve	238	Anterior-posterior length	actatctgcttgattaggacatcccgcaccggctatagaatttataattttaggtctacatattgcaggtatgtcttctatttttgcaagaattaattttgtgacaacaggtgctaacatacgtcctgagggggtggcacctcagcgcactactttatttgtagtgtctgtcattattacatcatttttactagtggtggcaatacccgtgttggctgctgggttaactatgcttttaactgatcgaaattttaatacttcttttttcgatcccgtcggaggaggggatcctgtcttatttattcatctcttt	2544	96.58	Macoma calcarea	100	BLAST	Yes	Yes	Macoma calcarea
587	South	75.5	30	45	0	June	02.07.2018	Bivalve	215	Anterior-posterior length	tctttcaagaaatttaatagggcattctggtgctgcgggagactttttaattttatctcttcatatcggaggtgcttcatctattatagcatccttaaatttttatagaacgtgaggaaatatgcgtgcaggatgtcatcccttccatcgtgtaccccttttttgtagttctattggggtcacaaggtttcttttaattctagctatgcctgtcttagcaggggcattaacaatactgttaacagatcgcaattttaatactgctttttttgatcctaccggtttaggggaccctatattgtttgttcatttattt	402	74.38	Mya truncata	100	BLAST	Yes	Yes	Insufficient reads
588	South	75.5	30	45	0	June	02.07.2018	Bivalve	226	Anterior-posterior length	attgtcttcatacccattttctggtgcatctatagattttgtaattttctctattcatgttgctggggcttcttctattgctggagctttaaactttttaactacgggtttaaatatgcgaattaaatcaatagagttaaagcgaatacctttatttgtttgatctattattgtaactgcttttctattggtgttagcaatgcctgttttggcgggagctgttactatgcttattagggaccgtcattttaatacaactttttatgatccagcgggagggggggatcctgtattatttgtgcatctattt	4365	97.43	Hiatella sp. K	100	BOLD	Yes	Yes	Hiatella sp. K
589	South	75.5	30	45	0	June	02.07.2018	Ophiopluteus 1	774	Posterodorsal arm	tttgtcaggccctaccgcacatgcaggaggctgcgtagacctcgcaattttttctctccacctagcaggtgcatcttcaattatggcctcaataaaatttattacaactattataaatatgcgtaggcccggcatgaccatggatcgacttccgctttttgtttgatctattttcttaacaactatattactactcctttctctgcctgttttagcaggagctattacaatgctactaactgatcgtaacataaaaacaacgttttttgatcctacaggaggaggagacccaatacttttccaacatttattt	4382	98.61	Ophiopholis aculeata	100	BOLD	Yes	Yes	Ophiopholis aculeata
590	South	75.5	30	45	0	June	02.07.2018	Bivalve	237	Anterior-posterior length	actatctgcttgattaggacatcccgcaccggctatagaatttataattttaggtctacatattgcaggtatgtcttctatttttgcaagaattaattttgtgacaacaggtgctaacatacgtcctgagggggtggcacctcagcgcactactttatttgtagtgtctgtcattattacatcatttttactagtggtggcaatacccgtgttggctgctgggttaactatgcttttaactgatcgaaattttaatacttcttttttcgatcccgtcggaggaggggatcctgtcttatttattcatctcttt	4803	99	Macoma calcarea	100	BLAST	Yes	Yes	Macoma calcarea
591	South	75.5	30	45	0	June	02.07.2018	Bivalve	251	Anterior-posterior length	actatctgcttgattaggacatcccgcaccggctatagaatttataattttaggtctacatattgcaggtatgtcttctatttttgcaagaattaattttgtgacaacaggtgctaacatacgtcctgagggggtggcacctcagcgcactactttatttgtagtgtctgtcattattacatcatttttactagtggtggcaatacccgtgttggctgctgggttaactatgcttttaactgatcgaaattttaatacttcttttttcgatcccgtcggaggaggggatcctgtcttatttattcatctcttt	4803	99	Macoma calcarea	100	BLAST	Yes	Yes	Macoma calcarea
592	South	75.5	30	45	0	June	02.07.2018	Bivalve	247	Anterior-posterior length	attgtcttcatacccattttctggtgcatctatagattttgtaattttctctattcatgttgctggggcttcttctattgctggagctttaaactttttaactacgggtttaaatatgcgaattaaatcaatagagttaaagcgaatacctttatttgtttgatctattattgtaactgcttttctattggtgttagcaatgcctgttttggcgggagctgttactatgcttattagggaccgtcattttaatacaactttttatgatccagcgggagggggggatcctgtattatttgtgcatctattt	1901	12.78	Hiatella sp. K	100	BOLD	Yes	Yes	Hiatella sp. K
593	South	75.5	30	45	0	June	02.07.2018	Ophiopluteus 2	1806	Posterodorsal arm	ttatcaggtccggtagctcacgcaggtggttgtgtagatttagcaatattttctttacatttagctggtgcttcttctataatggcctcaataaattttataactacaataattaatatgcgagctcccggtatgacaatggaccgagtccctttatttgtttgatcaatttttattacaacttttttattattattatctttaccagttttagctggtgcaattacaatgttattaactgaccgtaatataaaaacttccttttttgatccaacaggaggaggagacccaatattattccaacacttgttc	1902	85.38	Ophiocten gracilis	100	BOLD	Yes	Yes	Ophiocten gracilis
594	South	75.5	30	45	0	June	02.07.2018	Bivalve	235	Anterior-posterior length	attgtcttcatacccattttctggtgcatctatagattttgtaattttctctattcatgttgctggggcttcttctattgctggagctttaaactttttaactacgggtttaaatatgcgaattaaatcaatagagttaaagcgaatacctttatttgtttgatctattattgtaactgcttttctattggtgttagcaatgcctgttttggcgggagctgttactatgcttattagggaccgtcattttaatacaactttttatgatccagcgggagggggggatcctgtattatttgtgcatctattt	4588	4.49	Hiatella sp. K	100	BOLD	Yes	Yes	Hiatella sp. K
595	South	75.5	30	45	0	June	02.07.2018	Polychaete 2	NA	NA	tctagcctctaacattgcccatgcgggcccttcagttgatctagcaatcttttcgcttcatattgcaggggtctcttcaatcttaggggctctaaattttatcaccactgttttaaatatacggtacaaaggacttcgattagagcgtgtgcctctttttgtttgggctgctaaaattacagctattttattattattaagtctgccggtattggcaggggctattaccatattattaactgatcgaaatttaaacacagcgttttttgaccctgcggggggaggggacccaattctttatcaacatttattt	4590	94.49	Pholoe baltica	100	BOLD	Yes	Yes	Pholoe baltica
596	South	75.5	30	45	0	June	02.07.2018	Bivalve	231	Anterior-posterior length	tctttcttcttatccattttctggggcatctatagattttgtaattttttctattcatgttgcaggtgcctcatctattgctggtgctttaaattttttaactactggacttaatatacgtattaaatctatagaattgaagcgcatgcctttgtttgtttggtcaattattgtgaccgcttttttattggttttagcaatgcctgttttagctggggctgtcactatgttaattagggatcgtcattttaatacaactttttatgatcctgctgggggaggtgatcctgtgctgtttgttcatttattt	331	2.72	Hiatella sp. I	85.3	BOLD	Yes	Yes	Insufficient reads
597	South	75.5	30	45	0	June	02.07.2018	Polychaete 1	NA	NA	tctttcgagaaacctcgctcacgcaggtccctctgtagacttggctattttttctcttcacttagcgggggtttcttccatcctaggggccctaaactttatcactaccatcttaaacatgcgagttgaaggcctgcgcatggaacgcatacccttatttatctgagctgtatttattaccgccatccttttactcctatccctgcctgttttagctgggggaattaccatgctactaactgaccgaaacattaataccactttcttcgaccctgctggagggggggaccccatcttatttcaacacttattt	331	96.68	Prionospio sp.	99.3	BOLD	Yes	Yes	Prionospio sp.
598	South	75.5	30	45	0	June	02.07.2018	Ophiopluteus 3	2190	Posterodorsal arm	ttatcaggtccggtagctcacgcaggtggttgtgtagatttagcaatattttctttacatttagctggtgcttcttctataatggcctcaataaattttataactacaataattaatatgcgagctcccggtatgacaatggaccgagtccctttatttgtttgatcaatttttattacaacttttttattattattatctttaccagttttagctggtgcaattacaatgttattaactgaccgtaatataaaaacttccttttttgatccaacaggaggaggagacccaatattattccaacacttgttc	5064	93.03	Ophiocten gracilis	100	BOLD	Yes	Yes	Ophiocten gracilis
599	South	75.5	30	45	0	June	02.07.2018	Bivalve	214	Anterior-posterior length	attgtcttcatacccattttctggtgcatctatagattttgtaattttctctattcatgttgctggggcttcttctattgctggagctttaaactttttaactacgggtttaaatatgcgaattaaatcaatagagttaaagcgaatacctttatttgtttgatctattattgtaactgcttttctattggtgttagcaatgcctgttttggcgggagctgttactatgcttattagggaccgtcattttaatacaactttttatgatccagcgggagggggggatcctgtattatttgtgcatctattt	5063	6.36	Hiatella sp. K	100	BOLD	Yes	Yes	Hiatella sp. K
600	South	75.5	30	45	0	June	02.07.2018	Polychaete 2	NA	NA	tctagcctctaacattgcccatgcgggcccttcagttgatctagcaatcttttcgcttcatattgcaggggtctcttcaatcttaggggctctaaattttatcaccactgttttaaatatacggtacaaaggacttcgattagagcgtgtgcctctttttgtttgggctgctaaaattacagctattttattattattaagtctgccggtattggcaggggctattaccatattattaactgatcgaaatttaaacacagcgttttttgaccctgcggggggaggggacccaattctttatcaacatttattt	3315	80.15	Pholoe baltica	100	BOLD	Yes	Yes	Pholoe baltica
601	South	75.5	30	45	0	June	02.07.2018	Bivalve	261	Anterior-posterior length	attgtcttcatacccattttctggtgcatctatagattttgtaattttctctattcatgttgctggggcttcttctattgctggagctttaaactttttaactacgggtttaaatatgcgaattaaatcaatagagttaaagcgaatacctttatttgtttgatctattattgtaactgcttttctattggtgttagcaatgcctgttttggcgggagctgttactatgcttattagggaccgtcattttaatacaactttttatgatccagcgggagggggggatcctgtattatttgtgcatctattt	3315	18.4	Hiatella sp. K	100	BOLD	Yes	Yes	Hiatella sp. K
602	South	75.5	30	45	0	June	02.07.2018	Bivalve	298	Anterior-posterior length	gttaacatcaattgaatttttaagggacccttcaatagatatagctattttttcactacatcttggcggtgtttcttctattgcggcgagtttaaatttcgcgaggacatgtgttaatatgcggcaagagggccggggcctacataaaattcctatatttccaatttccctggggatcactgctttacttttaattatcgctatgccggtgttggcgggggccctaactatactattattggatcgaaattttgcaactaggttttttgatccggtgggagggggtgatccaattttgtttatacatctattt	3790	62.16	Ciliatocardium ciliatum	100	BLAST	Yes	Yes	Ciliatocardium ciliatum
603	South	75.5	30	45	0	June	02.07.2018	Bivalve	241	Anterior-posterior length	attgtcttcatacccattttctggtgcatctatagattttgtaattttctctattcatgttgctggggcttcttctattgctggagctttaaactttttaactacgggtttaaatatgcgaattaaatcaatagagttaaagcgaatacctttatttgtttgatctattattgtaactgcttttctattggtgttagcaatgcctgttttggcgggagctgttactatgcttattagggaccgtcattttaatacaactttttatgatccagcgggagggggggatcctgtattatttgtgcatctattt	3790	36.97	Hiatella sp. K	100	BOLD	Yes	Yes	Hiatella sp. K
604	South	75.5	30	45	0	June	02.07.2018	Bivalve	254	Anterior-posterior length	gttaacatcaattgaatttttaagggacccttcaatagatatagctattttttcactacatcttggcggtgtttcttctattgcggcgagtttaaatttcgcgaggacatgtgttaatatgcggcaagagggccggggcctacataaaattcctatatttccaatttccctggggatcactgctttacttttaattatcgctatgccggtgttggcgggggccctaactatactattattggatcgaaattttgcaactaggttttttgatccggtgggagggggtgatccaattttgtttatacatctattt	5244	33.16	Ciliatocardium ciliatum	100	BLAST	Yes	Yes	Ciliatocardium ciliatum
605	South	75.5	30	45	0	June	02.07.2018	Bivalve	234	Anterior-posterior length	attgtcttcatacccattttctggtgcatctatagattttgtaattttctctattcatgttgctggggcttcttctattgctggagctttaaactttttaactacgggtttaaatatgcgaattaaatcaatagagttaaagcgaatacctttatttgtttgatctattattgtaactgcttttctattggtgttagcaatgcctgttttggcgggagctgttactatgcttattagggaccgtcattttaatacaactttttatgatccagcgggagggggggatcctgtattatttgtgcatctattt	5245	64.9	Hiatella sp. K	100	BOLD	Yes	Yes	Hiatella sp. K
606	South	75.5	30	45	0	June	02.07.2018	Bivalve	288	Anterior-posterior length	attgtcttcatacccattttctggtgcatctatagattttgtaattttctctattcatgttgctggggcttcttctattgctggagctttaaactttttaactacgggtttaaatatgcgaattaaatcaatagagttaaagcgaatacctttatttgtttgatctattattgtaactgcttttctattggtgttagcaatgcctgttttggcgggagctgttactatgcttattagggaccgtcattttaatacaactttttatgatccagcgggagggggggatcctgtattatttgtgcatctattt	6344	98.94	Hiatella sp. K	100	BOLD	Yes	Yes	Hiatella sp. K
607	South	75.5	30	45	0	June	02.07.2018	Bivalve	223	Anterior-posterior length	attgtcttcatacccattttctggtgcatctatagattttgtaattttctctattcatgttgctggggcttcttctattgctggagctttaaactttttaactacgggtttaaatatgcgaattaaatcaatagagttaaagcgaatacctttatttgtttgatctattattgtaactgcttttctattggtgttagcaatgcctgttttggcgggagctgttactatgcttattagggaccgtcattttaatacaactttttatgatccagcgggagggggggatcctgtattatttgtgcatctattt	2400	99.17	Hiatella sp. K	100	BOLD	Yes	Yes	Hiatella sp. K
608	South	75.5	30	45	0	June	02.07.2018	Ophiopluteus 4	1755	Posterodorsal arm	ttatcaggtccggtagctcacgcaggtggttgtgtagatttagcaatattttctttacatttagctggtgcttcttctataatggcctcaataaattttataactacaataattaatatgcgagctcccggtatgacaatggaccgagtccctttatttgtttgatcaatttttattacaacttttttattattattatctttaccagttttagctggtgcaattacaatgttattaactgaccgtaatataaaaacttccttttttgatccaacaggaggaggagacccaatattattccaacacttgttc	5818	98.57	Ophiocten gracilis	100	BOLD	Yes	Yes	Ophiocten gracilis
609	South	75.5	30	45	0	June	02.07.2018	Bivalve	322	Anterior-posterior length	attgtcttcatacccattttctggtgcatctatagattttgtaattttctctattcatgttgctggggcttcttctattgctggagctttaaactttttaactacgggtttaaatatgcgaattaaatcaatagagttaaagcgaatacctttatttgtttgatctattattgtaactgcttttctattggtgttagcaatgcctgttttggcgggagctgttactatgcttattagggaccgtcattttaatacaactttttatgatccagcgggagggggggatcctgtattatttgtgcatctattt	7277	94.6	Hiatella sp. K	100	BOLD	Yes	Yes	Hiatella sp. K
610	South	75.5	30	45	0	June	02.07.2018	Bivalve	258	Anterior-posterior length	actatctgcttgattaggacatcccgcaccggctatagaatttataattttaggtctacatattgcaggtatgtcttctatttttgcaagaattaattttgtgacaacaggtgctaacatacgtcctgagggggtggcacctcagcgcactactttatttgtagtgtctgtcattattacatcatttttactagtggtggcaatacccgtgttggctgctgggttaactatgcttttaactgatcgaaattttaatacttcttttttcgatcccgtcggaggaggggatcctgtcttatttattcatctcttt	3792	98.76	Macoma calcarea	100	BLAST	Yes	Yes	Macoma calcarea
611	South	75.5	30	45	0	June	02.07.2018	Bivalve	274	Anterior-posterior length	gttaacatcaattgaatttttaagggacccttcaatagatatagctattttttcactacatcttggcggtgtttcttctattgcggcgagtttaaatttcgcgaggacatgtgttaatatgcggcaagagggccggggcctacataaaattcctatatttccaatttccctggggatcactgctttacttttaattatcgctatgccggtgttggcgggggccctaactatactattattggatcgaaattttgcaactaggttttttgatccggtgggagggggtgatccaattttgtttatacatctattt	7943	98.3	Ciliatocardium ciliatum	100	BLAST	Yes	Yes	Ciliatocardium ciliatum
612	South	75.5	30	45	0	June	02.07.2018	Bivalve	235	Anterior-posterior length	attgtcttcatacccattttctggtgcatctatagattttgtaattttctctattcatgttgctggggcttcttctattgctggagctttaaactttttaactacgggtttaaatatgcgaattaaatcaatagagttaaagcgaatacctttatttgtttgatctattattgtaactgcttttctattggtgttagcaatgcctgttttggcgggagctgttactatgcttattagggaccgtcattttaatacaactttttatgatccagcgggagggggggatcctgtattatttgtgcatctattt	936	99.57	Hiatella sp. K	100	BOLD	Yes	Yes	Hiatella sp. K
613	South	75.5	30	45	0	June	02.07.2018	Bivalve	278	Anterior-posterior length	attgtcttcatacccattttctggtgcatctatagattttgtaattttctctattcatgttgctggggcttcttctattgctggagctttaaactttttaactacgggtttaaatatgcgaattaaatcaatagagttaaagcgaatacctttatttgtttgatctattattgtaactgcttttctattggtgttagcaatgcctgttttggcgggagctgttactatgcttattagggaccgtcattttaatacaactttttatgatccagcgggagggggggatcctgtattatttgtgcatctattt	5946	98.27	Hiatella sp. K	100	BOLD	Yes	Yes	Hiatella sp. K
614	South	75.5	30	45	0	June	02.07.2018	Ophiopluteus 1	727	Posterodorsal arm	tttgtcaggccctaccgcacatgcaggaggctgcgtagacctcgcaattttttctctccacctagcaggtgcatcttcaattatggcctcaataaaatttattacaactattataaatatgcgtaggcccggcatgaccatggatcgacttccgctttttgtttgatctattttcttaacaactatattactactcctttctctgcctgttttagcaggagctattacaatgctactaactgatcgtaacataaaaacaacgttttttgatcctacaggaggaggagacccaatacttttccaacatttattt	6351	99.29	Ophiopholis aculeata	100	BOLD	Yes	Yes	Ophiopholis aculeata
615	South	75.5	30	45	0	June	02.07.2018	Bivalve	169	Anterior-posterior length	tctttcttcttatccattttctggggcatctatagattttgtaattttttctattcatgttgcaggtgcctcatctattgctggtgctttaaattttttaactactggacttaatatacgtattaaatctatagaattgaagcgcatgcctttgtttgtttggtcaattattgtgaccgcttttttattggttttagcaatgcctgttttagctggggctgtcactatgttaattagggatcgtcattttaatacaactttttatgatcctgctgggggaggtgatcctgtgctgtttgttcatttattt	1573	97.14	Hiatella sp. I	85.3	BOLD	Yes	Yes	Hiatella sp. I 85.3 %
616	South	75.5	30	45	0	June	02.07.2018	Bivalve	299	Anterior-posterior length	attgtcttcatacccattttctggtgcatctatagattttgtaattttctctattcatgttgctggggcttcttctattgctggagctttaaactttttaactacgggtttaaatatgcgaattaaatcaatagagttaaagcgaatacctttatttgtttgatctattattgtaactgcttttctattggtgttagcaatgcctgttttggcgggagctgttactatgcttattagggaccgtcattttaatacaactttttatgatccagcgggagggggggatcctgtattatttgtgcatctattt	6924	99.51	Hiatella sp. K	100	BOLD	Yes	Yes	Hiatella sp. K
617	South	75.5	30	45	0	June	02.07.2018	Bivalve	227	Anterior-posterior length	actatctgcttgattaggacatcccgcaccggctatagaatttataattttaggtctacatattgcaggtatgtcttctatttttgcaagaattaattttgtgacaacaggtgctaacatacgtcctgagggggtggcacctcagcgcactactttatttgtagtgtctgtcattattacatcatttttactagtggtggcaatacccgtgttggctgctgggttaactatgcttttaactgatcgaaattttaatacttcttttttcgatcccgtcggaggaggggatcctgtcttatttattcatctcttt	1736	99.19	Macoma calcarea	100	BLAST	Yes	Yes	Macoma calcarea
618	South	75.5	30	45	0	June	02.07.2018	Synchaeta	NA	NA	tctttctgattctaaatttcattctggtatttcagtagatttagctatttttagacttcatttagctgggatttcttctattttaggaagaattaattttataactacaattatttgttctcgtacaacaaagatagttagaatagatcgtataccattgatgatttgatctttaggggtaacagccttcttattagtgactactctacctgtactagctggtgcaattacaatgctacttacagatcgtaattttaacacttcattttttgacccttcaggtggtggaaatcctgtattataccaacatttattt	855	81.52	Synchaeta sp. WM-2017a	87.1	BOLD	No	Yes	Synchaeta sp. WM-2017a 87.1 %
619	South	75.5	30	45	0	June	02.07.2018	Ophiopluteus 3	2564	Posterodorsal arm	ttatcaggtccggtagctcacgcaggtggttgtgtagatttagcaatattttctttacatttagctggtgcttcttctataatggcctcaataaattttataactacaataattaatatgcgagctcccggtatgacaatggaccgagtccctttatttgtttgatcaatttttattacaacttttttattattattatctttaccagttttagctggtgcaattacaatgttattaactgaccgtaatataaaaacttccttttttgatccaacaggaggaggagacccaatattattccaacacttgttc	7374	99.23	Ophiocten gracilis	100	BOLD	Yes	Yes	Ophiocten gracilis
620	South	75.5	30	45	0	June	02.07.2018	Ophiopluteus 1	883	Posterodorsal arm	attatccggaccagttgctcacgccggtggctgtgttgatttagctatattttccctccacttagctggtgcttcgtcaataatggcatcaattaactttattactacaattattaatatgcgagcgccaggtatgacaatggatcgaacccctttatttgtttgatcgattctaattacaacatttcttttattactctcattacctgttctagccggagccattaccatgttattaacagaccggaaaattaaaacatctttcttcgacccaacgggaggaggggaccctattttgttccaacacctattt	5673	90.97	Ophiura sarsii	100	BOLD	Yes	Yes	Ophiura sarsii
621	South	75.5	30	45	0	June	02.07.2018	Mitraria	NA	NA	actctctggtaatgtctctcatgccggggggtctgtagatttagctattttttctttacacttagcaggtgcatcttcgattttaggtgctgttaatttcatgtgcacagtaataaatatacgatctgatgatgctgaatttgaacaaacacctttatttgtggtggctatttacttaacagtattacttctgcttttatctctacctgtactagcaggggggatcactatattgttaacagatcgaaattttaatactagattttttgacccagcaggtgggggtgacccagtgctttttgctcatttgttt	5670	3.51	Galathowenia oculata	100	BOLD	Yes	Yes	Galathowenia oculata
622	South	75.5	30	45	0	June	02.07.2018	Polychaete 2	NA	NA	tctagcctctaacattgcccatgcgggcccttcagttgatctagcaatcttttcgcttcatattgcaggggtctcttcaatcttaggggctctaaattttatcaccactgttttaaatatacggtacaaaggacttcgattagagcgtgtgcctctttttgtttgggctgctaaaattacagctattttattattattaagtctgccggtattggcaggggctattaccatattattaactgatcgaaatttaaacacagcgttttttgaccctgcggggggaggggacccaattctttatcaacatttattt	12585	52.3	Pholoe baltica	100	BOLD	Yes	Yes	Pholoe baltica
623	South	75.5	30	45	0	June	02.07.2018	Ophiopluteus 1	899	Posterodorsal arm	tttgtcaggccctaccgcacatgcaggaggctgcgtagacctcgcaattttttctctccacctagcaggtgcatcttcaattatggcctcaataaaatttattacaactattataaatatgcgtaggcccggcatgaccatggatcgacttccgctttttgtttgatctattttcttaacaactatattactactcctttctctgcctgttttagcaggagctattacaatgctactaactgatcgtaacataaaaacaacgttttttgatcctacaggaggaggagacccaatacttttccaacatttattt	12586	47.18	Ophiopholis aculeata	100	BOLD	Yes	Yes	Ophiopholis aculeata
624	South	75.5	30	45	0	June	02.07.2018	Polychaete 1	NA	NA	tctttcgagaaacctcgctcacgcaggtccctctgtagacttggctattttttctcttcacttagcgggggtttcttccatcctaggggccctaaactttatcactaccatcttaaacatgcgagttgaaggcctgcgcatggaacgcatacccttatttatctgagctgtatttattaccgccatccttttactcctatccctgcctgttttagctgggggaattaccatgctactaactgaccgaaacattaataccactttcttcgaccctgctggagggggggaccccatcttatttcaacacttattt	5450	97.96	Prionospio sp.	99.3	BOLD	Yes	Yes	Prionospio sp.
625	South	75.5	30	45	0	June	02.07.2018	Polychaete 1	NA	NA	tctttcgagaaacctcgctcacgcaggtccctctgtagacttggctattttttctcttcacttagcgggggtttcttccatcctaggggccctaaactttatcactaccatcttaaacatgcgagttgaaggcctgcgcatggaacgcatacccttatttatctgagctgtatttattaccgccatccttttactcctatccctgcctgttttagctgggggaattaccatgctactaactgaccgaaacattaataccactttcttcgaccctgctggagggggggaccccatcttatttcaacacttattt	6518	99.69	Prionospio sp.	99.3	BOLD	Yes	Yes	Prionospio sp.
626	South	75.5	30	45	0	June	02.07.2018	Pectinaria large	NA	NA	tttatcaagaaatgtttctcacgcaggtccttctgtagatttggccattttttctttacacttggcaggagtttcttctattttagcctcaattaattttattaccacggctataaatatacgttcatcaggtttacgtcttgagcgtgtccccttgtttgtgtgatctgtaggtatcacggctttattacttcttctttctctccctgtattggcgggagcaattacaatgcttcttacagaccgaaatttaaatacttctttttttgatcccgcaggaggaggggaccctattttgtatcagcacttgttt	4904	98.35	Eteone sp. CMC09	100	BOLD	Yes	Yes	Eteone sp. CMC09
627	South	75.5	30	45	0	June	02.07.2018	Ophiopluteus 2	1548	Posterodorsal arm	ttatcaggtccggtagctcacgcaggtggttgtgtagatttagcaatattttctttacatttagctggtgcttcttctataatggcctcaataaattttataactacaataattaatatgcgagctcccggtatgacaatggaccgagtccctttatttgtttgatcaatttttattacaacttttttattattattatctttaccagttttagctggtgcaattacaatgttattaactgaccgtaatataaaaacttccttttttgatccaacaggaggaggagacccaatattattccaacacttgttc	5336	96.31	Ophiocten gracilis	100	BOLD	Yes	Yes	Ophiocten gracilis
628	South	75.5	30	45	0	June	02.07.2018	Unknown ball	NA	NA	attaagcagtatttctggtcacccgggagccgcagttgatatggctatttttagcatacacttagccggcatgtcttctatccttggatcaatcaacatgattgttactattcttaatatgcgtgcacctggaatgggtctatttaaaatgccgctatttgtttggtctattttatttacagcatttctactaattttagcgcttcctgttcttgctggtgctattactatgctactaacagatcgtaattttggtacaaatttcttctcaccagaaggtggtggagatccaattttattccagcatttattc	135	50.37	Leucothoidae	83.5	BOLD	Ambiguous	Yes	Insufficient reads
629	South	75.5	30	45	0	June	02.07.2018	Mitraria	NA	NA	actctctggtaatgtctctcatgccggggggtctgtagatttagctattttttctttacacttagcaggtgcatcttcgattttaggtgctgttaatttcatgtgcacagtaataaatatacgatctgatgatgctgaatttgaacaaacacctttatttgtggtggctatttacttaacagtattacttctgcttttatctctacctgtactagcaggggggatcactatattgttaacagatcgaaattttaatactagattttttgacccagcaggtgggggtgacccagtgctttttgctcatttgttt	6828	99.17	Galathowenia oculata	100	BOLD	Yes	Yes	Galathowenia oculata
630	South	75.5	30	45	0	June	02.07.2018	Unknown blob	NA	NA	tctatcaagtggtggatctcattctggtggcgctgttgatttagcgatttttagtttacatttgtcgggagcttcttcaattttaggagctattaattttattacaacaatttttaatatgcgagtaaaaagtttatattttcataatttacctttattcgtatggtcagttttaattacagcttttttattgcttttatctttacctgttttagctggggcaattaccatgcttttaactgatcgaaatttcaatactacctttttcgatcctgctggtggtggtgatcctgtattgtatcaacatttattt	595	57.65	Attheya longicornis	98.4	BLAST	No	No	Insufficient reads
631	South	75.5	30	45	0	June	02.07.2018	Synchaeta	NA	NA	tctttctgattctaaatttcattctggtatttcagtagatttagctatttttagacttcatttagctgggatttcttctattttaggaagaattaattttataactacaattatttgttctcgtacaacaaagatagttagaatagatcgtataccattgatgatttgatctttaggggtaacagccttcttattagtgactactctacctgtactagctggtgcaattacaatgctacttacagatcgtaattttaacacttcattttttgacccttcaggtggtggaaatcctgtattataccaacatttattt	3703	98.41	Synchaeta sp. WM-2017a	87.1	BOLD	No	Yes	Synchaeta sp. WM-2017a 87.1 %
632	South	75.5	30	45	0	June	02.07.2018	Polychaete 1	NA	NA	tctttcgagaaacctcgctcacgcaggtccctctgtagacttggctattttttctcttcacttagcgggggtttcttccatcctaggggccctaaactttatcactaccatcttaaacatgcgagttgaaggcctgcgcatggaacgcatacccttatttatctgagctgtatttattaccgccatccttttactcctatccctgcctgttttagctgggggaattaccatgctactaactgaccgaaacattaataccactttcttcgaccctgctggagggggggaccccatcttatttcaacacttattt	6738	98.14	Prionospio sp.	99.3	BOLD	Yes	Yes	Prionospio sp.
633	South	75.5	30	45	0	June	02.07.2018	Limacina	NA	NA	attaagtaatataggtcacataactcaaagagtagatttttgtattttttcattacatttagcaggtttatcatcaattattggggcaatcaacataattacaacaattatagtaagacgttcaaaaataataacactatctcgaataagattatatttatgaagaatattaattactttaattttattattactatccttacctgtacttgcaggtgctatcacaatactattactagatcgtaattttaacactacattttttgatcctgtaggaggaggtgatccaatcttatttcaacatctattt	14	71.43	Limacina helicina	100	BOLD	No	Yes	Insufficient reads
634	South	75.5	30	45	0	June	02.07.2018	Pluteus	817	Posterodorsal arm	tctctctagtaaaatagcacacgccggaggatccgttgatttagcgatcttctccctccaccttgccggtgcctcttctatcttagcctcaattaaatttataacaacaattattaatatgcggacaccaggaatgtcttttgatcgtcttcctttatttgtctgatccgtctttgttaccgcattcttactactcctttccctcccagtcttagctggagcaattacaatgcttcttacagaccgtaaaataaacacaactttcttcgatccagcagggggaggtgacccaattctattccaacacttattc	4122	96.46	Strongylocentrotus pallidus	100	BOLD	Yes	Yes	Strongylocentrotus pallidus
635	South	75.558	29.32	200	0	January	12.01.2018	Egg	NA	NA	actagcaggactacaaagtcattcaggaggatcaattgatctagctatctttagtcttcacctatcaggtatctcatctatgctaggtgctatgaacttcatggtaactatcctaaatatgcgagcctcaggtatgacaatgtacaaaatgccactatttgtatgggcagtatttgtaacatcaattctacttattactacactacctgtactagcaggtgctattacaatgctactaactgaccgtaactttaacacatcattctatgatccagcaggaggtggtgatccagtactatatcaacatctattc	22	31.82	Basidiomycota	100	BOLD	No	Yes	Insufficient reads
636	South	75.558	29.32	200	0	January	12.01.2018	Egg	NA	NA	tttgtcaggccctaccgcacatgcaggaggctgcgtagacctcgcaattttttctctccacctagcaggtgcatcttcaattatggcctcaataaaatttattacaactattataaatatgcgtaggcccggcatgaccatggatcgacttccgctttttgtttgatctattttcttaacaactatattactactcctttctctgcctgttttagcaggagctattacaatgctactaactgatcgtaacataaaaacaacgttttttgatcctacaggaggaggagacccaatacttttccaacatttattt	22	77.27	Ophiopholis aculeata	100	BOLD	Yes	No	Unknown
637	South	75.558	29.32	200	0	January	12.01.2018	Cyphonaute	NA	NA	gctagcaagaaatatttctcatagaggaagatctgttgaccttgcaatcttctcccttcatctggcaggtgcttcttctattctaggagctattaattttataactactattattaacatgcgaagatcgtcaataacttttgctcggatacccctattcatctgatccgtatttattacagctattttactggtcctttccttaccagtcctagcgggtgcaattacaatacttctcacggaccgtaatttaaataccacttttttcgaccctgctgggggaggggatcccatcctataccaacacttattt	10290	99.7	Alcyonidium mamillatum	99.4	BLAST	Yes	Yes	Alcyonidium mamillatum
638	South	75.558	29.32	200	0	January	12.01.2018	Egg cluster	NA	NA	tcttagatcttttttatttcacggaggggcttctgtagacttcactatttttaggcttcaccttgctggcgtttcttctttactgggagcagtgaattttattaccactattcttaacttacgaacattaggtatattaatagatcggatacctttgtttccttgagcagtttttatcacagctattttactgctgctctcacttccagttttagctggagcaattactatacttttaaccgatcgaaatcttaatacatccttttatgaccctataggaggtggagacccagttttataccaacatctattt	257	97.67	Oithona atlantica	100	BOLD	No	Yes	Oithona atlantica
639	South	75.558	29.32	200	0	January	12.01.2018	Polychaeta	NA	NA	attatctggacctcaagcacattctggaggatcagtagatttagctattttcagtttacacactgcaggagcttcatctataatgggagctattaactttataactactatttttaatatgagagcacctggaatgactatggataaattaccattgtttgtttgatcagtattaataacagcattcttattattgttatctttacctgtactagcaggagctataacaatgctattaacagatagaaactttaatacaagtttctttgacccagcaggtggaggagatcctattctttatcaacatttattt	19307	99.22	Nanomia cara	100	BOLD	No	No	Unknown
640	South	75.558	29.32	200	0	January	12.01.2018	Cyphonaute	NA	NA	ttagcaagaaatatttctcatagaggaaggtcagttgacttagcaattttttcccttcatttagctggtgcatcttcaattcttggggctattaactttataacaactattatcaatatgcgaaggtcttccatatctttcgctcggctacctctgttcatttgatccgtatttatcactgcgattttgctagtcctctctctgccagtattagccggtgctatcacaatacttctaacagatcggaatttaaacaccacattttttgaccctgccggagggggggaccctattttataccaacatttattt	6559	99.74	Alcyonidium	82.8	BOLD	Yes	Yes	Alcyonidium 82.8 %
641	South	75.558	29.32	200	0	January	12.01.2018	Nothria	NA	NA	cttagcaagaaatattgcccacgcgggcccctctgtagatatggctattttctcccttcaccttgcggggatttcctctatccttggggccattaattttattactacagttattaacatacgatgaagaggattacgactagaacgaatccccctattcgtgtgaggagtagttattactactattctcctacttctatcgctcccggttcttgcgggggccatcactatattacttacagatcgcaacttaaatactgcattctttgaccctgcaggggggggcgatccaattttataccaacatctcttc	5082	99.88	Nothria conchylega CMC02	99	BOLD	Yes	Yes	Nothria conchylega CMC02
642	South	75.558	29.32	200	0	January	12.01.2018	Cyphonaute	NA	NA	gctagcaagaaatatttctcatagaggaagatctgttgaccttgcaatcttctcccttcatctggcaggtgcttcttctattctaggagctattaattttataactactattattaacatgcgaagatcgtcaataacttttgctcggatacccctattcatctgatccgtatttattacagctattttactggtcctttccttaccagtcctagcgggtgcaattacaatacttctcacggaccgtaatttaaataccacttttttcgaccctgctgggggaggggatcccatcctataccaacacttattt	11586	99.59	Alcyonidium mamillatum	99.4	BLAST	Yes	Yes	Alcyonidium mamillatum
643	South	75.558	29.32	200	0	January	12.01.2018	Nudibranch 1	NA	NA	tctttcgggggctattggacatggaggctgttctgttgatttggctattttttctttacatttggcaggtatatcttctcttctaggtgcaattaattttattactactatttttaatatgcggtctccagcaatgactttggatcgtctaagattgtttgtatggtctgtcttggtcactgctttcttgcttttgctttccttacctgttttggccggagcaattactatgttgttaactgaccgtaattttaatactagattttttgacccggctggtggtggagatcctattttgtaccaacatttattt	7217	98.48	Dendronotus patricki	100	BLAST	Yes	Yes	Dendronotus patricki
644	South	75.558	29.32	200	0	January	12.01.2018	Foram	NA	NA	tttagccggaaacctcgctcatgctggagcatctgttgatctcactatcttttctcttcatctagcaggtatttcatcaattcttggggcaattaattttattaccacaattattaatatgaaacctccagcaatttcacagtaccaaacacccctctttgtttgagcggtgctaattacagctgtactcctactattatctcttcccgtcttagcagctggtatcacaatacttctaactgaccgtaatcttaacacttctttctttgaccctgctggaggaggtgaccccattttataccaacacctattc	311	67.85	Boreogadus saida	100	BOLD	No	No	Insufficient reads
645	South	75.558	29.32	200	0	January	12.01.2018	Nudibranch 1	NA	NA	tctttccggtgctattgggcatgggggttgttctgtggatttagctatcttttctttacatctagcaggtatgtcctctcttcttggtgcaattaattttattactactatttttaatatgcggtctccagcgatgactttagatcggcttaggttatttgtctgatctgttcttgtcactgcttttttgttgctactttctttacctgttttagctggggctattactatgctgcttacagatcggaatttcaacactaggttttttgatccagccggtggaggggacccaattttgtaccagcatttattc	1972	78.9	Dendronotus frondosus	100	BOLD	Yes	Yes	Dendronotus frondosus
646	South	75.558	29.32	200	0	January	12.01.2018	Nudibranch 1	NA	NA	tctttcgggggctattggacatggaggctgttctgttgatttggctattttttctttacatttggcaggtatatcttctcttctaggtgcaattaattttattactactatttttaatatgcggtctccagcaatgactttggatcgtctaagattgtttgtatggtctgtcttggtcactgctttcttgcttttgctttccttacctgttttggccggagcaattactatgttgttaactgaccgtaattttaatactagattttttgacccggctggtggtggagatcctattttgtaccaacatttattt	1904	99.11	Dendronotus patricki	100	BLAST	Yes	Yes	Dendronotus patricki
647	South	75.558	29.32	200	0	January	12.01.2018	Unknown ball	NA	NA	actaagtacaacactaatgagtttatcatctgtaggagttaatttaatcatatatggtttattattcaatggtatatcttcaagtttaacatcaattaatatctttggtactatccagaatatgaaatgatttggacttacattatcacaactacaagtgtatgtttgatcacttgaaattatatcttctatgttactctttgtactaccagttttagtaggagctcttgttatgttacttttagatcttcattataatacagtcttctatgatacaatatttggaggtgatgttgtgttctatcagcatctattt	4025	79.06	No match	0	No match	No match	No	Unknown
648	South	75.558	29.32	200	0	January	12.01.2018	Nauplius	NA	NA	tctttcaagaaatattgcacacgcagggggctcagtagattttgctattttttctctacatttggccggggtgagatcaattttaggggcagttaattttattaggactttaggaaacctgcgagtctttggtatattactggaccggataccattattcgcatggtctgtcttagtcactgcggtgctgctattgctctctatgccagtactcgctggcgcgattactatgcttctaacagaccgaaatttaaacacgtcgttttatgatgtgggagggggtggagaccctatcttataccaacatcttttt	37	54.05	Microcalanus pusillus	100	BOLD	No	Yes	Insufficient reads
649	South	75.558	29.32	200	0	January	12.01.2018	Unknown piece 1	NA	NA	tttatcttctttaattggatcacctacaatttctgttgattttttgatttttgctttgcatctagctggctttagttctatactagccagtattaatttttttatttctattgtatgtttaataaatttaaatgaattttttagattaaatttatttttatttggtaacctagtagtagcttttttattattcatatcgcttccagtattagctggagccataactctattattatttgatcgaaattttaatactgtcttttatgatttaaataacggaggtgatgttgttttatttcaacatttattc	7581	99.55	No match	0	No match	No match	No	Unknown
650	South	75.558	29.32	200	0	January	12.01.2018	Egg	NA	NA	attatccggaccagttgctcacgccggtggctgtgttgatttagctatattttccctccacttagctggtgcttcgtcaataatggcatcaattaactttattactacaattattaatatgcgagcgccaggtatgacaatggatcgaacccctttatttgtttgatcgattctaattacaacatttcttttattactctcattacctgttctagccggagccattaccatgttattaacagaccggaaaattaaaacatctttcttcgacccaacgggaggaggggaccctattttgttccaacacctattt	22	81.82	Ophiura sarsii	100	BOLD	Yes	No	Unknown
651	South	75.558	29.32	200	0	January	12.01.2018	Egg	NA	NA	tttgtcaggccctaccgcacatgcaggaggctgcgtagacctcgcaattttttctctccacctagcaggtgcatcttcaattatggcctcaataaaatttattacaactattataaatatgcgtaggcccggcatgaccatggatcgacttccgctttttgtttgatctattttcttaacaactatattactactcctttctctgcctgttttagcaggagctattacaatgctactaactgatcgtaacataaaaacaacgttttttgatcctacaggaggaggagacccaatacttttccaacatttattt	24	91.67	Ophiopholis aculeata	100	BOLD	Yes	No	Unknown
652	South	75.558	29.32	200	0	January	12.01.2018	Nudibranch 1	NA	NA	tctttcgggggctattggacatggaggctgttctgttgatttggctattttttctttacatttggcaggtatatcttctcttctaggtgcaattaattttattactactatttttaatatgcggtctccagcaatgactttggatcgtctaagattgtttgtatggtctgtcttggtcactgctttcttgcttttgctttccttacctgttttggccggagcaattactatgttgttaactgaccgtaattttaatactagattttttgacccggctggtggtggagatcctattttgtaccaacatttattt	4457	98.65	Dendronotus patricki	100	BLAST	Yes	Yes	Dendronotus patricki
653	South	75.558	29.32	200	0	January	12.01.2018	Egg	NA	NA	attgtcttcatacccattttctggtgcatctatagattttgtaattttctctattcatgttgctggggcttcttctattgctggagctttaaactttttaactacgggtttaaatatgcgaattaaatcaatagagttaaagcgaatacctttatttgtttgatctattattgtaactgcttttctattggtgttagcaatgcctgttttggcgggagctgttactatgcttattagggaccgtcattttaatacaactttttatgatccagcgggagggggggatcctgtattatttgtgcatctattt	44	36.36	Hiatella sp. K	100	BOLD	Yes	No	Insufficient reads
654	South	75.558	29.32	200	0	January	12.01.2018	Unknown disk	NA	NA	attatctggacctcaagcacattctggaggatcagtagatttagctattttcagtttacacactgcaggagcttcatctataatgggagctattaactttataactactatttttaatatgagagcacctggaatgactatggataaattaccattgtttgtttgatcagtattaataacagcattcttattattgttatctttacctgtactagcaggagctataacaatgctattaacagatagaaactttaatacaagtttctttgacccagcaggtggaggagatcctattctttatcaacatttattt	28	28.57	Nanomia cara	100	BOLD	No	No	Insufficient reads
655	South	75.558	29.32	200	0	January	12.01.2018	Cyphonaute	NA	NA	gctagcaagaaatatttctcatagaggaagatctgttgaccttgcaatcttctcccttcatctggcaggtgcttcttctattctaggagctattaattttataactactattattaacatgcgaagatcgtcaataacttttgctcggatacccctattcatctgatccgtatttattacagctattttactggtcctttccttaccagtcctagcgggtgcaattacaatacttctcacggaccgtaatttaaataccacttttttcgaccctgctgggggaggggatcccatcctataccaacacttattt	6221	99.31	Alcyonidium mamillatum	99.4	BLAST	Yes	Yes	Alcyonidium mamillatum
656	South	75.558	29.32	200	0	January	12.01.2018	Egg	NA	NA	ttatcaggtccggtagctcacgcaggtggttgtgtagatttagcaatattttctttacatttagctggtgcttcttctataatggcctcaataaattttataactacaataattaatatgcgagctcccggtatgacaatggaccgagtccctttatttgtttgatcaatttttattacaacttttttattattattatctttaccagttttagctggtgcaattacaatgttattaactgaccgtaatataaaaacttccttttttgatccaacaggaggaggagacccaatattattccaacacttgttc	23	65.22	Ophiocten gracilis	100	BOLD	Yes	No	Insufficient reads
657	South	75.558	29.32	200	0	January	12.01.2018	Egg	NA	NA	attgtcttcatacccattttctggtgcatctatagattttgtaattttctctattcatgttgctggggcttcttctattgctggagctttaaactttttaactacgggtttaaatatgcgaattaaatcaatagagttaaagcgaatacctttatttgtttgatctattattgtaactgcttttctattggtgttagcaatgcctgttttggcgggagctgttactatgcttattagggaccgtcattttaatacaactttttatgatccagcgggagggggggatcctgtattatttgtgcatctattt	10	100	Hiatella sp. K	100	BOLD	Yes	No	Unknown
658	South	75.558	29.32	200	0	January	12.01.2018	Cyphonaute	NA	NA	gctagcaagaaatatttctcatagaggaagatctgttgaccttgcaatcttctcccttcatctggcaggtgcttcttctattctaggagctattaattttataactactattattaacatgcgaagatcgtcaataacttttgctcggatacccctattcatctgatccgtatttattacagctattttactggtcctttccttaccagtcctagcgggtgcaattacaatacttctcacggaccgtaatttaaataccacttttttcgaccctgctgggggaggggatcccatcctataccaacacttattt	10800	98.58	Alcyonidium mamillatum	99.4	BLAST	Yes	Yes	Alcyonidium mamillatum
659	South	75.558	29.32	200	0	January	12.01.2018	Nudibranch 1	NA	NA	tctttcgggggctattggacatggaggctgttctgttgatttggctattttttctttacatttggcaggtatatcttctcttctaggtgcaattaattttattactactatttttaatatgcggtctccagcaatgactttggatcgtctaagattgtttgtatggtctgtcttggtcactgctttcttgcttttgctttccttacctgttttggccggagcaattactatgttgttaactgaccgtaattttaatactagattttttgacccggctggtggtggagatcctattttgtaccaacatttattt	1802	96.61	Dendronotus patricki	100	BLAST	Yes	Yes	Dendronotus patricki
660	South	75.558	29.32	200	0	January	12.01.2018	Nudibranch 1	NA	NA	tctttctggggctattgggcatggaggttgttctgttgatctagctattttttctttgcacctagcaggaatgtcttctcttcttggtgcaattaattttattactactatttttaacatacggtctccagctatgactttagaccggttgagattatttgtgtggtctgttcttgttactgcttttttattgttactttctttacctgttttagcaggagcaattacaatgttacttacagatcgtaattttaatactaggttttttgacccagctggtggaggggatcctattttgtatcaacacttattc	5493	99.62	Dendronotus kalikal	100	BOLD	Yes	Yes	Dendronotus kalikal
661	South	75.558	29.32	200	0	January	12.01.2018	Nudibranch 1	NA	NA	tctttcaggtcctatgggtcatggaggttgttctgttgatttggctattttctctcttcatctagctgggatatcatctctcttaggtgctattaattttattactactatttttaatatgcgagctccggaaataacttgagatcgattaagcttatttgtttgatctgttttagttactgctttcttattactcttatctttaccagttttggctggtgctattactatacttttaacagatcggaattttaatactagatttttcgaccctgcggggggaggagatcctattttataccaacatctattt	6994	97.28	Cuthonella concinna	99.7	BOLD	Yes	Yes	Cuthonella concinna
662	South	75.558	29.32	200	0	January	12.01.2018	Unknown blob	NA	NA	attagcaagaaatctagcccatgctggcccatcagtagacctcgctatcttctctctacatttagccggagtatcttccattttaggctccattaatttcatctcaaccgtcgcaaatatacgctcagccggattctgcctagaacgagtcccattatttgtttgatctgtaaaaatcacaacagtacttcttcttctatctctaccagtcctagctggtgctattacaatactactaacagaccgaaaccttaatacttcattttttgatcctgctggagggggagatcccattttatatcaacacctcttt	4421	99.98	Polyphysia crassa	100	BOLD	Yes	Yes	Polyphysia crassa
663	South	75.558	29.32	200	0	January	12.01.2018	Nudibranch 1	NA	NA	tctttccggtgctattgggcatgggggttgttctgtggatttagctatcttttctttacatctagcaggtatgtcctctcttcttggtgcaattaattttattactactatttttaatatgcggtctccagcgatgactttagatcggcttaggttatttgtctgatctgttcttgtcactgcttttttgttgctactttctttacctgttttagctggggctattactatgctgcttacagatcggaatttcaacactaggttttttgatccagccggtggaggggacccaattttgtaccagcatttattc	2436	84.07	Dendronotus frondosus	100	BOLD	Yes	Yes	Dendronotus frondosus
664	South	75.558	29.32	200	0	January	12.01.2018	Nudibranch 2	NA	NA	tttatctggtgctgtaggacatggaggttgttctgtagatttagccattttttctcttcatttagctggtatatcttctttattaggagctattaattttattactactatttttaatatgcgatctcctgctataactttagaccggcttaggttatttgtttggtctgttcttgttacagcctttttattattattatctcttcctgttttagctggtgccattactatgttactaactgatcgtaattttaatactagattttttgatccggctggtggaggagaccctattttatatcagcatttattc	8694	97.42	Doto coronata	99.7	BOLD	Yes	Yes	Doto coronata
665	South	75.558	29.32	200	0	January	12.01.2018	Limacina	NA	NA	cttgagaagtgcaggtcatgtaacacaaagtgttgatttttgtattttttctctacatttagcaggactttcttcaatcattggagcaatcaatataattacaacaattctaattagtcgacgggtaagactatctcgaataagtttatacttatgaagcatactcatcacattaattttacttttattatcattaccggttttagcaggtgcaattactatactgttaatagaccgtaattttaatacaactttttttgatcctgtaggagggggtgatcctgtattatttcaacatttattt	1793	91.97	Limacina retroversa	96.9	BOLD	No	Yes	Limacina retroversa 96.9 %
666	South	75.558	29.32	200	0	January	12.01.2018	Nudibranch 1	NA	NA	tctttcgggggctattggacatggaggctgttctgttgatttggctattttttctttacatttggcaggtatatcttctcttctaggtgcaattaattttattactactatttttaatatgcggtctccagcaatgactttggatcgtctaagattgtttgtatggtctgtcttggtcactgctttcttgcttttgctttccttacctgttttggccggagcaattactatgttgttaactgaccgtaattttaatactagattttttgacccggctggtggtggagatcctattttgtaccaacatttattt	3764	98.96	Dendronotus patricki	100	BLAST	Yes	Yes	Dendronotus patricki
667	South	75.558	29.32	200	0	January	12.01.2018	Limacina	NA	NA	cttgagaagtgcaggtcatgtaacacaaagtgttgatttttgtattttttctctacatttagcaggactttcttcaatcattggagcaatcaatataattacaacaattctaattagtcgacgggtaagactatctcgaataagtttatacttatgaagcatactcatcacattaattttacttttattatcattaccggttttagcaggtgcaattactatactgttaatagaccgtaattttaatacaactttttttgatcctgtaggagggggtgatcctgtattatttcaacatttattt	2226	95.28	Limacina retroversa	96.9	BOLD	No	Yes	Limacina retroversa 96.9 %
668	South	75.558	29.32	200	0	January	12.01.2018	Limacina	NA	NA	attaagtaatataggtcacataactcaaagagtagatttttgtattttttcattacatttagcaggtttatcatcaattattggggcaatcaacataattacaacaattatagtaagacgttcaaaaataataacactatctcgaataagattatatttatgaagaatattaattactttaattttattattactatccttacctgtacttgcaggtgctatcacaatactattactagatcgtaattttaacactacattttttgatcctgtaggaggaggtgatccaatcttatttcaacatctattt	6227	98.91	Limacina helicina	100	BOLD	No	Yes	Limacina helicina
669	South	75.558	29.32	200	0	January	12.01.2018	Nudibranch 1	NA	NA	tctttccggtgctattgggcatgggggttgttctgtggatttagctatcttttctttacatctagcaggtatgtcctctcttcttggtgcaattaattttattactactatttttaatatgcggtctccagcgatgactttagatcggcttaggttatttgtctgatctgttcttgtcactgcttttttgttgctactttctttacctgttttagctggggctattactatgctgcttacagatcggaatttcaacactaggttttttgatccagccggtggaggggacccaattttgtaccagcatttattc	857	82.85	Dendronotus frondosus	100	BOLD	Yes	Yes	Dendronotus frondosus
670	South	75.558	29.32	200	0	January	12.01.2018	Limacina	NA	NA	attaagaagtataggtcatataactcaaagagtggactactgtatcttctcgcttcatttggcaggtttatcctcgattattggggcaattaatataattactactattacagttagacgatcaaaggtaatgagtttatcacgattaagactatatttatgaagaatattaattacattaattctattgttgttatcactaccagtactagctggagcaatcacaatactgttattggaccgtaatttcaacacaacttttttcgatcctgtaggaggaggagatccagtgctttttcagcatttgttt	301	98.67	Limacina retroversa	92	BOLD	No	Yes	Limacina retroversa 92 %
671	South	75.558	29.32	200	0	January	12.01.2018	Nudibranch 1	NA	NA	tctttcgggggctattggacatggaggctgttctgttgatttggctattttttctttacatttggcaggtatatcttctcttctaggtgcaattaattttattactactatttttaatatgcggtctccagcaatgactttggatcgtctaagattgtttgtatggtctgtcttggtcactgctttcttgcttttgctttccttacctgttttggccggagcaattactatgttgttaactgaccgtaattttaatactagattttttgacccggctggtggtggagatcctattttgtaccaacatttattt	8313	98.57	Dendronotus patricki	100	BLAST	Yes	Yes	Dendronotus patricki
672	South	75.558	29.32	200	0	January	12.01.2018	Egg	NA	NA	ttagcagggaactactcccaccctggagcctccgtagacctaaccatcttctccttacacctagcaggtgtctcctctatcttaggggccatcaatttcatcacaacaattatcaatataaaaccccctgccataacccaataccaaacgcccctcttcgtctgatccgtcctaatcacagcagtcctacttctcctatctctcccagtcctagctgctggcatcactatactactaacagaccgcaacctcaacaccaccttcttcgaccccgccggaggaggagaccccattctataccaacacctattc	467	28.91	Homo sapiens	100	BOLD	No	No	Insufficient reads
673	South	75.558	29.32	200	0	January	12.01.2018	Nudibranch 2	NA	NA	tttatctggggctgtaggacatgggggttgttctgtagatttagctattttttctcttcatttggctggtatatcttccttattaggggctattaattttattactacaatttttaatatgcgttctcctgctataactttagatcgattaagcttatttgtttgatctgttcttgttactgcttttttattacttttagctcttcctgttttagcaggtgcaattactatgctattaactgatcgaaattttaatactagattttttgacccagctggagggggagatcctattttatatcagcatttattt	4439	93.42	Doto fragilis	100	BOLD	Yes	Yes	Doto fragilis
674	South	75.558	29.32	200	0	January	12.01.2018	Foram	NA	NA	attatctggacctcaagcacattctggaggatcagtagatttagctattttcagtttacacactgcaggagcttcatctataatgggagctattaactttataactactatttttaatatgagagcacctggaatgactatggataaattaccattgtttgtttgatcagtattaataacagcattcttattattgttatctttacctgtactagcaggagctataacaatgctattaacagatagaaactttaatacaagtttctttgacccagcaggtggaggagatcctattctttatcaacatttattt	174	22.41	Nanomia cara	100	BOLD	No	No	Insufficient reads
675	South	75.558	29.32	200	0	January	12.01.2018	Nudibranch 1	NA	NA	tctttctggggctattgggcatggaggttgttctgttgatttagctattttttctttacatttagcgggtatgtcttctcttcttggtgcaattaatttcattactactatttttaacatacggtctccagctatgactttagatcgtttgagattgtttgtgtgatctgttcttgttactgctttcttattattactttctttacctgttttagctggtgcaattacaatgttactcacagaccgtaattttaacactaggttttttgatccagctggtgggggggatcctattttgtatcaacatttattt	7365	96.24	Dendronotus sp. MM	99.7	BOLD	Yes	Yes	Dendronotus sp. MM
676	South	75.558	29.32	200	0	January	12.01.2018	Limacina	NA	NA	attaagtaggataggacacattactcatagagtagattttgcaattttttcattacacttagcaggactatcatctattattggtagaattaatatgattactacaatcttggtcaggcgtttcggaggtataagcctatcgcgaataagattgtacttatgaggtatattagtgactttaatcttattattgctatcactgcctgtacttgcaggggctattaccatattgttaatagaccgtaattttaacacaactttttttgatcctgtaggaggaggagatccagtactgttccagcatttattt	6507	97.46	Limacina helicina	80.9	BOLD	No	Yes	Limacina helicina 80.9 %
677	South	75.558	29.32	200	0	January	12.01.2018	Limacina	NA	NA	tttaagtagaataggtcatatcactcatagagtagattttgctatcttttcactgcatctggcaggattatcatctatcatcgggagaattaatatgatcactacagttatagtaaggcgctttggaggtatgagtttatcacgaataagattgtacttatgaaggatattggttaccctaatcctcttattactatcattacctgtattagccggagctatcaccatactactaatagaccgaaacttcaacacaactttctttgatcctgtgggagggggcgatccagtactttttcagcatttgttt	11963	98.3	No match	0	No match	No match	No	Unknown
678	South	75.558	29.32	200	0	January	12.01.2018	Nudibranch 1	NA	NA	tctttccggtgctattgggcatgggggttgttctgtggatttagctatcttttctttacatctagcaggtatgtcctctcttcttggtgcaattaattttattactactatttttaatatgcggtctccagcgatgactttagatcggcttaggttatttgtctgatctgttcttgtcactgcttttttgttgctactttctttacctgttttagctggggctattactatgctgcttacagatcggaatttcaacactaggttttttgatccagccggtggaggggacccaattttgtaccagcatttattc	2793	73.76	Dendronotus frondosus	100	BOLD	Yes	Yes	Dendronotus frondosus
680	South	75.558	29.32	250	200	January	12.01.2018	Cyphonaute	NA	NA	gctagcaagaaatatttctcatagaggaagatctgttgaccttgcaatcttctcccttcatctggcaggtgcttcttctattctaggagctattaattttataactactattattaacatgcgaagatcgtcaataacttttgctcggatacccctattcatctgatccgtatttattacagctattttactggtcctttccttaccagtcctagcgggtgcaattacaatacttctcacggaccgtaatttaaataccacttttttcgaccctgctgggggaggggatcccatcctataccaacacttattt	4223	99.79	Alcyonidium mamillatum	99.4	BLAST	Yes	Yes	Alcyonidium mamillatum
681	South	75.558	29.32	250	200	January	12.01.2018	Nudibranch 1	NA	NA	tctttccggtgctattgggcatgggggttgttctgtggatttagctatcttttctttacatctagcaggtatgtcctctcttcttggtgcaattaattttattactactatttttaatatgcggtctccagcgatgactttagatcggcttaggttatttgtctgatctgttcttgtcactgcttttttgttgctactttctttacctgttttagctggggctattactatgctgcttacagatcggaatttcaacactaggttttttgatccagccggtggaggggacccaattttgtaccagcatttattc	1	100	Dendronotus frondosus	100	BOLD	Yes	Yes	Insufficient reads
682	South	75.558	29.32	250	200	January	12.01.2018	Limacina	NA	NA	attaagtaatataggtcacataactcaaagagtagatttttgtattttttcattacatttagcaggtttatcatcaattattggggcaatcaacataattacaacaattatagtaagacgttcaaaaataataacactatctcgaataagattatatttatgaagaatattaattactttaattttattattactatccttacctgtacttgcaggtgctatcacaatactattactagatcgtaattttaacactacattttttgatcctgtaggaggaggtgatccaatcttatttcaacatctattt	18	50	Limacina helicina	100	BOLD	No	Yes	Insufficient reads
683	South	75.558	29.32	250	200	January	12.01.2018	Limacina	NA	NA	attaagtaatataggtcacataactcaaagagtagatttttgtattttttcattacatttagcaggtttatcatcaattattggggcaatcaacataattacaacaattatagtaagacgttcaaaaataataacactatctcgaataagattatatttatgaagaatattaattactttaattttattattactatccttacctgtacttgcaggtgctatcacaatactattactagatcgtaattttaacactacattttttgatcctgtaggaggaggtgatccaatcttatttcaacatctattt	5	80	Limacina helicina	100	BOLD	No	Yes	Insufficient reads
684	South	75.558	29.32	250	200	January	12.01.2018	Nudibranch 1	NA	NA	tctttcgggggctattggacatggaggctgttctgttgatttggctattttttctttacatttggcaggtatatcttctcttctaggtgcaattaattttattactactatttttaatatgcggtctccagcaatgactttggatcgtctaagattgtttgtatggtctgtcttggtcactgctttcttgcttttgctttccttacctgttttggccggagcaattactatgttgttaactgaccgtaattttaatactagattttttgacccggctggtggtggagatcctattttgtaccaacatttattt	15	93.33	Dendronotus patricki	100	BLAST	Yes	Yes	Dendronotus patricki
685	South	75.558	29.32	250	200	January	12.01.2018	Limacina	NA	NA	tctttcaggtgcaattgggcacggggggtgttcggtagacttggcaattttttctttacatttagcagggatgtcttctttgttgggtgctattaattttattactaccatttttaacatacgctctccggaaataacaatagatcggttaagtttatttgtttgatcagttctggttactgcttttcttttattactctctcttcctgtattagctggggctattactatgcttttaactgatcgtaattttaatactaggtttttcgatcctgccggagggggggatcctatcttataccagcatttattt	1691	99.35	Chlamylla borealis	99.3	BOLD	Yes	Yes	Chlamylla borealis
686	South	75.558	29.32	250	200	January	12.01.2018	Ball	NA	NA	tagctagaaatttaacccactcaagcccttctgtagactttgccatcttttcccttcaccttgccggtgtttcctctattctaggggccttaaactttattactactgtaattaacatacggtgggacggaatacgacctgaacgactccctctctttatttgagcagtaactatcacagccgtactccttctcttatctctacccgttctagcaggagcaatcactatgcttctaacagaccgtaacctaaacacatccttttttgaccctcaaggagggggagacccggtcctctaccaacatttattc	3648	99.84	Bonelliidae	80.1	BLAST	Yes	Yes	Bonelliidae 80.1 %
687	South	75.558	29.32	250	200	January	12.01.2018	Isopoda	NA	NA	gctatctggcagtatcgcacataggggggcttcagtagacctggctattttttctttacacttagcgggcgcgtcttcgattctaggggccgttaactttatcaccacttttattaatatgcgggccccggggttgactttagaccgggcacccctctttacttggtctgtatttatcacagctgtgttattattgctctctctgccggtgttggccggggctatcactatgctactaacggaccgtaatttaaatacctctttttttgaccctagggggggtggggaccccatcttgtaccaacacttgttt	64	96.88	Rostroculodes borealis	78.7	BLAST	Ambiguous	Yes	Rostroculodes borealis 78.7 %
688	South	75.558	29.32	250	200	January	12.01.2018	Limacina	NA	NA	attaagtaatataggtcacataactcaaagagtagatttttgtattttttcattacatttagcaggtttatcatcaattattggggcaatcaacataattacaacaattatagtaagacgttcaaaaataataacactatctcgaataagattatatttatgaagaatattaattactttaattttattattactatccttacctgtacttgcaggtgctatcacaatactattactagatcgtaattttaacactacattttttgatcctgtaggaggaggtgatccaatcttatttcaacatctattt	1127	76.49	Limacina helicina	100	BOLD	No	Yes	Limacina helicina
689	South	75.558	29.32	250	200	January	12.01.2018	Nudibranch 1	NA	NA	tttatctggtgctgtaggacatggaggttgttctgtagatttagccattttttctcttcatttagctggtatatcttctttattaggagctattaattttattactactatttttaatatgcgatctcctgctataactttagaccggcttaggttatttgtttggtctgttcttgttacagcctttttattattattatctcttcctgttttagctggtgccattactatgttactaactgatcgtaattttaatactagattttttgatccggctggtggaggagaccctattttatatcagcatttattc	13462	97.21	Doto coronata	99.7	BOLD	Yes	Yes	Doto coronata
690	South	75.558	29.32	250	200	January	12.01.2018	Egg	NA	NA	tttgtcaggaattttagctcattctggtggcgctgtcgatttagctatttttagcttacatttggcgggtatttcgtctattttaggagctataaattttattgtaactattttaaacatgcgttgtcctggtatgactgctcatagaacacctttatttgtttgggctgtttttataacagcttttttacttttgttatcacttcctgttttagctggcgctattacaatgttattaacagatagaaattttaatacgtctttctttgatccaaacggtggtggtgatcctgtcttatatcagcatttgttt	25	32	Phaeocystis antarctica	91.6	BOLD	No	No	Insufficient reads
691	South	75.558	29.32	250	200	January	12.01.2018	Nudibranch 1	NA	NA	tctatcaggggctattgggcatggtggatgttctgtggatttggctattttttctttgcatttagcagggatgtcttctcttcttggtgcaatcaattttattactactatttttaatatgcggtctccagcgatgactttagatcggttaagattatttgtgtgatctgttcttgttactgcttttttattattactttctttacctgttttagctggggcaattactatgctgcttacagaccggaattttaatactaggttctttgacccagccggtgggggagacccaattttgtaccagcatttattt	643	99.07	Dendronotus dalli	99.7	BOLD	Yes	Yes	Dendronotus dalli
692	South	75.558	29.32	250	200	January	12.01.2018	Nudibranch 1	NA	NA	tctttccggtgctattgggcatgggggttgttctgtggatttagctatcttttctttacatctagcaggtatgtcctctcttcttggtgcaattaattttattactactatttttaatatgcggtctccagcgatgactttagatcggcttaggttatttgtctgatctgttcttgtcactgcttttttgttgctactttctttacctgttttagctggggctattactatgctgcttacagatcggaatttcaacactaggttttttgatccagccggtggaggggacccaattttgtaccagcatttattc	863	90.27	Dendronotus frondosus	100	BOLD	Yes	Yes	Dendronotus frondosus
693	South	75.558	29.32	250	200	January	12.01.2018	Egg	NA	NA	tctttcaagaaatattgcacacgcagggggctcagtagattttgctattttttctctacatttggccggggtgagatcaattttaggggcagttaattttattaggactttaggaaacctgcgagtctttggtatattactggaccggataccattattcgcatggtctgtcttagtcactgcggtgctgctattgctctctatgccagtactcgctggcgcgattactatgcttctaacagaccgaaatttaaacacgtcgttttatgatgtgggagggggtggagaccctatcttataccaacatcttttt	404	86.39	Microcalanus pusillus	100	BOLD	No	Yes	Microcalanus pusillus
694	South	75.558	29.32	250	200	January	12.01.2018	Nudibranch 2	NA	NA	ttatctggtgctgtgggacatggaggttgttctgtagatttagccattttctctcttcatttagctggtatgtcttcattattaggagctattaattttattactactatttttaatatacgatcccctgctataactttagatcgattaaggctatttgtttggtctgttcttgttacagccttcttattgttgttatctcttcctgttttagctggtgctattactatgttgttaactgatcgtaactttaatactaggttttttgatccggctggaggaggagatcctattttatatcagcatttattt	8691	99.44	Doto cf. maculata	99.3	BOLD	Yes	Yes	Doto cf. maculata
695	South	75.558	29.32	250	200	January	12.01.2018	Clione	NA	NA	actaagatcgttagtaggacataacaaccactctgttgatctggctattttttctttacacttagctggtattaggtctattttaggtgcagtaaattttattactactatcttaaatatacgagcccctggagttagctgagaacgactatctctatttgtgtggtctcttttagtaacaacagttcttctacttttatctcttcctgtattggcaggagctatcactatactcctcactgaccgtaatttcaacacagggttctttgaccctggggccggtggagaccctatcttatttcaacatttattt	6917	99.51	Clione limacina	99.7	BOLD	No	Yes	Clione limacina
696	South	75.558	29.32	250	200	January	12.01.2018	Nudibranch 2	NA	NA	tttatctggtgctgtaggacatggaggttgttctgtagatttagccattttttctcttcatttagctggtatatcttctttattaggagctattaattttattactactatttttaatatgcgatctcctgctataactttagaccggcttaggttatttgtttggtctgttcttgttacagcctttttattattattatctcttcctgttttagctggtgccattactatgttactaactgatcgtaattttaatactagattttttgatccggctggtggaggagaccctattttatatcagcatttattc	4793	98.23	Doto coronata	99.7	BOLD	Yes	Yes	Doto coronata
697	South	75.558	29.32	250	200	January	12.01.2018	Nudibranch 1	NA	NA	tctttcaggtcctatgggtcatggaggttgttctgttgatttggctattttctctcttcatctagctgggatatcatctctcttaggtgctattaattttattactactatttttaatatgcgagctccggaaataacttgagatcgattaagcttatttgtttgatctgttttagttactgctttcttattactcttatctttaccagttttggctggtgctattactatacttttaacagatcggaattttaatactagatttttcgaccctgcggggggaggagatcctattttataccaacatctattt	621	99.19	Cuthonella concinna	99.7	BOLD	Yes	Yes	Cuthonella concinna
698	South	75.558	29.32	250	200	January	12.01.2018	Nudibranch 2	NA	NA	tttatctggtgctgtaggacatggaggttgttctgtagatttagccattttttctcttcatttagctggtatatcttctttattaggagctattaattttattactactatttttaatatgcgatctcctgctataactttagaccggcttaggttatttgtttggtctgttcttgttacagcctttttattattattatctcttcctgttttagctggtgccattactatgttactaactgatcgtaattttaatactagattttttgatccggctggtggaggagaccctattttatatcagcatttattc	3638	99.31	Doto coronata	99.7	BOLD	Yes	Yes	Doto coronata
699	South	75.558	29.32	250	200	January	12.01.2018	Limacina	NA	NA	No sequence	0	0	No sequence	0	No sequence	No sequence	No	Insufficient reads
700	South	75.558	29.32	250	200	January	12.01.2018	Nudibranch 1	NA	NA	tctttccggtgctattgggcatgggggttgttctgtggatttagctatcttttctttacatctagcaggtatgtcctctcttcttggtgcaattaattttattactactatttttaatatgcggtctccagcgatgactttagatcggcttaggttatttgtctgatctgttcttgtcactgcttttttgttgctactttctttacctgttttagctggggctattactatgctgcttacagatcggaatttcaacactaggttttttgatccagccggtggaggggacccaattttgtaccagcatttattc	450	89.78	Dendronotus frondosus	100	BOLD	Yes	Yes	Dendronotus frondosus
701	South	75.558	29.32	250	200	January	12.01.2018	Limacina	NA	NA	attaaggggtataggccatataacccagagggttgatttctgtattttttcattacatttagcaggattgtcatcaattattggatctattaatataattacaactattatcattagacgatctaaagttgcagtgctgtcacgattaagattgtatttatgaagaatattgattactctgattttacttctactatcattacctgtgctagcaggtgcaattacaatattgttaatagatcgtaatttcaacacaactttttatgatcctgtgggagggggggatccaattttgtttcaacatttgttt	347	94.81	Limacina retroversa	83	BOLD	No	Yes	Limacina retroversa 83 %
702	South	75.558	29.32	321	250	January	12.01.2018	Planula	NA	NA	attaagcacttctttcatgagcttatcaccttcaagtacaggaaatcttatctttggtttattaatctctggtatatcctcatgtctcacatctcttaatttctatacaacaattctaaatctgagatcttattatctgaatttaaagactatgccattattcccttgggctctcttcattacaggaggaatgcttttattaacattaccaatcttatcaggagctcttctaatggtcttggctgatcttcattctaatacacttttctttgaaccaatctttggaggagatcctatattctatcaacacttattt	372	93.82	Thoracosphaera heimii	96.8	BLAST	No	No	Unknown
703	South	75.558	29.32	321	250	January	12.01.2018	Egg mass	NA	NA	tctatctagaaatatcgcgcatgctggaggatcggtagattttgcaattttttcattgcatttagccggggttagatctattttaggggctgttaattttatcagaacattgggtaatttacgagtattcgaaatattgttagatcgagttcccctgtttgcttggtctgtgttaattacggcagttctcttactattgtctctgcccgtgttagccggggccattactatattattaacagatcgaaacttaaacacaactttttatgatgtgggaggggggggtgatcctattctatatcaacatttattt	10639	99.02	Paraeuchaeta norvegica	100	BOLD	No	Yes	Paraeuchaeta norvegica
704	South	75.558	29.32	321	250	January	12.01.2018	Bivalve	283	Anterior-posterior length	attgtcttcatacccattttctggtgcatctatagattttgtaattttctctattcatgttgctggggcttcttctattgctggagctttaaactttttaactacgggtttaaatatgcgaattaaatcaatagagttaaagcgaatacctttatttgtttgatctattattgtaactgcttttctattggtgttagcaatgcctgttttggcgggagctgttactatgcttattagggaccgtcattttaatacaactttttatgatccagcgggagggggggatcctgtattatttgtgcatctattt	61	95.08	Hiatella sp. K	100	BOLD	Yes	Yes	Hiatella sp. K
705	South	75.558	29.32	321	250	January	12.01.2018	Large egg	NA	NA	ttatctagtattcaaacgcattcgggaggggcggtcgacatggccatttttagccttcatttagcgggtgcttcttctatattaggggcaatgaattttataacgaccatatttaatatgagagcgccagggttgaccatggacagacttccattatttgtgtggtctattttaattactgcctttttattgttgctttctttacctgttttagcaggggctattactatgcttttaacagatagaaattttaatacgactttctttgatccggccgggggtggagaccctattttattccaacatttattt	9768	99.97	Hormathia digitata	100	BOLD	Yes	Yes	Hormathia digitata
706	South	75.558	29.32	321	250	January	12.01.2018	Nudibranch 1	NA	NA	tctttcgggggctattggacatggaggctgttctgttgatttggctattttttctttacatttggcaggtatatcttctcttctaggtgcaattaattttattactactatttttaatatgcggtctccagcaatgactttggatcgtctaagattgtttgtatggtctgtcttggtcactgctttcttgcttttgctttccttacctgttttggccggagcaattactatgttgttaactgaccgtaattttaatactagattttttgacccggctggtggtggagatcctattttgtaccaacatttattt	1150	96.52	Dendronotus patricki	100	BLAST	Yes	Yes	Dendronotus patricki
707	South	75.558	29.32	321	250	January	12.01.2018	Cyphonaute	NA	NA	gctagcaagaaatatttctcatagaggaagatctgttgaccttgcaatcttctcccttcatctggcaggtgcttcttctattctaggagctattaattttataactactattattaacatgcgaagatcgtcaataacttttgctcggatacccctattcatctgatccgtatttattacagctattttactggtcctttccttaccagtcctagcgggtgcaattacaatacttctcacggaccgtaatttaaataccacttttttcgaccctgctgggggaggggatcccatcctataccaacacttattt	13872	99.63	Alcyonidium mamillatum	99.4	BLAST	Yes	Yes	Alcyonidium mamillatum
708	South	75.558	29.32	321	250	January	12.01.2018	Nudibranch 1	NA	NA	tctttccggtgctattgggcatgggggttgttctgtggatttagctatcttttctttacatctagcaggtatgtcctctcttcttggtgcaattaattttattactactatttttaatatgcggtctccagcgatgactttagatcggcttaggttatttgtctgatctgttcttgtcactgcttttttgttgctactttctttacctgttttagctggggctattactatgctgcttacagatcggaatttcaacactaggttttttgatccagccggtggaggggacccaattttgtaccagcatttattc	144	86.11	Dendronotus frondosus	100	BOLD	Yes	Yes	Dendronotus frondosus
709	South	75.558	29.32	321	250	January	12.01.2018	Clione	NA	NA	actaagatcgttagtaggacataacaaccactctgttgatctggctattttttctttacacttagctggtattaggtctattttaggtgcagtaaattttattactactatcttaaatatacgagcccctggagttagctgagaacgactatctctatttgtgtggtctcttttagtaacaacagttcttctacttttatctcttcctgtattggcaggagctatcactatactcctcactgaccgtaatttcaacacagggttctttgaccctggggccggtggagaccctatcttatttcaacatttattt	14727	99.63	Clione limacina	99.7	BOLD	No	Yes	Clione limacina
710	South	75.558	29.32	321	250	January	12.01.2018	Nauplius	NA	NA	gctttcaggaaatattgcccacggcggaagatcagtagacttggcaattttttctctacatttagcaggggcttcatctattttgggggcagtgaattttattactacttttatcaatatgcgagcgccgggtttaagattagaccgcgcgcctttatttacttgatcggtatttattactgctgtattacttttattgtctctacctgtgcttgcaggggctattactatattattaactgaccgtaatttaaatacttcttttttcgatccaaggggaggaggggaccctattttataccagcatttattt	1136	99.82	Ameroculodes edwardsi	81.9	BLAST	Ambiguous	Yes	Ameroculodes edwardsi 81.9 %
711	South	75.558	29.32	321	250	January	12.01.2018	Nothria	NA	NA	cttagcaagaaatattgcccacgcgggcccctctgtagatatggctattttctcccttcaccttgcggggatttcctctatccttggggccattaattttattactacagttattaacatacgatgaagaggattacgactagaacgaatccccctattcgtgtgaggagtagttattactactattctcctacttctatcgctcccggttcttgcgggggccatcactatattacttacagatcgcaacttaaatactgcattctttgaccctgcaggggggggcgatccaattttataccaacatctcttc	1443	97.51	Nothria conchylega CMC02	99	BOLD	Yes	Yes	Nothria conchylega CMC02
712	South	75.558	29.32	321	250	January	12.01.2018	Nudibranch 2	NA	NA	tctttcaggggcaattggacacggtggatgttctgtggatctagctatcttttctcttcatttagctggtatgtcttccttgttgggtgctattaattttattactactatttttaacatacgttctccggagatgactatggatcgattaagtttatttgtttgatcagtgttggttactgcttttttattgcttttatctcttcctgttttagcaggggctattactatgcttttaactgatcgtaattttaacactaggttttttgatcctgcgggaggaggggatcctattttgtatcaacatttattt	2653	99.7	Microchlamylla gracilis	99.7	BOLD	Yes	Yes	Microchlamylla gracilis
713	South	75.558	29.32	321	250	January	12.01.2018	Nudibranch 1	NA	NA	tctttccggtgctattgggcatgggggttgttctgtggatttagctatcttttctttacatctagcaggtatgtcctctcttcttggtgcaattaattttattactactatttttaatatgcggtctccagcgatgactttagatcggcttaggttatttgtctgatctgttcttgtcactgcttttttgttgctactttctttacctgttttagctggggctattactatgctgcttacagatcggaatttcaacactaggttttttgatccagccggtggaggggacccaattttgtaccagcatttattc	5065	97.63	Dendronotus frondosus	100	BOLD	Yes	Yes	Dendronotus frondosus
714	South	75.558	29.32	321	250	January	12.01.2018	Nudibranch 1	NA	NA	tctatcaggggctattgggcatggtggatgttctgtggatttggctattttttctttgcatttagcagggatgtcttctcttcttggtgcaatcaattttattactactatttttaatatgcggtctccagcgatgactttagatcggttaagattatttgtgtgatctgttcttgttactgcttttttattattactttctttacctgttttagctggggcaattactatgctgcttacagaccggaattttaatactaggttctttgacccagccggtgggggagacccaattttgtaccagcatttattt	8624	99.35	Dendronotus dalli	99.7	BOLD	Yes	Yes	Dendronotus dalli
715	South	75.558	29.32	321	250	January	12.01.2018	Nothria	NA	NA	cttagcaagaaatattgcccacgcgggcccctctgtagatatggctattttctcccttcaccttgcggggatttcctctatccttggggccattaattttattactacagttattaacatacgatgaagaggattacgactagaacgaatccccctattcgtgtgaggagtagttattactactattctcctacttctatcgctcccggttcttgcgggggccatcactatattacttacagatcgcaacttaaatactgcattctttgaccctgcaggggggggcgatccaattttataccaacatctcttc	7729	100	Nothria conchylega CMC02	99	BOLD	Yes	Yes	Nothria conchylega CMC02
716	South	75.558	29.32	321	250	January	12.01.2018	Bivalve	247	Anterior-posterior length	tctttcaagaaatttaatagggcattctggtgctgcgggagactttttaattttatctcttcatatcggaggtgcttcatctattatagcatccttaaatttttatagaacgtgaggaaatatgcgtgcaggatgtcatcccttccatcgtgtaccccttttttgtagttctattggggtcacaaggtttcttttaattctagctatgcctgtcttagcaggggcattaacaatactgttaacagatcgcaattttaatactgctttttttgatcctaccggtttaggggaccctatattgtttgttcatttattt	10	70	Mya truncata	100	BLAST	Yes	Yes	Insufficient reads
717	South	75.558	29.32	321	250	January	12.01.2018	Limacina	NA	NA	attaagtaatataggtcacataactcaaagagtagatttttgtattttttcattacatttagcaggtttatcatcaattattggggcaatcaacataattacaacaattatagtaagacgttcaaaaataataacactatctcgaataagattatatttatgaagaatattaattactttaattttattattactatccttacctgtacttgcaggtgctatcacaatactattactagatcgtaattttaacactacattttttgatcctgtaggaggaggtgatccaatcttatttcaacatctattt	1996	96.09	Limacina helicina	100	BOLD	No	Yes	Limacina helicina
718	South	75.558	29.32	321	250	January	12.01.2018	Nudibranch 1	NA	NA	tttatctggtgctgtaggacatggaggttgttctgtagatttagcaattttttctcttcatttagctggtatgtcttctttattaggagctattaattttattactactatttttaacatacggtctcctgctatgactttagatcgattaaggttatttgtttgatctgttcttgttacagcttttttattacttttatctcttcctgttttagcaggtgctattactatgttattaactgatcgtaattttaatactagattttttgatccggccggaggtggagatcctattttatatcaacacttattc	7337	99.84	Doto dunnei	100	BOLD	Yes	Yes	Doto dunnei
719	South	75.558	29.32	321	250	January	12.01.2018	Nudibranch 1	NA	NA	tctttcgggggctattggacatggaggctgttctgttgatttggctattttttctttacatttggcaggtatatcttctcttctaggtgcaattaattttattactactatttttaatatgcggtctccagcaatgactttggatcgtctaagattgtttgtatggtctgtcttggtcactgctttcttgcttttgctttccttacctgttttggccggagcaattactatgttgttaactgaccgtaattttaatactagattttttgacccggctggtggtggagatcctattttgtaccaacatttattt	6291	99.84	Dendronotus patricki	100	BLAST	Yes	Yes	Dendronotus patricki
720	South	75.558	29.32	321	250	January	12.01.2018	Egg mass	NA	NA	tctatctagaaatatcgcgcatgctggaggatcggtagattttgcaattttttcattgcatttagccggggttagatctattttaggggctgttaattttatcagaacattgggtaatttacgagtattcgaaatattgttagatcgagttcccctgtttgcttggtctgtgttaattacggcagttctcttactattgtctctgcccgtgttagccggggccattactatattattaacagatcgaaacttaaacacaactttttatgatgtgggaggggggggtgatcctattctatatcaacatttattt	10481	99.19	Paraeuchaeta norvegica	100	BOLD	No	Yes	Paraeuchaeta norvegica
721	South	75.558	29.32	321	250	January	12.01.2018	Nudibranch 2	NA	NA	tctttcaggtgcaattgggcacggggggtgttcggtagacttggcaattttttctttacatttagcagggatgtcttctttgttgggtgctattaattttattactaccatttttaacatacgctctccggaaataacaatagatcggttaagtttatttgtttgatcagttctggttactgcttttcttttattactctctcttcctgtattagctggggctattactatgcttttaactgatcgtaattttaatactaggtttttcgatcctgccggagggggggatcctatcttataccagcatttattt	4999	99.88	Chlamylla borealis	99.3	BOLD	Yes	Yes	Chlamylla borealis
722	South	75.558	29.32	321	250	January	12.01.2018	Nudibranch 1	NA	NA	tctttcgggggctattggacatggaggctgttctgttgatttggctattttttctttacatttggcaggtatatcttctcttctaggtgcaattaattttattactactatttttaatatgcggtctccagcaatgactttggatcgtctaagattgtttgtatggtctgtcttggtcactgctttcttgcttttgctttccttacctgttttggccggagcaattactatgttgttaactgaccgtaattttaatactagattttttgacccggctggtggtggagatcctattttgtaccaacatttattt	220	100	Dendronotus patricki	100	BLAST	Yes	Yes	Dendronotus patricki
723	South	75.558	29.32	321	250	January	12.01.2018	Limacina	NA	NA	attaagtaatataggtcacataactcaaagagtagatttttgtattttttcattacatttagcaggtttatcatcaattattggggcaatcaacataattacaacaattatagtaagacgttcaaaaataataacactatctcgaataagattatatttatgaagaatattaattactttaattttattattactatccttacctgtacttgcaggtgctatcacaatactattactagatcgtaattttaacactacattttttgatcctgtaggaggaggtgatccaatcttatttcaacatctattt	42	92.86	Limacina helicina	100	BOLD	No	Yes	Limacina helicina
724	South	75.558	29.32	321	250	January	12.01.2018	Nudibranch 1	NA	NA	tctttccggtgctattgggcatgggggttgttctgtggatttagctatcttttctttacatctagcaggtatgtcctctcttcttggtgcaattaattttattactactatttttaatatgcggtctccagcgatgactttagatcggcttaggttatttgtctgatctgttcttgtcactgcttttttgttgctactttctttacctgttttagctggggctattactatgctgcttacagatcggaatttcaacactaggttttttgatccagccggtggaggggacccaattttgtaccagcatttattc	6038	74.33	Dendronotus frondosus	100	BOLD	Yes	Yes	Dendronotus frondosus
725	South	75.558	29.32	321	250	January	12.01.2018	Large egg	NA	NA	cttagcaagaaatattgcccacgcgggcccctctgtagatatggctattttctcccttcaccttgcggggatttcctctatccttggggccattaattttattactacagttattaacatacgatgaagaggattacgactagaacgaatccccctattcgtgtgaggagtagttattactactattctcctacttctatcgctcccggttcttgcgggggccatcactatattacttacagatcgcaacttaaatactgcattctttgaccctgcaggggggggcgatccaattttataccaacatctcttc	3892	99.72	Nothria conchylega CMC02	99	BOLD	Yes	Yes	Nothria conchylega CMC02
726	South	75.558	29.32	321	250	January	12.01.2018	Cyphonaute	NA	NA	gctagcaagaaatatttctcatagaggaagatctgttgaccttgcaatcttctcccttcatctggcaggtgcttcttctattctaggagctattaattttataactactattattaacatgcgaagatcgtcaataacttttgctcggatacccctattcatctgatccgtatttattacagctattttactggtcctttccttaccagtcctagcgggtgcaattacaatacttctcacggaccgtaatttaaataccacttttttcgaccctgctgggggaggggatcccatcctataccaacacttattt	5227	99.85	Alcyonidium mamillatum	99.4	BLAST	Yes	Yes	Alcyonidium mamillatum
727	South	75.558	29.32	321	250	January	12.01.2018	Nudibranch 2	NA	NA	tttatctggtgctgtaggacatggaggttgttctgtagatttagccattttttctcttcatttagctggtatatcttctttattaggagctattaattttattactactatttttaatatgcgatctcctgctataactttagaccggcttaggttatttgtttggtctgttcttgttacagcctttttattattattatctcttcctgttttagctggtgccattactatgttactaactgatcgtaattttaatactagattttttgatccggctggtggaggagaccctattttatatcagcatttattc	10607	98.62	Doto coronata	99.7	BOLD	Yes	Yes	Doto coronata
728	South	75.558	29.32	321	250	January	12.01.2018	Nudibranch 2	NA	NA	tctttccggtgctattgggcatgggggttgttctgtggatttagctatcttttctttacatctagcaggtatgtcctctcttcttggtgcaattaattttattactactatttttaatatgcggtctccagcgatgactttagatcggcttaggttatttgtctgatctgttcttgtcactgcttttttgttgctactttctttacctgttttagctggggctattactatgctgcttacagatcggaatttcaacactaggttttttgatccagccggtggaggggacccaattttgtaccagcatttattc	3719	99.76	Dendronotus frondosus	100	BOLD	Yes	Yes	Dendronotus frondosus
729	South	75.558	29.32	321	250	January	12.01.2018	Limacina	NA	NA	attaagtaatataggtcacataactcaaagagtagatttttgtattttttcattacatttagcaggtttatcatcaattattggggcaatcaacataattacaacaattatagtaagacgttcaaaaataataacactatctcgaataagattatatttatgaagaatattaattactttaattttattattactatccttacctgtacttgcaggtgctatcacaatactattactagatcgtaattttaacactacattttttgatcctgtaggaggaggtgatccaatcttatttcaacatctattt	215	96.74	Limacina helicina	100	BOLD	No	Yes	Limacina helicina
730	South	75.558	29.32	321	250	January	12.01.2018	Nudibranch 1	NA	NA	tctttcgggggctattggacatggaggctgttctgttgatttggctattttttctttacatttggcaggtatatcttctcttctaggtgcaattaattttattactactatttttaatatgcggtctccagcaatgactttggatcgtctaagattgtttgtatggtctgtcttggtcactgctttcttgcttttgctttccttacctgttttggccggagcaattactatgttgttaactgaccgtaattttaatactagattttttgacccggctggtggtggagatcctattttgtaccaacatttattt	749	99.73	Dendronotus patricki	100	BLAST	Yes	Yes	Dendronotus patricki
731	South	75.558	29.32	321	250	January	12.01.2018	Nudibranch 1	NA	NA	tctttcgggggctattggacatggaggctgttctgttgatttggctattttttctttacatttggcaggtatatcttctcttctaggtgcaattaattttattactactatttttaatatgcggtctccagcaatgactttggatcgtctaagattgtttgtatggtctgtcttggtcactgctttcttgcttttgctttccttacctgttttggccggagcaattactatgttgttaactgaccgtaattttaatactagattttttgacccggctggtggtggagatcctattttgtaccaacatttattt	3162	99.75	Dendronotus patricki	100	BLAST	Yes	Yes	Dendronotus patricki
732	South	75.5	30	45	0	June	02.07.2018	Ophiopluteus 1	738	Posterodorsal arm	tttgtcaggccctaccgcacatgcaggaggctgcgtagacctcgcaattttttctctccacctagcaggtgcatcttcaattatggcctcaataaaatttattacaactattataaatatgcgtaggcccggcatgaccatggatcgacttccgctttttgtttgatctattttcttaacaactatattactactcctttctctgcctgttttagcaggagctattacaatgctactaactgatcgtaacataaaaacaacgttttttgatcctacaggaggaggagacccaatacttttccaacatttattt	13168	97.77	Ophiopholis aculeata	100	BOLD	Yes	Yes	Ophiopholis aculeata
733	South	75.5	30	45	0	June	02.07.2018	Ophiopluteus 2	1224	Posterodorsal arm	ttatcaggtccggtagctcacgcaggtggttgtgtagatttagcaatattttctttacatttagctggtgcttcttctataatggcctcaataaattttataactacaataattaatatgcgagctcccggtatgacaatggaccgagtccctttatttgtttgatcaatttttattacaacttttttattattattatctttaccagttttagctggtgcaattacaatgttattaactgaccgtaatataaaaacttccttttttgatccaacaggaggaggagacccaatattattccaacacttgttc	14094	97.47	Ophiocten gracilis	100	BOLD	Yes	Yes	Ophiocten gracilis
734	South	75.5	30	45	0	June	02.07.2018	Ophiopluteus 3	2586	Posterodorsal arm	ttatcaggtccggtagctcacgcaggtggttgtgtagatttagcaatattttctttacatttagctggtgcttcttctataatggcctcaataaattttataactacaataattaatatgcgagctcccggtatgacaatggaccgagtccctttatttgtttgatcaatttttattacaacttttttattattattatctttaccagttttagctggtgcaattacaatgttattaactgaccgtaatataaaaacttccttttttgatccaacaggaggaggagacccaatattattccaacacttgttc	3632	92.87	Ophiocten gracilis	100	BOLD	Yes	Yes	Ophiocten gracilis
735	South	75.5	30	45	0	June	02.07.2018	Ophiopluteus 1	606	Posterodorsal arm	ttatcaggtccggtagctcacgcaggtggttgtgtagatttagcaatattttctttacatttagctggtgcttcttctataatggcctcaataaattttataactacaataattaatatgcgagctcccggtatgacaatggaccgagtccctttatttgtttgatcaatttttattacaacttttttattattattatctttaccagttttagctggtgcaattacaatgttattaactgaccgtaatataaaaacttccttttttgatccaacaggaggaggagacccaatattattccaacacttgttc	22136	93.96	Ophiocten gracilis	100	BOLD	Yes	Yes	Ophiocten gracilis
736	South	75.5	30	45	0	June	02.07.2018	Ophiopluteus 1	923	Posterodorsal arm	tttgtcaggccctaccgcacatgcaggaggctgcgtagacctcgcaattttttctctccacctagcaggtgcatcttcaattatggcctcaataaaatttattacaactattataaatatgcgtaggcccggcatgaccatggatcgacttccgctttttgtttgatctattttcttaacaactatattactactcctttctctgcctgttttagcaggagctattacaatgctactaactgatcgtaacataaaaacaacgttttttgatcctacaggaggaggagacccaatacttttccaacatttattt	11371	99.79	Ophiopholis aculeata	100	BOLD	Yes	Yes	Ophiopholis aculeata
737	South	75.5	30	45	0	June	02.07.2018	Ophiopluteus 1	537	Posterodorsal arm	tttgtcaggccctaccgcacatgcaggaggctgcgtagacctcgcaattttttctctccacctagcaggtgcatcttcaattatggcctcaataaaatttattacaactattataaatatgcgtaggcccggcatgaccatggatcgacttccgctttttgtttgatctattttcttaacaactatattactactcctttctctgcctgttttagcaggagctattacaatgctactaactgatcgtaacataaaaacaacgttttttgatcctacaggaggaggagacccaatacttttccaacatttattt	2534	99.76	Ophiopholis aculeata	100	BOLD	Yes	Yes	Ophiopholis aculeata
738	South	75.5	30	45	0	June	02.07.2018	Ophiopluteus 1	704	Posterodorsal arm	actatctgggccagtcgcccatgcaggaggatgtgttgatttagctatattttctcttcatttagctggtgcatcttcgataatggcctctataaaatttattacaacaataattaatatgcgagcacctggaatgacaatggatcgaactcctttatttgtttgatcaattttaataaccacatttcttcttttattatctcttcctgttttagctggagcaattactatgttattaacagatcgaaaaattaaaacttctttttttgatccaacaggaggaggagatccaatcttattccaacatttattt	15951	84.35	Ophiura robusta	100	BOLD	Yes	Yes	Ophiura robusta
739	South	75.5	30	45	0	June	02.07.2018	Ophiopluteus 3	1362	Posterodorsal arm	ttatcaggtccggtagctcacgcaggtggttgtgtagatttagcaatattttctttacatttagctggtgcttcttctataatggcctcaataaattttataactacaataattaatatgcgagctcccggtatgacaatggaccgagtccctttatttgtttgatcaatttttattacaacttttttattattattatctttaccagttttagctggtgcaattacaatgttattaactgaccgtaatataaaaacttccttttttgatccaacaggaggaggagacccaatattattccaacacttgttc	18201	98.98	Ophiocten gracilis	100	BOLD	Yes	Yes	Ophiocten gracilis
740	South	75.5	30	45	0	June	02.07.2018	Ophiopluteus 3	2143	Posterodorsal arm	ttatcaggtccggtagctcacgcaggtggttgtgtagatttagcaatattttctttacatttagctggtgcttcttctataatggcctcaataaattttataactacaataattaatatgcgagctcccggtatgacaatggaccgagtccctttatttgtttgatcaatttttattacaacttttttattattattatctttaccagttttagctggtgcaattacaatgttattaactgaccgtaatataaaaacttccttttttgatccaacaggaggaggagacccaatattattccaacacttgttc	13193	97.5	Ophiocten gracilis	100	BOLD	Yes	Yes	Ophiocten gracilis
741	South	75.5	30	45	0	June	02.07.2018	Ophiopluteus 1	823	Posterodorsal arm	ttatcaggtccggtagctcacgcaggtggttgtgtagatttagcaatattttctttacatttagctggtgcttcttctataatggcctcaataaattttataactacaataattaatatgcgagctcccggtatgacaatggaccgagtccctttatttgtttgatcaatttttattacaacttttttattattattatctttaccagttttagctggtgcaattacaatgttattaactgaccgtaatataaaaacttccttttttgatccaacaggaggaggagacccaatattattccaacacttgttc	14216	98.45	Ophiocten gracilis	100	BOLD	Yes	Yes	Ophiocten gracilis
742	South	75.5	30	45	0	June	02.07.2018	Bivalve	232	Anterior-posterior length	attgtcttcatacccattttctggtgcatctatagattttgtaattttctctattcatgttgctggggcttcttctattgctggagctttaaactttttaactacgggtttaaatatgcgaattaaatcaatagagttaaagcgaatacctttatttgtttgatctattattgtaactgcttttctattggtgttagcaatgcctgttttggcgggagctgttactatgcttattagggaccgtcattttaatacaactttttatgatccagcgggagggggggatcctgtattatttgtgcatctattt	7322	99.97	Hiatella sp. K	100	BOLD	Yes	Yes	Hiatella sp. K
743	South	75.5	30	45	0	June	02.07.2018	Bivalve	228	Anterior-posterior length	attgtcttcatacccattttctggtgcatctatagattttgtaattttctctattcatgttgctggggcttcttctattgctggagctttaaactttttaactacgggtttaaatatgcgaattaaatcaatagagttaaagcgaatacctttatttgtttgatctattattgtaactgcttttctattggtgttagcaatgcctgttttggcgggagctgttactatgcttattagggaccgtcattttaatacaactttttatgatccagcgggagggggggatcctgtattatttgtgcatctattt	6271	99.54	Hiatella sp. K	100	BOLD	Yes	Yes	Hiatella sp. K
744	South	75.5	30	45	0	June	02.07.2018	Ophiopluteus 3	1373	Posterodorsal arm	ttatcaggtccggtagctcacgcaggtggttgtgtagatttagcaatattttctttacatttagctggtgcttcttctataatggcctcaataaattttataactacaataattaatatgcgagctcccggtatgacaatggaccgagtccctttatttgtttgatcaatttttattacaacttttttattattattatctttaccagttttagctggtgcaattacaatgttattaactgaccgtaatataaaaacttccttttttgatccaacaggaggaggagacccaatattattccaacacttgttc	8630	99.83	Ophiocten gracilis	100	BOLD	Yes	Yes	Ophiocten gracilis
745	South	75.5	30	45	0	June	02.07.2018	Ophiopluteus 2	823	Posterodorsal arm	ttatcaggtccggtagctcacgcaggtggttgtgtagatttagcaatattttctttacatttagctggtgcttcttctataatggcctcaataaattttataactacaataattaatatgcgagctcccggtatgacaatggaccgagtccctttatttgtttgatcaatttttattacaacttttttattattattatctttaccagttttagctggtgcaattacaatgttattaactgaccgtaatataaaaacttccttttttgatccaacaggaggaggagacccaatattattccaacacttgttc	10564	99.95	Ophiocten gracilis	100	BOLD	Yes	Yes	Ophiocten gracilis
746	South	75.5	30	45	0	June	02.07.2018	Ophiopluteus 1	582	Posterodorsal arm	attatccggaccagttgctcacgccggtggctgtgttgatttagctatattttccctccacttagctggtgcttcgtcaataatggcatcaattaactttattactacaattattaatatgcgagcgccaggtatgacaatggatcgaacccctttatttgtttgatcgattctaattacaacatttcttttattactctcattacctgttctagccggagccattaccatgttattaacagaccggaaaattaaaacatctttcttcgacccaacgggaggaggggaccctattttgttccaacacctattt	11284	93.33	Ophiura sarsii	100	BOLD	Yes	Yes	Ophiura sarsii
747	South	75.5	30	45	0	June	02.07.2018	Ophiopluteus 1	633	Posterodorsal arm	tttgtcaggccctaccgcacatgcaggaggctgcgtagacctcgcaattttttctctccacctagcaggtgcatcttcaattatggcctcaataaaatttattacaactattataaatatgcgtaggcccggcatgaccatggatcgacttccgctttttgtttgatctattttcttaacaactatattactactcctttctctgcctgttttagcaggagctattacaatgctactaactgatcgtaacataaaaacaacgttttttgatcctacaggaggaggagacccaatacttttccaacatttattt	11051	99.59	Ophiopholis aculeata	100	BOLD	Yes	Yes	Ophiopholis aculeata
748	South	75.5	30	45	0	June	02.07.2018	Bivalve	218	Anterior-posterior length	attgtcttcatacccattttctggtgcatctatagattttgtaattttctctattcatgttgctggggcttcttctattgctggagctttaaactttttaactacgggtttaaatatgcgaattaaatcaatagagttaaagcgaatacctttatttgtttgatctattattgtaactgcttttctattggtgttagcaatgcctgttttggcgggagctgttactatgcttattagggaccgtcattttaatacaactttttatgatccagcgggagggggggatcctgtattatttgtgcatctattt	11589	99.84	Hiatella sp. K	100	BOLD	Yes	Yes	Hiatella sp. K
749	South	75.5	30	45	0	June	02.07.2018	Bivalve	227	Anterior-posterior length	attgtcttcatacccattttctggtgcatctatagattttgtaattttctctattcatgttgctggggcttcttctattgctggagctttaaactttttaactacgggtttaaatatgcgaattaaatcaatagagttaaagcgaatacctttatttgtttgatctattattgtaactgcttttctattggtgttagcaatgcctgttttggcgggagctgttactatgcttattagggaccgtcattttaatacaactttttatgatccagcgggagggggggatcctgtattatttgtgcatctattt	12510	99.98	Hiatella sp. K	100	BOLD	Yes	Yes	Hiatella sp. K
750	South	75.5	30	45	0	June	02.07.2018	Bivalve	239	Anterior-posterior length	attgtcttcatacccattttctggtgcatctatagattttgtaattttctctattcatgttgctggggcttcttctattgctggagctttaaactttttaactacgggtttaaatatgcgaattaaatcaatagagttaaagcgaatacctttatttgtttgatctattattgtaactgcttttctattggtgttagcaatgcctgttttggcgggagctgttactatgcttattagggaccgtcattttaatacaactttttatgatccagcgggagggggggatcctgtattatttgtgcatctattt	113	97.35	Hiatella sp. K	100	BOLD	Yes	Yes	Hiatella sp. K
751	South	75.5	30	45	0	June	02.07.2018	Ophiopluteus 1	860	Posterodorsal arm	ttatcaggtccggtagctcacgcaggtggttgtgtagatttagcaatattttctttacatttagctggtgcttcttctataatggcctcaataaattttataactacaataattaatatgcgagctcccggtatgacaatggaccgagtccctttatttgtttgatcaatttttattacaacttttttattattattatctttaccagttttagctggtgcaattacaatgttattaactgaccgtaatataaaaacttccttttttgatccaacaggaggaggagacccaatattattccaacacttgttc	4698	89.29	Ophiocten gracilis	100	BOLD	Yes	Yes	Ophiocten gracilis
752	South	75.5	30	45	0	June	02.07.2018	Ophiopluteus 1	1088	Posterodorsal arm	ttatcaggtccggtagctcacgcaggtggttgtgtagatttagcaatattttctttacatttagctggtgcttcttctataatggcctcaataaattttataactacaataattaatatgcgagctcccggtatgacaatggaccgagtccctttatttgtttgatcaatttttattacaacttttttattattattatctttaccagttttagctggtgcaattacaatgttattaactgaccgtaatataaaaacttccttttttgatccaacaggaggaggagacccaatattattccaacacttgttc	9548	95.82	Ophiocten gracilis	100	BOLD	Yes	Yes	Ophiocten gracilis
753	South	75.5	30	45	0	June	02.07.2018	Bivalve	268	Anterior-posterior length	attgtcttcatacccattttctggtgcatctatagattttgtaattttctctattcatgttgctggggcttcttctattgctggagctttaaactttttaactacgggtttaaatatgcgaattaaatcaatagagttaaagcgaatacctttatttgtttgatctattattgtaactgcttttctattggtgttagcaatgcctgttttggcgggagctgttactatgcttattagggaccgtcattttaatacaactttttatgatccagcgggagggggggatcctgtattatttgtgcatctattt	5820	99.79	Hiatella sp. K	100	BOLD	Yes	Yes	Hiatella sp. K
754	South	75.5	30	45	0	June	02.07.2018	Bivalve	243	Anterior-posterior length	tctttcttcttatccattttctggggcatctatagattttgtaattttttctattcatgttgcaggtgcctcatctattgctggtgctttaaattttttaactactggacttaatatacgtattaaatctatagaattgaagcgcatgcctttgtttgtttggtcaattattgtgaccgcttttttattggttttagcaatgcctgttttagctggggctgtcactatgttaattagggatcgtcattttaatacaactttttatgatcctgctgggggaggtgatcctgtgctgtttgttcatttattt	9955	99.75	Hiatella sp. I	85.3	BOLD	Yes	Yes	Hiatella sp. I 85.3 %
755	South	75.5	30	45	0	June	02.07.2018	Bivalve	202	Anterior-posterior length	attgtcttcatacccattttctggtgcatctatagattttgtaattttctctattcatgttgctggggcttcttctattgctggagctttaaactttttaactacgggtttaaatatgcgaattaaatcaatagagttaaagcgaatacctttatttgtttgatctattattgtaactgcttttctattggtgttagcaatgcctgttttggcgggagctgttactatgcttattagggaccgtcattttaatacaactttttatgatccagcgggagggggggatcctgtattatttgtgcatctattt	36	63.89	Hiatella sp. K	100	BOLD	Yes	Yes	Insufficient reads
756	South	75.5	30	45	0	June	02.07.2018	Bivalve	220	Anterior-posterior length	attgtcttcatacccattttctggtgcatctatagattttgtaattttctctattcatgttgctggggcttcttctattgctggagctttaaactttttaactacgggtttaaatatgcgaattaaatcaatagagttaaagcgaatacctttatttgtttgatctattattgtaactgcttttctattggtgttagcaatgcctgttttggcgggagctgttactatgcttattagggaccgtcattttaatacaactttttatgatccagcgggagggggggatcctgtattatttgtgcatctattt	4102	99.59	Hiatella sp. K	100	BOLD	Yes	Yes	Hiatella sp. K
757	South	75.5	30	45	0	June	02.07.2018	Bivalve	280	Anterior-posterior length	attgtcttcatacccattttctggtgcatctatagattttgtaattttctctattcatgttgctggggcttcttctattgctggagctttaaactttttaactacgggtttaaatatgcgaattaaatcaatagagttaaagcgaatacctttatttgtttgatctattattgtaactgcttttctattggtgttagcaatgcctgttttggcgggagctgttactatgcttattagggaccgtcattttaatacaactttttatgatccagcgggagggggggatcctgtattatttgtgcatctattt	11846	99.46	Hiatella sp. K	100	BOLD	Yes	Yes	Hiatella sp. K
758	South	75.5	30	45	0	June	02.07.2018	Bivalve	278	Anterior-posterior length	tctttcaagaaatttaatagggcattctggtgctgcgggagactttttaattttatctcttcatatcggaggtgcttcatctattatagcatccttaaatttttatagaacgtgaggaaatatgcgtgcaggatgtcatcccttccatcgtgtaccccttttttgtagttctattggggtcacaaggtttcttttaattctagctatgcctgtcttagcaggggcattaacaatactgttaacagatcgcaattttaatactgctttttttgatcctaccggtttaggggaccctatattgtttgttcatttattt	196	100	Mya truncata	100	BLAST	Yes	Yes	Mya truncata
759	South	75.5	30	45	0	June	02.07.2018	Bivalve	227	Anterior-posterior length	attgtcttcatacccattttctggtgcatctatagattttgtaattttctctattcatgttgctggggcttcttctattgctggagctttaaactttttaactacgggtttaaatatgcgaattaaatcaatagagttaaagcgaatacctttatttgtttgatctattattgtaactgcttttctattggtgttagcaatgcctgttttggcgggagctgttactatgcttattagggaccgtcattttaatacaactttttatgatccagcgggagggggggatcctgtattatttgtgcatctattt	6202	99.74	Hiatella sp. K	100	BOLD	Yes	Yes	Hiatella sp. K
760	South	75.5	30	45	0	June	02.07.2018	Ophiopluteus 3	1940	Posterodorsal arm	ttatcaggtccggtagctcacgcaggtggttgtgtagatttagcaatattttctttacatttagctggtgcttcttctataatggcctcaataaattttataactacaataattaatatgcgagctcccggtatgacaatggaccgagtccctttatttgtttgatcaatttttattacaacttttttattattattatctttaccagttttagctggtgcaattacaatgttattaactgaccgtaatataaaaacttccttttttgatccaacaggaggaggagacccaatattattccaacacttgttc	8414	84.47	Ophiocten gracilis	100	BOLD	Yes	Yes	Ophiocten gracilis
761	South	75.5	30	45	0	June	02.07.2018	Ophiopluteus 3	3221	Posterodorsal arm	ttatcaggtccggtagctcacgcaggtggttgtgtagatttagcaatattttctttacatttagctggtgcttcttctataatggcctcaataaattttataactacaataattaatatgcgagctcccggtatgacaatggaccgagtccctttatttgtttgatcaatttttattacaacttttttattattattatctttaccagttttagctggtgcaattacaatgttattaactgaccgtaatataaaaacttccttttttgatccaacaggaggaggagacccaatattattccaacacttgttc	21317	95.62	Ophiocten gracilis	100	BOLD	Yes	Yes	Ophiocten gracilis
762	South	75.5	30	45	0	June	02.07.2018	Ophiopluteus 3	1850	Posterodorsal arm	ttatcaggtccggtagctcacgcaggtggttgtgtagatttagcaatattttctttacatttagctggtgcttcttctataatggcctcaataaattttataactacaataattaatatgcgagctcccggtatgacaatggaccgagtccctttatttgtttgatcaatttttattacaacttttttattattattatctttaccagttttagctggtgcaattacaatgttattaactgaccgtaatataaaaacttccttttttgatccaacaggaggaggagacccaatattattccaacacttgttc	18574	95.51	Ophiocten gracilis	100	BOLD	Yes	Yes	Ophiocten gracilis
763	South	75.5	30	45	0	June	02.07.2018	Ophiopluteus 4	835	Posterodorsal arm	actatctgggccagtcgcccatgcaggaggatgtgttgatttagctatattttctcttcatttagctggtgcatcttcgataatggcctctataaaatttattacaacaataattaatatgcgagcacctggaatgacaatggatcgaactcctttatttgtttgatcaattttaataaccacatttcttcttttattatctcttcctgttttagctggagcaattactatgttattaacagatcgaaaaattaaaacttctttttttgatccaacaggaggaggagatccaatcttattccaacatttattt	16861	90.97	Ophiura robusta	100	BOLD	Yes	Yes	Ophiura robusta
764	South	75.5	30	45	0	June	02.07.2018	Bivalve	247	Anterior-posterior length	attgtcttcatacccattttctggtgcatctatagattttgtaattttctctattcatgttgctggggcttcttctattgctggagctttaaactttttaactacgggtttaaatatgcgaattaaatcaatagagttaaagcgaatacctttatttgtttgatctattattgtaactgcttttctattggtgttagcaatgcctgttttggcgggagctgttactatgcttattagggaccgtcattttaatacaactttttatgatccagcgggagggggggatcctgtattatttgtgcatctattt	18686	99.94	Hiatella sp. K	100	BOLD	Yes	Yes	Hiatella sp. K
765	South	75.5	30	45	0	June	02.07.2018	Bivalve	278	Anterior-posterior length	attgtcttcatacccattttctggtgcatctatagattttgtaattttctctattcatgttgctggggcttcttctattgctggagctttaaactttttaactacgggtttaaatatgcgaattaaatcaatagagttaaagcgaatacctttatttgtttgatctattattgtaactgcttttctattggtgttagcaatgcctgttttggcgggagctgttactatgcttattagggaccgtcattttaatacaactttttatgatccagcgggagggggggatcctgtattatttgtgcatctattt	75	98.67	Hiatella sp. K	100	BOLD	Yes	Yes	Hiatella sp. K
766	South	75.5	30	45	0	June	02.07.2018	Ophiopluteus 1	810	Posterodorsal arm	ttatcaggtccggtagctcacgcaggtggttgtgtagatttagcaatattttctttacatttagctggtgcttcttctataatggcctcaataaattttataactacaataattaatatgcgagctcccggtatgacaatggaccgagtccctttatttgtttgatcaatttttattacaacttttttattattattatctttaccagttttagctggtgcaattacaatgttattaactgaccgtaatataaaaacttccttttttgatccaacaggaggaggagacccaatattattccaacacttgttc	7412	99.78	Ophiocten gracilis	100	BOLD	Yes	Yes	Ophiocten gracilis
767	South	75.5	30	45	0	June	02.07.2018	Synchaeta	NA	NA	tttatctgattctaagtatcattctggaatctcagtagatttagctatttttagattacatctagctggaatctcatcaattctgggtagaattaactttataactacaattatttgttcacgtactactaaaatagtaagaatagatcgtttacctctaatgctttgatcattaggagtaacggcatttctattagttactactttaccagttttagcaggtgctattacaatgttactgactgatcgtaactttaatacatcattttttgatccttctggaggaggaaaccctgtactttatcaacacctattt	15558	88.4	Synchaetidae	98.1	BOLD	No	Yes	Synchaetidae
768	South	75.5	30	45	0	June	02.07.2018	Synchaeta	NA	NA	tttatctgattctaagtatcattctggaatctcagtagatttagctatttttagattacatctagctggaatctcatcaattctgggtagaattaactttataactacaattatttgttcacgtactactaaaatagtaagaatagatcgtttacctctaatgctttgatcattaggagtaacggcatttctattagttactactttaccagttttagcaggtgctattacaatgttactgactgatcgtaactttaatacatcattttttgatccttctggaggaggaaaccctgtactttatcaacacctattt	14705	89.24	Synchaetidae	98.1	BOLD	No	Yes	Synchaetidae
769	South	75.5	30	45	0	June	02.07.2018	Pectinaria	NA	NA	ctatcaagaaacctagcccatgcaggcccttcagtggaccttgctattttttccttacatttagcaggtatttcctcaattctaggggcaattaattttattacaactgttatcaatatacggtcaaaaggactacggttagaacgtattcccttattcgtatgatctgtaaaaattaccgctatcctccttcttctatctttacctgtcctcgctggtgcaattaccatactactgacagaccgtaatctaaacacctctttctttgaccctgccgggggaggagatcctattctttaccaacacttgttc	13852	94.15	Pectinaria hyperborea	100	BOLD	Yes	Yes	Pectinaria hyperborea
770	South	75.5	30	45	0	June	02.07.2018	Synchaeta	NA	NA	tttatctgattctaagtatcattctggaatctcagtagatttagctatttttagattacatctagctggaatctcatcaattctgggtagaattaactttataactacaattatttgttcacgtactactaaaatagtaagaatagatcgtttacctctaatgctttgatcattaggagtaacggcatttctattagttactactttaccagttttagcaggtgctattacaatgttactgactgatcgtaactttaatacatcattttttgatccttctggaggaggaaaccctgtactttatcaacacctattt	4367	96.24	Synchaetidae	98.1	BOLD	No	Yes	Synchaetidae
771	South	75.5	30	45	0	June	02.07.2018	Ophiopluteus 4	956	Posterodorsal arm	ttatcaggtccggtagctcacgcaggtggttgtgtagatttagcaatattttctttacatttagctggtgcttcttctataatggcctcaataaattttataactacaataattaatatgcgagctcccggtatgacaatggaccgagtccctttatttgtttgatcaatttttattacaacttttttattattattatctttaccagttttagctggtgcaattacaatgttattaactgaccgtaatataaaaacttccttttttgatccaacaggaggaggagacccaatattattccaacacttgttc	5374	96.99	Ophiocten gracilis	100	BOLD	Yes	Yes	Ophiocten gracilis
772	South	75.5	30	45	0	June	02.07.2018	Bivalve	200	Anterior-posterior length	attatctggacctcaagcacattctggaggatcagtagatttagctattttcagtttacacactgcaggagcttcatctataatgggagctattaactttataactactatttttaatatgagagcacctggaatgactatggataaattaccattgtttgtttgatcagtattaataacagcattcttattattgttatctttacctgtactagcaggagctataacaatgctattaacagatagaaactttaatacaagtttctttgacccagcaggtggaggagatcctattctttatcaacatttattt	71	29.58	Nanomia cara	100	BOLD	No	No	Insufficient reads
773	South	75.5	30	45	0	June	02.07.2018	Synchaeta	NA	NA	attatctggacctcaagcacattctggaggatcagtagatttagctattttcagtttacacactgcaggagcttcatctataatgggagctattaactttataactactatttttaatatgagagcacctggaatgactatggataaattaccattgtttgtttgatcagtattaataacagcattcttattattgttatctttacctgtactagcaggagctataacaatgctattaacagatagaaactttaatacaagtttctttgacccagcaggtggaggagatcctattctttatcaacatttattt	90	66.67	Nanomia cara	100	BOLD	No	No	Insufficient reads
774	South	75.5	30	45	0	June	02.07.2018	Ophiopluteus 3	1369	Posterodorsal arm	ttatcaggtccggtagctcacgcaggtggttgtgtagatttagcaatattttctttacatttagctggtgcttcttctataatggcctcaataaattttataactacaataattaatatgcgagctcccggtatgacaatggaccgagtccctttatttgtttgatcaatttttattacaacttttttattattattatctttaccagttttagctggtgcaattacaatgttattaactgaccgtaatataaaaacttccttttttgatccaacaggaggaggagacccaatattattccaacacttgttc	14478	88.66	Ophiocten gracilis	100	BOLD	Yes	Yes	Ophiocten gracilis
775	South	75.5	30	45	0	June	02.07.2018	Ophiopluteus 4	1012	Posterodorsal arm	ttatcaggtccggtagctcacgcaggtggttgtgtagatttagcaatattttctttacatttagctggtgcttcttctataatggcctcaataaattttataactacaataattaatatgcgagctcccggtatgacaatggaccgagtccctttatttgtttgatcaatttttattacaacttttttattattattatctttaccagttttagctggtgcaattacaatgttattaactgaccgtaatataaaaacttccttttttgatccaacaggaggaggagacccaatattattccaacacttgttc	2421	79.26	Ophiocten gracilis	100	BOLD	Yes	Yes	Ophiocten gracilis
776	South	76	31.223	310	30	August	09.08.2018	Bivalve	230	Anterior-posterior length	attgtcttcatacccattttctggtgcatctatagattttgtaattttctctattcatgttgctggggcttcttctattgctggagctttaaactttttaactacgggtttaaatatgcgaattaaatcaatagagttaaagcgaatacctttatttgtttgatctattattgtaactgcttttctattggtgttagcaatgcctgttttggcgggagctgttactatgcttattagggaccgtcattttaatacaactttttatgatccagcgggagggggggatcctgtattatttgtgcatctattt	3093	99.52	Hiatella sp. K	100	BOLD	Yes	Yes	Hiatella sp. K
777	South	76	31.223	310	30	August	09.08.2018	Bivalve	332	Anterior-posterior length	actatctgcttgattaggacatcccgcaccggctatagaatttataattttaggtctacatattgcaggtatgtcttctatttttgcaagaattaattttgtgacaacaggtgctaacatacgtcctgagggggtggcacctcagcgcactactttatttgtagtgtctgtcattattacatcatttttactagtggtggcaatacccgtgttggctgctgggttaactatgcttttaactgatcgaaattttaatacttcttttttcgatcccgtcggaggaggggatcctgtcttatttattcatctcttt	63	100	Macoma calcarea	100	BLAST	Yes	Yes	Macoma calcarea
778	South	76	31.223	310	30	August	09.08.2018	Bivalve	234	Anterior-posterior length	actatctgcttgattaggacatcccgcaccggctatagaatttataattttaggtctacatattgcaggtatgtcttctatttttgcaagaattaattttgtgacaacaggtgctaacatacgtcctgagggggtggcacctcagcgcactactttatttgtagtgtctgtcattattacatcatttttactagtggtggcaatacccgtgttggctgctgggttaactatgcttttaactgatcgaaattttaatacttcttttttcgatcccgtcggaggaggggatcctgtcttatttattcatctcttt	2322	98.88	Macoma calcarea	100	BLAST	Yes	Yes	Macoma calcarea
779	South	76	31.223	310	30	August	09.08.2018	Bivalve	277	Anterior-posterior length	attgtcttcatacccattttctggtgcatctatagattttgtaattttctctattcatgttgctggggcttcttctattgctggagctttaaactttttaactacgggtttaaatatgcgaattaaatcaatagagttaaagcgaatacctttatttgtttgatctattattgtaactgcttttctattggtgttagcaatgcctgttttggcgggagctgttactatgcttattagggaccgtcattttaatacaactttttatgatccagcgggagggggggatcctgtattatttgtgcatctattt	256	100	Hiatella sp. K	100	BOLD	Yes	Yes	Hiatella sp. K
780	South	76	31.223	310	30	August	09.08.2018	Bivalve	269	Anterior-posterior length	gttaacatcaattgaatttttaagggacccttcaatagatatagctattttttcactacatcttggcggtgtttcttctattgcggcgagtttaaatttcgcgaggacatgtgttaatatgcggcaagagggccggggcctacataaaattcctatatttccaatttccctggggatcactgctttacttttaattatcgctatgccggtgttggcgggggccctaactatactattattggatcgaaattttgcaactaggttttttgatccggtgggagggggtgatccaattttgtttatacatctattt	221	98.64	Ciliatocardium ciliatum	100	BLAST	Yes	Yes	Ciliatocardium ciliatum
781	South	76	31.223	310	30	August	09.08.2018	Juvenile ophiuroid	NA	NA	ttatcaggtccggtagctcacgcaggtggttgtgtagatttagcaatattttctttacatttagctggtgcttcttctataatggcctcaataaattttataactacaataattaatatgcgagctcccggtatgacaatggaccgagtccctttatttgtttgatcaatttttattacaacttttttattattattatctttaccagttttagctggtgcaattacaatgttattaactgaccgtaatataaaaacttccttttttgatccaacaggaggaggagacccaatattattccaacacttgttc	6513	98.93	Ophiocten gracilis	100	BOLD	Yes	Yes	Ophiocten gracilis
782	South	76	31.223	310	30	August	09.08.2018	Bivalve	352	Anterior-posterior length	attgtcttcatacccattttctggtgcatctatagattttgtaattttctctattcatgttgctggggcttcttctattgctggagctttaaactttttaactacgggtttaaatatgcgaattaaatcaatagagttaaagcgaatacctttatttgtttgatctattattgtaactgcttttctattggtgttagcaatgcctgttttggcgggagctgttactatgcttattagggaccgtcattttaatacaactttttatgatccagcgggagggggggatcctgtattatttgtgcatctattt	2728	99.71	Hiatella sp. K	100	BOLD	Yes	Yes	Hiatella sp. K
783	South	76	31.223	310	30	August	09.08.2018	Bivalve	295	Anterior-posterior length	tctttcaagaaatttaatagggcattctggtgctgcgggagactttttaattttatctcttcatatcggaggtgcttcatctattatagcatccttaaatttttatagaacgtgaggaaatatgcgtgcaggatgtcatcccttccatcgtgtaccccttttttgtagttctattggggtcacaaggtttcttttaattctagctatgcctgtcttagcaggggcattaacaatactgttaacagatcgcaattttaatactgctttttttgatcctaccggtttaggggaccctatattgtttgttcatttattt	16	100	Mya truncata	100	BLAST	Yes	Yes	Mya truncata
784	South	76	31.223	310	30	August	09.08.2018	Bivalve	268	Anterior-posterior length	actatctgcttgattaggacatcccgcaccggctatagaatttataattttaggtctacatattgcaggtatgtcttctatttttgcaagaattaattttgtgacaacaggtgctaacatacgtcctgagggggtggcacctcagcgcactactttatttgtagtgtctgtcattattacatcatttttactagtggtggcaatacccgtgttggctgctgggttaactatgcttttaactgatcgaaattttaatacttcttttttcgatcccgtcggaggaggggatcctgtcttatttattcatctcttt	12091	99.29	Macoma calcarea	100	BLAST	Yes	Yes	Macoma calcarea
785	South	76	31.223	310	30	August	09.08.2018	Juvenile ophiuroid	NA	NA	ttatcaggtccggtagctcacgcaggtggttgtgtagatttagcaatattttctttacatttagctggtgcttcttctataatggcctcaataaattttataactacaataattaatatgcgagctcccggtatgacaatggaccgagtccctttatttgtttgatcaatttttattacaacttttttattattattatctttaccagttttagctggtgcaattacaatgttattaactgaccgtaatataaaaacttccttttttgatccaacaggaggaggagacccaatattattccaacacttgttc	17519	95.42	Ophiocten gracilis	100	BOLD	Yes	Yes	Ophiocten gracilis
786	South	76	31.223	310	30	August	09.08.2018	Mitraria	NA	NA	actctctggtaatgtctctcatgccggggggtctgtagatttagctattttttctttacacttagcaggtgcatcttcgattttaggtgctgttaatttcatgtgcacagtaataaatatacgatctgatgatgctgaatttgaacaaacacctttatttgtggtggctatttacttaacagtattacttctgcttttatctctacctgtactagcaggggggatcactatattgttaacagatcgaaattttaatactagattttttgacccagcaggtgggggtgacccagtgctttttgctcatttgttt	1868	98.88	Galathowenia oculata	100	BOLD	Yes	Yes	Galathowenia oculata
787	South	76	31.223	310	30	August	09.08.2018	Bivalve	295	Anterior-posterior length	actatctgcttgattaggacatcccgcaccggctatagaatttataattttaggtctacatattgcaggtatgtcttctatttttgcaagaattaattttgtgacaacaggtgctaacatacgtcctgagggggtggcacctcagcgcactactttatttgtagtgtctgtcattattacatcatttttactagtggtggcaatacccgtgttggctgctgggttaactatgcttttaactgatcgaaattttaatacttcttttttcgatcccgtcggaggaggggatcctgtcttatttattcatctcttt	364	96.98	Macoma calcarea	100	BLAST	Yes	Yes	Macoma calcarea
788	South	76	31.223	310	30	August	09.08.2018	Bivalve	348	Anterior-posterior length	actatctgcttgattaggacatcccgcaccggctatagaatttataattttaggtctacatattgcaggtatgtcttctatttttgcaagaattaattttgtgacaacaggtgctaacatacgtcctgagggggtggcacctcagcgcactactttatttgtagtgtctgtcattattacatcatttttactagtggtggcaatacccgtgttggctgctgggttaactatgcttttaactgatcgaaattttaatacttcttttttcgatcccgtcggaggaggggatcctgtcttatttattcatctcttt	6623	99.14	Macoma calcarea	100	BLAST	Yes	Yes	Macoma calcarea
789	South	76	31.223	310	30	August	09.08.2018	Bivalve	238	Anterior-posterior length	attgtcttcatacccattttctggtgcatctatagattttgtaattttctctattcatgttgctggggcttcttctattgctggagctttaaactttttaactacgggtttaaatatgcgaattaaatcaatagagttaaagcgaatacctttatttgtttgatctattattgtaactgcttttctattggtgttagcaatgcctgttttggcgggagctgttactatgcttattagggaccgtcattttaatacaactttttatgatccagcgggagggggggatcctgtattatttgtgcatctattt	12435	99.3	Hiatella sp. K	100	BOLD	Yes	Yes	Hiatella sp. K
790	South	76	31.223	310	30	August	09.08.2018	Juvenile ophiuroid	NA	NA	ttatcaggtccggtagctcacgcaggtggttgtgtagatttagcaatattttctttacatttagctggtgcttcttctataatggcctcaataaattttataactacaataattaatatgcgagctcccggtatgacaatggaccgagtccctttatttgtttgatcaatttttattacaacttttttattattattatctttaccagttttagctggtgcaattacaatgttattaactgaccgtaatataaaaacttccttttttgatccaacaggaggaggagacccaatattattccaacacttgttc	11681	99.32	Ophiocten gracilis	100	BOLD	Yes	Yes	Ophiocten gracilis
791	South	76	31.223	310	30	August	09.08.2018	Bivalve	298	Anterior-posterior length	attgtcttcatacccattttctggtgcatctatagattttgtaattttctctattcatgttgctggggcttcttctattgctggagctttaaactttttaactacgggtttaaatatgcgaattaaatcaatagagttaaagcgaatacctttatttgtttgatctattattgtaactgcttttctattggtgttagcaatgcctgttttggcgggagctgttactatgcttattagggaccgtcattttaatacaactttttatgatccagcgggagggggggatcctgtattatttgtgcatctattt	5774	99.36	Hiatella sp. K	100	BOLD	Yes	Yes	Hiatella sp. K
792	South	76	31.223	310	30	August	09.08.2018	Bivalve	297	Anterior-posterior length	actatctgcttgattaggacatcccgcaccggctatagaatttataattttaggtctacatattgcaggtatgtcttctatttttgcaagaattaattttgtgacaacaggtgctaacatacgtcctgagggggtggcacctcagcgcactactttatttgtagtgtctgtcattattacatcatttttactagtggtggcaatacccgtgttggctgctgggttaactatgcttttaactgatcgaaattttaatacttcttttttcgatcccgtcggaggaggggatcctgtcttatttattcatctcttt	5400	99	Macoma calcarea	100	BLAST	Yes	Yes	Macoma calcarea
793	South	76	31.223	310	30	August	09.08.2018	Bivalve	348	Anterior-posterior length	attgtcttcatacccattttctggtgcatctatagattttgtaattttctctattcatgttgctggggcttcttctattgctggagctttaaactttttaactacgggtttaaatatgcgaattaaatcaatagagttaaagcgaatacctttatttgtttgatctattattgtaactgcttttctattggtgttagcaatgcctgttttggcgggagctgttactatgcttattagggaccgtcattttaatacaactttttatgatccagcgggagggggggatcctgtattatttgtgcatctattt	651	98.77	Hiatella sp. K	100	BOLD	Yes	Yes	Hiatella sp. K
794	South	76	31.223	310	30	August	09.08.2018	Bivalve	332	Anterior-posterior length	actatctgcttgattaggacatcccgcaccggctatagaatttataattttaggtctacatattgcaggtatgtcttctatttttgcaagaattaattttgtgacaacaggtgctaacatacgtcctgagggggtggcacctcagcgcactactttatttgtagtgtctgtcattattacatcatttttactagtggtggcaatacccgtgttggctgctgggttaactatgcttttaactgatcgaaattttaatacttcttttttcgatcccgtcggaggaggggatcctgtcttatttattcatctcttt	3400	99.18	Macoma calcarea	100	BLAST	Yes	Yes	Macoma calcarea
795	South	76	31.223	310	30	August	09.08.2018	Ophiopluteus normal	717	Posterodorsal arm	attatccggaccagttgctcacgccggtggctgtgttgatttagctatattttccctccacttagctggtgcttcgtcaataatggcatcaattaactttattactacaattattaatatgcgagcgccaggtatgacaatggatcgaacccctttatttgtttgatcgattctaattacaacatttcttttattactctcattacctgttctagccggagccattaccatgttattaacagaccggaaaattaaaacatctttcttcgacccaacgggaggaggggaccctattttgttccaacacctattt	91	98.9	Ophiura sarsii	100	BOLD	Yes	Yes	Ophiura sarsii
796	South	76	31.223	310	30	August	09.08.2018	Bivalve	311	Anterior-posterior length	attgtcttcatacccattttctggtgcatctatagattttgtaattttctctattcatgttgctggggcttcttctattgctggagctttaaactttttaactacgggtttaaatatgcgaattaaatcaatagagttaaagcgaatacctttatttgtttgatctattattgtaactgcttttctattggtgttagcaatgcctgttttggcgggagctgttactatgcttattagggaccgtcattttaatacaactttttatgatccagcgggagggggggatcctgtattatttgtgcatctattt	1380	98.62	Hiatella sp. K	100	BOLD	Yes	Yes	Hiatella sp. K
797	South	76	31.223	310	30	August	09.08.2018	Limacina	NA	NA	attaagtaatataggtcacataactcaaagagtagatttttgtattttttcattacatttagcaggtttatcatcaattattggggcaatcaacataattacaacaattatagtaagacgttcaaaaataataacactatctcgaataagattatatttatgaagaatattaattactttaattttattattactatccttacctgtacttgcaggtgctatcacaatactattactagatcgtaattttaacactacattttttgatcctgtaggaggaggtgatccaatcttatttcaacatctattt	2150	98.33	Limacina helicina	100	BOLD	No	Yes	Limacina helicina
798	South	76	31.223	310	30	August	09.08.2018	Mitraria	NA	NA	actctctggtaatgtctctcatgccggggggtctgtagatttagctattttttctttacacttagcaggtgcatcttcgattttaggtgctgttaatttcatgtgcacagtaataaatatacgatctgatgatgctgaatttgaacaaacacctttatttgtggtggctatttacttaacagtattacttctgcttttatctctacctgtactagcaggggggatcactatattgttaacagatcgaaattttaatactagattttttgacccagcaggtgggggtgacccagtgctttttgctcatttgttt	5473	99.45	Galathowenia oculata	100	BOLD	Yes	Yes	Galathowenia oculata
799	South	76	31.223	310	30	August	09.08.2018	Bivalve	292	Anterior-posterior length	attgtcttcatacccattttctggtgcatctatagattttgtaattttctctattcatgttgctggggcttcttctattgctggagctttaaactttttaactacgggtttaaatatgcgaattaaatcaatagagttaaagcgaatacctttatttgtttgatctattattgtaactgcttttctattggtgttagcaatgcctgttttggcgggagctgttactatgcttattagggaccgtcattttaatacaactttttatgatccagcgggagggggggatcctgtattatttgtgcatctattt	10491	99.08	Hiatella sp. K	100	BOLD	Yes	Yes	Hiatella sp. K
800	South	76	31.223	310	30	August	09.08.2018	Bivalve	256	Anterior-posterior length	actatctgcttgattaggacatcccgcaccggctatagaatttataattttaggtctacatattgcaggtatgtcttctatttttgcaagaattaattttgtgacaacaggtgctaacatacgtcctgagggggtggcacctcagcgcactactttatttgtagtgtctgtcattattacatcatttttactagtggtggcaatacccgtgttggctgctgggttaactatgcttttaactgatcgaaattttaatacttcttttttcgatcccgtcggaggaggggatcctgtcttatttattcatctcttt	7	85.71	Macoma calcarea	100	BLAST	Yes	Yes	Insufficient reads
801	South	76	31.223	310	30	August	09.08.2018	Bivalve	363	Anterior-posterior length	attgtcttcatacccattttctggtgcatctatagattttgtaattttctctattcatgttgctggggcttcttctattgctggagctttaaactttttaactacgggtttaaatatgcgaattaaatcaatagagttaaagcgaatacctttatttgtttgatctattattgtaactgcttttctattggtgttagcaatgcctgttttggcgggagctgttactatgcttattagggaccgtcattttaatacaactttttatgatccagcgggagggggggatcctgtattatttgtgcatctattt	4150	99.2	Hiatella sp. K	100	BOLD	Yes	Yes	Hiatella sp. K
802	South	76	31.223	310	30	August	09.08.2018	Bivalve	288	Anterior-posterior length	gttaacatcaattgaatttttaagggacccttcaatagatatagctattttttcactacatcttggcggtgtttcttctattgcggcgagtttaaatttcgcgaggacatgtgttaatatgcggcaagagggccggggcctacataaaattcctatatttccaatttccctggggatcactgctttacttttaattatcgctatgccggtgttggcgggggccctaactatactattattggatcgaaattttgcaactaggttttttgatccggtgggagggggtgatccaattttgtttatacatctattt	7262	99.37	Ciliatocardium ciliatum	100	BLAST	Yes	Yes	Ciliatocardium ciliatum
803	South	76	31.223	310	30	August	09.08.2018	Bivalve	281	Anterior-posterior length	actatctgcttgattaggacatcccgcaccggctatagaatttataattttaggtctacatattgcaggtatgtcttctatttttgcaagaattaattttgtgacaacaggtgctaacatacgtcctgagggggtggcacctcagcgcactactttatttgtagtgtctgtcattattacatcatttttactagtggtggcaatacccgtgttggctgctgggttaactatgcttttaactgatcgaaattttaatacttcttttttcgatcccgtcggaggaggggatcctgtcttatttattcatctcttt	13953	99.46	Macoma calcarea	100	BLAST	Yes	Yes	Macoma calcarea
804	South	76	31.223	310	30	August	09.08.2018	Bivalve	335	Anterior-posterior length	gttaacatcaattgaatttttaagggacccttcaatagatatagctattttttcactacatcttggcggtgtttcttctattgcggcgagtttaaatttcgcgaggacatgtgttaatatgcggcaagagggccggggcctacataaaattcctatatttccaatttccctggggatcactgctttacttttaattatcgctatgccggtgttggcgggggccctaactatactattattggatcgaaattttgcaactaggttttttgatccggtgggagggggtgatccaattttgtttatacatctattt	3324	98.59	Ciliatocardium ciliatum	100	BLAST	Yes	Yes	Ciliatocardium ciliatum
805	South	76	31.223	310	30	August	09.08.2018	Bivalve	286	Anterior-posterior length	gttaacatcaattgaatttttaagggacccttcaatagatatagctattttttcactacatcttggcggtgtttcttctattgcggcgagtttaaatttcgcgaggacatgtgttaatatgcggcaagagggccggggcctacataaaattcctatatttccaatttccctggggatcactgctttacttttaattatcgctatgccggtgttggcgggggccctaactatactattattggatcgaaattttgcaactaggttttttgatccggtgggagggggtgatccaattttgtttatacatctattt	14191	99.53	Ciliatocardium ciliatum	100	BLAST	Yes	Yes	Ciliatocardium ciliatum
806	South	76	31.223	310	30	August	09.08.2018	Bivalve	353	Anterior-posterior length	actatctgcttgattaggacatcccgcaccggctatagaatttataattttaggtctacatattgcaggtatgtcttctatttttgcaagaattaattttgtgacaacaggtgctaacatacgtcctgagggggtggcacctcagcgcactactttatttgtagtgtctgtcattattacatcatttttactagtggtggcaatacccgtgttggctgctgggttaactatgcttttaactgatcgaaattttaatacttcttttttcgatcccgtcggaggaggggatcctgtcttatttattcatctcttt	825	100	Macoma calcarea	100	BLAST	Yes	Yes	Macoma calcarea
808	South	76	31.223	310	30	August	09.08.2018	Bivalve	265	Anterior-posterior length	attaagcacttctttcatgagcttatcaccttcaagtacaggaaatcttatctttggtttattaatctctggtatatcctcatgtctcacatctcttaatttctatacaacaattctaaatctgagatcttattatctgaatttaaagactatgccattattcccttgggctctcttcattacaggaggaatgcttttattaacattaccaatcttatcaggagctcttctaatggtcttggctgatcttcattctaatacacttttctttgaaccaatctttggaggagatcctatattctatcaacacttattt	4	50	Thoracosphaera heimii	96.8	BLAST	No	No	Insufficient reads
809	South	76	31.223	310	30	August	09.08.2018	Bivalve	301	Anterior-posterior length	attgtcttcatacccattttctggtgcatctatagattttgtaattttctctattcatgttgctggggcttcttctattgctggagctttaaactttttaactacgggtttaaatatgcgaattaaatcaatagagttaaagcgaatacctttatttgtttgatctattattgtaactgcttttctattggtgttagcaatgcctgttttggcgggagctgttactatgcttattagggaccgtcattttaatacaactttttatgatccagcgggagggggggatcctgtattatttgtgcatctattt	13503	99.9	Hiatella sp. K	100	BOLD	Yes	Yes	Hiatella sp. K
810	South	76	31.223	310	30	August	09.08.2018	Bivalve	199	Anterior-posterior length	attgtcttcatacccattttctggtgcatctatagattttgtaattttctctattcatgttgctggggcttcttctattgctggagctttaaactttttaactacgggtttaaatatgcgaattaaatcaatagagttaaagcgaatacctttatttgtttgatctattattgtaactgcttttctattggtgttagcaatgcctgttttggcgggagctgttactatgcttattagggaccgtcattttaatacaactttttatgatccagcgggagggggggatcctgtattatttgtgcatctattt	3470	99.77	Hiatella sp. K	100	BOLD	Yes	Yes	Hiatella sp. K
811	South	76	31.223	310	30	August	09.08.2018	Bivalve	342	Anterior-posterior length	attgtcttcatacccattttctggtgcatctatagattttgtaattttctctattcatgttgctggggcttcttctattgctggagctttaaactttttaactacgggtttaaatatgcgaattaaatcaatagagttaaagcgaatacctttatttgtttgatctattattgtaactgcttttctattggtgttagcaatgcctgttttggcgggagctgttactatgcttattagggaccgtcattttaatacaactttttatgatccagcgggagggggggatcctgtattatttgtgcatctattt	4124	99.9	Hiatella sp. K	100	BOLD	Yes	Yes	Hiatella sp. K
812	South	76	31.223	310	30	August	09.08.2018	Bivalve	223	Anterior-posterior length	attgtcttcatacccattttctggtgcatctatagattttgtaattttctctattcatgttgctggggcttcttctattgctggagctttaaactttttaactacgggtttaaatatgcgaattaaatcaatagagttaaagcgaatacctttatttgtttgatctattattgtaactgcttttctattggtgttagcaatgcctgttttggcgggagctgttactatgcttattagggaccgtcattttaatacaactttttatgatccagcgggagggggggatcctgtattatttgtgcatctattt	2302	99.96	Hiatella sp. K	100	BOLD	Yes	Yes	Hiatella sp. K
813	South	76	31.223	310	30	August	09.08.2018	Bivalve	275	Anterior-posterior length	attgtcttcatacccattttctggtgcatctatagattttgtaattttctctattcatgttgctggggcttcttctattgctggagctttaaactttttaactacgggtttaaatatgcgaattaaatcaatagagttaaagcgaatacctttatttgtttgatctattattgtaactgcttttctattggtgttagcaatgcctgttttggcgggagctgttactatgcttattagggaccgtcattttaatacaactttttatgatccagcgggagggggggatcctgtattatttgtgcatctattt	7803	98.9	Hiatella sp. K	100	BOLD	Yes	Yes	Hiatella sp. K
814	South	76	31.223	310	30	August	09.08.2018	Limacina	NA	NA	cttgagaagtgcaggtcatgtaacacaaagtgttgatttttgtattttttctctacatttagcaggactttcttcaatcattggagcaatcaatataattacaacaattctaattagtcgacgggtaagactatctcgaataagtttatacttatgaagcatactcatcacattaattttacttttattatcattaccggttttagcaggtgcaattactatactgttaatagaccgtaattttaatacaactttttttgatcctgtaggagggggtgatcctgtattatttcaacatttattt	10038	99.84	Limacina retroversa	96.9	BOLD	No	Yes	Limacina retroversa 96.9 %
815	South	76	31.223	310	30	August	09.08.2018	Unknown blob eyes	NA	NA	ttattcctcttttccagcttcttccttcttatctactgatttaattattttttctttacatttggctggtgcttcttctattttatcttctattaattttattgttactgtttatattttacctttaaattcctttttatctttttttcaatatcctttgtttattgttgctcaattgactgttagttttttattattaatttctttgcccgttttagctgctgctattactatgttattatttgatcgtaatttttcaacttccttcttttctaactatctaggtggtgatgcccttttatatcaacatttattt	142	24.65	No match	0	No match	No match	No	Insufficient reads
816	South	76	31.223	310	30	August	09.08.2018	Unknown blob eyes	NA	NA	tcttgctggaaatctagctcatgctggaggttcagtagatttagctattttttctttacatttggctggagcttcttcaattttaggtgctattaattttatcacaactattattaatatgcgttgacgaggaatacattttgagcgtttacctttatttgtgtgatctgttaaaattactgcagtattattattattatctttacctgttttagctggggcaattactatattattaactgaccgtaattttaatactgctttttttgatcctgcaggaggtggagaccctattttatatcagcatttattt	548	28.65	Cephalothrix iwatai	99	BOLD	Yes	Yes	Insufficient reads
817	South	76	31.223	310	30	August	09.08.2018	Mitraria	NA	NA	actctctggtaatgtctctcatgccggggggtctgtagatttagctattttttctttacacttagcaggtgcatcttcgattttaggtgctgttaatttcatgtgcacagtaataaatatacgatctgatgatgctgaatttgaacaaacacctttatttgtggtggctatttacttaacagtattacttctgcttttatctctacctgtactagcaggggggatcactatattgttaacagatcgaaattttaatactagattttttgacccagcaggtgggggtgacccagtgctttttgctcatttgttt	13403	98.16	Galathowenia oculata	100	BOLD	Yes	Yes	Galathowenia oculata
818	South	76	31.223	310	30	August	09.08.2018	Unknown blob eyes	NA	NA	attatctggtgttcaagctcattctggggcttccgtcgattgtgctatttactcgttacatctagcgggtatttcatccattttgggcgctattaactttatcgttacaatcaccaatatgcgagcgccaggtatgacagcaaatagaacgccgctattcgtgtgagcagtttttatcactgcttttttattgttattgtcgctgcccgttttagcgggtgctattacaatgttacttgcagaccgtaattttaatacaagcttttttgaccctaatggcggcggggaccctgttctctatcaacaccttttc	492	67.68	Chrysochromulina throndsenii	77.7	BOLD	No	No	Insufficient reads
819	South	76	31.223	310	30	August	09.08.2018	Juvenile ophiuroid	NA	NA	ttatcaggtccggtagctcacgcaggtggttgtgtagatttagcaatattttctttacatttagctggtgcttcttctataatggcctcaataaattttataactacaataattaatatgcgagctcccggtatgacaatggaccgagtccctttatttgtttgatcaatttttattacaacttttttattattattatctttaccagttttagctggtgcaattacaatgttattaactgaccgtaatataaaaacttccttttttgatccaacaggaggaggagacccaatattattccaacacttgttc	9251	99.5	Ophiocten gracilis	100	BOLD	Yes	Yes	Ophiocten gracilis
820	South	76	31.223	310	30	August	09.08.2018	Juvenile ophiuroid	NA	NA	attatccggaccagttgctcacgccggtggctgtgttgatttagctatattttccctccacttagctggtgcttcgtcaataatggcatcaattaactttattactacaattattaatatgcgagcgccaggtatgacaatggatcgaacccctttatttgtttgatcgattctaattacaacatttcttttattactctcattacctgttctagccggagccattaccatgttattaacagaccggaaaattaaaacatctttcttcgacccaacgggaggaggggaccctattttgttccaacacctattt	14810	99.17	Ophiura sarsii	100	BOLD	Yes	Yes	Ophiura sarsii
821	South	76	31.223	310	30	August	09.08.2018	Juvenile ophiuroid	NA	NA	actatctgggccagtcgcccatgcaggaggatgtgttgatttagctatattttctcttcatttagctggtgcatcttcgataatggcctctataaaatttattacaacaataattaatatgcgagcacctggaatgacaatggatcgaactcctttatttgtttgatcaattttaataaccacatttcttcttttattatctcttcctgttttagctggagcaattactatgttattaacagatcgaaaaattaaaacttctttttttgatccaacaggaggaggagatccaatcttattccaacatttattt	11105	99.5	Ophiura robusta	100	BOLD	Yes	Yes	Ophiura robusta
822	South	76	31.223	310	30	August	09.08.2018	Unknown blob eyes	NA	NA	tctttcaagaaatattgcacacgcagggggctcagtagattttgctattttttctctacatttggccggggtgagatcaattttaggggcagttaattttattaggactttaggaaacctgcgagtctttggtatattactggaccggataccattattcgcatggtctgtcttagtcactgcggtgctgctattgctctctatgccagtactcgctggcgcgattactatgcttctaacagaccgaaatttaaacacgtcgttttatgatgtgggagggggtggagaccctatcttataccaacatcttttt	539	48.61	Microcalanus pusillus	100	BOLD	No	No	Insufficient reads
823	South	76	31.223	310	30	August	09.08.2018	Ophiopluteus normal	624	Posterodorsal arm	attatccggaccagttgctcacgccggtggctgtgttgatttagctatattttccctccacttagctggtgcttcgtcaataatggcatcaattaactttattactacaattattaatatgcgagcgccaggtatgacaatggatcgaacccctttatttgtttgatcgattctaattacaacatttcttttattactctcattacctgttctagccggagccattaccatgttattaacagaccggaaaattaaaacatctttcttcgacccaacgggaggaggggaccctattttgttccaacacctattt	10106	99.35	Ophiura sarsii	100	BOLD	Yes	Yes	Ophiura sarsii
824	South	76	31.223	310	30	August	09.08.2018	Juvenile ophiuroid	NA	NA	ttatcaggtccggtagctcacgcaggtggttgtgtagatttagcaatattttctttacatttagctggtgcttcttctataatggcctcaataaattttataactacaataattaatatgcgagctcccggtatgacaatggaccgagtccctttatttgtttgatcaatttttattacaacttttttattattattatctttaccagttttagctggtgcaattacaatgttattaactgaccgtaatataaaaacttccttttttgatccaacaggaggaggagacccaatattattccaacacttgttc	10757	91.47	Ophiocten gracilis	100	BOLD	Yes	Yes	Ophiocten gracilis
825	South	76	31.223	310	30	August	09.08.2018	Mitraria	NA	NA	actctctggtaatgtctctcatgccggggggtctgtagatttagctattttttctttacacttagcaggtgcatcttcgattttaggtgctgttaatttcatgtgcacagtaataaatatacgatctgatgatgctgaatttgaacaaacacctttatttgtggtggctatttacttaacagtattacttctgcttttatctctacctgtactagcaggggggatcactatattgttaacagatcgaaattttaatactagattttttgacccagcaggtgggggtgacccagtgctttttgctcatttgttt	9662	98.95	Galathowenia oculata	100	BOLD	Yes	Yes	Galathowenia oculata
826	South	76	31.223	310	30	August	09.08.2018	Limacina	NA	NA	attaagtaatataggtcacataactcaaagagtagatttttgtattttttcattacatttagcaggtttatcatcaattattggggcaatcaacataattacaacaattatagtaagacgttcaaaaataataacactatctcgaataagattatatttatgaagaatattaattactttaattttattattactatccttacctgtacttgcaggtgctatcacaatactattactagatcgtaattttaacactacattttttgatcctgtaggaggaggtgatccaatcttatttcaacatctattt	161	94.41	Limacina helicina	100	BOLD	No	Yes	Limacina helicina
827	South	76	31.223	310	30	August	09.08.2018	Unknown blob eyes	NA	NA	tttagcaagtgcccaagctcattcgggaccgtctgtagacttagcaatttttagtttgcatctatctggggcatcgtctattttgggggcagtaaattttatcacgactatttttaacatgcggatgcctggtttaactttatctaaactgccattgtttgtctggtctgttttaattactgctttcttgcttttattatcgttacctgtcttagcgggagctattaccatgttattgacagatagaaatttcaatacgactttttttgatcctgctggtggtggtgatcccgttttataccaacatctattt	192	11.46	No match	0	No match	No match	No	Insufficient reads
828	South	76	31.223	310	30	August	09.08.2018	Juvenile ophiuroid	NA	NA	ttatcaggtccggtagctcacgcaggtggttgtgtagatttagcaatattttctttacatttagctggtgcttcttctataatggcctcaataaattttataactacaataattaatatgcgagctcccggtatgacaatggaccgagtccctttatttgtttgatcaatttttattacaacttttttattattattatctttaccagttttagctggtgcaattacaatgttattaactgaccgtaatataaaaacttccttttttgatccaacaggaggaggagacccaatattattccaacacttgttc	18007	99.8	Ophiocten gracilis	100	BOLD	Yes	Yes	Ophiocten gracilis
829	South	76	31.223	310	30	August	09.08.2018	Mitraria	NA	NA	actctctggtaatgtctctcatgccggggggtctgtagatttagctattttttctttacacttagcaggtgcatcttcgattttaggtgctgttaatttcatgtgcacagtaataaatatacgatctgatgatgctgaatttgaacaaacacctttatttgtggtggctatttacttaacagtattacttctgcttttatctctacctgtactagcaggggggatcactatattgttaacagatcgaaattttaatactagattttttgacccagcaggtgggggtgacccagtgctttttgctcatttgttt	15190	99.81	Galathowenia oculata	100	BOLD	Yes	Yes	Galathowenia oculata
830	South	76	31.223	310	30	August	09.08.2018	Juvenile ophiuroid	NA	NA	ttatcaggtccggtagctcacgcaggtggttgtgtagatttagcaatattttctttacatttagctggtgcttcttctataatggcctcaataaattttataactacaataattaatatgcgagctcccggtatgacaatggaccgagtccctttatttgtttgatcaatttttattacaacttttttattattattatctttaccagttttagctggtgcaattacaatgttattaactgaccgtaatataaaaacttccttttttgatccaacaggaggaggagacccaatattattccaacacttgttc	6089	99.57	Ophiocten gracilis	100	BOLD	Yes	Yes	Ophiocten gracilis
831	South	76	31.223	310	30	August	09.08.2018	Unknown blob eyes	NA	NA	tcccacaatccaccagtgctgtgttgtatgcactctcaccctcttcaacacaaacagttaattttaaatgtgtcacctagtttcaaacacagttcaaatcaaatatcatggaattaaaaacactggtttgcctttaacagtgtgatctgtccagagttttagtgaatagtttacttttacattatcagctgtagaatgacattaaatggtggagtatgttaggatctgttagggttcacctaacatcattatggattataagttaggccatgaagatgtatctatttaatttttgaagatgtttta	773	11	No match	0	No match	No match	No	Insufficient reads
832	South	76	31.223	310	30	August	09.08.2018	Mitraria	NA	NA	actctctggtaatgtctctcatgccggggggtctgtagatttagctattttttctttacacttagcaggtgcatcttcgattttaggtgctgttaatttcatgtgcacagtaataaatatacgatctgatgatgctgaatttgaacaaacacctttatttgtggtggctatttacttaacagtattacttctgcttttatctctacctgtactagcaggggggatcactatattgttaacagatcgaaattttaatactagattttttgacccagcaggtgggggtgacccagtgctttttgctcatttgttt	10064	99.86	Galathowenia oculata	100	BOLD	Yes	Yes	Galathowenia oculata
833	South	76	31.223	310	30	August	09.08.2018	Ophiopluteus normal	879	Posterodorsal arm	ttatcaggtccggtagctcacgcaggtggttgtgtagatttagcaatattttctttacatttagctggtgcttcttctataatggcctcaataaattttataactacaataattaatatgcgagctcccggtatgacaatggaccgagtccctttatttgtttgatcaatttttattacaacttttttattattattatctttaccagttttagctggtgcaattacaatgttattaactgaccgtaatataaaaacttccttttttgatccaacaggaggaggagacccaatattattccaacacttgttc	3409	94.28	Ophiocten gracilis	100	BOLD	Yes	Yes	Ophiocten gracilis
834	South	76	31.223	310	30	August	09.08.2018	Ophiopluteus normal	962	Posterodorsal arm	ttatcaggtccggtagctcacgcaggtggttgtgtagatttagcaatattttctttacatttagctggtgcttcttctataatggcctcaataaattttataactacaataattaatatgcgagctcccggtatgacaatggaccgagtccctttatttgtttgatcaatttttattacaacttttttattattattatctttaccagttttagctggtgcaattacaatgttattaactgaccgtaatataaaaacttccttttttgatccaacaggaggaggagacccaatattattccaacacttgttc	19318	99.55	Ophiocten gracilis	100	BOLD	Yes	Yes	Ophiocten gracilis
835	South	76	31.223	310	30	August	09.08.2018	Unknown blob eyes	NA	NA	tcttgctggaaatctagctcatgctggaggttcagtagatttagctattttttctttacatttggctggagcttcttcaattttaggtgctattaattttatcacaactattattaatatgcgttgacgaggaatacattttgagcgtttacctttatttgtgtgatctgttaaaattactgcagtattattattattatctttacctgttttagctggggcaattactatattattaactgaccgtaattttaatactgctttttttgatcctgcaggaggtggagaccctattttatatcagcatttattt	26849	99.7	Cephalothrix iwatai	99	BOLD	Yes	Yes	Cephalothrix iwatai
836	South	76	31.223	310	30	August	09.08.2018	Unknown blob eyes	NA	NA	attaagtacatcattaatgagtctatcacctattggaattgatattatattatgtggattattattgtcaggtatatcatcatgtttaacatctattaacttctttgctacaattataaatatgagatgttatagtatgacattatctattatgccagtatatacatggtctatatatattacaggatttctattattattaacattacctatattaacaggagctcttataatattattagcagatcttcattataatacagttttctttgatccaatatttggaggtgatcctgtactttatcaacatttattt	3697	40.82	Hematodinium	94	BLAST	No	No	Unknown
837	South	76	31.223	310	30	August	09.08.2018	Juvenile ophiuroid	NA	NA	ttatcaggtccggtagctcacgcaggtggttgtgtagatttagcaatattttctttacatttagctggtgcttcttctataatggcctcaataaattttataactacaataattaatatgcgagctcccggtatgacaatggaccgagtccctttatttgtttgatcaatttttattacaacttttttattattattatctttaccagttttagctggtgcaattacaatgttattaactgaccgtaatataaaaacttccttttttgatccaacaggaggaggagacccaatattattccaacacttgttc	16104	97.42	Ophiocten gracilis	100	BOLD	Yes	Yes	Ophiocten gracilis
838	South	76	31.223	310	30	August	09.08.2018	Juvenile ophiuroid	NA	NA	ttatcaggtccggtagctcacgcaggtggttgtgtagatttagcaatattttctttacatttagctggtgcttcttctataatggcctcaataaattttataactacaataattaatatgcgagctcccggtatgacaatggaccgagtccctttatttgtttgatcaatttttattacaacttttttattattattatctttaccagttttagctggtgcaattacaatgttattaactgaccgtaatataaaaacttccttttttgatccaacaggaggaggagacccaatattattccaacacttgttc	10182	98.13	Ophiocten gracilis	100	BOLD	Yes	Yes	Ophiocten gracilis
839	South	76	31.223	310	30	August	09.08.2018	Ophiopluteus normal	538	Posterodorsal arm	tttgtcaggccctaccgcacatgcaggaggctgcgtagacctcgcaattttttctctccacctagcaggtgcatcttcaattatggcctcaataaaatttattacaactattataaatatgcgtaggcccggcatgaccatggatcgacttccgctttttgtttgatctattttcttaacaactatattactactcctttctctgcctgttttagcaggagctattacaatgctactaactgatcgtaacataaaaacaacgttttttgatcctacaggaggaggagacccaatacttttccaacatttattt	7427	99.35	Ophiopholis aculeata	100	BOLD	Yes	Yes	Ophiopholis aculeata
840	South	76	31.223	310	30	August	09.08.2018	Nudibranch	NA	NA	tctttctggggctattgggcatggaggttgttctgttgatctagctattttttctttgcacctagcaggaatgtcttctcttcttggtgcaattaattttattactactatttttaacatacggtctccagctatgactttagaccggttgagattatttgtgtggtctgttcttgttactgcttttttattgttactttctttacctgttttagcaggagcaattacaatgttacttacagatcgtaattttaatactaggttttttgacccagctggtggaggggatcctattttgtatcaacacttattc	3579	98.63	Dendronotus kalikal	100	BOLD	Yes	Yes	Dendronotus kalikal
841	South	76	31.223	310	30	August	09.08.2018	Isopoda	NA	NA	ctgtccgggaatatcgcgcatggtgggagctctgttgatcttgcaattttttctcttcatttagcaggagcttcctcaattttaggggcagtaaattttatcacaacttttattaatatacgaactcccggggttactttagaccgagctcctttatttacttggtccgtttttatcactgctgtattattgctattgtctttacctgttttagctggggctattactatgctgcttacagatcgaaacttaaatacttccttttttgaccctagcggagggggagaccccattctgtaccaacacttattt	8620	99.83	No match	0	No match	No match	No	Unknown
842	South	76	31.223	310	30	August	09.08.2018	Unknown blob eyes	NA	NA	tcttgctggaaatctagctcatgctggaggttcagtagatttagctattttttctttacatttggctggagcttcttcaattttaggtgctattaattttatcacaactattattaatatgcgttgacgaggaatacattttgagcgtttacctttatttgtgtgatctgttaaaattactgcagtattattattattatctttacctgttttagctggggcaattactatattattaactgaccgtaattttaatactgctttttttgatcctgcaggaggtggagaccctattttatatcagcatttattt	16643	99.98	Cephalothrix iwatai	99	BOLD	Yes	Yes	Cephalothrix iwatai
843	South	76	31.223	310	30	August	09.08.2018	Mitraria	NA	NA	actctctggtaatgtctctcatgccggggggtctgtagatttagctattttttctttacacttagcaggtgcatcttcgattttaggtgctgttaatttcatgtgcacagtaataaatatacgatctgatgatgctgaatttgaacaaacacctttatttgtggtggctatttacttaacagtattacttctgcttttatctctacctgtactagcaggggggatcactatattgttaacagatcgaaattttaatactagattttttgacccagcaggtgggggtgacccagtgctttttgctcatttgttt	7357	99.44	Galathowenia oculata	100	BOLD	Yes	Yes	Galathowenia oculata
844	South	76	31.223	310	30	August	09.08.2018	Unknown blob eyes	NA	NA	actctctggtaatgtctctcatgccggggggtctgtagatttagctattttttctttacacttagcaggtgcatcttcgattttaggtgctgttaatttcatgtgcacagtaataaatatacgatctgatgatgctgaatttgaacaaacacctttatttgtggtggctatttacttaacagtattacttctgcttttatctctacctgtactagcaggggggatcactatattgttaacagatcgaaattttaatactagattttttgacccagcaggtgggggtgacccagtgctttttgctcatttgttt	19556	99.5	Galathowenia oculata	100	BOLD	Yes	No	Unknown
845	South	76	31.223	310	30	August	09.08.2018	Unknown blob eyes	NA	NA	attaagcacttctttcatgagcttatcaccttcaagtacaggaaatcttatctttggtttattaatctctggtatatcctcatgtctcacatctcttaatttctatacaacaattctaaatctgagatcttattatctgaatttaaagactatgccattattcccttgggctctcttcattacaggaggaatgcttttattaacattaccaatcttatcaggagctcttctaatggtcttggctgatcttcattctaatacacttttctttgaaccaatctttggaggagatcctatattctatcaacacttattt	1724	29.7	Thoracosphaera heimii	96.8	BLAST	No	No	Unknown
846	South	76	31.223	310	30	August	09.08.2018	Mitraria	NA	NA	actctctggtaatgtctctcatgccggggggtctgtagatttagctattttttctttacacttagcaggtgcatcttcgattttaggtgctgttaatttcatgtgcacagtaataaatatacgatctgatgatgctgaatttgaacaaacacctttatttgtggtggctatttacttaacagtattacttctgcttttatctctacctgtactagcaggggggatcactatattgttaacagatcgaaattttaatactagattttttgacccagcaggtgggggtgacccagtgctttttgctcatttgttt	9422	99.85	Galathowenia oculata	100	BOLD	Yes	Yes	Galathowenia oculata
847	South	76	31.223	310	30	August	09.08.2018	Mitraria	NA	NA	actctctggtaatgtctctcatgccggggggtctgtagatttagctattttttctttacacttagcaggtgcatcttcgattttaggtgctgttaatttcatgtgcacagtaataaatatacgatctgatgatgctgaatttgaacaaacacctttatttgtggtggctatttacttaacagtattacttctgcttttatctctacctgtactagcaggggggatcactatattgttaacagatcgaaattttaatactagattttttgacccagcaggtgggggtgacccagtgctttttgctcatttgttt	9007	99.78	Galathowenia oculata	100	BOLD	Yes	Yes	Galathowenia oculata
848	South	76	31.223	310	30	August	09.08.2018	Ophiopluteus normal	783	Posterodorsal arm	ttatcaggtccggtagctcacgcaggtggttgtgtagatttagcaatattttctttacatttagctggtgcttcttctataatggcctcaataaattttataactacaataattaatatgcgagctcccggtatgacaatggaccgagtccctttatttgtttgatcaatttttattacaacttttttattattattatctttaccagttttagctggtgcaattacaatgttattaactgaccgtaatataaaaacttccttttttgatccaacaggaggaggagacccaatattattccaacacttgttc	6156	99.69	Ophiocten gracilis	100	BOLD	Yes	Yes	Ophiocten gracilis
849	South	76	31.223	310	30	August	09.08.2018	Unknown blob eyes	NA	NA	ttattcctcttttccagcttcttccttcttatctactgatttaattattttttctttacatttggctggtgcttcttctattttatcttctattaattttattgttactgtttatattttacctttaaattcctttttatctttttttcaatatcctttgtttattgttgctcaattgactgttagttttttattattaatttctttgcccgttttagctgctgctattactatgttattatttgatcgtaatttttcaacttccttcttttctaactatctaggtggtgatgcccttttatatcaacatttattt	85	49.41	No match	0	No match	No match	No	Insufficient reads
850	South	76	31.223	310	30	August	09.08.2018	Unknown blob eyes	NA	NA	aaataaacagccatatgacagtatatgtgtgaatataccctgaaaaagaatataattaaaaaatgcagacccaacatgcataccatcctataatgaacctgtatgaaaagaagcttgttgttgttgataaaatataaacattataatgcatactaattatatgtctagatcctaagagaggattacaattatgatatgagattaaaatatatccctatttatacagaatttacagtttatatgtatatcacaagaatagcttagcaaacaagaattagttttttgataaaaaaacaaaaca	168	20.83	No match	0	No match	No match	No	Insufficient reads
851	South	76	31.223	310	30	August	09.08.2018	Limacina	NA	NA	attaagtaatataggtcacataactcaaagagtagatttttgtattttttcattacatttagcaggtttatcatcaattattggggcaatcaacataattacaacaattatagtaagacgttcaaaaataataacactatctcgaataagattatatttatgaagaatattaattactttaattttattattactatccttacctgtacttgcaggtgctatcacaatactattactagatcgtaattttaacactacattttttgatcctgtaggaggaggtgatccaatcttatttcaacatctattt	437	99.54	Limacina helicina	100	BOLD	No	Yes	Limacina helicina
852	South	76	31.223	310	30	August	09.08.2018	Unknown blob eyes	NA	NA	tttatcaagtattcagagccatgcaggtcctgctgttgattttgctatatttagtttacatatcgcgggagtatcttctttgttaggagctattaattttattactacaatttttaatatgagaatgagtgcttttacattacatagattacctctttttatatggtctgttttaattacagcttttttattattattatcattacctgtattagcagcagctttaacaatgctattaactgatagaaattttaatactacattttttgatccagccggtggaggtgatccagtattatttcaacatcttttt	139	43.17	Pyropia haitanensis	82.5	BLAST	No	No	Insufficient reads
853	South	76	31.223	310	30	August	09.08.2018	Juvenile ophiuroid	NA	NA	ttatcaggtccggtagctcacgcaggtggttgtgtagatttagcaatattttctttacatttagctggtgcttcttctataatggcctcaataaattttataactacaataattaatatgcgagctcccggtatgacaatggaccgagtccctttatttgtttgatcaatttttattacaacttttttattattattatctttaccagttttagctggtgcaattacaatgttattaactgaccgtaatataaaaacttccttttttgatccaacaggaggaggagacccaatattattccaacacttgttc	19574	99.67	Ophiocten gracilis	100	BOLD	Yes	Yes	Ophiocten gracilis
854	South	76	31.223	310	30	August	09.08.2018	Planula	NA	NA	ttatcagggcctcaaactcattcaggaggttctgtagatttagctatttttagtttacattgtgcaggtgcttcttctattatgggtgcagttaattttattactactatatttaatatgagagcaccaggaatgtcttttgacagattaccattatttgtttgatctgttttaatcaccgctttcttattactactttctctgcctgtcctagcaggagctataactatgttactaacagatagaaacttcaatacaaccttctttgaccccgctggaggaggtgatcctgtattataccaacatttattt	1209	99.67	Rathkea octopunctata	100	BOLD	No	Yes	Rathkea octopunctata
872	South	75.94	29.966	200	40	April	30.04.2018	Nudibranch	NA	NA	tctttcgggggctattggacatggaggctgttctgttgatttggctattttttctttacatttggcaggtatatcttctcttctaggtgcaattaattttattactactatttttaatatgcggtctccagcaatgactttggatcgtctaagattgtttgtatggtctgtcttggtcactgctttcttgcttttgctttccttacctgttttggccggagcaattactatgttgttaactgaccgtaattttaatactagattttttgacccggctggtggtggagatcctattttgtaccaacatttattt	1486	89.03	Dendronotus patricki	100	BLAST	Yes	Yes	Dendronotus patricki
873	South	75.94	29.966	200	40	April	30.04.2018	trochophore	NA	NA	ttatcaggtccggtagctcacgcaggtggttgtgtagatttagcaatattttctttacatttagctggtgcttcttctataatggcctcaataaattttataactacaataattaatatgcgagctcccggtatgacaatggaccgagtccctttatttgtttgatcaatttttattacaacttttttattattattatctttaccagttttagctggtgcaattacaatgttattaactgaccgtaatataaaaacttccttttttgatccaacaggaggaggagacccaatattattccaacacttgttc	3	33.33	Ophiocten gracilis	100	BOLD	Yes	No	Insufficient reads
874	South	75.94	29.966	200	40	April	30.04.2018	Unknown	NA	NA	ttatcagctggtattgcacatgcaggagcctctgttgatatgggaattttttctttacatattgctggagcttcatctattttgggagcagtaaattttattactactgtaattaacatacgatctgcgggaatgacaatagaccgaattcctttatttgtatgatcagtatttattacagctattttacttttattatctttaccggttctagcaggagctattactatacttttaacagatcgtaatttaaatacctctttttttgaccctgcaggaggaggagaccctattttatatcaacatttattt	4358	97.84	Thysanoessa inermis	100	BOLD	No	Yes	Thysanoessa inermis
875	South	75.94	29.966	200	40	April	30.04.2018	Nudibranch	NA	NA	tctttcgggggctattggacatggaggctgttctgttgatttggctattttttctttacatttggcaggtatatcttctcttctaggtgcaattaattttattactactatttttaatatgcggtctccagcaatgactttggatcgtctaagattgtttgtatggtctgtcttggtcactgctttcttgcttttgctttccttacctgttttggccggagcaattactatgttgttaactgaccgtaattttaatactagattttttgacccggctggtggtggagatcctattttgtaccaacatttattt	84	96.43	Dendronotus patricki	100	BLAST	Yes	Yes	Dendronotus patricki
876	South	75.94	29.966	200	40	April	30.04.2018	Ophiopluteus large	780	Posterodorsal arm	tttatctgggccagtagcacacgcaggtggttgtgtagacttagcaatattttctttacatttagctggtgcttcttctataatggcttcaataaattttattacaacaataataaatatgcgagctcccggtatgacaatggaccgaactcccttatttgtttgatcaatttttattacaacttttttattattattatcactaccagttttagctggggcaattacaatgcttcttactgaccgtaaaattaaaacttctttctttgaccccacaggagggggagaccctatattatttcaacatttattt	40	92.5	Ophiocten sericeum	100	BOLD	Yes	Yes	Ophiocten sericeum
877	South	75.94	29.966	200	40	April	30.04.2018	Egg fish	NA	NA	gttgagcactgtgggccatagagggggcgctgtggatttgggtatcttctccttacaccttgctggcgttagaagaatcttggggagagctaattttattaccaccatctctaatataaaaggtgaaggcatatctatagaacttatgcctttattcgtgtgggcggtgctcctcacagctatcttacttttgctctctcttcctgtattagctggtgctattactatgttactaacagaccgtaattttaacacctctttctttgaccctgctggtggcggggacccgattttataccaacacctattt	4162	83.66	Sagitta elegans	94.2	BLAST	No	Yes	Sagitta elegans 94.2 %
878	South	75.94	29.966	200	40	April	30.04.2018	Ophiopluteus large	585	Posterodorsal arm	tttatctgggccagtagcacacgcaggtggttgtgtagacttagcaatattttctttacatttagctggtgcttcttctataatggcttcaataaattttattacaacaataataaatatgcgagctcccggtatgacaatggaccgaactcccttatttgtttgatcaatttttattacaacttttttattattattatcactaccagttttagctggggcaattacaatgcttcttactgaccgtaaaattaaaacttctttctttgaccccacaggagggggagaccctatattatttcaacatttattt	649	97.23	Ophiocten sericeum	100	BOLD	Yes	Yes	Ophiocten sericeum
879	South	75.94	29.966	200	40	April	30.04.2018	Ophiopluteus large	966	Posterodorsal arm	tttatctgggccagtagcacacgcaggtggttgtgtagacttagcaatattttctttacatttagctggtgcttcttctataatggcttcaataaattttattacaacaataataaatatgcgagctcccggtatgacaatggaccgaactcccttatttgtttgatcaatttttattacaacttttttattattattatcactaccagttttagctggggcaattacaatgcttcttactgaccgtaaaattaaaacttctttctttgaccccacaggagggggagaccctatattatttcaacatttattt	395	98.48	Ophiocten sericeum	100	BOLD	Yes	Yes	Ophiocten sericeum
880	South	75.94	29.966	200	40	April	30.04.2018	Egg fish	NA	NA	gttgagcactgtgggccatagagggggcgctgtggatttgggtatcttctccttacaccttgctggcgttagaagaatcttggggagagctaattttattaccaccatctctaatataaaaggtgaaggcatatctatagaacttatgcctttattcgtgtgggcggtgctcctcacagctatcttacttttgctctctcttcctgtattagctggtgctattactatgttactaacagaccgtaattttaacacctctttctttgaccctgctggtggcggggacccgattttataccaacacctattt	13646	82.95	Sagitta elegans	94.2	BLAST	No	Yes	Sagitta elegans 94.2 %
881	South	75.94	29.966	200	40	April	30.04.2018	Egg dark	NA	NA	tttgtcaggaattttagctcattctggtggcgctgtcgatttagctatttttagcttacatttggcgggtatttcgtctattttaggagctataaattttattgtaactattttaaacatgcgttgtcctggtatgactgctcatagaacacctttatttgtttgggctgtttttataacagcttttttacttttgttatcacttcctgttttagctggcgctattacaatgttattaacagatagaaattttaatacgtctttctttgatccaaacggtggtggtgatcctgtcttatatcagcatttgttt	5448	92.49	Phaeocystis antarctica	91.6	BOLD	No	No	Unknown
882	South	75.94	29.966	200	40	April	30.04.2018	Egg dark	NA	NA	tttgtcaggaattttagctcattctggtggcgctgtcgatttagctatttttagcttacatttggcgggtatttcgtctattttaggagctataaattttattgtaactattttaaacatgcgttgtcctggtatgactgctcatagaacacctttatttgtttgggctgtttttataacagcttttttacttttgttatcacttcctgttttagctggcgctattacaatgttattaacagatagaaattttaatacgtctttctttgatccaaacggtggtggtgatcctgtcttatatcagcatttgttt	68	23.53	Phaeocystis antarctica	91.6	BOLD	No	No	Insufficient reads
883	South	75.94	29.966	200	40	April	30.04.2018	Egg dark	NA	NA	tatcaagtaatattgcacatgcgggggcttctgtggattttgctatcttctccctgcacttagccggagttagctcgatcttgggtgctgtaaattttattagtactttggggaaccttcgtgtgtttggtatacttttagaccgtatgccactatttgcttgggcggtactcattaccgctgtccttctcctattatcattacccgtcctagcaggagctatcaccatattattaacagatcgaaacctaaatacgaccttctatgacgtggggggggggagatcctatcttataccagcacctattt	42	35.71	Calanus glacialis	100	BOLD	No	Yes	Insufficient reads
884	South	75.94	29.966	200	40	April	30.04.2018	Ophiopluteus large	713	Posterodorsal arm	tttatctgggccagtagcacacgcaggtggttgtgtagacttagcaatattttctttacatttagctggtgcttcttctataatggcttcaataaattttattacaacaataataaatatgcgagctcccggtatgacaatggaccgaactcccttatttgtttgatcaatttttattacaacttttttattattattatcactaccagttttagctggggcaattacaatgcttcttactgaccgtaaaattaaaacttctttctttgaccccacaggagggggagaccctatattatttcaacatttattt	913	81.38	Ophiocten sericeum	100	BOLD	Yes	Yes	Ophiocten sericeum
885	South	75.94	29.966	200	40	April	30.04.2018	Egg dark	NA	NA	tatcaagtaatattgcacatgcgggggcttctgtggattttgctatcttctccctgcacttagccggagttagctcgatcttgggtgctgtaaattttattagtactttggggaaccttcgtgtgtttggtatacttttagaccgtatgccactatttgcttgggcggtactcattaccgctgtccttctcctattatcattacccgtcctagcaggagctatcaccatattattaacagatcgaaacctaaatacgaccttctatgacgtggggggggggagatcctatcttataccagcacctattt	224	23.66	Calanus glacialis	100	BOLD	No	Yes	Insufficient reads
886	South	75.94	29.966	200	40	April	30.04.2018	Egg fish	NA	NA	gttgagcactgtgggccatagagggggcgctgtggatttgggtatcttctccttacaccttgctggcgttagaagaatcttggggagagctaattttattaccaccatctctaatataaaaggtgaaggcatatctatagaacttatgcctttattcgtgtgggcggtgctcctcacagctatcttacttttgctctctcttcctgtattagctggtgctattactatgttactaacagaccgtaattttaacacctctttctttgaccctgctggtggcggggacccgattttataccaacacctattt	5412	97.01	Sagitta elegans	94.2	BLAST	No	Yes	Sagitta elegans 94.2 %
888	South	75.94	29.966	305	200	April	30.04.2018	Egg fish	NA	NA	gttgagcactgtgggccatagagggggcgctgtggatttgggtatcttctccttacaccttgctggcgttagaagaatcttggggagagctaattttattaccaccatctctaatataaaaggtgaaggcatatctatagaacttatgcctttattcgtgtgggcggtgctcctcacagctatcttacttttgctctctcttcctgtattagctggtgctattactatgttactaacagaccgtaattttaacacctctttctttgaccctgctggtggcggggacccgattttataccaacacctattt	7357	91.03	Sagitta elegans	94.2	BLAST	No	Yes	Sagitta elegans 94.2 %
889	South	75.94	29.966	305	200	April	30.04.2018	Ophiopluteus	286	Posterodorsal arm	tttgtcaggaattttagctcattctggtggcgctgtcgatttagctatttttagcttacatttggcgggtatttcgtctattttaggagctataaattttattgtaactattttaaacatgcgttgtcctggtatgactgctcatagaacacctttatttgtttgggctgtttttataacagcttttttacttttgttatcacttcctgttttagctggcgctattacaatgttattaacagatagaaattttaatacgtctttctttgatccaaacggtggtggtgatcctgtcttatatcagcatttgttt	763	56.75	Phaeocystis antarctica	91.6	BOLD	No	No	Insufficient reads
890	South	75.94	29.966	305	200	April	30.04.2018	Egg fish	NA	NA	gttgagcactgtgggccatagagggggcgctgtggatttgggtatcttctccttacaccttgctggcgttagaagaatcttggggagagctaattttattaccaccatctctaatataaaaggtgaaggcatatctatagaacttatgcctttattcgtgtgggcggtgctcctcacagctatcttacttttgctctctcttcctgtattagctggtgctattactatgttactaacagaccgtaattttaacacctctttctttgaccctgctggtggcggggacccgattttataccaacacctattt	5845	84.21	Sagitta elegans	94.2	BLAST	No	Yes	Sagitta elegans 94.2 %
891	South	75.94	29.966	305	200	April	30.04.2018	Ophiopluteus	269	Posterodorsal arm	tttgtcaggaattttagctcattctggtggcgctgtcgatttagctatttttagcttacatttggcgggtatttcgtctattttaggagctataaattttattgtaactattttaaacatgcgttgtcctggtatgactgctcatagaacacctttatttgtttgggctgtttttataacagcttttttacttttgttatcacttcctgttttagctggcgctattacaatgttattaacagatagaaattttaatacgtctttctttgatccaaacggtggtggtgatcctgtcttatatcagcatttgttt	30	73.33	Phaeocystis antarctica	91.6	BOLD	No	No	Insufficient reads
892	South	75.94	29.966	305	200	April	30.04.2018	Ophiopluteus	314	Posterodorsal arm	ttatcaggtccggtagctcacgcaggtggttgtgtagatttagcaatattttctttacatttagctggtgcttcttctataatggcctcaataaattttataactacaataattaatatgcgagctcccggtatgacaatggaccgagtccctttatttgtttgatcaatttttattacaacttttttattattattatctttaccagttttagctggtgcaattacaatgttattaactgaccgtaatataaaaacttccttttttgatccaacaggaggaggagacccaatattattccaacacttgttc	1689	90.47	Ophiocten gracilis	100	BOLD	Yes	Yes	Ophiocten gracilis
893	South	75.94	29.966	305	200	April	30.04.2018	Egg dark	NA	NA	tatcaagtaatattgcacatgcgggggcttctgtggattttgctatcttctccctgcacttagccggagttagctcgatcttgggtgctgtaaattttattagtactttggggaaccttcgtgtgtttggtatacttttagaccgtatgccactatttgcttgggcggtactcattaccgctgtccttctcctattatcattacccgtcctagcaggagctatcaccatattattaacagatcgaaacctaaatacgaccttctatgacgtggggggggggagatcctatcttataccagcacctattt	1242	93.08	Calanus glacialis	100	BOLD	No	Yes	Calanus glacialis
894	South	75.94	29.966	305	200	April	30.04.2018	Ophiopluteus	382	Posterodorsal arm	ttatcaggtccggtagctcacgcaggtggttgtgtagatttagcaatattttctttacatttagctggtgcttcttctataatggcctcaataaattttataactacaataattaatatgcgagctcccggtatgacaatggaccgagtccctttatttgtttgatcaatttttattacaacttttttattattattatctttaccagttttagctggtgcaattacaatgttattaactgaccgtaatataaaaacttccttttttgatccaacaggaggaggagacccaatattattccaacacttgttc	3365	96.58	Ophiocten gracilis	100	BOLD	Yes	Yes	Ophiocten gracilis
895	South	75.94	29.966	305	200	April	30.04.2018	Egg dark	NA	NA	tttgtcaggaattttagctcattctggtggcgctgtcgatttagctatttttagcttacatttggcgggtatttcgtctattttaggagctataaattttattgtaactattttaaacatgcgttgtcctggtatgactgctcatagaacacctttatttgtttgggctgtttttataacagcttttttacttttgttatcacttcctgttttagctggcgctattacaatgttattaacagatagaaattttaatacgtctttctttgatccaaacggtggtggtgatcctgtcttatatcagcatttgttt	8952	80.92	Phaeocystis antarctica	91.6	BOLD	No	No	Unknown
896	South	75.94	29.966	305	200	April	30.04.2018	Egg fish	NA	NA	gttgagcactgtgggccatagagggggcgctgtggatttgggtatcttctccttacaccttgctggcgttagaagaatcttggggagagctaattttattaccaccatctctaatataaaaggtgaaggcatatctatagaacttatgcctttattcgtgtgggcggtgctcctcacagctatcttacttttgctctctcttcctgtattagctggtgctattactatgttactaacagaccgtaattttaacacctctttctttgaccctgctggtggcggggacccgattttataccaacacctattt	10843	98.11	Sagitta elegans	94.2	BLAST	No	Yes	Sagitta elegans 94.2 %
897	South	75.94	29.966	305	200	April	30.04.2018	Ophiopluteus	369	Posterodorsal arm	ttatcaggtccggtagctcacgcaggtggttgtgtagatttagcaatattttctttacatttagctggtgcttcttctataatggcctcaataaattttataactacaataattaatatgcgagctcccggtatgacaatggaccgagtccctttatttgtttgatcaatttttattacaacttttttattattattatctttaccagttttagctggtgcaattacaatgttattaactgaccgtaatataaaaacttccttttttgatccaacaggaggaggagacccaatattattccaacacttgttc	6495	69.9	Ophiocten gracilis	100	BOLD	Yes	Yes	Ophiocten gracilis
898	South	75.94	29.966	305	200	April	30.04.2018	nudibranch 2	NA	NA	tttatctggggctgtaggacatgggggttgttctgtagatttagctattttttctcttcatttggctggtatatcttccttattaggggctattaattttattactacaatttttaatatgcgttctcctgctataactttagatcgattaagcttatttgtttgatctgttcttgttactgcttttttattacttttagctcttcctgttttagcaggtgcaattactatgctattaactgatcgaaattttaatactagattttttgacccagctggagggggagatcctattttatatcagcatttattt	5088	96.97	Doto fragilis	100	BOLD	Yes	Yes	Doto fragilis
899	South	75.94	29.966	305	200	April	30.04.2018	Egg fish	NA	NA	gttgagcactgtgggccatagagggggcgctgtggatttgggtatcttctccttacaccttgctggcgttagaagaatcttggggagagctaattttattaccaccatctctaatataaaaggtgaaggcatatctatagaacttatgcctttattcgtgtgggcggtgctcctcacagctatcttacttttgctctctcttcctgtattagctggtgctattactatgttactaacagaccgtaattttaacacctctttctttgaccctgctggtggcggggacccgattttataccaacacctattt	10885	92.12	Sagitta elegans	94.2	BLAST	No	Yes	Sagitta elegans 94.2 %
900	South	75.94	29.966	305	200	April	30.04.2018	Egg dark	NA	NA	tatcaagtaatattgcacatgcgggggcttctgtggattttgctatcttctccctgcacttagccggagttagctcgatcttgggtgctgtaaattttattagtactttggggaaccttcgtgtgtttggtatacttttagaccgtatgccactatttgcttgggcggtactcattaccgctgtccttctcctattatcattacccgtcctagcaggagctatcaccatattattaacagatcgaaacctaaatacgaccttctatgacgtggggggggggagatcctatcttataccagcacctattt	105	43.81	Calanus glacialis	100	BOLD	No	Yes	Insufficient reads
901	South	75.94	29.966	305	200	April	30.04.2018	Egg fish	NA	NA	gttgagcactgtgggccatagagggggcgctgtggatttgggtatcttctccttacaccttgctggcgttagaagaatcttggggagagctaattttattaccaccatctctaatataaaaggtgaaggcatatctatagaacttatgcctttattcgtgtgggcggtgctcctcacagctatcttacttttgctctctcttcctgtattagctggtgctattactatgttactaacagaccgtaattttaacacctctttctttgaccctgctggtggcggggacccgattttataccaacacctattt	15262	98.98	Sagitta elegans	94.2	BLAST	No	Yes	Sagitta elegans 94.2 %
902	South	75.94	29.966	305	200	April	30.04.2018	Ophiopluteus	347	Posterodorsal arm	ttatcaggtccggtagctcacgcaggtggttgtgtagatttagcaatattttctttacatttagctggtgcttcttctataatggcctcaataaattttataactacaataattaatatgcgagctcccggtatgacaatggaccgagtccctttatttgtttgatcaatttttattacaacttttttattattattatctttaccagttttagctggtgcaattacaatgttattaactgaccgtaatataaaaacttccttttttgatccaacaggaggaggagacccaatattattccaacacttgttc	214	95.79	Ophiocten gracilis	100	BOLD	Yes	Yes	Ophiocten gracilis
903	South	75.94	29.966	305	200	April	30.04.2018	Egg fish	NA	NA	gttgagcactgtgggccatagagggggcgctgtggatttgggtatcttctccttacaccttgctggcgttagaagaatcttggggagagctaattttattaccaccatctctaatataaaaggtgaaggcatatctatagaacttatgcctttattcgtgtgggcggtgctcctcacagctatcttacttttgctctctcttcctgtattagctggtgctattactatgttactaacagaccgtaattttaacacctctttctttgaccctgctggtggcggggacccgattttataccaacacctattt	13420	98.9	Sagitta elegans	94.2	BLAST	No	Yes	Sagitta elegans 94.2 %
904	South	75.94	29.966	305	200	April	30.04.2018	Egg fish	NA	NA	gttgagcactgtgggccatagagggggcgctgtggatttgggtatcttctccttacaccttgctggcgttagaagaatcttggggagagctaattttattaccaccatctctaatataaaaggtgaaggcatatctatagaacttatgcctttattcgtgtgggcggtgctcctcacagctatcttacttttgctctctcttcctgtattagctggtgctattactatgttactaacagaccgtaattttaacacctctttctttgaccctgctggtggcggggacccgattttataccaacacctattt	8898	98.15	Sagitta elegans	94.2	BLAST	No	Yes	Sagitta elegans 94.2 %
905	South	75.94	29.966	305	200	April	30.04.2018	Ophiopluteus	299	Posterodorsal arm	ttatcaggtccggtagctcacgcaggtggttgtgtagatttagcaatattttctttacatttagctggtgcttcttctataatggcctcaataaattttataactacaataattaatatgcgagctcccggtatgacaatggaccgagtccctttatttgtttgatcaatttttattacaacttttttattattattatctttaccagttttagctggtgcaattacaatgttattaactgaccgtaatataaaaacttccttttttgatccaacaggaggaggagacccaatattattccaacacttgttc	6328	68.76	Ophiocten gracilis	100	BOLD	Yes	Yes	Ophiocten gracilis
906	South	75.94	29.966	305	200	April	30.04.2018	Egg dark	NA	NA	tatcaagtaatattgcacatgcgggggcttctgtggattttgctatcttctccctgcacttagccggagttagctcgatcttgggtgctgtaaattttattagtactttggggaaccttcgtgtgtttggtatacttttagaccgtatgccactatttgcttgggcggtactcattaccgctgtccttctcctattatcattacccgtcctagcaggagctatcaccatattattaacagatcgaaacctaaatacgaccttctatgacgtggggggggggagatcctatcttataccagcacctattt	2767	94.94	Calanus glacialis	100	BOLD	No	Yes	Calanus glacialis
907	South	75.94	29.966	305	200	April	30.04.2018	Egg fish	NA	NA	gttgagcactgtgggccatagagggggcgctgtggatttgggtatcttctccttacaccttgctggcgttagaagaatcttggggagagctaattttattaccaccatctctaatataaaaggtgaaggcatatctatagaacttatgcctttattcgtgtgggcggtgctcctcacagctatcttacttttgctctctcttcctgtattagctggtgctattactatgttactaacagaccgtaattttaacacctctttctttgaccctgctggtggcggggacccgattttataccaacacctattt	5899	70.67	Sagitta elegans	94.2	BLAST	No	Yes	Sagitta elegans 94.2 %
908	South	75.94	29.966	305	200	April	30.04.2018	Egg fish	NA	NA	gttgagcactgtgggccatagagggggcgctgtggatttgggtatcttctccttacaccttgctggcgttagaagaatcttggggagagctaattttattaccaccatctctaatataaaaggtgaaggcatatctatagaacttatgcctttattcgtgtgggcggtgctcctcacagctatcttacttttgctctctcttcctgtattagctggtgctattactatgttactaacagaccgtaattttaacacctctttctttgaccctgctggtggcggggacccgattttataccaacacctattt	4159	99.9	Sagitta elegans	94.2	BLAST	No	Yes	Sagitta elegans 94.2 %
909	South	75.94	29.966	305	200	April	30.04.2018	Ophiopluteus	310	Posterodorsal arm	ttatcaggtccggtagctcacgcaggtggttgtgtagatttagcaatattttctttacatttagctggtgcttcttctataatggcctcaataaattttataactacaataattaatatgcgagctcccggtatgacaatggaccgagtccctttatttgtttgatcaatttttattacaacttttttattattattatctttaccagttttagctggtgcaattacaatgttattaactgaccgtaatataaaaacttccttttttgatccaacaggaggaggagacccaatattattccaacacttgttc	4629	99.7	Ophiocten gracilis	100	BOLD	Yes	Yes	Ophiocten gracilis
910	South	75.94	29.966	305	200	April	30.04.2018	Ophiopluteus	327	Posterodorsal arm	tttgtcaggaattttagctcattctggtggcgctgtcgatttagctatttttagcttacatttggcgggtatttcgtctattttaggagctataaattttattgtaactattttaaacatgcgttgtcctggtatgactgctcatagaacacctttatttgtttgggctgtttttataacagcttttttacttttgttatcacttcctgttttagctggcgctattacaatgttattaacagatagaaattttaatacgtctttctttgatccaaacggtggtggtgatcctgtcttatatcagcatttgttt	2628	70.09	Phaeocystis antarctica	91.6	BOLD	No	No	Unknown
911	South	75.94	29.966	305	200	April	30.04.2018	Cyphonaute	NA	NA	gctagcaagaaatatttctcatagaggaagatctgttgaccttgcaatcttctcccttcatctggcaggtgcttcttctattctaggagctattaattttataactactattattaacatgcgaagatcgtcaataacttttgctcggatacccctattcatctgatccgtatttattacagctattttactggtcctttccttaccagtcctagcgggtgcaattacaatacttctcacggaccgtaatttaaataccacttttttcgaccctgctgggggaggggatcccatcctataccaacacttattt	16037	99.66	Alcyonidium mamillatum	99.4	BLAST	Yes	Yes	Alcyonidium mamillatum
912	South	75.94	29.966	305	200	April	30.04.2018	Ophiopluteus	413	Posterodorsal arm	ttatcaggtccggtagctcacgcaggtggttgtgtagatttagcaatattttctttacatttagctggtgcttcttctataatggcctcaataaattttataactacaataattaatatgcgagctcccggtatgacaatggaccgagtccctttatttgtttgatcaatttttattacaacttttttattattattatctttaccagttttagctggtgcaattacaatgttattaactgaccgtaatataaaaacttccttttttgatccaacaggaggaggagacccaatattattccaacacttgttc	13848	88.16	Ophiocten gracilis	100	BOLD	Yes	Yes	Ophiocten gracilis
913	South	75.94	29.966	305	200	April	30.04.2018	Ophiopluteus	365	Posterodorsal arm	ttatcaggtccggtagctcacgcaggtggttgtgtagatttagcaatattttctttacatttagctggtgcttcttctataatggcctcaataaattttataactacaataattaatatgcgagctcccggtatgacaatggaccgagtccctttatttgtttgatcaatttttattacaacttttttattattattatctttaccagttttagctggtgcaattacaatgttattaactgaccgtaatataaaaacttccttttttgatccaacaggaggaggagacccaatattattccaacacttgttc	8384	99.87	Ophiocten gracilis	100	BOLD	Yes	Yes	Ophiocten gracilis
914	South	75.94	29.966	305	200	April	30.04.2018	Egg fish	NA	NA	gttgagcactgtgggccatagagggggcgctgtggatttgggtatcttctccttacaccttgctggcgttagaagaatcttggggagagctaattttattaccaccatctctaatataaaaggtgaaggcatatctatagaacttatgcctttattcgtgtgggcggtgctcctcacagctatcttacttttgctctctcttcctgtattagctggtgctattactatgttactaacagaccgtaattttaacacctctttctttgaccctgctggtggcggggacccgattttataccaacacctattt	6241	95.24	Sagitta elegans	94.2	BLAST	No	Yes	Sagitta elegans 94.2 %
915	South	75.94	29.966	305	200	April	30.04.2018	nudibranch 1	NA	NA	tctttcgggggctattggacatggaggctgttctgttgatttggctattttttctttacatttggcaggtatatcttctcttctaggtgcaattaattttattactactatttttaatatgcggtctccagcaatgactttggatcgtctaagattgtttgtatggtctgtcttggtcactgctttcttgcttttgctttccttacctgttttggccggagcaattactatgttgttaactgaccgtaattttaatactagattttttgacccggctggtggtggagatcctattttgtaccaacatttattt	149	91.28	Dendronotus patricki	100	BLAST	Yes	Yes	Dendronotus patricki
916	South	75.94	29.966	305	200	April	30.04.2018	Egg dark	NA	NA	tctggccagaaatgtggcacacgcaggaagttctgtagactttgctatcttctctcttcacttagcaggggtctcctcaatcttaggggctattaactttattaggactctgggaaaccttcgtgtctttggtatgttcctagatcgaatacccctgttcgcatgagcagttcttattacaacaattttacttcttttgtcccttcctgtgctcgcaggggccatcacgatattattaacagaccggaacctgaatacctcgttttatgacgtgggaggagggggggaccctattctctaccagcacctgttt	2962	91.59	Metridia longa	99.6	BOLD	No	Yes	Metridia longa
917	South	75.94	29.966	305	200	April	30.04.2018	Ophiopluteus	332	Posterodorsal arm	ttatcaggtccggtagctcacgcaggtggttgtgtagatttagcaatattttctttacatttagctggtgcttcttctataatggcctcaataaattttataactacaataattaatatgcgagctcccggtatgacaatggaccgagtccctttatttgtttgatcaatttttattacaacttttttattattattatctttaccagttttagctggtgcaattacaatgttattaactgaccgtaatataaaaacttccttttttgatccaacaggaggaggagacccaatattattccaacacttgttc	3582	85.87	Ophiocten gracilis	100	BOLD	Yes	Yes	Ophiocten gracilis
918	South	75.94	29.966	305	200	April	30.04.2018	Unknown blob eyes	NA	NA	tctttctggggctattgggcatggaggttgttctgttgatctagctattttttctttgcacctagcaggaatgtcttctcttcttggtgcaattaattttattactactatttttaacatacggtctccagctatgactttagaccggttgagattatttgtgtggtctgttcttgttactgcttttttattgttactttctttacctgttttagcaggagcaattacaatgttacttacagatcgtaattttaatactaggttttttgacccagctggtggaggggatcctattttgtatcaacacttattc	5037	98.61	Dendronotus kalikal	100	BOLD	Yes	No	Unknown
919	South	75.94	29.966	305	200	April	30.04.2018	Ophiopluteus	517	Posterodorsal arm	ttatcaggtccggtagctcacgcaggtggttgtgtagatttagcaatattttctttacatttagctggtgcttcttctataatggcctcaataaattttataactacaataattaatatgcgagctcccggtatgacaatggaccgagtccctttatttgtttgatcaatttttattacaacttttttattattattatctttaccagttttagctggtgcaattacaatgttattaactgaccgtaatataaaaacttccttttttgatccaacaggaggaggagacccaatattattccaacacttgttc	9821	95.6	Ophiocten gracilis	100	BOLD	Yes	Yes	Ophiocten gracilis
920	South	75.94	29.966	305	200	April	30.04.2018	Egg dark	NA	NA	tctggccagaaatgtggcacacgcaggaagttctgtagactttgctatcttctctcttcacttagcaggggtctcctcaatcttaggggctattaactttattaggactctgggaaaccttcgtgtctttggtatgttcctagatcgaatacccctgttcgcatgagcagttcttattacaacaattttacttcttttgtcccttcctgtgctcgcaggggccatcacgatattattaacagaccggaacctgaatacctcgttttatgacgtgggaggagggggggaccctattctctaccagcacctgttt	1179	84.48	Metridia longa	99.6	BOLD	No	Yes	Metridia longa
921	South	75.94	29.966	305	200	April	30.04.2018	Unknown jelly	NA	NA	tttatcagggcctcaaactcattctggaggttctgtagatatggctatatttagcctacattgtgcaggagcctcatctatagcaggtgcaataaattttattaccactatatttaatatgagaaccccaggccttacttttgataaattacctttatttgtttgatccgtattaattactgcttttttattacttttatctttaccagtcttagctggtgctataacaatgttattaacagatagaaattttaatactacattttttgaccctgcaggggggggcgatcctgttttatatcagcatttattt	10614	97.79	Plotocnide borealis	100	BOLD	No	Yes	Plotocnide borealis
922	South	75.94	29.966	305	200	April	30.04.2018	isopod	NA	NA	tttgtcaggaattttagctcattctggtggcgctgtcgatttagctatttttagcttacatttggcgggtatttcgtctattttaggagctataaattttattgtaactattttaaacatgcgttgtcctggtatgactgctcatagaacacctttatttgtttgggctgtttttataacagcttttttacttttgttatcacttcctgttttagctggcgctattacaatgttattaacagatagaaattttaatacgtctttctttgatccaaacggtggtggtgatcctgtcttatatcagcatttgttt	2736	47.55	Phaeocystis antarctica	91.6	BOLD	No	No	Unknown
923	South	75.94	29.966	305	200	April	30.04.2018	Ophiopluteus	345	Posterodorsal arm	ttatcaggtccggtagctcacgcaggtggttgtgtagatttagcaatattttctttacatttagctggtgcttcttctataatggcctcaataaattttataactacaataattaatatgcgagctcccggtatgacaatggaccgagtccctttatttgtttgatcaatttttattacaacttttttattattattatctttaccagttttagctggtgcaattacaatgttattaactgaccgtaatataaaaacttccttttttgatccaacaggaggaggagacccaatattattccaacacttgttc	7920	90.3	Ophiocten gracilis	100	BOLD	Yes	Yes	Ophiocten gracilis
924	South	75.94	29.966	305	200	April	30.04.2018	Ophiopluteus	321	Posterodorsal arm	ttatcaggtccggtagctcacgcaggtggttgtgtagatttagcaatattttctttacatttagctggtgcttcttctataatggcctcaataaattttataactacaataattaatatgcgagctcccggtatgacaatggaccgagtccctttatttgtttgatcaatttttattacaacttttttattattattatctttaccagttttagctggtgcaattacaatgttattaactgaccgtaatataaaaacttccttttttgatccaacaggaggaggagacccaatattattccaacacttgttc	9996	49.05	Ophiocten gracilis	100	BOLD	Yes	Yes	Ophiocten gracilis
[truncated: 783 more rows]
